# Supplementary material for: Triboluminescence of Centrosymmetric Lanthanide β-Diketonate Complexes with Aggregation-Induced Emission
Source: Molecules. 2019 Feb 13;24(4):662. doi: 10.3390/molecules24040662 (PMC6412301; doi:10.3390/molecules24040662)
Supplement: Supplementary file 1 [file molecules-24-00662-s001.zip]

Archive with 5 entries (5 files):
- SI-Molecules/[Eu(mm-dbm-Cl2)3phen] checkcif.pdf
- SI-Molecules/[Eu(mm-dbm-Cl2)3phen].cif
- SI-Molecules/[Eu(pp-dbm-Cl2)3phen] checkcif.pdf
- SI-Molecules/[Eu(pp-dbm-Cl2)3phen].cif
- SI-Molecules/Supporting-GL-Molecules-Feb 2019-revised.docx
