# Supplementary material for: Triboluminescence of Centrosymmetric Lanthanide β-Diketonate Complexes with Aggregation-Induced Emission
Source: Molecules. 2019 Feb 13;24(4):662. doi: 10.3390/molecules24040662 (PMC6412301; doi:10.3390/molecules24040662)
Supplement: Supplementary file 1 [file molecules-24-00662-s001.zip › SI-Molecules/[Eu(mm-dbm-Cl2)3phen].cif]

 
data_1_a
 
_audit_creation_method            'SHELXL-2016/6'
_shelx_SHELXL_version_number      '2016/6'
_chemical_name_systematic         ?
_chemical_name_common             ?
_chemical_melting_point           ?
_chemical_formula_moiety          ?
_chemical_formula_sum
 'C57 H35 Cl6 Eu N2 O6' 
_chemical_formula_weight          1208.53

loop_
 _atom_type_symbol
 _atom_type_description
 _atom_type_scat_dispersion_real
 _atom_type_scat_dispersion_imag
 _atom_type_scat_source
 'C'  'C'   0.0033   0.0016
 'International Tables Vol C Tables 4.2.6.8 and 6.1.1.4'
 'H'  'H'   0.0000   0.0000
 'International Tables Vol C Tables 4.2.6.8 and 6.1.1.4'
 'Cl'  'Cl'   0.1484   0.1585
 'International Tables Vol C Tables 4.2.6.8 and 6.1.1.4'
 'Eu'  'Eu'  -0.1578   3.6682
 'International Tables Vol C Tables 4.2.6.8 and 6.1.1.4'
 'N'  'N'   0.0061   0.0033
 'International Tables Vol C Tables 4.2.6.8 and 6.1.1.4'
 'O'  'O'   0.0106   0.0060
 'International Tables Vol C Tables 4.2.6.8 and 6.1.1.4'
 
_space_group_crystal_system       monoclinic
_space_group_IT_number            14
_space_group_name_H-M_alt         'P 21/n'
_space_group_name_Hall            '-P 2yn'
 
_shelx_space_group_comment
;
The symmetry employed for this shelxl refinement is uniquely defined
by the following loop, which should always be used as a source of
symmetry information in preference to the above space-group names.
They are only intended as comments.
;
 
loop_
 _space_group_symop_operation_xyz
 'x, y, z'
 '-x+1/2, y+1/2, -z+1/2'
 '-x, -y, -z'
 'x-1/2, -y-1/2, z-1/2'
 
_cell_length_a                    13.8631(6)
_cell_length_b                    16.6671(9)
_cell_length_c                    22.7611(11)
_cell_angle_alpha                 90
_cell_angle_beta                  105.529(2)
_cell_angle_gamma                 90
_cell_volume                      5067.1(4)
_cell_formula_units_Z             4
_cell_measurement_temperature     233(2)
_cell_measurement_reflns_used     9806
_cell_measurement_theta_min       2.22
_cell_measurement_theta_max       26.37
 
_exptl_crystal_description        block
_exptl_crystal_colour             yellow
_exptl_crystal_density_meas       ?
_exptl_crystal_density_method     ?
_exptl_crystal_density_diffrn     1.584          
_exptl_crystal_F_000              2416
_exptl_transmission_factor_min    ?
_exptl_transmission_factor_max    ?
_exptl_crystal_size_max           0.54
_exptl_crystal_size_mid           0.31
_exptl_crystal_size_min           0.12
_exptl_absorpt_coefficient_mu     1.609
_shelx_estimated_absorpt_T_min    ?
_shelx_estimated_absorpt_T_max    ?
_exptl_absorpt_correction_type    'multi-scan'
_exptl_absorpt_correction_T_min   0.6561
_exptl_absorpt_correction_T_max   0.7454
_exptl_absorpt_process_details    
;
 SADABS 2016/2: Krause, L., Herbst-Irmer, R., Sheldrick G.M. & Stalke D.,
 J. Appl. Cryst. 48 (2015) 3-10
;
_exptl_absorpt_special_details    ?
_diffrn_ambient_temperature       233(2)
_diffrn_radiation_wavelength      0.71073
_diffrn_radiation_type            MoK\a
_diffrn_source                    'micro focus'
_diffrn_measurement_device_type   'Bruker D8 Venture Photon II'
_diffrn_measurement_method        'phi and omega scans'
_diffrn_detector_area_resol_mean  ?
_diffrn_reflns_number             42523
_diffrn_reflns_av_unetI/netI      0.0317
_diffrn_reflns_av_R_equivalents   0.0376
_diffrn_reflns_limit_h_min        -16
_diffrn_reflns_limit_h_max        17
_diffrn_reflns_limit_k_min        -20
_diffrn_reflns_limit_k_max        18
_diffrn_reflns_limit_l_min        -28
_diffrn_reflns_limit_l_max        25
_diffrn_reflns_theta_min          2.223
_diffrn_reflns_theta_max          26.390
_diffrn_reflns_theta_full         25.242
_diffrn_measured_fraction_theta_max   0.998
_diffrn_measured_fraction_theta_full  0.999
_diffrn_reflns_Laue_measured_fraction_max    0.998
_diffrn_reflns_Laue_measured_fraction_full   0.999
_diffrn_reflns_point_group_measured_fraction_max   0.998
_diffrn_reflns_point_group_measured_fraction_full  0.999
_reflns_number_total              10366
_reflns_number_gt                 8693
_reflns_threshold_expression      'I > 2\s(I)'
_reflns_Friedel_coverage          0.000
_reflns_Friedel_fraction_max      .
_reflns_Friedel_fraction_full     .
 
_reflns_special_details
;
 Reflections were merged by SHELXL according to the crystal
 class for the calculation of statistics and refinement.
 
 _reflns_Friedel_fraction is defined as the number of unique
 Friedel pairs measured divided by the number that would be
 possible theoretically, ignoring centric projections and
 systematic absences.
;
 
_computing_data_collection        'Bruker Apex3'
_computing_cell_refinement        'Bruker Saint'
_computing_data_reduction         'Bruker Saint'
_computing_structure_solution     'SHELXT 2014/5 (Sheldrick, 2014)'
_computing_structure_refinement 'SHELXL-2016/6 (Sheldrick, 2016)'
_computing_molecular_graphics     ?
_computing_publication_material   ?
_refine_special_details           ?
_refine_ls_structure_factor_coef  Fsqd
_refine_ls_matrix_type            full
_refine_ls_weighting_scheme       calc
_refine_ls_weighting_details
'w=1/[\s^2^(Fo^2^)+(0.0235P)^2^+3.2325P] where P=(Fo^2^+2Fc^2^)/3'
_atom_sites_solution_primary      ?
_atom_sites_solution_secondary    ?
_atom_sites_solution_hydrogens    geom
_refine_ls_hydrogen_treatment     constr
_refine_ls_extinction_method      none
_refine_ls_extinction_coef        .
_refine_ls_number_reflns          10366
_refine_ls_number_parameters      649
_refine_ls_number_restraints      0
_refine_ls_R_factor_all           0.0377
_refine_ls_R_factor_gt            0.0270
_refine_ls_wR_factor_ref          0.0618
_refine_ls_wR_factor_gt           0.0570
_refine_ls_goodness_of_fit_ref    1.027
_refine_ls_restrained_S_all       1.027
_refine_ls_shift/su_max           0.005
_refine_ls_shift/su_mean          0.000
 
loop_
 _atom_site_label
 _atom_site_type_symbol
 _atom_site_fract_x
 _atom_site_fract_y
 _atom_site_fract_z
 _atom_site_U_iso_or_equiv
 _atom_site_adp_type
 _atom_site_occupancy
 _atom_site_site_symmetry_order  
 _atom_site_calc_flag
 _atom_site_refinement_flags_posn
 _atom_site_refinement_flags_adp
 _atom_site_refinement_flags_occupancy
 _atom_site_disorder_assembly
 _atom_site_disorder_group
Eu1 Eu 0.61644(2) 0.23232(2) 0.63753(2) 0.02607(4) Uani 1 1 d . . . . .
Cl1 Cl 0.09037(6) 0.01022(8) 0.41401(5) 0.0858(4) Uani 1 1 d . . . . .
Cl2 Cl 0.87148(6) 0.15546(7) 0.40810(4) 0.0696(3) Uani 1 1 d . . . . .
Cl3 Cl 0.33264(6) 0.68530(6) 0.65613(4) 0.0636(2) Uani 1 1 d . . . . .
Cl4 Cl 0.92753(8) 0.39320(7) 0.47274(5) 0.0869(3) Uani 1 1 d . . . . .
Cl5 Cl 1.22366(5) 0.36577(6) 0.69288(4) 0.0603(2) Uani 1 1 d . . . . .
Cl6 Cl 0.63459(8) 0.23003(7) 0.94448(4) 0.0775(3) Uani 1 1 d . . . . .
O1 O 0.46108(12) 0.18205(12) 0.58564(8) 0.0356(4) Uani 1 1 d . . . . .
O2 O 0.63245(12) 0.16487(11) 0.54835(8) 0.0352(4) Uani 1 1 d . . . . .
O3 O 0.53676(13) 0.35003(12) 0.65953(8) 0.0393(4) Uani 1 1 d . . . . .
O4 O 0.63389(17) 0.33516(12) 0.57179(9) 0.0510(5) Uani 1 1 d . . . . .
O5 O 0.78885(13) 0.23315(14) 0.64116(8) 0.0457(5) Uani 1 1 d . . . . .
O6 O 0.71309(12) 0.25579(11) 0.73758(8) 0.0336(4) Uani 1 1 d . . . . .
N1 N 0.65935(15) 0.09096(13) 0.68355(10) 0.0336(5) Uani 1 1 d . . . . .
N2 N 0.51848(14) 0.18177(13) 0.71552(9) 0.0319(5) Uani 1 1 d . . . . .
C1 C 0.4454(2) 0.22345(19) 0.72857(13) 0.0416(7) Uani 1 1 d . . . . .
H1 H 0.422889 0.270135 0.705868 0.050 Uiso 1 1 calc R U . . .
C2 C 0.4003(2) 0.2019(2) 0.77406(15) 0.0577(9) Uani 1 1 d . . . . .
H2 H 0.348123 0.233003 0.781381 0.069 Uiso 1 1 calc R U . . .
C3 C 0.4332(3) 0.1348(2) 0.80779(15) 0.0622(10) Uani 1 1 d . . . . .
H3 H 0.404836 0.119825 0.839333 0.075 Uiso 1 1 calc R U . . .
C4 C 0.5096(2) 0.0882(2) 0.79519(13) 0.0503(8) Uani 1 1 d . . . . .
C5 C 0.5482(3) 0.0172(2) 0.82841(16) 0.0664(10) Uani 1 1 d . . . . .
H5 H 0.523040 0.000756 0.860950 0.080 Uiso 1 1 calc R U . . .
C6 C 0.6194(3) -0.0262(2) 0.81392(15) 0.0636(10) Uani 1 1 d . . . . .
H6 H 0.644048 -0.072276 0.836818 0.076 Uiso 1 1 calc R U . . .
C7 C 0.6591(2) -0.00398(19) 0.76419(13) 0.0463(7) Uani 1 1 d . . . . .
C8 C 0.7308(2) -0.0499(2) 0.74592(16) 0.0581(9) Uani 1 1 d . . . . .
H8 H 0.756212 -0.097068 0.767072 0.070 Uiso 1 1 calc R U . . .
C9 C 0.7632(2) -0.0258(2) 0.69744(17) 0.0581(9) Uani 1 1 d . . . . .
H9 H 0.809774 -0.056902 0.684121 0.070 Uiso 1 1 calc R U . . .
C10 C 0.7266(2) 0.04582(19) 0.66748(14) 0.0454(7) Uani 1 1 d . . . . .
H10 H 0.750872 0.062505 0.634627 0.054 Uiso 1 1 calc R U . . .
C11 C 0.62526(18) 0.06617(16) 0.73134(12) 0.0347(6) Uani 1 1 d . . . . .
C12 C 0.54958(19) 0.11394(17) 0.74750(11) 0.0343(6) Uani 1 1 d . . . . .
C13 C 0.26192(19) 0.07240(18) 0.48438(14) 0.0424(7) Uani 1 1 d . . . . .
H13 H 0.285260 0.069827 0.449272 0.051 Uiso 1 1 calc R U . . .
C14 C 0.1666(2) 0.0469(2) 0.48269(15) 0.0487(8) Uani 1 1 d . . . . .
C15 C 0.1300(2) 0.0507(2) 0.53283(17) 0.0604(9) Uani 1 1 d . . . . .
H15 H 0.064473 0.033792 0.530573 0.072 Uiso 1 1 calc R U . . .
C16 C 0.1907(2) 0.0797(2) 0.58634(16) 0.0624(10) Uani 1 1 d . . . . .
H16 H 0.167115 0.081620 0.621383 0.075 Uiso 1 1 calc R U . . .
C17 C 0.2862(2) 0.1061(2) 0.58918(14) 0.0482(8) Uani 1 1 d . . . . .
H17 H 0.326613 0.127022 0.625906 0.058 Uiso 1 1 calc R U . . .
C18 C 0.32285(18) 0.10194(17) 0.53870(12) 0.0356(6) Uani 1 1 d . . . . .
C19 C 0.42720(17) 0.13032(16) 0.54402(12) 0.0321(6) Uani 1 1 d . . . . .
C20 C 0.47855(18) 0.10229(17) 0.50363(12) 0.0349(6) Uani 1 1 d . . . . .
H20 H 0.447177 0.064088 0.474344 0.042 Uiso 1 1 calc R U . . .
C21 C 0.57515(18) 0.12825(16) 0.50438(11) 0.0310(6) Uani 1 1 d . . . . .
C22 C 0.61316(18) 0.11523(16) 0.44911(11) 0.0325(6) Uani 1 1 d . . . . .
C23 C 0.5538(2) 0.08557(19) 0.39400(13) 0.0441(7) Uani 1 1 d . . . . .
H23 H 0.487094 0.070675 0.390638 0.053 Uiso 1 1 calc R U . . .
C24 C 0.5925(2) 0.0780(2) 0.34418(13) 0.0541(8) Uani 1 1 d . . . . .
H24 H 0.551777 0.058290 0.307107 0.065 Uiso 1 1 calc R U . . .
C25 C 0.6902(2) 0.0989(2) 0.34841(14) 0.0527(8) Uani 1 1 d . . . . .
H25 H 0.716718 0.093160 0.314718 0.063 Uiso 1 1 calc R U . . .
C26 C 0.7482(2) 0.12846(19) 0.40282(13) 0.0447(7) Uani 1 1 d . . . . .
C27 C 0.71106(19) 0.13697(17) 0.45298(12) 0.0370(6) Uani 1 1 d . . . . .
H27 H 0.752100 0.157480 0.489673 0.044 Uiso 1 1 calc R U . . .
C28 C 0.43980(19) 0.55046(17) 0.65590(13) 0.0388(6) Uani 1 1 d . . . . .
H28 H 0.447302 0.568679 0.618292 0.047 Uiso 1 1 calc R U . . .
C29 C 0.3873(2) 0.59562(18) 0.68762(14) 0.0421(7) Uani 1 1 d . . . . .
C30 C 0.3759(2) 0.5713(2) 0.74317(14) 0.0498(8) Uani 1 1 d . . . . .
H30 H 0.340214 0.603157 0.764248 0.060 Uiso 1 1 calc R U . . .
C31 C 0.4174(2) 0.4997(2) 0.76731(14) 0.0484(8) Uani 1 1 d . . . . .
H31 H 0.410441 0.482525 0.805306 0.058 Uiso 1 1 calc R U . . .
C32 C 0.46942(19) 0.45270(18) 0.73600(12) 0.0396(6) Uani 1 1 d . . . . .
H32 H 0.496784 0.403483 0.752666 0.048 Uiso 1 1 calc R U . . .
C33 C 0.48161(18) 0.47772(17) 0.67991(12) 0.0345(6) Uani 1 1 d . . . . .
C34 C 0.53666(18) 0.42419(17) 0.64679(12) 0.0332(6) Uani 1 1 d . . . . .
C35 C 0.58448(19) 0.45742(17) 0.60574(12) 0.0370(6) Uani 1 1 d . . . . .
H35 H 0.584693 0.513500 0.601411 0.044 Uiso 1 1 calc R U . . .
C36 C 0.63211(19) 0.41058(17) 0.57081(12) 0.0353(6) Uani 1 1 d . . . . .
C37 C 0.6872(2) 0.44925(17) 0.52977(12) 0.0353(6) Uani 1 1 d . . . . .
C38 C 0.6600(2) 0.52184(18) 0.50122(13) 0.0429(7) Uani 1 1 d . . . . .
H38 H 0.605523 0.550449 0.508020 0.052 Uiso 1 1 calc R U . . .
C39 C 0.7127(3) 0.5529(2) 0.46246(15) 0.0532(8) Uani 1 1 d . . . . .
H39 H 0.691749 0.601271 0.441765 0.064 Uiso 1 1 calc R U . . .
C40 C 0.7951(2) 0.5137(2) 0.45400(14) 0.0532(8) Uani 1 1 d . . . . .
H40 H 0.831824 0.535506 0.428620 0.064 Uiso 1 1 calc R U . . .
C41 C 0.8226(2) 0.4421(2) 0.48326(14) 0.0483(8) Uani 1 1 d . . . . .
C42 C 0.7689(2) 0.40806(19) 0.51971(13) 0.0446(7) Uani 1 1 d . . . . .
H42 H 0.787081 0.357567 0.537659 0.054 Uiso 1 1 calc R U . . .
C43 C 1.04473(18) 0.29511(18) 0.68555(12) 0.0359(6) Uani 1 1 d . . . . .
H43 H 1.050680 0.315435 0.724889 0.043 Uiso 1 1 calc R U . . .
C44 C 1.11994(18) 0.30728(19) 0.65720(12) 0.0377(6) Uani 1 1 d . . . . .
C45 C 1.1148(2) 0.2767(2) 0.60051(13) 0.0473(8) Uani 1 1 d . . . . .
H45 H 1.167218 0.285112 0.582209 0.057 Uiso 1 1 calc R U . . .
C46 C 1.0314(2) 0.2336(2) 0.57099(13) 0.0516(8) Uani 1 1 d . . . . .
H46 H 1.026966 0.211940 0.532235 0.062 Uiso 1 1 calc R U . . .
C47 C 0.9542(2) 0.22184(19) 0.59755(12) 0.0428(7) Uani 1 1 d . . . . .
H47 H 0.897133 0.192924 0.576588 0.051 Uiso 1 1 calc R U . . .
C48 C 0.96020(18) 0.25241(16) 0.65508(11) 0.0326(6) Uani 1 1 d . . . . .
C49 C 0.87153(18) 0.24192(17) 0.68041(12) 0.0344(6) Uani 1 1 d . . . . .
C50 C 0.88383(19) 0.24231(18) 0.74322(12) 0.0385(7) Uani 1 1 d . . . . .
H50 H 0.949036 0.240686 0.769348 0.046 Uiso 1 1 calc R U . . .
C51 C 0.80266(19) 0.24503(16) 0.76882(11) 0.0314(6) Uani 1 1 d . . . . .
C52 C 0.81782(19) 0.23640(17) 0.83626(11) 0.0334(6) Uani 1 1 d . . . . .
C53 C 0.9109(2) 0.22582(18) 0.87758(12) 0.0394(6) Uani 1 1 d . . . . .
H53 H 0.968781 0.224758 0.863580 0.047 Uiso 1 1 calc R U . . .
C54 C 0.9191(2) 0.21684(18) 0.93896(13) 0.0464(7) Uani 1 1 d . . . . .
H54 H 0.982253 0.209130 0.966532 0.056 Uiso 1 1 calc R U . . .
C55 C 0.8340(3) 0.21920(19) 0.95997(13) 0.0499(8) Uani 1 1 d . . . . .
H55 H 0.839317 0.214261 1.001854 0.060 Uiso 1 1 calc R U . . .
C56 C 0.7425(2) 0.2288(2) 0.91922(13) 0.0477(7) Uani 1 1 d . . . . .
C57 C 0.7329(2) 0.23802(18) 0.85731(12) 0.0400(7) Uani 1 1 d . . . . .
H57 H 0.669455 0.245296 0.829943 0.048 Uiso 1 1 calc R U . . .
 
loop_
 _atom_site_aniso_label
 _atom_site_aniso_U_11
 _atom_site_aniso_U_22
 _atom_site_aniso_U_33
 _atom_site_aniso_U_23
 _atom_site_aniso_U_13
 _atom_site_aniso_U_12
Eu1 0.02445(6) 0.03033(8) 0.02586(7) 0.00093(6) 0.01098(4) -0.00153(5)
Cl1 0.0379(4) 0.1289(10) 0.0914(7) -0.0562(7) 0.0185(4) -0.0269(5)
Cl2 0.0511(5) 0.1036(8) 0.0657(5) -0.0058(5) 0.0357(4) -0.0084(5)
Cl3 0.0612(5) 0.0521(6) 0.0848(6) 0.0051(5) 0.0326(4) 0.0230(4)
Cl4 0.0871(7) 0.1038(9) 0.0941(7) 0.0285(6) 0.0665(6) 0.0370(6)
Cl5 0.0413(4) 0.0936(7) 0.0482(4) -0.0058(4) 0.0158(3) -0.0278(4)
Cl6 0.0816(6) 0.1150(9) 0.0529(5) -0.0100(5) 0.0475(5) -0.0181(6)
O1 0.0269(8) 0.0465(12) 0.0341(10) -0.0046(9) 0.0093(7) -0.0029(8)
O2 0.0287(9) 0.0459(12) 0.0325(9) -0.0093(8) 0.0109(7) -0.0036(8)
O3 0.0452(10) 0.0335(12) 0.0469(11) 0.0073(9) 0.0255(9) 0.0059(8)
O4 0.0838(15) 0.0309(12) 0.0546(13) 0.0077(10) 0.0470(11) 0.0057(10)
O5 0.0277(9) 0.0808(16) 0.0315(10) -0.0079(10) 0.0126(8) -0.0095(9)
O6 0.0288(9) 0.0448(12) 0.0291(9) -0.0054(8) 0.0112(7) -0.0050(7)
N1 0.0324(11) 0.0326(13) 0.0352(12) 0.0011(10) 0.0079(9) 0.0011(9)
N2 0.0311(10) 0.0355(14) 0.0323(11) -0.0004(10) 0.0141(9) -0.0050(9)
C1 0.0391(14) 0.0459(19) 0.0472(16) 0.0000(14) 0.0242(13) -0.0013(13)
C2 0.0597(19) 0.067(2) 0.061(2) -0.0012(18) 0.0417(17) -0.0033(17)
C3 0.075(2) 0.079(3) 0.0483(19) 0.0017(19) 0.0424(17) -0.013(2)
C4 0.0616(19) 0.056(2) 0.0363(16) 0.0050(15) 0.0178(14) -0.0160(16)
C5 0.087(3) 0.067(3) 0.047(2) 0.0223(18) 0.0220(18) -0.013(2)
C6 0.081(2) 0.050(2) 0.0485(19) 0.0242(17) -0.0012(18) -0.0104(19)
C7 0.0472(16) 0.0378(18) 0.0443(17) 0.0070(14) -0.0043(13) -0.0048(13)
C8 0.057(2) 0.0354(19) 0.069(2) 0.0079(16) -0.0065(17) 0.0035(15)
C9 0.0455(17) 0.045(2) 0.078(2) -0.0089(18) 0.0066(17) 0.0139(15)
C10 0.0395(15) 0.0431(19) 0.0540(18) -0.0036(15) 0.0130(13) 0.0078(13)
C11 0.0356(13) 0.0323(16) 0.0325(14) 0.0000(12) 0.0029(11) -0.0072(11)
C12 0.0379(13) 0.0371(17) 0.0285(13) 0.0010(12) 0.0100(11) -0.0100(11)
C13 0.0338(14) 0.0450(19) 0.0500(17) -0.0068(14) 0.0136(12) -0.0019(12)
C14 0.0318(14) 0.049(2) 0.064(2) -0.0134(16) 0.0107(14) -0.0074(13)
C15 0.0342(16) 0.071(3) 0.080(2) -0.007(2) 0.0220(16) -0.0170(15)
C16 0.0468(18) 0.090(3) 0.057(2) 0.0012(19) 0.0246(16) -0.0181(18)
C17 0.0394(15) 0.062(2) 0.0442(17) 0.0024(15) 0.0132(13) -0.0095(14)
C18 0.0283(12) 0.0345(16) 0.0445(15) 0.0022(12) 0.0106(11) -0.0028(11)
C19 0.0286(12) 0.0330(16) 0.0338(14) 0.0067(12) 0.0068(10) -0.0011(11)
C20 0.0329(13) 0.0341(16) 0.0383(14) -0.0071(12) 0.0108(11) -0.0048(11)
C21 0.0319(12) 0.0289(15) 0.0335(13) 0.0029(11) 0.0108(10) 0.0050(10)
C22 0.0358(13) 0.0313(15) 0.0315(13) 0.0009(11) 0.0106(11) 0.0062(11)
C23 0.0435(15) 0.048(2) 0.0386(16) -0.0037(14) 0.0078(12) -0.0018(13)
C24 0.064(2) 0.065(2) 0.0319(15) -0.0122(15) 0.0097(14) -0.0041(17)
C25 0.068(2) 0.061(2) 0.0358(16) -0.0029(15) 0.0246(15) 0.0074(17)
C26 0.0443(15) 0.052(2) 0.0424(16) 0.0022(14) 0.0197(13) 0.0048(14)
C27 0.0352(13) 0.0435(18) 0.0330(14) -0.0015(12) 0.0103(11) 0.0034(12)
C28 0.0393(14) 0.0391(17) 0.0426(16) -0.0008(13) 0.0188(12) 0.0027(12)
C29 0.0372(14) 0.0379(18) 0.0537(18) -0.0043(14) 0.0165(13) 0.0048(12)
C30 0.0466(16) 0.058(2) 0.0512(18) -0.0119(16) 0.0244(14) 0.0038(15)
C31 0.0466(16) 0.062(2) 0.0408(16) -0.0034(15) 0.0191(13) -0.0021(15)
C32 0.0390(14) 0.0440(18) 0.0383(15) -0.0001(13) 0.0145(12) -0.0005(12)
C33 0.0316(13) 0.0374(17) 0.0369(14) -0.0036(12) 0.0134(11) -0.0010(11)
C34 0.0318(13) 0.0364(17) 0.0329(14) 0.0009(12) 0.0115(10) 0.0007(11)
C35 0.0436(15) 0.0309(16) 0.0414(15) 0.0050(12) 0.0197(12) 0.0028(12)
C36 0.0430(14) 0.0351(17) 0.0312(14) 0.0067(12) 0.0157(11) 0.0027(12)
C37 0.0462(15) 0.0326(16) 0.0320(14) 0.0017(12) 0.0191(12) -0.0011(12)
C38 0.0545(17) 0.0348(18) 0.0452(16) 0.0036(13) 0.0232(14) 0.0043(13)
C39 0.078(2) 0.0360(19) 0.0546(19) 0.0098(15) 0.0325(17) 0.0002(16)
C40 0.072(2) 0.051(2) 0.0487(18) 0.0024(16) 0.0375(16) -0.0089(16)
C41 0.0549(17) 0.054(2) 0.0452(17) 0.0041(15) 0.0293(14) 0.0076(15)
C42 0.0575(17) 0.0439(19) 0.0404(16) 0.0106(14) 0.0268(14) 0.0108(14)
C43 0.0316(13) 0.0507(18) 0.0274(13) -0.0024(12) 0.0112(10) -0.0037(12)
C44 0.0281(12) 0.0506(19) 0.0351(14) 0.0050(13) 0.0096(11) -0.0043(12)
C45 0.0396(15) 0.069(2) 0.0409(16) 0.0009(15) 0.0241(13) -0.0049(14)
C46 0.0481(17) 0.077(2) 0.0360(15) -0.0141(16) 0.0222(13) -0.0114(16)
C47 0.0344(14) 0.060(2) 0.0367(15) -0.0073(14) 0.0134(11) -0.0072(13)
C48 0.0290(12) 0.0413(18) 0.0297(13) 0.0026(11) 0.0117(10) 0.0001(10)
C49 0.0277(12) 0.0439(18) 0.0340(14) -0.0005(12) 0.0122(11) -0.0036(11)
C50 0.0272(12) 0.059(2) 0.0303(13) 0.0016(13) 0.0087(10) -0.0037(12)
C51 0.0343(13) 0.0325(16) 0.0302(13) -0.0048(11) 0.0132(10) -0.0068(10)
C52 0.0408(14) 0.0330(15) 0.0285(13) -0.0027(11) 0.0130(11) -0.0086(12)
C53 0.0433(15) 0.0392(17) 0.0356(14) -0.0012(13) 0.0106(11) -0.0067(12)
C54 0.0602(18) 0.041(2) 0.0338(15) -0.0003(13) 0.0050(13) -0.0087(14)
C55 0.078(2) 0.045(2) 0.0279(14) -0.0034(13) 0.0164(15) -0.0160(16)
C56 0.0656(19) 0.050(2) 0.0368(15) -0.0076(14) 0.0296(14) -0.0169(16)
C57 0.0434(15) 0.0484(18) 0.0325(14) -0.0046(13) 0.0174(12) -0.0088(13)
 
_geom_special_details
;
 All esds (except the esd in the dihedral angle between two l.s. planes)
 are estimated using the full covariance matrix.  The cell esds are taken
 into account individually in the estimation of esds in distances, angles
 and torsion angles; correlations between esds in cell parameters are only
 used when they are defined by crystal symmetry.  An approximate (isotropic)
 treatment of cell esds is used for estimating esds involving l.s. planes.
;
 
loop_
 _geom_bond_atom_site_label_1
 _geom_bond_atom_site_label_2
 _geom_bond_distance
 _geom_bond_site_symmetry_2
 _geom_bond_publ_flag
Eu1 O1 2.3181(16) . ?
Eu1 O4 2.3299(19) . ?
Eu1 O6 2.3454(17) . ?
Eu1 O5 2.3693(17) . ?
Eu1 O3 2.3699(18) . ?
Eu1 O2 2.3821(17) . ?
Eu1 N1 2.582(2) . ?
Eu1 N2 2.645(2) . ?
Cl1 C14 1.746(3) . ?
Cl2 C26 1.740(3) . ?
Cl3 C29 1.741(3) . ?
Cl4 C41 1.738(3) . ?
Cl5 C44 1.747(3) . ?
Cl6 C56 1.740(3) . ?
O1 C19 1.274(3) . ?
O2 C21 1.257(3) . ?
O3 C34 1.269(3) . ?
O4 C36 1.257(3) . ?
O5 C49 1.259(3) . ?
O6 C51 1.268(3) . ?
N1 C10 1.324(3) . ?
N1 C11 1.361(3) . ?
N2 C1 1.326(3) . ?
N2 C12 1.351(3) . ?
C1 C2 1.393(4) . ?
C1 H1 0.9400 . ?
C2 C3 1.364(5) . ?
C2 H2 0.9400 . ?
C3 C4 1.404(5) . ?
C3 H3 0.9400 . ?
C4 C12 1.411(4) . ?
C4 C5 1.429(5) . ?
C5 C6 1.334(5) . ?
C5 H5 0.9400 . ?
C6 C7 1.434(5) . ?
C6 H6 0.9400 . ?
C7 C11 1.399(4) . ?
C7 C8 1.402(5) . ?
C8 C9 1.359(5) . ?
C8 H8 0.9400 . ?
C9 C10 1.400(4) . ?
C9 H9 0.9400 . ?
C10 H10 0.9400 . ?
C11 C12 1.441(4) . ?
C13 C14 1.379(4) . ?
C13 C18 1.388(4) . ?
C13 H13 0.9400 . ?
C14 C15 1.368(4) . ?
C15 C16 1.369(5) . ?
C15 H15 0.9400 . ?
C16 C17 1.380(4) . ?
C16 H16 0.9400 . ?
C17 C18 1.377(4) . ?
C17 H17 0.9400 . ?
C18 C19 1.496(3) . ?
C19 C20 1.386(4) . ?
C20 C21 1.403(3) . ?
C20 H20 0.9400 . ?
C21 C22 1.504(3) . ?
C22 C27 1.385(3) . ?
C22 C23 1.394(4) . ?
C23 C24 1.385(4) . ?
C23 H23 0.9400 . ?
C24 C25 1.376(4) . ?
C24 H24 0.9400 . ?
C25 C26 1.374(4) . ?
C25 H25 0.9400 . ?
C26 C27 1.380(4) . ?
C27 H27 0.9400 . ?
C28 C29 1.378(4) . ?
C28 C33 1.391(4) . ?
C28 H28 0.9400 . ?
C29 C30 1.377(4) . ?
C30 C31 1.374(4) . ?
C30 H30 0.9400 . ?
C31 C32 1.385(4) . ?
C31 H31 0.9400 . ?
C32 C33 1.396(4) . ?
C32 H32 0.9400 . ?
C33 C34 1.502(4) . ?
C34 C35 1.397(3) . ?
C35 C36 1.400(4) . ?
C35 H35 0.9400 . ?
C36 C37 1.501(3) . ?
C37 C38 1.377(4) . ?
C37 C42 1.395(4) . ?
C38 C39 1.387(4) . ?
C38 H38 0.9400 . ?
C39 C40 1.374(4) . ?
C39 H39 0.9400 . ?
C40 C41 1.370(4) . ?
C40 H40 0.9400 . ?
C41 C42 1.377(4) . ?
C42 H42 0.9400 . ?
C43 C44 1.380(3) . ?
C43 C48 1.388(4) . ?
C43 H43 0.9400 . ?
C44 C45 1.371(4) . ?
C45 C46 1.374(4) . ?
C45 H45 0.9400 . ?
C46 C47 1.377(4) . ?
C46 H46 0.9400 . ?
C47 C48 1.387(4) . ?
C47 H47 0.9400 . ?
C48 C49 1.501(3) . ?
C49 C50 1.394(4) . ?
C50 C51 1.400(3) . ?
C50 H50 0.9400 . ?
C51 C52 1.499(3) . ?
C52 C57 1.385(4) . ?
C52 C53 1.389(4) . ?
C53 C54 1.379(4) . ?
C53 H53 0.9400 . ?
C54 C55 1.386(4) . ?
C54 H54 0.9400 . ?
C55 C56 1.366(4) . ?
C55 H55 0.9400 . ?
C56 C57 1.388(4) . ?
C57 H57 0.9400 . ?
 
loop_
 _geom_angle_atom_site_label_1
 _geom_angle_atom_site_label_2
 _geom_angle_atom_site_label_3
 _geom_angle
 _geom_angle_site_symmetry_1
 _geom_angle_site_symmetry_3
 _geom_angle_publ_flag
O1 Eu1 O4 100.41(7) . . ?
O1 Eu1 O6 140.02(6) . . ?
O4 Eu1 O6 111.74(7) . . ?
O1 Eu1 O5 144.18(6) . . ?
O4 Eu1 O5 74.99(7) . . ?
O6 Eu1 O5 69.90(6) . . ?
O1 Eu1 O3 89.13(6) . . ?
O4 Eu1 O3 70.19(6) . . ?
O6 Eu1 O3 80.45(6) . . ?
O5 Eu1 O3 120.71(7) . . ?
O1 Eu1 O2 71.40(6) . . ?
O4 Eu1 O2 75.56(7) . . ?
O6 Eu1 O2 138.31(6) . . ?
O5 Eu1 O2 73.10(6) . . ?
O3 Eu1 O2 136.54(6) . . ?
O1 Eu1 N1 87.63(7) . . ?
O4 Eu1 N1 151.57(7) . . ?
O6 Eu1 N1 75.44(7) . . ?
O5 Eu1 N1 82.56(7) . . ?
O3 Eu1 N1 137.67(6) . . ?
O2 Eu1 N1 81.44(7) . . ?
O1 Eu1 N2 69.69(6) . . ?
O4 Eu1 N2 145.64(7) . . ?
O6 Eu1 N2 70.36(6) . . ?
O5 Eu1 N2 132.28(6) . . ?
O3 Eu1 N2 76.69(6) . . ?
O2 Eu1 N2 127.10(6) . . ?
N1 Eu1 N2 62.68(7) . . ?
C19 O1 Eu1 136.94(16) . . ?
C21 O2 Eu1 136.44(15) . . ?
C34 O3 Eu1 136.86(16) . . ?
C36 O4 Eu1 137.90(17) . . ?
C49 O5 Eu1 138.05(17) . . ?
C51 O6 Eu1 137.74(16) . . ?
C10 N1 C11 118.0(2) . . ?
C10 N1 Eu1 120.61(19) . . ?
C11 N1 Eu1 120.64(17) . . ?
C1 N2 C12 118.1(2) . . ?
C1 N2 Eu1 122.94(18) . . ?
C12 N2 Eu1 118.75(16) . . ?
N2 C1 C2 123.6(3) . . ?
N2 C1 H1 118.2 . . ?
C2 C1 H1 118.2 . . ?
C3 C2 C1 118.7(3) . . ?
C3 C2 H2 120.6 . . ?
C1 C2 H2 120.6 . . ?
C2 C3 C4 119.7(3) . . ?
C2 C3 H3 120.1 . . ?
C4 C3 H3 120.1 . . ?
C3 C4 C12 117.5(3) . . ?
C3 C4 C5 123.1(3) . . ?
C12 C4 C5 119.4(3) . . ?
C6 C5 C4 121.0(3) . . ?
C6 C5 H5 119.5 . . ?
C4 C5 H5 119.5 . . ?
C5 C6 C7 121.4(3) . . ?
C5 C6 H6 119.3 . . ?
C7 C6 H6 119.3 . . ?
C11 C7 C8 117.4(3) . . ?
C11 C7 C6 119.5(3) . . ?
C8 C7 C6 123.1(3) . . ?
C9 C8 C7 119.6(3) . . ?
C9 C8 H8 120.2 . . ?
C7 C8 H8 120.2 . . ?
C8 C9 C10 119.5(3) . . ?
C8 C9 H9 120.2 . . ?
C10 C9 H9 120.2 . . ?
N1 C10 C9 122.6(3) . . ?
N1 C10 H10 118.7 . . ?
C9 C10 H10 118.7 . . ?
N1 C11 C7 122.8(3) . . ?
N1 C11 C12 117.9(2) . . ?
C7 C11 C12 119.2(3) . . ?
N2 C12 C4 122.3(3) . . ?
N2 C12 C11 118.3(2) . . ?
C4 C12 C11 119.4(3) . . ?
C14 C13 C18 119.0(3) . . ?
C14 C13 H13 120.5 . . ?
C18 C13 H13 120.5 . . ?
C15 C14 C13 121.9(3) . . ?
C15 C14 Cl1 119.5(2) . . ?
C13 C14 Cl1 118.6(2) . . ?
C14 C15 C16 118.8(3) . . ?
C14 C15 H15 120.6 . . ?
C16 C15 H15 120.6 . . ?
C15 C16 C17 120.5(3) . . ?
C15 C16 H16 119.8 . . ?
C17 C16 H16 119.8 . . ?
C18 C17 C16 120.6(3) . . ?
C18 C17 H17 119.7 . . ?
C16 C17 H17 119.7 . . ?
C17 C18 C13 119.3(2) . . ?
C17 C18 C19 118.8(2) . . ?
C13 C18 C19 122.0(2) . . ?
O1 C19 C20 124.7(2) . . ?
O1 C19 C18 115.5(2) . . ?
C20 C19 C18 119.8(2) . . ?
C19 C20 C21 123.1(2) . . ?
C19 C20 H20 118.5 . . ?
C21 C20 H20 118.5 . . ?
O2 C21 C20 123.9(2) . . ?
O2 C21 C22 116.6(2) . . ?
C20 C21 C22 119.5(2) . . ?
C27 C22 C23 118.9(2) . . ?
C27 C22 C21 117.8(2) . . ?
C23 C22 C21 123.3(2) . . ?
C24 C23 C22 120.3(3) . . ?
C24 C23 H23 119.9 . . ?
C22 C23 H23 119.9 . . ?
C25 C24 C23 120.7(3) . . ?
C25 C24 H24 119.7 . . ?
C23 C24 H24 119.7 . . ?
C26 C25 C24 118.8(3) . . ?
C26 C25 H25 120.6 . . ?
C24 C25 H25 120.6 . . ?
C25 C26 C27 121.6(3) . . ?
C25 C26 Cl2 118.8(2) . . ?
C27 C26 Cl2 119.6(2) . . ?
C26 C27 C22 119.8(3) . . ?
C26 C27 H27 120.1 . . ?
C22 C27 H27 120.1 . . ?
C29 C28 C33 119.6(3) . . ?
C29 C28 H28 120.2 . . ?
C33 C28 H28 120.2 . . ?
C30 C29 C28 121.8(3) . . ?
C30 C29 Cl3 119.1(2) . . ?
C28 C29 Cl3 119.1(2) . . ?
C31 C30 C29 119.0(3) . . ?
C31 C30 H30 120.5 . . ?
C29 C30 H30 120.5 . . ?
C30 C31 C32 120.4(3) . . ?
C30 C31 H31 119.8 . . ?
C32 C31 H31 119.8 . . ?
C31 C32 C33 120.6(3) . . ?
C31 C32 H32 119.7 . . ?
C33 C32 H32 119.7 . . ?
C28 C33 C32 118.7(2) . . ?
C28 C33 C34 122.3(2) . . ?
C32 C33 C34 118.9(2) . . ?
O3 C34 C35 124.6(2) . . ?
O3 C34 C33 115.7(2) . . ?
C35 C34 C33 119.8(2) . . ?
C34 C35 C36 122.6(3) . . ?
C34 C35 H35 118.7 . . ?
C36 C35 H35 118.7 . . ?
O4 C36 C35 123.9(2) . . ?
O4 C36 C37 115.4(2) . . ?
C35 C36 C37 120.7(2) . . ?
C38 C37 C42 119.1(3) . . ?
C38 C37 C36 123.4(2) . . ?
C42 C37 C36 117.5(2) . . ?
C37 C38 C39 120.2(3) . . ?
C37 C38 H38 119.9 . . ?
C39 C38 H38 119.9 . . ?
C40 C39 C38 120.7(3) . . ?
C40 C39 H39 119.6 . . ?
C38 C39 H39 119.6 . . ?
C41 C40 C39 118.7(3) . . ?
C41 C40 H40 120.7 . . ?
C39 C40 H40 120.7 . . ?
C40 C41 C42 121.7(3) . . ?
C40 C41 Cl4 118.4(2) . . ?
C42 C41 Cl4 119.9(2) . . ?
C41 C42 C37 119.4(3) . . ?
C41 C42 H42 120.3 . . ?
C37 C42 H42 120.3 . . ?
C44 C43 C48 119.0(2) . . ?
C44 C43 H43 120.5 . . ?
C48 C43 H43 120.5 . . ?
C45 C44 C43 122.0(3) . . ?
C45 C44 Cl5 118.3(2) . . ?
C43 C44 Cl5 119.7(2) . . ?
C44 C45 C46 118.6(2) . . ?
C44 C45 H45 120.7 . . ?
C46 C45 H45 120.7 . . ?
C45 C46 C47 120.7(3) . . ?
C45 C46 H46 119.6 . . ?
C47 C46 H46 119.6 . . ?
C46 C47 C48 120.3(3) . . ?
C46 C47 H47 119.8 . . ?
C48 C47 H47 119.8 . . ?
C47 C48 C43 119.3(2) . . ?
C47 C48 C49 118.1(2) . . ?
C43 C48 C49 122.5(2) . . ?
O5 C49 C50 124.5(2) . . ?
O5 C49 C48 115.1(2) . . ?
C50 C49 C48 120.4(2) . . ?
C49 C50 C51 122.4(2) . . ?
C49 C50 H50 118.8 . . ?
C51 C50 H50 118.8 . . ?
O6 C51 C50 123.2(2) . . ?
O6 C51 C52 115.8(2) . . ?
C50 C51 C52 121.0(2) . . ?
C57 C52 C53 119.3(2) . . ?
C57 C52 C51 117.0(2) . . ?
C53 C52 C51 123.8(2) . . ?
C54 C53 C52 120.6(3) . . ?
C54 C53 H53 119.7 . . ?
C52 C53 H53 119.7 . . ?
C53 C54 C55 120.0(3) . . ?
C53 C54 H54 120.0 . . ?
C55 C54 H54 120.0 . . ?
C56 C55 C54 119.4(3) . . ?
C56 C55 H55 120.3 . . ?
C54 C55 H55 120.3 . . ?
C55 C56 C57 121.4(3) . . ?
C55 C56 Cl6 120.1(2) . . ?
C57 C56 Cl6 118.5(2) . . ?
C52 C57 C56 119.4(3) . . ?
C52 C57 H57 120.3 . . ?
C56 C57 H57 120.3 . . ?
 
_refine_diff_density_max    0.418
_refine_diff_density_min   -0.556
_refine_diff_density_rms    0.067

_shelx_res_file
;
TITL 1_a.res in P2(1)/n
    1_a.res
    created by SHELXL-2016/6 at 16:03:34 on 05-Dec-2018
REM Old TITL 1 in P2(1)/n
REM SHELXT solution in P2(1)/n
REM R1 0.116,  Rweak 0.005,  Alpha 0.050,  Orientation as input
REM Formula found by SHELXT:  C56 Cl6 Eu N3 O6
CELL  0.71073  13.8631  16.6671  22.7611   90.000  105.529   90.000
ZERR    4.000   0.0006   0.0009   0.0011    0.000    0.002    0.000
LATT  1
SYMM 1/2-X, 1/2+Y, 1/2-Z
SFAC C H CL EU N O
UNIT 228 140 24 4 8 24
TEMP -40.150
L.S. 25
BOND $H
LIST 4
ACTA
FMAP 2
PLAN 20
WGHT    0.023500    3.232500
FVAR       0.24383
EU1   4    0.616441    0.232324    0.637526    11.00000    0.02445    0.03033 =
         0.02586    0.00093    0.01098   -0.00153
CL1   3    0.090365    0.010216    0.414010    11.00000    0.03792    0.12893 =
         0.09140   -0.05623    0.01855   -0.02688
CL2   3    0.871482    0.155458    0.408099    11.00000    0.05113    0.10357 =
         0.06571   -0.00577    0.03569   -0.00842
CL3   3    0.332644    0.685295    0.656129    11.00000    0.06124    0.05213 =
         0.08483    0.00510    0.03256    0.02302
CL4   3    0.927526    0.393204    0.472743    11.00000    0.08715    0.10382 =
         0.09408    0.02846    0.06651    0.03701
CL5   3    1.223655    0.365771    0.692881    11.00000    0.04129    0.09355 =
         0.04822   -0.00581    0.01584   -0.02776
CL6   3    0.634592    0.230031    0.944480    11.00000    0.08160    0.11498 =
         0.05287   -0.00997    0.04754   -0.01806
O1    6    0.461077    0.182055    0.585637    11.00000    0.02694    0.04653 =
         0.03409   -0.00458    0.00929   -0.00289
O2    6    0.632447    0.164867    0.548348    11.00000    0.02873    0.04594 =
         0.03255   -0.00926    0.01093   -0.00365
O3    6    0.536758    0.350032    0.659534    11.00000    0.04522    0.03347 =
         0.04692    0.00728    0.02549    0.00594
O4    6    0.633887    0.335155    0.571792    11.00000    0.08384    0.03093 =
         0.05458    0.00774    0.04697    0.00566
O5    6    0.788851    0.233152    0.641165    11.00000    0.02765    0.08076 =
         0.03148   -0.00790    0.01259   -0.00953
O6    6    0.713088    0.255795    0.737583    11.00000    0.02880    0.04475 =
         0.02912   -0.00545    0.01116   -0.00495
N1    5    0.659350    0.090960    0.683548    11.00000    0.03238    0.03260 =
         0.03517    0.00105    0.00786    0.00113
N2    5    0.518485    0.181773    0.715515    11.00000    0.03112    0.03545 =
         0.03233   -0.00043    0.01409   -0.00500
C1    1    0.445450    0.223453    0.728568    11.00000    0.03915    0.04585 =
         0.04715   -0.00001    0.02421   -0.00131
AFIX  43
H1    2    0.422889    0.270135    0.705868    11.00000   -1.20000
AFIX   0
C2    1    0.400276    0.201906    0.774063    11.00000    0.05966    0.06734 =
         0.06090   -0.00115    0.04172   -0.00325
AFIX  43
H2    2    0.348123    0.233003    0.781381    11.00000   -1.20000
AFIX   0
C3    1    0.433204    0.134796    0.807789    11.00000    0.07452    0.07881 =
         0.04834    0.00173    0.04238   -0.01287
AFIX  43
H3    2    0.404836    0.119825    0.839333    11.00000   -1.20000
AFIX   0
C4    1    0.509637    0.088180    0.795189    11.00000    0.06162    0.05563 =
         0.03633    0.00500    0.01779   -0.01599
C5    1    0.548212    0.017165    0.828407    11.00000    0.08695    0.06711 =
         0.04742    0.02231    0.02197   -0.01280
AFIX  43
H5    2    0.523040    0.000756    0.860950    11.00000   -1.20000
AFIX   0
C6    1    0.619392   -0.026169    0.813922    11.00000    0.08124    0.05045 =
         0.04853    0.02423   -0.00117   -0.01044
AFIX  43
H6    2    0.644048   -0.072276    0.836818    11.00000   -1.20000
AFIX   0
C7    1    0.659145   -0.003979    0.764187    11.00000    0.04721    0.03776 =
         0.04430    0.00702   -0.00428   -0.00480
C8    1    0.730766   -0.049890    0.745920    11.00000    0.05702    0.03542 =
         0.06852    0.00786   -0.00654    0.00354
AFIX  43
H8    2    0.756212   -0.097068    0.767072    11.00000   -1.20000
AFIX   0
C9    1    0.763171   -0.025759    0.697440    11.00000    0.04552    0.04494 =
         0.07809   -0.00895    0.00664    0.01394
AFIX  43
H9    2    0.809774   -0.056902    0.684121    11.00000   -1.20000
AFIX   0
C10   1    0.726646    0.045821    0.667476    11.00000    0.03946    0.04311 =
         0.05395   -0.00358    0.01304    0.00780
AFIX  43
H10   2    0.750872    0.062505    0.634627    11.00000   -1.20000
AFIX   0
C11   1    0.625258    0.066170    0.731342    11.00000    0.03563    0.03228 =
         0.03251   -0.00004    0.00287   -0.00723
C12   1    0.549583    0.113944    0.747497    11.00000    0.03789    0.03711 =
         0.02846    0.00095    0.01005   -0.00998
C13   1    0.261919    0.072403    0.484381    11.00000    0.03377    0.04499 =
         0.04997   -0.00682    0.01362   -0.00194
AFIX  43
H13   2    0.285260    0.069827    0.449272    11.00000   -1.20000
AFIX   0
C14   1    0.166580    0.046881    0.482693    11.00000    0.03181    0.04910 =
         0.06407   -0.01343    0.01068   -0.00737
C15   1    0.130042    0.050727    0.532827    11.00000    0.03423    0.07099 =
         0.07983   -0.00695    0.02197   -0.01701
AFIX  43
H15   2    0.064473    0.033792    0.530573    11.00000   -1.20000
AFIX   0
C16   1    0.190696    0.079688    0.586342    11.00000    0.04676    0.08995 =
         0.05662    0.00125    0.02459   -0.01808
AFIX  43
H16   2    0.167115    0.081620    0.621383    11.00000   -1.20000
AFIX   0
C17   1    0.286221    0.106063    0.589184    11.00000    0.03936    0.06211 =
         0.04422    0.00239    0.01318   -0.00947
AFIX  43
H17   2    0.326613    0.127022    0.625906    11.00000   -1.20000
AFIX   0
C18   1    0.322854    0.101938    0.538698    11.00000    0.02825    0.03453 =
         0.04452    0.00223    0.01061   -0.00277
C19   1    0.427204    0.130319    0.544021    11.00000    0.02860    0.03298 =
         0.03382    0.00666    0.00676   -0.00106
C20   1    0.478548    0.102292    0.503626    11.00000    0.03293    0.03406 =
         0.03829   -0.00711    0.01077   -0.00484
AFIX  43
H20   2    0.447177    0.064088    0.474344    11.00000   -1.20000
AFIX   0
C21   1    0.575154    0.128253    0.504376    11.00000    0.03190    0.02892 =
         0.03349    0.00294    0.01080    0.00501
C22   1    0.613162    0.115230    0.449112    11.00000    0.03576    0.03129 =
         0.03151    0.00086    0.01062    0.00621
C23   1    0.553752    0.085571    0.393999    11.00000    0.04347    0.04848 =
         0.03856   -0.00366    0.00783   -0.00178
AFIX  43
H23   2    0.487094    0.070675    0.390638    11.00000   -1.20000
AFIX   0
C24   1    0.592542    0.077965    0.344180    11.00000    0.06366    0.06506 =
         0.03187   -0.01218    0.00972   -0.00409
AFIX  43
H24   2    0.551777    0.058290    0.307107    11.00000   -1.20000
AFIX   0
C25   1    0.690188    0.098928    0.348409    11.00000    0.06769    0.06080 =
         0.03575   -0.00294    0.02457    0.00738
AFIX  43
H25   2    0.716718    0.093160    0.314718    11.00000   -1.20000
AFIX   0
C26   1    0.748190    0.128456    0.402815    11.00000    0.04428    0.05204 =
         0.04237    0.00222    0.01973    0.00484
C27   1    0.711058    0.136975    0.452980    11.00000    0.03515    0.04353 =
         0.03298   -0.00154    0.01031    0.00341
AFIX  43
H27   2    0.752100    0.157480    0.489673    11.00000   -1.20000
AFIX   0
C28   1    0.439802    0.550455    0.655903    11.00000    0.03926    0.03909 =
         0.04260   -0.00079    0.01880    0.00268
AFIX  43
H28   2    0.447302    0.568679    0.618292    11.00000   -1.20000
AFIX   0
C29   1    0.387316    0.595617    0.687621    11.00000    0.03718    0.03785 =
         0.05374   -0.00434    0.01647    0.00476
C30   1    0.375872    0.571289    0.743172    11.00000    0.04656    0.05808 =
         0.05116   -0.01188    0.02440    0.00376
AFIX  43
H30   2    0.340214    0.603157    0.764248    11.00000   -1.20000
AFIX   0
C31   1    0.417393    0.499697    0.767314    11.00000    0.04658    0.06199 =
         0.04077   -0.00340    0.01908   -0.00207
AFIX  43
H31   2    0.410441    0.482525    0.805306    11.00000   -1.20000
AFIX   0
C32   1    0.469422    0.452697    0.735996    11.00000    0.03902    0.04399 =
         0.03825   -0.00006    0.01454   -0.00050
AFIX  43
H32   2    0.496784    0.403483    0.752666    11.00000   -1.20000
AFIX   0
C33   1    0.481615    0.477716    0.679912    11.00000    0.03156    0.03745 =
         0.03695   -0.00363    0.01340   -0.00098
C34   1    0.536658    0.424187    0.646788    11.00000    0.03180    0.03644 =
         0.03287    0.00089    0.01148    0.00066
C35   1    0.584483    0.457418    0.605744    11.00000    0.04359    0.03094 =
         0.04139    0.00496    0.01969    0.00284
AFIX  43
H35   2    0.584693    0.513500    0.601411    11.00000   -1.20000
AFIX   0
C36   1    0.632109    0.410575    0.570807    11.00000    0.04296    0.03511 =
         0.03122    0.00674    0.01568    0.00270
C37   1    0.687152    0.449247    0.529773    11.00000    0.04621    0.03261 =
         0.03203    0.00171    0.01912   -0.00107
C38   1    0.659968    0.521837    0.501221    11.00000    0.05448    0.03481 =
         0.04519    0.00360    0.02319    0.00434
AFIX  43
H38   2    0.605523    0.550449    0.508020    11.00000   -1.20000
AFIX   0
C39   1    0.712659    0.552871    0.462463    11.00000    0.07762    0.03601 =
         0.05457    0.00980    0.03249    0.00024
AFIX  43
H39   2    0.691749    0.601271    0.441765    11.00000   -1.20000
AFIX   0
C40   1    0.795062    0.513652    0.453996    11.00000    0.07185    0.05132 =
         0.04872    0.00242    0.03754   -0.00888
AFIX  43
H40   2    0.831824    0.535506    0.428620    11.00000   -1.20000
AFIX   0
C41   1    0.822611    0.442061    0.483261    11.00000    0.05485    0.05396 =
         0.04518    0.00410    0.02933    0.00762
C42   1    0.768873    0.408061    0.519715    11.00000    0.05747    0.04389 =
         0.04039    0.01065    0.02677    0.01083
AFIX  43
H42   2    0.787081    0.357567    0.537659    11.00000   -1.20000
AFIX   0
C43   1    1.044734    0.295113    0.685553    11.00000    0.03159    0.05073 =
         0.02742   -0.00238    0.01122   -0.00374
AFIX  43
H43   2    1.050680    0.315435    0.724889    11.00000   -1.20000
AFIX   0
C44   1    1.119937    0.307279    0.657202    11.00000    0.02812    0.05057 =
         0.03508    0.00498    0.00963   -0.00431
C45   1    1.114780    0.276736    0.600511    11.00000    0.03963    0.06923 =
         0.04085    0.00093    0.02409   -0.00486
AFIX  43
H45   2    1.167218    0.285112    0.582209    11.00000   -1.20000
AFIX   0
C46   1    1.031367    0.233621    0.570990    11.00000    0.04814    0.07697 =
         0.03604   -0.01406    0.02221   -0.01136
AFIX  43
H46   2    1.026966    0.211940    0.532235    11.00000   -1.20000
AFIX   0
C47   1    0.954193    0.221840    0.597555    11.00000    0.03440    0.05958 =
         0.03668   -0.00728    0.01339   -0.00719
AFIX  43
H47   2    0.897133    0.192924    0.576588    11.00000   -1.20000
AFIX   0
C48   1    0.960202    0.252410    0.655083    11.00000    0.02896    0.04126 =
         0.02967    0.00257    0.01170    0.00010
C49   1    0.871525    0.241917    0.680409    11.00000    0.02766    0.04385 =
         0.03395   -0.00048    0.01216   -0.00362
C50   1    0.883833    0.242309    0.743221    11.00000    0.02716    0.05870 =
         0.03026    0.00160    0.00871   -0.00375
AFIX  43
H50   2    0.949036    0.240686    0.769348    11.00000   -1.20000
AFIX   0
C51   1    0.802662    0.245029    0.768819    11.00000    0.03427    0.03246 =
         0.03021   -0.00477    0.01318   -0.00678
C52   1    0.817825    0.236403    0.836256    11.00000    0.04081    0.03300 =
         0.02849   -0.00266    0.01298   -0.00860
C53   1    0.910863    0.225816    0.877582    11.00000    0.04327    0.03925 =
         0.03564   -0.00121    0.01056   -0.00668
AFIX  43
H53   2    0.968781    0.224758    0.863580    11.00000   -1.20000
AFIX   0
C54   1    0.919051    0.216843    0.938961    11.00000    0.06020    0.04069 =
         0.03384   -0.00029    0.00501   -0.00873
AFIX  43
H54   2    0.982253    0.209130    0.966532    11.00000   -1.20000
AFIX   0
C55   1    0.834026    0.219204    0.959969    11.00000    0.07789    0.04525 =
         0.02791   -0.00337    0.01638   -0.01604
AFIX  43
H55   2    0.839317    0.214261    1.001854    11.00000   -1.20000
AFIX   0
C56   1    0.742458    0.228784    0.919223    11.00000    0.06557    0.04988 =
         0.03678   -0.00761    0.02957   -0.01689
C57   1    0.732932    0.238017    0.857311    11.00000    0.04344    0.04843 =
         0.03246   -0.00461    0.01744   -0.00881
AFIX  43
H57   2    0.669455    0.245296    0.829943    11.00000   -1.20000
AFIX   0
HKLF 4


REM  1_a.res in P2(1)/n
REM R1 =  0.0270 for    8693 Fo > 4sig(Fo)  and  0.0377 for all   10366 data
REM    649 parameters refined using      0 restraints

END

WGHT      0.0225      3.3357

REM Highest difference peak  0.418,  deepest hole -0.556,  1-sigma level  0.067
Q1    1   0.8773  0.3522  0.4588  11.00000  0.05    0.42
Q2    1   1.1769  0.4039  0.6907  11.00000  0.05    0.38
Q3    1   0.1186 -0.0233  0.4459  11.00000  0.05    0.35
Q4    1   0.6765  0.3417  0.6018  11.00000  0.05    0.30
Q5    1   1.2300  0.3252  0.7221  11.00000  0.05    0.29
Q6    1   0.6564  0.1384  0.4496  11.00000  0.05    0.28
Q7    1   0.5188  0.4586  0.6695  11.00000  0.05    0.27
Q8    1   0.7776 -0.0996  0.6901  11.00000  0.05    0.26
Q9    1   0.9261  0.2397  0.6729  11.00000  0.05    0.26
Q10   1   0.6380  0.1720  0.9369  11.00000  0.05    0.25
Q11   1   0.7400  0.2411  0.8886  11.00000  0.05    0.25
Q12   1   0.4399  0.4966  0.6616  11.00000  0.05    0.24
Q13   1   0.5828  0.1402  0.4647  11.00000  0.05    0.24
Q14   1   0.5151  0.1324  0.5007  11.00000  0.05    0.24
Q15   1   0.9368  0.3948  0.5089  11.00000  0.05    0.24
Q16   1   0.7789  0.2308  0.8457  11.00000  0.05    0.23
Q17   1   0.6374  0.3030  0.9743  11.00000  0.05    0.23
Q18   1   0.2742  0.6691  0.6418  11.00000  0.05    0.23
Q19   1   0.7356  0.5196  0.4452  11.00000  0.05    0.23
Q20   1   0.8776  0.2042  0.9488  11.00000  0.05    0.23
;
_shelx_res_checksum   65815

_shelx_hkl_file
;
   2   0   0   19.20    1.00
   2   0   0   15.10    2.10
  -2   0   0   13.80    1.80
   2   0   0   17.30    1.00
   3   0   0    3.10    1.70
  -3   0   0    1.90    1.50
   3   0   0   -0.40    0.70
  -4   0   0 5849.51  141.49
  -4   0   0 5900.91  143.29
   5   0   0   -0.20    0.80
   5   0   0   -1.00    1.20
   5   0   0   -0.90    0.80
  -5   0   0    0.10    1.20
   6   0   0  942.41   25.40
  -6   0   0  945.71   25.20
   6   0   0  906.41   21.80
   7   0   0   -0.70    1.40
  -7   0   0    1.00    2.00
   7   0   0   -3.20    1.40
   8   0   0 1256.67   30.40
  -8   0   0 1306.37   34.40
   8   0   0 1290.87   34.60
   9   0   0   -0.40    2.10
   9   0   0   -0.50    1.60
  10   0   0   93.99    6.50
  10   0   0   88.89    8.10
  11   0   0    0.80    2.60
  11   0   0    1.70    3.10
  12   0   0  968.50   27.90
  12   0   0  977.20   31.50
  13   0   0    0.10    2.80
  14   0   0  208.08   13.70
  15   0   0    5.80    3.90
  15   0   0    6.30    4.00
  16   0   0   47.10    7.70
  -2  -1   0 5065.79  127.99
   2   1   0 5428.76  129.59
  -3  -1   0    1.30    1.30
   3  -1   0    2.00    1.90
  -3  -1   0   -0.70    0.90
  -3  -1   0   -0.10    1.00
   3   1   0    1.00    1.20
   3   1   0    1.70    1.40
   3   1   0   -0.10    1.10
   4  -1   0  220.28    8.90
  -4  -1   0  229.78    6.20
  -4  -1   0  238.68    6.30
   4   1   0  221.58    7.90
   4   1   0  232.28    7.40
   4   1   0  214.18    7.20
  -5  -1   0  310.47   10.70
   5  -1   0  317.97    7.50
   5  -1   0  293.47   11.50
   5  -1   0  311.47    7.70
  -5  -1   0  317.57    7.40
   5   1   0  305.27    9.50
   5   1   0  305.27    9.50
   5   1   0  317.67   10.70
   6  -1   0 2442.36   50.29
   6  -1   0 2346.27   56.19
  -6  -1   0 2504.25   54.99
   6   1   0 2412.56   52.79
   6   1   0 2410.66   54.59
   6   1   0 2428.96   52.79
   7  -1   0  234.88   11.30
  -7  -1   0  214.68   10.00
   7  -1   0  243.78    7.40
   7   1   0  216.38   10.00
   7   1   0  244.38    9.10
  -8  -1   0   86.09    6.70
   8  -1   0   78.89   12.80
   8  -1   0   75.19    4.30
   8   1   0   83.89    5.60
   8   1   0   79.69    6.40
   9  -1   0   47.40    3.90
  -9  -1   0   38.50    5.50
   9  -1   0   34.80    5.70
   9   1   0   42.20    4.60
  10  -1   0 1397.26   39.70
 -10  -1   0 1386.16   37.90
  10  -1   0 1425.06   33.70
  10   1   0 1365.96   35.60
  10   1   0 1390.16   38.00
  11  -1   0  126.99   10.30
  11  -1   0   94.39    6.60
  11   1   0  106.49    7.90
  11   1   0   99.19    8.60
  12  -1   0  123.59   10.50
  12  -1   0  109.89    7.60
  12   1   0  106.89    8.50
  12   1   0  112.09    9.50
  13  -1   0    2.80    3.60
  13  -1   0    1.90    2.90
  13   1   0    7.20    3.70
  13   1   0    4.90    3.90
  14  -1   0  100.59   10.30
  14  -1   0   87.69    7.90
  14   1   0  104.19    9.20
  15  -1   0   -3.00    3.50
  15   1   0    1.80    4.00
  16  -1   0  172.98   13.60
  16  -1   0  173.18   11.90
  16   1   0  181.88   13.10
   0  -2   0 3380.96   97.59
   0   2   0 3916.31   98.29
  -1  -2   0  140.09    5.10
   1   2   0  126.99    4.90
   1   2   0  139.79    5.20
  -2  -2   0   41.00    3.00
  -2  -2   0   38.90    3.00
   2   2   0   39.10    3.10
   2   2   0   42.00    3.10
  -3  -2   0   54.79    3.40
  -3  -2   0   56.99    3.40
  -3  -2   0   58.59    3.60
   3   2   0   58.59    3.70
   3   2   0   52.59    3.80
  -4  -2   0 2899.51   61.89
   4   2   0 2910.31   62.29
   4   2   0 2924.81   62.39
  -5  -2   0  121.69    4.90
  -5  -2   0  121.99    5.00
   5  -2   0  114.69    2.90
   5  -2   0  108.59    7.00
  -5  -2   0  123.79    6.00
   5   2   0  113.09    5.70
   5   2   0  115.79    5.90
  -6  -2   0    8.90    1.70
  -6  -2   0   12.90    2.80
  -6  -2   0    9.50    1.70
   6  -2   0    6.60    2.70
   6  -2   0    9.60    1.10
   6   2   0   12.00    2.60
   6   2   0   12.40    2.60
  -7  -2   0  683.33   20.00
  -7  -2   0  673.53   15.20
  -7  -2   0  689.73   15.70
   7  -2   0  602.84   22.30
   7  -2   0  697.23   15.50
   7   2   0  656.03   19.60
   7   2   0  672.93   19.40
   8  -2   0 1615.34   34.50
   8  -2   0 1565.64   42.40
  -8  -2   0 1597.44   39.70
   8   2   0 1560.74   38.70
   8   2   0 1566.14   39.30
   9  -2   0  132.59    9.70
  -9  -2   0  149.69    9.00
   9  -2   0  146.09    6.10
   9   2   0  149.59    8.50
  10  -2   0   84.39    5.10
  10  -2   0   90.29    8.80
 -10  -2   0   79.79    7.40
  10   2   0   95.39    7.50
  11  -2   0  186.38    8.50
  11  -2   0  189.88   13.10
 -11  -2   0  186.88   11.20
  11   2   0  189.58   11.00
  12  -2   0 1069.49   35.40
  12  -2   0 1094.99   28.30
  12   2   0 1056.89   32.60
  13  -2   0   52.89    8.50
  13  -2   0   54.59    5.60
  13   2   0   48.90    7.40
  14  -2   0  193.68   10.40
  14  -2   0  175.28   13.30
  14   2   0  173.28   12.30
  15  -2   0   14.20    4.20
  15  -2   0   -2.20    3.70
  15   2   0   -0.30    4.20
  16  -2   0  152.28   13.20
  16  -2   0  125.49   10.20
  16   2   0  122.89   11.80
   0  -3   0    1.60    1.50
   0  -3   0   -0.70    1.20
   0   3   0    1.80    1.50
   1  -3   0 3133.19   92.09
  -1  -3   0 2999.00   98.19
   1   3   0 3216.78  100.69
  -2  -3   0   46.20    3.90
  -2  -3   0   43.50    3.70
   2  -3   0   48.20    2.80
   2   3   0   46.90    3.90
   2   3   0   43.20    3.90
   3  -3   0   92.69    3.50
  -3  -3   0   92.09    5.00
  -3  -3   0  101.79    5.20
   3   3   0   90.89    5.20
   3   3   0  100.29    5.60
  -4  -3   0    1.90    1.50
  -4  -3   0    1.00    1.20
   4  -3   0   -0.20    0.60
  -4  -3   0    2.30    1.60
   4   3   0    0.80    1.70
   4   3   0    0.10    1.60
  -5  -3   0  559.84   15.50
   5  -3   0  553.44   12.40
  -5  -3   0  554.44   15.90
   5  -3   0  563.44   19.00
  -5  -3   0  560.64   15.60
   5   3   0  564.84   16.80
   5   3   0  558.34   16.90
   6  -3   0 1716.33   35.90
  -6  -3   0 1712.63   38.90
  -6  -3   0 1771.32   39.30
   6  -3   0 1654.93   44.20
  -6  -3   0 1758.52   40.70
   6   3   0 1748.53   41.70
   6   3   0 1782.62   41.70
  -7  -3   0  334.67   12.60
  -7  -3   0  360.56   10.80
   7  -3   0  348.67    8.80
  -7  -3   0  337.77   10.50
   7  -3   0  362.66   15.60
   7   3   0  331.37   13.10
   8  -3   0  129.19    9.60
  -8  -3   0  129.39    5.30
  -8  -3   0  116.19    5.00
  -8  -3   0  121.59    7.70
   8  -3   0  129.59    4.70
   8   3   0  115.39    7.70
   9  -3   0  345.27    9.90
  -9  -3   0  348.77   14.00
   9  -3   0  325.37   16.20
   9   3   0  334.87   14.20
  10  -3   0  694.63   17.70
  10  -3   0  656.23   25.30
 -10  -3   0  701.53   22.70
  10   3   0  683.53   22.90
  11  -3   0   -1.30    1.90
  11  -3   0   -0.10    4.00
 -11  -3   0   -2.90    2.80
  12  -3   0  140.09   11.90
 -12  -3   0  114.69    9.40
  12  -3   0  118.29    6.90
  12   3   0  126.19   10.10
  13  -3   0    3.40    2.70
  13  -3   0    2.10    3.90
  13   3   0   -3.30    3.30
  14  -3   0   55.39    6.30
  14  -3   0   47.60    8.60
  14   3   0   51.09    8.30
  15  -3   0    9.10    5.40
  15  -3   0    1.80    3.30
  15   3   0    3.20    4.80
  16  -3   0   98.69   12.00
  16  -3   0  105.19    8.60
  16   3   0   78.79   10.80
   0  -4   0 4639.54  137.59
   0   4   0 4635.34  138.29
  -1  -4   0 3730.83  124.29
   1  -4   0 3876.61  118.09
   1   4   0 4057.39  127.79
  -2  -4   0   12.30    2.60
   2  -4   0    8.40    1.80
  -2  -4   0   11.60    2.40
   2   4   0    8.30    2.50
   2   4   0   10.90    2.60
  -3  -4   0  637.64   17.90
   3  -4   0  615.84   15.40
  -3  -4   0  632.54   17.70
   3   4   0  603.94   18.10
   3   4   0  600.04   17.90
  -4  -4   0 2591.14   57.99
   4  -4   0 2515.15   54.49
  -4  -4   0 2635.54   57.89
   4   4   0 2679.93   58.99
   4   4   0 2616.34   59.09
   5  -4   0  118.49    4.50
  -5  -4   0  122.39    6.70
  -5  -4   0  136.29    6.90
  -5  -4   0  130.89    6.50
   5   4   0  113.59    7.20
  -6  -4   0   93.89    5.80
   6  -4   0   90.69    7.60
  -6  -4   0   86.29    5.60
   6  -4   0   89.39    3.70
  -6  -4   0   86.79    5.80
   6   4   0   80.69    6.30
   6   4   0   79.49    6.60
  -7  -4   0 1041.50   26.10
   7  -4   0 1035.70   22.90
   7  -4   0  981.40   31.40
  -7  -4   0 1052.09   27.60
  -7  -4   0 1079.79   26.40
   7   4   0  979.60   28.70
  -8  -4   0  713.43   19.20
  -8  -4   0  706.23   21.50
   8  -4   0  719.93   16.90
   8  -4   0  720.83   25.80
  -8  -4   0  688.43   18.90
   8   4   0  713.53   23.10
   9  -4   0   69.79    3.80
  -9  -4   0   68.09    4.40
  -9  -4   0   65.69    4.40
  -9  -4   0   72.49    6.40
   9  -4   0   57.99    8.10
   9   4   0   60.99    7.40
 -10  -4   0  328.87    8.50
  10  -4   0  320.37    9.90
 -10  -4   0  336.47   14.30
  10   4   0  290.47   17.50
 -11  -4   0  160.48   10.20
  11  -4   0  148.59    6.70
  11  -4   0  144.59   12.40
  11   4   0  162.28   11.00
 -12  -4   0  220.98   12.40
  12  -4   0  240.48   15.70
  12  -4   0  233.28    9.20
  12   4   0  232.08   14.00
  13  -4   0   31.40    6.90
  13  -4   0   27.30    4.00
  13   4   0   16.80    5.40
  14  -4   0  196.88   15.70
  14  -4   0  227.78   10.30
  14   4   0  218.28   14.60
  15  -4   0   93.69    7.30
  15  -4   0   77.59   11.10
  15   4   0   79.09   11.00
  16  -4   0   27.10    5.40
  16  -4   0   20.30    7.50
  16   4   0   35.40    8.10
   0  -5   0   -1.90    1.50
   0  -5   0   -0.10    1.70
  -1  -5   0  418.86   13.80
   1  -5   0  392.46   12.60
  -1  -5   0  398.36   13.30
   1   5   0  417.06   13.70
   2  -5   0 2081.69   46.50
  -2  -5   0 2061.79   48.10
  -2  -5   0 2174.18   48.80
   2   5   0 2114.19   48.80
   2   5   0 2037.10   48.70
  -3  -5   0    2.80    2.00
   3  -5   0   -0.50    1.20
  -3  -5   0   -0.70    1.50
   3   5   0    3.50    2.50
   3   5   0    1.00    1.80
   4  -5   0  461.35   12.90
  -4  -5   0  454.35   15.20
  -4  -5   0  461.05   15.50
   4   5   0  436.96   15.70
   4   5   0  471.35   16.30
  -5  -5   0  689.53   20.20
   5  -5   0  654.13   17.00
   5   5   0  694.03   21.70
   5   5   0  697.93   21.50
   6  -5   0 2359.26   50.39
  -6  -5   0 2396.56   54.49
   6  -5   0 2325.17   59.39
  -6  -5   0 2431.56   54.19
   6   5   0 2298.87   56.59
   7  -5   0  907.41   30.50
  -7  -5   0  961.70   25.60
  -7  -5   0  927.01   25.70
   7  -5   0  923.71   21.90
   7   5   0  957.00   28.50
  -8  -5   0  202.98    9.20
  -8  -5   0  215.68   10.20
   8  -5   0  216.78   13.50
   8  -5   0  195.68    6.90
  -8  -5   0  180.98    9.70
   8   5   0  207.78   11.60
  -9  -5   0  353.86   12.50
  -9  -5   0  376.86   14.80
   9  -5   0  375.96   10.80
  -9  -5   0  374.66   12.80
   9   5   0  356.16   16.50
 -10  -5   0  263.17    9.70
 -10  -5   0  269.87    9.70
 -10  -5   0  277.47   13.00
  10  -5   0  262.47   16.00
  10  -5   0  262.87    8.90
  10   5   0  274.87   14.60
 -11  -5   0  163.88    5.70
  11  -5   0  160.68    6.90
  11  -5   0  133.79   12.40
 -11  -5   0  161.88   10.30
 -11  -5   0  163.98    5.60
  11   5   0  159.78   12.00
 -12  -5   0   88.19    8.30
  12  -5   0   81.09    5.30
  12  -5   0   86.79   11.40
  12   5   0   83.19   10.30
  13  -5   0  462.35   14.90
  13  -5   0  496.55   24.30
  13   5   0  476.35   22.20
  14  -5   0  191.98    9.10
 -14  -5   0  179.58   11.60
  14  -5   0  210.48   16.60
  14   5   0  182.08   13.90
  15  -5   0    6.10    3.20
  15  -5   0   23.60    7.70
  15   5   0    5.70    5.50
  16  -5   0   15.40   14.00
  16  -5   0   38.80    5.50
  16   5   0   22.20    8.00
   0  -6   0 5863.21  184.98
   0   6   0 6062.39  187.78
  -1  -6   0  187.08    8.90
   1  -6   0  182.98    8.40
  -2  -6   0  127.89    7.50
   2  -6   0  139.79    6.90
  -2  -6   0  130.59    7.60
   2   6   0  131.49    8.00
   2   6   0  119.99    7.50
   3  -6   0 1404.26   33.90
  -3  -6   0 1413.56   36.60
  -3  -6   0 1470.25   36.40
   3   6   0 1407.36   37.00
   3   6   0 1437.36   37.00
   4  -6   0  409.66   12.80
  -4  -6   0  388.06   14.70
  -4  -6   0  443.66   15.60
   4   6   0  418.86   15.80
   4   6   0  375.96   15.50
   5  -6   0   89.99    5.20
  -5  -6   0   85.19    6.50
  -5  -6   0   86.19    6.70
   5   6   0   83.99    7.30
   6  -6   0  127.19    6.00
  -6  -6   0  147.69    8.40
  -6  -6   0  143.89    8.50
   6   6   0  127.29    9.10
   7  -6   0  280.77   15.60
  -7  -6   0  291.47   12.00
  -7  -6   0  291.37   12.30
   7  -6   0  266.77    9.30
  -7  -6   0  272.77   11.90
   8  -6   0  260.67    9.00
  -8  -6   0  276.77   11.90
  -8  -6   0  284.37   12.10
   8  -6   0  224.78   23.10
  -8  -6   0  264.47   11.90
   8   6   0  273.17   14.10
  -9  -6   0   64.39    6.60
   9  -6   0   59.49    9.50
  -9  -6   0   66.19    5.90
   9  -6   0   64.99    4.30
  -9  -6   0   63.09    6.00
   9   6   0   78.59    8.30
 -10  -6   0  165.38   10.00
  10  -6   0  161.68    6.90
 -10  -6   0  166.18    8.60
  10  -6   0  157.48   13.40
  10   6   0  149.69   11.50
 -11  -6   0  370.16   12.60
  11  -6   0  407.06   12.40
  11  -6   0  379.66   21.00
 -11  -6   0  399.56   16.60
 -11  -6   0  379.76   12.80
  11   6   0  371.06   18.90
  12  -6   0  456.05   13.70
 -12  -6   0  446.76   18.10
 -12  -6   0  429.46   10.90
 -12  -6   0  372.76   12.60
  12  -6   0  442.46   23.50
  12   6   0  456.55   21.30
  13  -6   0   -0.70    2.10
  13  -6   0    8.00    6.00
  13   6   0   -0.70    3.80
  14  -6   0  115.39   14.20
  14  -6   0  110.69    6.70
 -14  -6   0   95.79    9.10
  14   6   0  111.49   11.80
  15  -6   0  100.69   14.00
  15  -6   0  106.09    7.30
  15   6   0  108.49   13.50
   0  -7   0    0.80    1.80
   0  -7   0    1.80    2.30
   1  -7   0  596.84   18.70
  -1  -7   0  618.54   20.00
  -1  -7   0  601.04   19.40
  -2  -7   0  166.38    9.30
  -2  -7   0  182.98    9.90
   2  -7   0  164.78    8.30
   3  -7   0   75.49    5.70
  -3  -7   0   66.99    6.60
  -3  -7   0   69.19    6.40
   3   7   0   68.99    6.80
  -4  -7   0   18.60    4.10
  -4  -7   0   19.90    4.20
   4  -7   0   16.00    3.00
   4   7   0   17.00    4.20
   5  -7   0 1281.17   31.60
  -5  -7   0 1262.87   34.70
  -5  -7   0 1333.87   35.60
  -6  -7   0  929.51   27.90
  -6  -7   0  927.21   27.50
   6  -7   0  929.21   24.10
   6   7   0  943.71   29.70
   7  -7   0  433.06   13.40
  -7  -7   0  409.06   16.30
   7  -7   0  413.86   20.20
  -7  -7   0  451.15   17.20
   7   7   0  416.96   18.40
  -8  -7   0  108.89    9.40
  -8  -7   0  121.09    8.10
   8  -7   0  107.79    5.90
   8  -7   0   94.09   10.40
  -8  -7   0  111.69    8.30
   8   7   0  111.69    9.70
   9  -7   0  501.95   23.50
   9  -7   0  453.85   14.00
  -9  -7   0  460.45   17.40
  -9  -7   0  472.95   19.30
  -9  -7   0  470.35   17.20
   9   7   0  442.36   20.30
 -10  -7   0  671.43   21.50
 -10  -7   0  700.23   21.90
  10  -7   0  688.63   18.90
 -10  -7   0  698.93   23.30
  10  -7   0  696.83   29.50
  10   7   0  687.63   27.10
 -11  -7   0    6.80    3.20
  11  -7   0    5.10    2.50
  11  -7   0    8.30    5.80
 -11  -7   0   13.10    4.20
 -11  -7   0    2.10    2.60
  11   7   0   14.00    5.60
  12  -7   0   85.59    5.70
 -12  -7   0   80.09    5.80
 -12  -7   0   78.79   11.60
 -12  -7   0   88.49    6.00
  12  -7   0   71.79   11.80
  12   7   0   97.09   12.10
  13  -7   0  216.38   17.50
  13  -7   0  218.88    9.40
 -13  -7   0  221.48   14.30
  13   7   0  206.38   15.30
 -14  -7   0   83.79    8.70
  14  -7   0  108.39   14.40
  14  -7   0   90.49    6.60
  14   7   0   86.39   12.50
  15  -7   0   10.60    7.00
 -15  -7   0   -1.50    3.30
  15  -7   0    3.00    2.90
  15   7   0   11.60    6.90
   0  -8   0 1843.42   45.40
   0  -8   0 1794.92   45.90
   1  -8   0  896.41   26.30
  -1  -8   0  847.12   25.90
  -1  -8   0  885.11   26.90
   1  -8   0  865.71   25.40
   2  -8   0   14.50    3.60
  -2  -8   0   11.80    3.40
  -2  -8   0   11.00    3.50
  -3  -8   0 1311.87   36.30
  -3  -8   0 1308.07   36.40
   3  -8   0 1273.77   33.40
   4  -8   0  346.57   13.10
  -4  -8   0  340.27   15.10
  -4  -8   0  336.77   15.20
   4   8   0  313.87   15.40
  -5  -8   0  314.57   14.40
  -5  -8   0  344.87   15.20
   5  -8   0  323.57   12.40
   5   8   0  322.57   15.70
   6  -8   0  716.03   20.80
  -6  -8   0  692.93   23.60
  -6  -8   0  744.53   24.60
   6   8   0  730.83   26.10
   7  -8   0  384.06   13.30
  -7  -8   0  391.26   16.30
  -7  -8   0  358.16   16.40
   7   8   0  385.36   18.20
   8  -8   0  145.19   13.10
   8  -8   0  164.58    8.10
  -8  -8   0  145.59   10.20
  -8  -8   0  152.78    9.90
  -8  -8   0  156.58    9.70
   8   8   0  154.58   12.00
  -9  -8   0    2.80    3.00
   9  -8   0    4.30    2.30
  -9  -8   0   -0.80    2.40
   9  -8   0   -4.00    3.90
  -9  -8   0    1.50    3.20
   9   8   0   -0.20    3.70
  10  -8   0  304.17   19.40
  10  -8   0  281.47   10.90
 -10  -8   0  300.07   13.70
 -10  -8   0  270.37   13.70
 -10  -8   0  286.87   13.60
  10   8   0  300.67   17.30
 -11  -8   0  129.09    8.80
 -11  -8   0  142.39    9.10
  11  -8   0  125.89    7.10
  11  -8   0  117.89   14.50
  11   8   0  119.69   11.70
 -12  -8   0  124.69   10.50
 -12  -8   0  136.99    8.50
  12  -8   0  124.09   12.90
 -12  -8   0  114.39    7.90
  12  -8   0  126.49    7.20
  12   8   0  128.49   13.00
 -13  -8   0    4.20    2.30
  13  -8   0    8.40    6.00
 -13  -8   0    2.60    3.40
 -13  -8   0    2.10    2.30
  13  -8   0    0.60    2.60
  13   8   0    2.00    4.50
 -14  -8   0   -5.00    3.30
  14  -8   0    6.10    6.90
  14  -8   0    2.70    2.90
  14   8   0    0.60    4.70
  15  -8   0  142.39    8.70
  15  -8   0  157.48   17.00
 -15  -8   0  180.88   11.80
   0  -9   0   -0.50    2.20
   0  -9   0   -4.00    2.20
   1  -9   0 1802.02   45.60
  -1  -9   0 1756.32   45.80
  -1  -9   0 1589.94   48.70
   1  -9   0 1779.52   44.50
   2  -9   0   13.00    3.60
  -2  -9   0    2.70    3.30
  -2  -9   0    2.30    3.10
  -3  -9   0  765.82   25.30
   3  -9   0  773.22   23.60
   4  -9   0   30.70    4.80
  -4  -9   0   35.90    6.20
  -4  -9   0   34.70    6.00
   4   9   0   30.10    6.10
   5  -9   0  448.56   15.80
  -5  -9   0  415.26   17.70
  -5  -9   0  439.36   18.50
   5   9   0  425.16   19.30
  -6  -9   0    2.10    3.70
   6  -9   0    6.80    2.90
  -6  -9   0    2.10    3.40
   6   9   0   -1.60    3.30
  -7  -9   0  115.59    9.90
   7  -9   0  106.89    7.20
  -7  -9   0  114.19    9.20
   7   9   0   98.29   10.00
  -8  -9   0  470.65   19.30
   8  -9   0  444.36   23.40
   8  -9   0  472.45   16.10
  -8  -9   0  464.25   19.20
   8   9   0  494.65   22.30
  -9  -9   0  153.88   10.50
  -9  -9   0  169.28   11.00
   9  -9   0  160.98    8.60
   9  -9   0  170.48   14.80
   9   9   0  164.08   13.30
 -10  -9   0  160.38   10.80
  10  -9   0  160.58    8.60
 -10  -9   0  137.29   10.30
 -10  -9   0  161.78   11.20
  10  -9   0  161.18   14.90
  10   9   0  146.49   13.20
  11  -9   0   74.39   12.20
 -11  -9   0   55.59    7.40
 -11  -9   0   64.89    7.70
 -11  -9   0   48.40    7.00
  11  -9   0   54.99    5.70
  11   9   0   67.79   10.80
  12  -9   0    2.40    2.60
 -12  -9   0   -4.50    3.00
 -12  -9   0    2.90    3.40
 -12  -9   0    2.20    3.30
  12   9   0    6.40    5.50
 -13  -9   0  235.98   11.20
  13  -9   0  247.88   11.00
 -13  -9   0  243.48   14.00
  13  -9   0  256.27   20.00
  13   9   0  226.38   17.50
  14  -9   0    3.10    2.90
 -14  -9   0    1.30    2.20
 -14  -9   0    1.00    3.50
 -14  -9   0    1.10    2.20
  14  -9   0    3.60    7.30
  15  -9   0    8.20    3.60
 -15  -9   0    8.50    4.50
  15   9   0   -3.10    7.10
   0 -10   0  497.05   23.30
   0 -10   0  497.05   19.30
  -1 -10   0 2294.47   56.89
  -1 -10   0 2156.08   55.09
   1 -10   0 2132.89   54.29
   1 -10   0 2151.38   60.29
   2 -10   0  236.08   12.80
   2 -10   0  206.18   12.10
  -2 -10   0  254.97   14.00
  -2 -10   0  237.08   13.10
  -3 -10   0  265.17   13.90
   3 -10   0  242.48   14.50
  -3 -10   0  265.07   14.40
   4 -10   0   55.59    6.90
  -4 -10   0   48.70    7.50
  -4 -10   0   54.19    7.40
  -5 -10   0  208.28   13.10
   5 -10   0  214.08   11.20
  -5 -10   0  229.38   13.20
   5  10   0  205.88   13.80
  -6 -10   0   70.99    8.90
   6 -10   0   60.89    6.20
  -6 -10   0   73.49    8.80
   6  10   0   59.49    8.90
   7 -10   0  292.67   13.10
  -7 -10   0  298.57   15.90
  -7 -10   0  317.97   16.00
   7  10   0  306.17   17.70
  -8 -10   0  295.27   15.60
   8 -10   0  294.27   19.40
  -8 -10   0  286.67   15.10
   8 -10   0  272.17   12.40
   8  10   0  265.87   17.00
  -9 -10   0  123.79   10.50
  -9 -10   0  100.09    9.10
   9 -10   0  106.89    7.60
  -9 -10   0  112.49   10.10
   9 -10   0  113.79   14.40
   9  10   0  100.39   12.30
  10 -10   0   20.70    7.00
 -10 -10   0   22.10    5.60
  10 -10   0   21.30    4.30
 -10 -10   0   26.20    5.80
 -10 -10   0   23.40    5.20
  10  10   0   11.40    5.80
 -11 -10   0  414.06   18.30
  11 -10   0  410.66   15.60
  11 -10   0  418.26   25.40
 -11 -10   0  405.76   18.20
 -11 -10   0  442.06   18.90
  11  10   0  432.16   23.40
  12 -10   0  199.08   10.30
 -12 -10   0  176.28   11.70
 -12 -10   0  196.38   12.70
 -12 -10   0  203.58   12.30
  12 -10   0  235.78   19.90
  12  10   0  172.68   15.50
 -13 -10   0    1.90    3.50
  13 -10   0   14.30    6.80
  13 -10   0   -0.80    2.80
 -13 -10   0   -2.10    3.50
 -14 -10   0    6.60    4.30
 -14 -10   0    8.20    3.40
  14 -10   0    5.40    3.30
  14  10   0   11.80    5.80
   0 -11   0    2.00    3.10
   0 -11   0   -1.40    3.10
  -1 -11   0  108.19    9.80
  -1 -11   0  126.69    9.90
   1 -11   0   99.29    9.00
   1 -11   0  101.19    8.80
   2 -11   0  244.98   13.10
  -2 -11   0  253.37   14.20
   2 -11   0  226.18   13.40
  -2 -11   0  239.88   13.60
  -3 -11   0  707.13   26.30
   3 -11   0  701.23   23.90
  -3 -11   0  696.33   25.40
  -4 -11   0   55.39    8.10
  -4 -11   0   48.20    7.90
   4 -11   0   45.10    6.60
  -5 -11   0  984.60   32.30
  -5 -11   0  973.00   33.00
   5 -11   0  993.70   29.80
   6 -11   0   84.39    7.80
  -6 -11   0   75.79    9.60
  -6 -11   0   78.29   10.30
   6  11   0   72.69   10.20
  -7 -11   0   92.59    9.70
   7 -11   0   77.19    7.70
  -7 -11   0   76.99   10.10
   7  11   0   83.39   11.30
  -8 -11   0   -1.50    3.40
  -8 -11   0   -1.60    4.60
   8 -11   0   -0.80    3.10
   8  11   0   -5.30    4.40
   9 -11   0  658.33   25.00
   9 -11   0  608.84   30.40
  -9 -11   0  684.43   26.30
  -9 -11   0  661.73   25.30
   9  11   0  678.53   29.60
 -10 -11   0   31.90    7.10
 -10 -11   0   33.50    6.50
 -10 -11   0   46.40    7.90
  10 -11   0   22.60    8.20
  10 -11   0   42.30    7.00
  10  11   0   40.10    9.20
  11 -11   0    6.90    6.90
 -11 -11   0   36.50    6.70
 -11 -11   0   30.20    6.60
  11 -11   0   29.50    5.40
 -11 -11   0   28.40    6.80
  11  11   0   28.50    8.40
  12 -11   0   22.70    4.80
 -12 -11   0   12.00    4.90
 -12 -11   0   14.50    5.60
  12 -11   0   12.20    8.40
 -12 -11   0   19.30    5.60
 -13 -11   0   84.19    9.00
 -13 -11   0   61.19    7.90
 -13 -11   0   81.59    9.10
  13 -11   0   68.99    7.60
  13  11   0   96.29   14.20
 -14 -11   0   -2.00    4.30
  14 -11   0   -4.60    3.10
 -14 -11   0   -1.30    3.70
  14  11   0    6.70    7.10
   0 -12   0  210.08   13.70
   0 -12   0  206.18   13.00
  -1 -12   0 1372.06   41.10
   1 -12   0 1257.97   39.60
  -1 -12   0 1336.77   39.50
   1 -12   0 1288.97   38.50
   2 -12   0   -0.90    3.70
   2 -12   0    0.60    3.10
  -2 -12   0    1.70    3.50
  -2 -12   0   -0.60    3.40
   3 -12   0  476.95   19.50
  -3 -12   0  451.95   20.40
   3 -12   0  465.55   20.30
  -3 -12   0  457.25   21.30
   4 -12   0  161.48   11.30
  -4 -12   0  142.39   12.20
  -4 -12   0  159.48   12.20
  -5 -12   0  287.37   16.80
  -5 -12   0  252.37   15.50
   5 -12   0  263.27   13.80
  -6 -12   0   34.80    7.80
   6 -12   0   48.00    6.90
  -6 -12   0   53.29    8.50
  -7 -12   0  824.12   31.30
   7 -12   0  842.32   27.20
  -7 -12   0  847.32   30.60
  -8 -12   0   90.19   11.30
   8 -12   0   93.99    8.50
  -8 -12   0   96.49   11.40
   8  12   0   91.39   12.60
  -9 -12   0   43.00    8.20
   9 -12   0   29.70    5.60
  -9 -12   0   41.80    8.00
   9  12   0   32.80    8.60
 -10 -12   0   22.70    6.30
  10 -12   0   12.40    7.30
  10 -12   0   16.80    4.70
 -10 -12   0   15.90    6.20
 -10 -12   0    8.20    4.50
  10  12   0   23.60    7.90
  11 -12   0  175.68   17.80
 -11 -12   0  197.28   14.30
 -11 -12   0  189.28   13.30
  11 -12   0  192.78   11.30
  12 -12   0   37.80    6.40
 -12 -12   0   41.40    7.40
 -12 -12   0   27.30    6.50
 -12 -12   0   46.90    8.90
  12  12   0   50.19   10.60
  13 -12   0   -5.40    3.00
 -13 -12   0   -8.20    4.10
 -13 -12   0    2.20    4.10
 -13 -12   0   -7.90    3.90
  13  12   0   -2.90    5.10
   0 -13   0    3.00    4.30
   0 -13   0   -0.50    3.70
  -1 -13   0   89.99    9.60
   1 -13   0   82.09    9.80
  -1 -13   0   97.09   10.40
   1 -13   0   89.09   10.80
  -2 -13   0   22.30    6.50
   2 -13   0   27.60    6.60
  -2 -13   0    8.80    4.20
   2 -13   0   28.70    6.10
  -3 -13   0  328.47   18.60
  -3 -13   0  352.26   17.90
   3 -13   0  331.87   16.80
   3 -13   0  371.46   18.60
  -4 -13   0   -3.60    3.60
  -4 -13   0   -3.30    4.10
   4 -13   0    0.20    3.60
   4 -13   0    0.60    3.40
  -5 -13   0  308.77   17.50
  -5 -13   0  287.27   17.70
   5 -13   0  295.67   15.40
   6 -13   0   30.90    6.20
  -6 -13   0   19.80    6.80
  -6 -13   0   27.00    7.00
   7 -13   0  198.58   12.70
  -7 -13   0  193.68   14.40
  -7 -13   0  199.38   15.10
  -8 -13   0    8.10    5.50
  -8 -13   0    9.00    5.30
   8 -13   0   13.70    4.80
  -9 -13   0  168.78   13.80
  -9 -13   0  170.98   13.70
   9 -13   0  174.88   11.40
   9 -13   0  177.48   17.10
  10 -13   0   15.00    7.30
 -10 -13   0    6.00    4.40
 -10 -13   0   14.30    6.80
 -10 -13   0    2.90    5.70
  10 -13   0    5.70    4.20
  10  13   0   -5.10    4.70
 -11 -13   0    3.40    4.80
 -11 -13   0   14.90    5.50
  11 -13   0   11.70    4.50
 -11 -13   0   15.10    6.00
  11  13   0    6.20    6.90
  12 -13   0    2.00    3.90
 -12 -13   0    7.30    6.70
 -12 -13   0    1.70    4.30
 -12 -13   0   11.10    5.10
  12  13   0   11.90    7.70
 -13 -13   0   55.39    8.40
  13 -13   0   47.50    7.10
 -13 -13   0   45.10    8.20
 -13 -13   0   55.89    8.70
   0 -14   0   39.60    7.60
   0 -14   0   40.00    8.30
  -1 -14   0  525.95   23.20
   1 -14   0  526.15   22.40
  -1 -14   0  510.05   23.60
   1 -14   0  477.15   23.00
  -2 -14   0    5.30    4.80
   2 -14   0   -2.60    3.80
  -2 -14   0    2.80    4.50
   2 -14   0    2.70    4.30
   3 -14   0  510.05   23.30
  -3 -14   0  520.45   23.60
   3 -14   0  515.55   22.20
  -3 -14   0  507.15   24.30
   4 -14   0    2.50    3.90
   4 -14   0    7.10    5.10
  -4 -14   0    7.50    5.10
  -4 -14   0    9.50    5.70
  -5 -14   0  365.06   20.80
   5 -14   0  371.76   18.60
  -5 -14   0  373.46   20.30
   5 -14   0  384.86   19.90
  -6 -14   0   36.80    8.20
  -6 -14   0   62.29   10.50
   6 -14   0   38.40    7.40
   7 -14   0  251.17   14.70
  -7 -14   0  238.88   16.20
  -8 -14   0    8.20    5.70
  -8 -14   0    1.50    4.70
   8 -14   0   14.00    5.10
   9 -14   0   13.00    4.80
  -9 -14   0   24.00    7.00
  -9 -14   0   18.70    6.60
  10 -14   0    5.80    4.30
 -10 -14   0   10.10    5.30
  11 -14   0   90.89    9.50
 -11 -14   0   99.89   11.00
 -11 -14   0   96.19   11.90
  12 -14   0    0.00    4.00
 -12 -14   0   -6.20    4.40
 -12 -14   0   -2.80    4.10
   0 -15   0    0.40    4.20
   0 -15   0   -6.30    4.10
  -1 -15   0  178.08   14.00
   1 -15   0  180.98   14.70
   1 -15   0  180.58   13.90
  -2 -15   0   -5.10    4.10
   2 -15   0    2.20    4.80
   2 -15   0    1.90    4.60
   3 -15   0   63.19    9.40
   3 -15   0   84.19   11.30
  -3 -15   0   62.29   10.00
  -4 -15   0    7.20    5.70
  -4 -15   0   14.70    5.70
   4 -15   0    9.80    5.20
   4 -15   0   16.00    5.80
  -5 -15   0  280.37   18.10
   5 -15   0  266.67   16.10
   5 -15   0  327.87   18.90
   6 -15   0    2.90    4.70
  -6 -15   0   -9.70    3.50
   6 -15   0    1.40    4.10
   7 -15   0  101.49   10.60
   7 -15   0  126.19   12.60
  -7 -15   0   87.79   11.90
  -8 -15   0   -1.20    5.70
   8 -15   0    1.80    4.00
  -9 -15   0  129.09   15.30
   9 -15   0  136.69   11.50
 -10 -15   0   15.40    7.90
 -10 -15   0   16.20    7.20
  10 -15   0   16.60    6.20
  11 -15   0    5.00    4.90
 -11 -15   0   19.10    6.60
 -11 -15   0   -4.60    8.50
 -11 -15   0    7.70    5.70
   0 -16   0   15.70    5.60
   0 -16   0   10.60    6.00
   1 -16   0  176.18   14.00
  -1 -16   0  115.79   12.40
   1 -16   0  176.38   15.20
  -2 -16   0    7.30    5.50
   2 -16   0   12.70    5.70
   2 -16   0   12.50    7.60
   3 -16   0  226.38   15.70
  -3 -16   0  237.68   16.80
  -4 -16   0   30.80    7.70
   4 -16   0   27.50    7.10
  -5 -16   0   93.19   13.00
   5 -16   0   97.09   11.70
  -6 -16   0    5.20    6.20
   6 -16   0    2.40    4.30
  -7 -16   0  353.56   21.10
   7 -16   0  336.67   18.40
   8 -16   0   32.80    7.60
  -8 -16   0   29.80    8.20
   9 -16   0   39.00    7.70
   9 -16   0   36.50    9.80
  -9 -16   0   14.70    7.20
 -10 -16   0    2.30    6.60
  10 -16   0   -7.80    5.70
  10 -16   0    3.70    4.80
   0 -17   0    4.20    5.30
   0 -17   0    0.50    3.70
   1 -17   0  203.78   16.00
   1 -17   0  189.08   16.80
   2 -17   0    7.80    6.40
   2 -17   0    8.60    5.90
   3 -17   0   34.70    8.70
  -3 -17   0   53.79    9.30
   3 -17   0   54.69    9.40
   4 -17   0    7.80    5.30
   4 -17   0    0.00    5.60
  -4 -17   0   -3.50    4.30
  -5 -17   0  253.07   18.20
   5 -17   0  233.38   16.40
   5 -17   0  235.98   17.80
   6 -17   0   90.89   13.10
   6 -17   0   73.29   10.60
  -6 -17   0  107.49   13.40
   7 -17   0   38.60    8.80
  -7 -17   0   65.89   11.20
   7 -17   0   74.69   10.30
   8 -17   0   -8.30    4.10
  -8 -17   0   -2.30    5.20
   8 -17   0   10.40    6.00
   9 -17   0  176.38   14.20
  -9 -17   0  141.19   14.90
   9 -17   0  175.98   16.40
   0 -18   0   65.59   11.50
  -1 -18   0  194.78   16.40
   1 -18   0  205.18   16.60
   2 -18   0    1.20    5.00
  -2 -18   0   -5.90    4.50
   3 -18   0  171.78   18.00
  -3 -18   0  168.88   15.60
  -4 -18   0   85.49   12.70
  -5 -18   0   33.30    8.70
  -6 -18   0    7.30    6.10
  -7 -18   0  182.58   16.80
  -8 -18   0    7.80    6.60
   0 -19   0   -9.20    4.60
  -1 -19   0  121.49   15.10
   1 -19   0  110.99   14.50
  -2 -19   0   33.40    8.80
   2 -19   0   46.70    9.80
   3 -19   0   12.40    6.60
  -3 -19   0    9.60    6.20
  -4 -19   0   -4.30    5.50
   4 -19   0    9.20    6.50
   5 -19   0  154.48   15.20
  -5 -19   0  176.38   16.80
  -6 -19   0   55.99   11.50
   6 -19   0   48.10   10.10
   0 -20   0   36.90    9.50
   1 -20   0   41.60    9.70
  -1 -20   0   37.20    9.50
   2 -20   0    7.50    5.60
  -2 -20   0   -0.40    5.40
   3 -20   0   26.30    8.60
  -3 -20   0   27.50    8.80
   4 -20   0   72.59   12.40
  16   0  -1    2.70    4.30
  15   0  -1  180.48   12.20
  15   0  -1  139.59   10.80
  14   0  -1   -6.00    3.50
  14   0  -1   -0.90    3.20
  13   0  -1  186.78   12.00
  13   0  -1  202.48   11.20
  12   0  -1    2.10    3.50
  12   0  -1   -2.40    3.10
  11   0  -1  600.34   19.50
  11   0  -1  608.54   21.70
  10   0  -1    0.20    2.20
  10   0  -1    0.50    2.70
   9   0  -1  557.64   19.10
   9   0  -1  544.95   16.70
   8   0  -1   -0.20    1.90
   8   0  -1   -0.60    1.60
   7   0  -1  369.86   11.60
   7   0  -1  375.96   13.60
   6   0  -1    0.40    1.70
   6   0  -1    0.20    1.30
   5   0  -1  565.04   14.00
  -5   0   1  532.75   15.20
   5   0  -1  533.65   15.40
  -4   0   1    1.70    1.10
   4   0  -1    0.80    1.10
  -4   0   1    1.60    0.60
  -4   0   1   -0.50    0.50
   4   0  -1    0.50    0.90
   3   0  -1    2.20    1.30
  -3   0   1    4.60    1.10
   3   0  -1    4.20    1.30
   2   0  -1    0.10    0.50
   2   0  -1    0.90    0.70
  -2   0  -1    0.50    1.20
   2   0   1   -0.50    1.10
   3   0   1 1109.49   27.10
   3   0   1 1154.08   23.20
   3   0   1 1129.09   23.20
  -3   0  -1 1156.48   27.20
   4   0   1   -0.30    0.50
  -4   0  -1    0.30    1.30
   4   0   1    0.60    1.50
   5   0   1  125.89    4.30
   5   0   1  132.99    7.20
   5   0   1  125.09    4.20
  -5   0  -1  118.79    6.80
   6   0   1    2.10    1.20
   6   0   1   -1.40    1.60
   6   0   1    1.30    1.10
  -6   0  -1   -0.30    1.90
   7   0   1 1429.56   38.00
   7   0   1 1492.35   32.80
   7   0   1 1493.15   32.90
  -7   0  -1 1424.16   37.70
   8   0   1   -1.10    1.30
   8   0   1   -0.20    2.30
   8   0   1   -1.80    1.10
  -8   0  -1   -1.20    2.20
   9   0   1   13.00    4.00
  -9   0  -1    9.70    3.90
   9   0   1   15.60    2.90
  10   0   1    2.70    3.10
  10   0   1   -2.90    1.90
  11   0   1  416.16   14.90
  11   0   1  433.16   18.90
  12   0   1    4.70    4.20
  12   0   1    0.50    2.50
  13   0   1  165.18    9.90
  13   0   1  149.19   11.90
  14   0   1   -1.10    2.70
  14   0   1    2.50    3.90
  15   0   1   75.69    9.80
  15   0   1   77.79    9.10
  16   0   1    1.40    3.70
  16  -1  -1    7.70    4.60
  16  -1  -1    0.60    4.00
  16   1  -1    3.80    4.40
  15  -1  -1  207.88   13.70
  15  -1  -1  217.58   12.40
  15   1  -1  191.18   13.10
  14  -1  -1   24.10    5.00
  14  -1  -1   20.50    5.80
  14   1  -1   19.90    5.40
  13  -1  -1   69.79    6.70
  13  -1  -1   58.69    8.20
  12  -1  -1    5.50    3.30
  12  -1  -1    0.20    3.40
  12   1  -1   -5.20    3.10
  12   1  -1   -0.10    3.00
  11  -1  -1  624.84   22.80
  11  -1  -1  601.84   18.70
  11   1  -1  609.74   20.40
  11   1  -1  555.64   20.30
  10  -1  -1  118.59    6.80
  10  -1  -1  117.09    9.10
  10   1  -1  101.19   13.00
  10   1  -1  118.59    7.80
   9  -1  -1  276.67   13.20
   9  -1  -1  293.07   10.40
   9   1  -1  290.57   11.70
   9   1  -1  301.27   12.60
   8  -1  -1  710.93   18.00
   8  -1  -1  648.14   21.50
  -8  -1   1  694.13   20.30
   8   1  -1  672.63   19.50
   8   1  -1  660.93   20.20
  -7  -1   1 2163.38   50.19
   7  -1  -1 2180.98   52.19
   7  -1  -1 2270.37   47.70
   7   1  -1 2189.78   49.60
   7   1  -1 2214.18   50.39
  -6  -1   1  651.03   18.10
  -6  -1   1  665.33   15.00
  -6  -1   1  675.83   15.00
   6  -1  -1  667.93   16.10
   6  -1  -1  647.24   19.50
   6   1  -1  635.94   18.00
   6   1  -1  650.93   17.70
  -5  -1   1  241.78    7.00
   5  -1  -1  226.28    9.20
  -5  -1   1  232.08    6.80
   5  -1  -1  241.68    6.80
   5   1  -1  227.38    8.10
   5   1  -1  218.88    8.00
  -4  -1   1  175.78    6.10
  -4  -1   1  176.88    5.80
  -4  -1   1  170.48    5.60
   4  -1  -1  167.28    5.00
   4   1  -1  167.98    6.30
   4   1  -1  163.68    5.90
   3  -1  -1 1440.36   28.80
  -3  -1   1 1353.26   29.70
  -3  -1   1 1373.96   30.00
  -3  -1   1 1360.36   29.30
   3   1  -1 1318.57   29.50
   3   1  -1 1394.26   30.30
  -2  -1   1  237.88    5.80
  -2  -1   1  223.88    6.70
   2  -1  -1  250.87    6.10
  -2   1   1  245.68    5.80
   2   1  -1  237.18    7.00
  -1   1  -1 3219.78   70.79
   1   1   1 3032.40   90.09
   2  -1   1  409.16   11.80
  -2  -1  -1  396.36    9.70
  -2  -1  -1  399.06    9.50
   2   1   1  369.36   10.70
  -2   1  -1  404.56   11.70
   2   1   1  403.46    9.80
   2   1   1  407.36   10.10
  -3  -1  -1 1966.20   43.00
   3  -1   1 1954.80   44.20
  -3   1  -1 1955.00   44.00
   3   1   1 1956.70   41.10
   3   1   1 1945.71   42.90
   3   1   1 1926.21   41.20
  -4  -1  -1   12.90    1.30
   4  -1   1   14.90    2.90
  -4  -1  -1   12.50    0.90
  -4  -1  -1   15.00    2.60
  -4   1  -1   15.70    2.90
   4   1   1   12.10    1.70
   4   1   1   15.70    2.60
   4   1   1   11.60    1.70
  -5  -1  -1 2990.80   65.09
   5  -1   1 2926.61   66.29
   5   1   1 2964.20   61.79
   5   1   1 3004.00   64.99
   5   1   1 2869.01   61.99
  -5   1  -1 2892.41   65.89
   6  -1   1   40.60    2.10
   6  -1   1   35.60    4.90
   6  -1   1   39.40    1.80
  -6  -1  -1   42.60    4.60
   6   1   1   43.40    4.80
  -6   1  -1   35.30    4.90
   6   1   1   34.70    3.10
   6   1   1   39.60    3.40
  -7  -1  -1   59.79    5.80
   7  -1   1   49.60    6.40
   7  -1   1   54.89    2.90
   7  -1   1   60.09    3.00
   7   1   1   57.79    5.60
  -7   1  -1   65.49    6.40
   7   1   1   54.29    4.30
   7   1   1   60.09    4.20
   8  -1   1   27.60    2.60
  -8  -1  -1   31.70    5.20
   8  -1   1   42.50    6.20
   8   1   1   37.00    3.80
   8   1   1   30.00    3.80
   8   1   1   34.40    6.50
   9  -1   1  772.12   26.20
   9  -1   1  772.42   19.60
  -9  -1  -1  791.42   25.10
   9   1   1  772.62   21.80
   9   1   1  767.62   24.80
  10  -1   1    2.80    2.10
 -10  -1  -1   15.20    4.30
  10  -1   1    9.60    4.10
  10   1   1    7.80    3.10
  10   1   1    7.90    3.70
 -11  -1  -1  111.89    9.60
  11  -1   1  118.99    7.00
  11  -1   1  114.19   10.10
  11   1   1  112.19    7.90
  11   1   1  120.69    9.70
  12  -1   1    2.10    2.60
  12  -1   1    0.90    3.90
  12   1   1   -1.30    3.50
  12   1   1    7.80    3.70
  13  -1   1  370.46   18.70
  13  -1   1  350.06   14.10
  13   1   1  352.86   15.60
  13   1   1  329.37   17.00
  14  -1   1    1.30    3.60
  14  -1   1   -0.30    3.00
  14   1   1   -6.00    3.20
  15  -1   1  119.99    9.20
  15  -1   1  109.99   11.30
  15   1   1  106.59    9.60
  16  -1   1    1.90    4.40
  16  -1   1   -6.40    4.00
  16   1   1  -11.10    3.50
  16  -2  -1   19.40    5.20
  16  -2  -1    6.60    4.90
  16   2  -1    8.10    5.20
  15  -2  -1  201.38   13.90
  15  -2  -1  213.38   13.70
  15   2  -1  183.48   13.50
  14  -2  -1    9.90    4.50
  14  -2  -1    5.90    3.50
  14   2  -1    7.90    4.60
  13  -2  -1  249.18   11.60
  13  -2  -1  252.27   15.00
  13   2  -1  250.27   14.10
  12  -2  -1   -1.10    2.40
  12  -2  -1   -2.30    3.20
  11  -2  -1 1614.14   38.10
  11  -2  -1 1530.45   44.20
  11   2  -1 1582.14   41.90
 -10  -2   1   90.09    7.10
  10  -2  -1  100.79    5.80
  10  -2  -1   96.99    8.50
  10   2  -1   97.29    7.40
   9  -2  -1  263.07    9.20
   9  -2  -1  275.07   13.60
  -9  -2   1  249.78   11.10
   9   2  -1  258.57   11.70
   8  -2  -1  118.39    5.30
  -8  -2   1  119.49    4.10
  -8  -2   1  117.79    7.00
   8  -2  -1  113.09   10.10
   8   2  -1  131.89    7.60
  -7  -2   1  308.67   11.20
  -7  -2   1  306.37    9.10
  -7  -2   1  298.77    8.90
   7  -2  -1  314.57    9.00
   7  -2  -1  291.67   13.10
   7   2  -1  314.07   11.70
  -6  -2   1  211.68    7.40
   6  -2  -1  208.08    6.40
  -6  -2   1  203.08    8.10
   6  -2  -1  195.48    9.90
  -6  -2   1  213.78    7.30
   6   2  -1  200.48    8.70
  -5  -2   1 1761.92   39.70
   5  -2  -1 1873.01   38.20
   5  -2  -1 1750.52   43.10
  -5  -2   1 1852.51   40.20
  -5  -2   1 1857.81   40.20
   5   2  -1 1789.42   41.40
   4  -2  -1 1080.89   22.90
  -4  -2   1 1088.49   25.10
  -4  -2   1 1067.59   24.80
  -4  -2   1 1060.69   24.20
   4   2  -1 1011.00   25.50
  -3  -2   1    4.10    1.70
  -3  -2   1    6.80    2.00
   3  -2  -1    9.30    1.30
   3   2  -1    5.90    1.90
  -2  -2   1  123.59    5.20
   2  -2  -1  130.39    4.30
  -2  -2   1  118.39    5.20
  -2   2   1  129.49    4.10
   2   2  -1  117.99    5.30
   1  -2  -1 3168.18   87.59
  -1  -2   1 3191.08   93.19
   1   2  -1 3355.66   94.49
   0  -2   1  192.28    6.10
   0  -2  -1  211.18    6.30
   0   2  -1  205.38    6.20
   0   2   1  207.78    6.30
  -1  -2  -1  193.48    6.10
  -1  -2  -1  186.08    6.30
   1   2   1  173.68    6.00
   1   2   1  180.18    6.30
  -2  -2  -1  821.42   18.80
  -2  -2  -1  782.52   19.00
   2  -2   1  785.02   20.70
   2   2   1  773.82   19.20
   2   2   1  793.62   18.90
  -3  -2  -1 2263.57   48.70
   3  -2   1 2246.88   50.89
  -3  -2  -1 2250.77   47.70
   3   2   1 2178.98   48.30
   4  -2   1  321.67   12.50
  -4  -2  -1  337.47    9.50
  -4  -2  -1  347.07    9.50
   4   2   1  337.17   10.60
   4   2   1  336.67   10.40
  -5  -2  -1  346.77    9.40
  -5  -2  -1  330.37   11.80
   5  -2   1  349.17   13.70
  -5  -2  -1  325.77    9.20
   5   2   1  335.87   11.00
   5   2   1  338.77   10.80
  -6  -2  -1   47.00    4.80
   6  -2   1   31.80    5.10
  -6  -2  -1   37.90    2.30
  -6  -2  -1   32.10    2.20
   6   2   1   37.50    3.80
   6   2   1   36.30    3.90
   6   2   1   41.50    4.90
   7  -2   1  654.23   13.60
  -7  -2  -1  615.44   19.90
   7  -2   1  625.54   22.00
   7   2   1  624.84   18.40
   7   2   1  635.74   18.30
   7   2   1  633.84   19.80
  -8  -2  -1  192.88   10.40
   8  -2   1  211.58   12.10
   8  -2   1  215.68    6.10
   8   2   1  201.38   10.40
   8   2   1  207.78    9.50
   8   2   1  192.98    9.20
   9  -2   1   93.19    4.40
   9  -2   1   76.39    8.10
  -9  -2  -1  105.09    8.10
   9   2   1   96.69    7.60
   9   2   1   94.59    6.90
 -10  -2  -1   27.30    5.20
  10  -2   1   29.70    6.10
  10  -2   1   30.20    3.30
  10   2   1   39.10    5.60
  11  -2   1  382.66   22.70
 -11  -2  -1  351.46   25.60
  11  -2   1  402.46   12.60
  11   2   1  366.66   15.50
  12  -2   1    6.10    4.80
  12  -2   1    5.20    2.90
 -12  -2  -1    5.80    4.20
  12   2   1    8.20    3.90
  13  -2   1   24.30    4.30
  13  -2   1   31.70    7.20
  13   2   1   21.00    5.30
  14  -2   1   12.30    3.90
  14  -2   1    9.90    5.40
  14   2   1   12.70    5.00
  15  -2   1   92.59    8.00
  15  -2   1  104.09   12.60
  15   2   1   78.29    9.70
  16  -2   1   17.10    6.30
  16  -2   1   25.30    5.10
  16   2   1   20.00    6.60
  16  -3  -1   22.20    6.40
  16  -3  -1   20.40    5.20
  16   3  -1    9.80    5.90
  15  -3  -1   71.49   10.60
  15  -3  -1   65.99    7.00
  15   3  -1   57.99    9.00
  14  -3  -1   10.90    3.80
  14  -3  -1    3.60    4.50
  14   3  -1   10.30    5.10
  13  -3  -1  137.89    8.10
  13  -3  -1  105.99   10.90
  13   3  -1  149.39   11.40
  12  -3  -1   48.00    5.10
  12  -3  -1   41.80    7.60
  12   3  -1   34.50    6.40
  11  -3  -1  600.84   17.10
  11  -3  -1  541.75   23.10
 -11  -3   1  568.74   19.70
  11   3  -1  572.24   30.70
  10  -3  -1    1.10    3.20
  10  -3  -1    1.10    1.70
 -10  -3   1   -1.30    2.00
  10   3  -1    2.70    3.10
   9  -3  -1  741.53   25.80
  -9  -3   1  750.32   22.00
   9  -3  -1  770.32   19.00
  -9  -3   1  744.33   17.90
  -9  -3   1  740.03   17.90
   9   3  -1  735.63   23.60
  -8  -3   1   83.99    5.80
   8  -3  -1   86.79    4.30
   8  -3  -1   82.09    7.60
  -8  -3   1   83.09    4.60
  -8  -3   1   86.09    4.80
   8   3  -1   72.69    6.40
   7  -3  -1  192.18    6.40
  -7  -3   1  178.08    7.40
  -7  -3   1  189.68    7.70
  -7  -3   1  194.38    8.40
   7  -3  -1  198.78   13.10
   7   3  -1  202.28    9.80
   6  -3  -1  556.84   13.50
  -6  -3   1  530.05   15.50
   6  -3  -1  561.14   19.20
  -6  -3   1  550.74   15.50
  -6  -3   1  555.14   15.80
   6   3  -1  536.35   17.20
   5  -3  -1  210.98    6.40
  -5  -3   1  204.48    7.60
  -5  -3   1  219.38    8.60
  -5  -3   1  217.48    8.40
   5   3  -1  218.98    9.40
   4  -3  -1  172.38    5.50
  -4  -3   1  167.88    7.20
  -4  -3   1  161.68    7.00
   4   3  -1  163.88    7.60
   3  -3  -1  382.36   10.00
  -3  -3   1  366.76   11.70
  -3  -3   1  372.56   11.70
   3   3  -1  378.76   12.10
   2  -3  -1   38.90    2.70
  -2  -3   1   38.50    3.70
  -2  -3   1   46.80    3.90
   2   3  -1   39.50    3.80
  -2   3   1   42.50    2.80
  -1  -3   1   13.90    2.70
   1  -3  -1   17.60    2.30
   1   3  -1   13.50    2.20
  -1   3   1   16.60    2.30
   0  -3   1  363.86   10.60
   0  -3  -1  356.36   10.50
   0   3  -1  366.26   10.50
   0   3   1  365.86   10.60
  -1  -3  -1  140.69    6.30
  -1  -3  -1  145.89    6.10
   1   3   1  153.48    6.30
  -2  -3  -1  174.98    6.90
  -2  -3  -1  172.78    7.20
   2   3   1  187.08    7.60
   2   3   1  183.18    7.30
  -3  -3  -1 1600.44   36.10
   3  -3   1 1601.14   39.20
  -3  -3  -1 1609.34   36.50
   3   3   1 1584.04   36.60
   3   3   1 1588.54   37.00
   4  -3   1  167.98    9.00
  -4  -3  -1  157.48    7.20
  -4  -3  -1  169.38    6.80
  -4  -3  -1  173.48    7.10
   4   3   1  165.78    7.60
   4   3   1  179.28    7.50
  -5  -3  -1 2234.68   49.10
   5  -3   1 2252.77   54.49
  -5  -3  -1 2242.98   49.20
  -5  -3  -1 2247.18   50.99
   5   3   1 2208.68   51.09
   5   3   1 2306.87   50.89
  -6  -3  -1 1120.99   26.60
  -6  -3  -1 1118.29   29.50
  -6  -3  -1 1110.99   26.60
   6  -3   1 1098.19   32.50
   6   3   1 1191.38   29.80
   6   3   1 1184.98   29.40
   7  -3   1   98.19    8.20
  -7  -3  -1   99.89    4.70
  -7  -3  -1   94.49    4.50
  -7  -3  -1   97.29    6.90
   7   3   1  100.09    7.80
   7   3   1  101.69    6.70
   8  -3   1   24.70    5.50
   8  -3   1   24.40    1.60
  -8  -3  -1   22.70    1.90
  -8  -3  -1   22.30    4.20
   8   3   1   21.50    3.90
   8   3   1   26.60    4.40
  -9  -3  -1 1123.19   32.00
   9  -3   1 1116.19   35.40
   9  -3   1 1148.19   24.80
   9   3   1 1120.99   31.40
 -10  -3  -1   12.00    4.10
  10  -3   1   13.00    2.10
  10  -3   1    8.20    4.50
  10   3   1    4.70    3.40
 -11  -3  -1  162.18   11.30
  11  -3   1  180.38    7.10
  11  -3   1  154.18   12.40
  11   3   1  179.18   11.30
 -12  -3  -1  346.37   16.90
  12  -3   1  334.67   19.20
  12  -3   1  378.66   12.30
  12   3   1  375.56   17.00
  13  -3   1  119.69   11.60
 -13  -3  -1  117.49   10.10
  13  -3   1  107.59    6.70
  13   3   1  125.59   10.40
  14  -3   1    0.30    4.40
  14  -3   1    1.70    2.50
  14   3   1   -3.30    3.60
  15  -3   1   52.49    8.90
  15  -3   1   50.19    6.10
  15   3   1   38.80    7.90
  16  -3   1   27.30    7.70
  16  -3   1   35.80    6.00
  16   3   1   32.40    7.60
  16  -4  -1    0.60    4.90
  16  -4  -1    7.30    4.20
  16   4  -1    1.10    4.70
  15  -4  -1  113.19   12.20
  15  -4  -1   97.29    7.90
  15   4  -1   93.49   11.60
  14  -4  -1    7.90    3.50
  14  -4  -1    9.30    6.10
  14   4  -1    8.70    5.00
  13  -4  -1  166.88    8.80
  13  -4  -1  196.98   14.00
  13   4  -1  170.88   12.80
  12  -4  -1   51.29    5.00
 -12  -4   1   50.69    6.40
  12  -4  -1   45.80    8.40
  12   4  -1   64.29    9.10
  11  -4  -1  515.25   23.20
  11  -4  -1  546.15   15.90
 -11  -4   1  550.44   19.00
  11   4  -1  556.24   21.80
  10  -4  -1    0.70    1.60
  10  -4  -1   -4.00    2.60
 -10  -4   1   -1.30    1.40
 -10  -4   1   -1.50    2.00
 -10  -4   1    3.00    1.80
  10   4  -1   -0.70    2.60
  -9  -4   1  152.78    7.20
   9  -4  -1  160.88    6.50
  -9  -4   1  165.68    7.30
   9  -4  -1  150.58   11.20
  -9  -4   1  165.68    8.70
   9   4  -1  157.98   10.20
  -8  -4   1  134.99    7.40
  -8  -4   1  142.29    7.20
   8  -4  -1  138.99   10.20
   8  -4  -1  139.99    5.70
  -8  -4   1  135.39    6.90
   8   4  -1  139.59    9.00
  -7  -4   1 1006.50   26.20
  -7  -4   1 1000.60   26.00
   7  -4  -1 1021.90   23.40
   7  -4  -1  963.20   30.60
  -7  -4   1 1026.70   26.10
   7   4  -1 1022.30   28.90
  -6  -4   1   39.40    4.20
  -6  -4   1   40.10    4.30
   6  -4  -1   41.90    5.90
   6  -4  -1   41.40    3.00
  -6  -4   1   40.20    3.80
   6   4  -1   45.90    5.60
   5  -4  -1 1175.98   26.50
  -5  -4   1 1172.18   29.60
  -5  -4   1 1183.88   29.50
   5   4  -1 1149.08   30.80
  -4  -4   1  238.88    9.50
  -4  -4   1  233.88    9.40
   4  -4  -1  220.88    7.40
   4   4  -1  227.58    9.90
   3  -4  -1   41.30    3.10
  -3  -4   1   30.40    3.80
  -3  -4   1   38.60    3.80
   3   4  -1   37.30    4.00
  -2  -4   1  788.42   20.70
   2  -4  -1  766.52   18.90
  -2  -4   1  751.72   20.50
  -2   4   1  751.22   18.70
   2   4  -1  737.23   20.60
   1  -4  -1 5938.11  165.38
  -1  -4   1 6063.49  172.28
   1   4  -1 6171.18  173.38
   0  -4  -1 1833.72   41.70
   0  -4   1 1841.82   41.90
   0   4   1 1928.61   42.10
   1  -4   1 9505.05  238.38
  -1  -4  -1 9908.31  251.97
   1   4   1 9999.00  252.37
  -2  -4  -1  206.08    8.60
  -2  -4  -1  214.08    8.40
   2   4   1  210.28    8.60
   2   4   1  208.58    8.90
  -3  -4  -1  308.57   10.80
  -3  -4  -1  320.97   11.20
   3   4   1  307.37   11.50
   3   4   1  307.07   11.20
   4  -4   1   27.60    4.70
  -4  -4  -1   28.60    3.70
  -4  -4  -1   38.00    3.70
   4   4   1   33.80    4.30
   4   4   1   33.50    4.40
   5  -4   1   86.19    7.40
  -5  -4  -1   87.99    5.70
  -5  -4  -1   90.29    6.00
  -5  -4  -1  105.79    5.80
   5   4   1   90.39    6.40
  -6  -4  -1   88.49    5.50
  -6  -4  -1   89.29    6.30
   6  -4   1   82.19    7.60
  -6  -4  -1   95.59    5.70
   6   4   1   80.09    6.40
   6   4   1   91.39    6.90
   7  -4   1 1905.21   51.59
  -7  -4  -1 1989.20   44.30
   7  -4   1 1884.91   40.10
  -7  -4  -1 2017.50   47.50
  -7  -4  -1 1969.80   44.20
   7   4   1 1983.80   48.10
   7   4   1 1947.11   47.60
  -8  -4  -1   41.30    3.60
  -8  -4  -1   44.70    3.80
   8  -4   1   47.90    2.30
  -8  -4  -1   49.80    6.00
   8  -4   1   40.50    6.70
   8   4   1   45.10    6.00
   8   4   1   49.30    5.30
  -9  -4  -1  199.38    6.80
   9  -4   1  195.88    6.00
   9  -4   1  173.98   12.50
  -9  -4  -1  197.18    6.80
  -9  -4  -1  208.48   11.10
   9   4   1  191.98   11.10
 -10  -4  -1  105.69    8.70
  10  -4   1  111.59   10.50
  10  -4   1  105.19    4.60
  11  -4   1  479.55   22.60
  11  -4   1  460.55   12.70
 -11  -4  -1  438.46   18.60
  11   4   1  434.16   18.90
  12  -4   1   47.40    4.10
  12  -4   1   50.59    8.90
 -12  -4  -1   50.99    7.50
  12   4   1   37.90    7.10
 -13  -4  -1   16.10    5.00
  13  -4   1   17.90    3.20
  13  -4   1   11.20    5.60
  13   4   1   17.00    5.70
 -14  -4  -1   63.09    8.70
  14  -4   1   86.39   11.90
  14  -4   1   73.09    5.90
  14   4   1   73.69    9.80
  15  -4   1  110.19    7.50
  15  -4   1  119.79   14.20
  15   4   1  102.99   11.20
  16  -4   1  -12.00    6.00
  16  -4   1   -0.80    3.00
  16   4   1   -6.00    4.10
  16  -5  -1    3.20    5.10
  16  -5  -1    0.40    2.90
  16   5  -1   -9.40    5.00
  15  -5  -1   21.60    7.20
  15  -5  -1   21.00    4.70
  15   5  -1   34.90    8.10
  14  -5  -1   17.30    3.90
  14  -5  -1   17.50    6.20
  14   5  -1   13.40    6.00
  13  -5  -1   12.80    5.90
 -13  -5   1   11.60    4.30
  13  -5  -1    9.50    3.20
  13   5  -1   16.70    5.90
  12  -5  -1   53.89    9.40
  12  -5  -1   55.59    5.00
 -12  -5   1   53.39    6.60
  12   5  -1   47.00    8.00
 -11  -5   1  263.57    9.30
  11  -5  -1  272.97   16.90
 -11  -5   1  264.87    9.20
 -11  -5   1  267.07   12.60
  11  -5  -1  272.27    9.90
  11   5  -1  245.08   14.80
 -10  -5   1  211.88    9.00
 -10  -5   1  216.28   10.70
  10  -5  -1  212.88   14.00
  10  -5  -1  220.68    8.40
 -10  -5   1  213.48    9.20
  10   5  -1  197.38   12.40
  -9  -5   1  740.63   22.20
  -9  -5   1  771.62   21.60
  -9  -5   1  712.63   23.40
   9  -5  -1  784.92   28.30
   9  -5  -1  749.23   19.20
   9   5  -1  736.93   25.40
   8  -5  -1  110.79    9.90
  -8  -5   1  123.39    7.20
   8  -5  -1  110.29    5.40
  -8  -5   1  118.29    7.20
  -8  -5   1  111.69    7.10
   8   5  -1  110.19    8.70
   7  -5  -1  117.19    5.40
  -7  -5   1  127.69    7.60
   7  -5  -1  128.99    9.90
  -7  -5   1  112.79    6.60
  -7  -5   1  110.79    7.00
   7   5  -1  131.99    9.10
  -6  -5   1  744.93   20.10
  -6  -5   1  753.32   21.80
   6  -5  -1  715.43   18.30
  -6  -5   1  696.33   21.20
   6   5  -1  723.73   23.20
  -5  -5   1  162.48   10.10
   5  -5  -1  165.18    6.60
  -5  -5   1  151.38    8.40
   5   5  -1  154.18    9.00
  -4  -5   1  258.87   10.90
  -4  -5   1  273.97   13.00
   4  -5  -1  270.97    9.10
   4   5  -1  269.07   11.70
   3  -5  -1  845.12   21.30
  -3  -5   1  849.61   23.60
   3   5  -1  826.12   23.90
  -2  -5   1 1415.06   35.10
   2  -5  -1 1479.45   33.70
  -2  -5   1 1421.56   35.30
  -2   5   1 1413.56   33.30
   2   5  -1 1436.56   35.60
  -1  -5   1  601.44   18.00
  -1  -5   1  600.14   17.90
   1  -5  -1  600.44   17.10
   1   5  -1  615.64   18.20
  -1   5   1  643.04   17.50
   0  -5   1  178.38    8.00
   0  -5   1  192.38    8.30
   0  -5  -1  191.68    8.20
   0   5   1  192.38    8.40
   1  -5   1  431.46   13.40
  -1  -5  -1  442.56   14.10
  -1  -5  -1  424.86   14.40
   1   5   1  442.66   14.40
  -2  -5  -1   74.99    5.50
  -2  -5  -1   67.49    5.10
   2   5   1   70.39    5.30
   2   5   1   65.99    5.00
  -3  -5  -1   77.89    5.80
  -3  -5  -1   89.19    5.80
   3   5   1   78.19    6.00
  -4  -5  -1    4.80    2.30
  -4  -5  -1    7.20    2.70
   4   5   1    3.90    2.70
   4   5   1    1.40    2.20
  -5  -5  -1   14.40    3.20
  -5  -5  -1   21.00    3.60
   5  -5   1   24.60    5.20
   5   5   1   25.30    4.60
   5   5   1   22.30    4.20
   6  -5   1   95.69    8.90
  -6  -5  -1   97.99    6.30
  -6  -5  -1   95.79    6.70
   6  -5   1   92.19    4.20
  -6  -5  -1  100.99    6.90
   6   5   1   92.79    7.10
   6   5   1   90.89    7.30
  -7  -5  -1   55.89    5.00
  -7  -5  -1   50.79    5.50
   7  -5   1   44.70    2.80
  -7  -5  -1   47.90    4.70
   7  -5   1   35.90    6.50
   7   5   1   43.70    6.10
   7   5   1   50.29    6.30
  -8  -5  -1  113.09    6.60
   8  -5   1  101.59    9.80
   8  -5   1  103.59    4.20
  -8  -5  -1  100.49    6.20
  -8  -5  -1   95.89    7.50
   8   5   1  111.59    8.20
   8   5   1  100.39    8.20
   9  -5   1  385.16   10.30
   9  -5   1  394.46   19.60
  -9  -5  -1  392.76   12.70
  -9  -5  -1  369.96   15.50
  -9  -5  -1  381.56   12.60
   9   5   1  404.96   17.40
  10  -5   1    8.30    4.60
 -10  -5  -1    6.60    3.50
  10  -5   1    6.00    1.60
 -10  -5  -1    7.70    2.20
 -10  -5  -1    4.80    2.00
  10   5   1    1.80    3.70
  11  -5   1  106.09   11.60
  11  -5   1   98.19    5.00
 -11  -5  -1   99.99   10.20
  11   5   1   91.59    9.50
 -12  -5  -1  131.89   10.50
  12  -5   1  141.99    6.40
  12  -5   1  169.78   14.10
  12   5   1  146.79   11.70
  13  -5   1   30.10    7.60
  13  -5   1   34.00    4.00
 -13  -5  -1   35.50    6.60
  13   5   1   51.49    8.40
  14  -5   1   -3.40    5.30
 -14  -5  -1    5.90    4.10
  14  -5   1    2.40    2.20
  14   5   1  -10.80    3.80
  15  -5   1  202.08    9.40
  15  -5   1  165.08   16.00
  15   5   1  174.68   14.80
  16  -5   1   20.80    4.00
  16  -5   1   10.60    6.30
  16   5   1    7.40    6.20
  16  -6  -1   38.80    5.90
  16  -6  -1   50.89   10.90
  16   6  -1   46.50   10.20
  15  -6  -1  146.79   14.90
  15  -6  -1  146.59    8.80
  15   6  -1  136.89   14.10
  14  -6  -1    0.40    2.50
 -14  -6   1    8.00    3.40
  14  -6  -1   15.50    6.80
  14   6  -1    3.90    4.50
  13  -6  -1  175.18    8.70
 -13  -6   1  185.78   10.70
  13  -6  -1  158.98   14.40
  13   6  -1  181.58   14.30
 -12  -6   1  324.07   10.70
 -12  -6   1  329.97   10.80
  12  -6  -1  338.57   12.00
  12  -6  -1  296.87   18.90
 -12  -6   1  332.47   14.60
  12   6  -1  311.47   18.20
 -11  -6   1  390.26   15.40
  11  -6  -1  366.06   20.20
  11  -6  -1  351.86   12.30
 -11  -6   1  363.66   13.30
  11   6  -1  385.96   18.90
 -10  -6   1   28.40    4.40
 -10  -6   1   24.30    4.40
  10  -6  -1   31.70    7.40
  10  -6  -1   32.50    3.90
 -10  -6   1   27.50    4.50
  10   6  -1   34.30    7.20
   9  -6  -1  906.21   22.50
  -9  -6   1  878.11   25.30
  -9  -6   1  864.11   25.30
  -9  -6   1  890.21   25.30
   9  -6  -1  841.72   31.20
   9   6  -1  860.01   29.30
  -8  -6   1  388.66   14.00
  -8  -6   1  376.26   14.50
   8  -6  -1  367.76   11.80
   8  -6  -1  392.46   18.90
  -8  -6   1  373.46   14.50
   8   6  -1  378.76   17.10
  -7  -6   1  307.17   13.20
  -7  -6   1  343.37   13.80
  -7  -6   1  333.87   12.40
   7  -6  -1  331.17   10.80
   7   6  -1  308.37   17.80
  -6  -6   1  146.89    8.70
   6  -6  -1  143.19    6.60
  -6  -6   1  133.89    8.50
   6   6  -1  131.79    9.30
   5  -6  -1 1432.46   34.40
  -5  -6   1 1529.95   38.30
  -5  -6   1 1453.75   37.80
   5   6  -1 1495.05   39.50
  -4  -6   1  161.18    8.90
  -4  -6   1  169.88    9.10
   4  -6  -1  172.78    7.60
   4   6  -1  160.98    9.60
  -3  -6   1   40.90    5.40
   3  -6  -1   37.50    3.70
  -3  -6   1   38.00    5.00
   3   6  -1   37.60    5.40
  -2  -6   1  717.53   21.40
   2  -6  -1  727.53   20.10
  -2  -6   1  698.33   21.50
   2   6  -1  730.73   22.00
  -1  -6   1 3371.96   81.99
   1  -6  -1 3509.85   77.19
  -1  -6   1 3628.94   78.39
  -1   6   1 3666.83   77.59
   1   6  -1 3578.64   78.59
   0  -6   1 1654.93   39.30
   0  -6  -1 1599.94   39.00
   0  -6   1 1612.14   39.40
   0   6   1 1616.44   39.40
   1  -6   1  953.50   24.60
  -1  -6  -1  873.81   24.50
   1  -6   1  872.81   23.90
   2  -6   1   11.50    2.50
  -2  -6  -1    9.90    3.00
  -2  -6  -1   15.30    3.30
   2   6   1   13.60    3.00
   3  -6   1  618.44   17.10
  -3  -6  -1  605.74   19.50
  -3  -6  -1  610.54   19.00
   3   6   1  593.14   19.40
   3   6   1  560.34   19.50
   4  -6   1  505.35   15.00
  -4  -6  -1  516.95   17.30
  -4  -6  -1  544.55   18.20
   4   6   1  539.55   18.40
   4   6   1  508.35   18.40
   5  -6   1  135.79    6.20
  -5  -6  -1  145.19    8.20
  -5  -6  -1  148.09    8.60
   5   6   1  140.89    8.90
   5   6   1  132.59    9.00
   6  -6   1  301.97   15.90
   6  -6   1  315.37    9.90
  -6  -6  -1  317.17   12.80
  -6  -6  -1  299.47   12.80
   6   6   1  287.37   13.80
   6   6   1  314.87   14.00
  -7  -6  -1  318.67   13.00
   7  -6   1  327.17   17.20
  -7  -6  -1  345.87   13.90
  -7  -6  -1  329.77   13.10
   7  -6   1  319.57   10.00
   7   6   1  333.87   14.90
   8  -6   1  143.29    6.00
   8  -6   1  153.38   12.40
  -8  -6  -1  148.49    8.50
  -8  -6  -1  148.29    9.30
  -8  -6  -1  158.48    8.60
   8   6   1  158.68   10.80
  -9  -6  -1  115.89    7.40
   9  -6   1   99.79   11.10
  -9  -6  -1  123.79    7.50
   9  -6   1  113.79    5.20
  -9  -6  -1  109.39    8.50
   9   6   1  121.39   10.00
 -10  -6  -1  198.18    8.90
 -10  -6  -1  189.18   11.40
  10  -6   1  194.88    7.20
 -10  -6  -1  199.58    9.00
  10  -6   1  198.98   15.00
  10   6   1  183.28   12.90
  11  -6   1  142.19   13.40
 -11  -6  -1  125.69    6.10
  11  -6   1  125.29    5.80
 -11  -6  -1  121.39    6.10
  11   6   1  132.69   11.10
  12  -6   1   14.10    2.70
 -12  -6  -1   11.00    4.50
  12  -6   1   13.20    6.80
  12   6   1   15.50    6.30
 -13  -6  -1   41.10    6.70
  13  -6   1   46.00    9.30
  13  -6   1   37.10    4.10
  13   6   1   35.90    7.80
 -14  -6  -1   31.30    6.20
  14  -6   1   33.20    4.30
  14  -6   1   36.10    8.80
  14   6   1   28.50    7.50
  15  -6   1   56.49   11.40
  15  -6   1   55.49    5.30
 -15  -6  -1   55.49    8.10
  15   6   1   51.09   10.00
  15  -7  -1   20.80   10.20
  15  -7  -1   39.20    5.50
  15   7  -1   34.20    8.80
 -14  -7   1   80.39    7.60
  14  -7  -1   76.29    6.30
  14  -7  -1   64.89   11.10
  14   7  -1   50.69    9.80
  13  -7  -1   11.90    6.30
 -13  -7   1   10.60    2.50
  13  -7  -1    9.80    3.20
 -13  -7   1    7.50    3.60
 -13  -7   1    7.30    2.20
  13   7  -1   11.70    5.50
 -12  -7   1   64.69    6.00
  12  -7  -1   54.79    9.90
 -12  -7   1   53.29    6.70
 -12  -7   1   54.89    8.70
  12  -7  -1   66.99    5.70
  12   7  -1   64.59    9.90
  11  -7  -1  102.59    6.40
 -11  -7   1   81.09    7.10
  11  -7  -1  123.59   12.30
 -11  -7   1   90.29    7.90
 -11  -7   1   99.99    7.80
  11   7  -1   85.29   11.20
 -10  -7   1  491.65   17.90
  10  -7  -1  499.15   23.80
 -10  -7   1  483.25   17.80
  10  -7  -1  507.85   15.50
  10   7  -1  513.65   22.30
  -9  -7   1   22.50    4.90
  -9  -7   1   25.20    4.50
   9  -7  -1   23.50    3.60
   9  -7  -1   25.80    6.90
  -9  -7   1   25.10    5.90
   9   7  -1   19.30    5.90
   8  -7  -1    3.00    2.30
   8  -7  -1    7.50    4.50
  -8  -7   1    5.80    3.30
  -8  -7   1    3.40    3.50
  -8  -7   1    4.20    2.50
   8   7  -1    0.30    3.10
   7  -7  -1  600.94   17.10
  -7  -7   1  554.34   19.90
   7   7  -1  571.94   22.10
  -6  -7   1  197.08   11.20
  -6  -7   1  199.78   10.80
   6  -7  -1  204.98    8.70
   6   7  -1  183.58   11.50
  -5  -7   1  698.63   22.70
  -5  -7   1  684.63   22.60
   5  -7  -1  706.93   19.80
   4  -7  -1   14.90    3.10
  -4  -7   1   19.20    4.30
  -4  -7   1   15.00    4.00
   4   7  -1   11.30    3.50
  -3  -7   1 1755.72   44.10
  -3  -7   1 1707.53   43.50
   3  -7  -1 1753.22   41.40
   3   7  -1 1702.33   44.40
  -2  -7   1  425.16   15.80
  -2  -7   1  472.55   16.80
   2  -7  -1  429.06   14.90
   2   7  -1  442.36   16.70
   1  -7  -1   26.90    4.40
  -1  -7   1   23.60    4.10
  -1  -7   1   22.00    4.10
  -1   7   1   21.50    4.60
   0  -7  -1   39.40    5.00
   0  -7  -1   34.60    5.00
   0  -7   1   26.40    4.50
   0  -7   1   34.90    4.70
   0   7   1   36.00    5.00
  -1  -7  -1  168.58    9.40
  -1  -7  -1  146.39    8.60
   1  -7   1  153.08    8.30
   1  -7   1  158.08    8.70
   1   7   1  143.49    8.40
   2  -7   1  204.78    9.50
  -2  -7  -1  229.38   10.60
  -2  -7  -1  183.28   10.20
   2   7   1  199.78   10.50
   3  -7   1   13.00    3.10
  -3  -7  -1   17.20    4.20
  -3  -7  -1   12.30    3.40
   3   7   1   12.00    3.90
   3   7   1   19.60    4.40
  -4  -7  -1   63.09    6.10
   4  -7   1   47.40    4.50
  -4  -7  -1   55.09    5.80
   4   7   1   49.50    6.50
   4   7   1   55.79    6.90
  -5  -7  -1  109.69    7.80
  -5  -7  -1  101.89    7.90
   5  -7   1  111.79    6.20
   5   7   1   87.09    7.70
  -6  -7  -1  341.57   14.00
   6  -7   1  306.87   17.50
   6  -7   1  329.07   11.20
  -6  -7  -1  307.17   13.90
   6   7   1  330.57   15.60
  -7  -7  -1   57.39    6.20
   7  -7   1   57.79    8.90
  -7  -7  -1   57.49    6.70
  -7  -7  -1   52.99    6.40
   7  -7   1   53.89    4.30
   7   7   1   48.80    7.50
   7   7   1   67.09    7.30
  -8  -7  -1  361.26   14.60
   8  -7   1  373.76   11.70
   8  -7   1  341.47   19.10
  -8  -7  -1  342.67   14.40
  -8  -7  -1  369.86   15.40
   8   7   1  352.66   17.20
   9  -7   1   49.90    8.90
  -9  -7  -1   47.40    6.00
  -9  -7  -1   52.69    6.70
  -9  -7  -1   51.69    6.10
   9  -7   1   46.10    4.00
   9   7   1   41.20    7.30
 -10  -7  -1  158.08    8.90
  10  -7   1  162.58    7.00
 -10  -7  -1  167.88    9.30
  10  -7   1  162.68   14.40
  10   7   1  163.78   12.50
 -11  -7  -1   39.70    6.60
  11  -7   1   28.30    3.50
  11  -7   1   35.70    8.20
 -11  -7  -1   34.00    4.50
  11   7   1   46.00    8.00
  12  -7   1  113.89   12.80
 -12  -7  -1  131.09    6.20
 -12  -7  -1  131.99   10.50
  12  -7   1  128.59    6.50
 -12  -7  -1  130.49    6.20
  12   7   1  110.79   11.80
  13  -7   1   47.10    9.90
  13  -7   1   60.59    4.70
 -13  -7  -1   50.69    7.70
  13   7   1   46.70    8.80
  14  -7   1   30.50    4.10
  14  -7   1   18.40    8.50
 -14  -7  -1   24.00    5.90
  14   7   1   45.50    9.50
 -15  -7  -1   50.59    7.70
  15  -7   1   45.40   10.60
  15  -7   1   56.69    5.30
  15   7   1   56.29   11.40
  15  -8  -1   74.99    7.00
  15  -8  -1   73.89   13.20
 -15  -8   1   73.19    7.20
  14  -8  -1    0.10    2.70
  14  -8  -1   -2.50    7.40
 -14  -8   1   -1.30    3.00
 -14  -8   1    0.20    1.50
  14   8  -1    2.80    4.80
 -13  -8   1   86.29    6.50
 -13  -8   1   77.89    7.70
  13  -8  -1   87.29    6.70
  13  -8  -1   83.29   12.80
  13   8  -1   83.59   11.80
  12  -8  -1  218.78   10.10
  12  -8  -1  206.58   17.30
 -12  -8   1  218.28   12.00
 -12  -8   1  210.48   10.90
  12   8  -1  241.68   17.10
 -11  -8   1  197.78   11.00
  11  -8  -1  161.48   15.20
 -11  -8   1  168.68   10.50
 -11  -8   1  195.28   11.00
  11  -8  -1  171.78    8.80
  11   8  -1  197.88   14.50
 -10  -8   1    2.90    4.10
 -10  -8   1    7.60    4.00
  10  -8  -1   -0.20    2.50
  10  -8  -1   -4.10    4.00
 -10  -8   1    1.90    2.90
  10   8  -1    0.20    4.10
  -9  -8   1  108.69    9.00
   9  -8  -1  110.19    6.90
   9  -8  -1  110.19   11.90
  -9  -8   1  115.99    8.20
   9   8  -1  101.09   10.40
  -8  -8   1  967.90   27.40
  -8  -8   1  925.31   28.90
   8  -8  -1  921.71   25.10
   8   8  -1  918.51   31.90
  -7  -8   1   11.10    4.00
   7  -8  -1   13.40    3.20
   7   8  -1    4.70    4.10
  -6  -8   1    8.50    3.80
   6  -8  -1    9.90    3.00
  -6  -8   1    9.90    4.00
   6   8  -1   16.40    4.90
   5  -8  -1  701.63   21.20
  -5  -8   1  735.33   24.50
  -5  -8   1  706.83   23.90
   5   8  -1  769.82   25.90
   4  -8  -1 1446.36   35.60
  -4  -8   1 1355.96   38.50
  -4  -8   1 1377.86   38.30
   4   8  -1 1386.56   39.20
   3  -8  -1  379.66   14.00
  -3  -8   1  389.26   15.80
  -3  -8   1  361.16   15.80
   3   8  -1  337.57   18.30
  -2  -8   1  498.85   18.60
   2  -8  -1  510.65   17.30
  -2  -8   1  498.55   18.30
   2   8  -1  494.05   18.70
   1  -8  -1  502.55   17.60
  -1  -8   1  516.35   18.60
  -1  -8   1  517.75   18.30
   0  -8  -1 3687.73   84.49
   0  -8  -1 3947.10   86.29
   0  -8   1 3850.41   85.59
   0  -8   1 3697.83   84.59
   0   8   1 3773.22   85.29
   1  -8   1  924.51   26.60
  -1  -8  -1  910.51   27.90
  -1  -8  -1  902.11   27.00
   1  -8   1  960.50   27.40
   1   8   1  938.01   27.90
  -2  -8  -1  491.45   18.00
   2  -8   1  495.65   17.00
  -2  -8  -1  488.85   18.60
   2   8   1  528.05   19.20
  -3  -8  -1 1218.48   33.90
   3  -8   1 1145.59   30.80
  -3  -8  -1 1115.49   35.80
   3   8   1 1182.28   33.90
  -4  -8  -1  109.99    8.60
  -4  -8  -1  123.89    9.00
   4  -8   1  112.19    7.10
   4   8   1  121.99    9.10
   4   8   1  113.19    9.20
  -5  -8  -1   11.30    4.10
  -5  -8  -1    9.60    3.90
   5  -8   1   14.80    3.10
   5   8   1   14.90    4.70
   5   8   1   13.30    4.30
  -6  -8  -1  364.86   16.10
   6  -8   1  363.46   12.90
  -6  -8  -1  357.26   15.40
   6   8   1  354.96   16.80
   6   8   1  383.36   17.60
   7  -8   1  214.28    9.20
   7  -8   1  228.68   15.30
  -7  -8  -1  202.48   11.50
  -7  -8  -1  193.78   11.40
   7   8   1  224.78   13.60
  -8  -8  -1  182.48   10.70
   8  -8   1  188.98    8.50
  -8  -8  -1  189.78   11.20
   8  -8   1  186.58   14.60
  -8  -8  -1  183.38   11.10
   8   8   1  169.88   12.60
   9  -8   1   25.40    7.00
   9  -8   1   21.80    3.50
  -9  -8  -1   24.60    5.10
  -9  -8  -1   13.30    4.30
   9   8   1   31.40    6.80
 -10  -8  -1  106.79    9.20
 -10  -8  -1  118.09    8.50
  10  -8   1  106.99   13.50
  10  -8   1  110.69    6.30
 -10  -8  -1  111.29    8.50
  10   8   1  100.79   10.60
  11  -8   1   62.39   10.60
 -11  -8  -1   62.69    6.50
  11  -8   1   66.49    5.20
 -11  -8  -1   69.19    8.40
  11   8   1   71.19   10.40
 -12  -8  -1    9.70    3.10
  12  -8   1    3.90    2.30
 -12  -8  -1    5.10    3.80
  12  -8   1   -2.20    5.20
  12   8   1   -1.50    4.50
  13  -8   1   46.70    4.80
 -13  -8  -1   61.59    8.30
 -13  -8  -1   48.90    3.70
 -13  -8  -1   54.59    3.70
  13   8   1   41.30    8.70
 -14  -8  -1  181.38   12.70
  14  -8   1  192.38    8.90
  14  -8   1  197.58   18.10
  14   8   1  190.88   15.90
  15  -8   1  153.98    8.30
 -15  -8  -1  159.58   12.20
  15  -9  -1   38.20   15.60
 -15  -9   1   35.60    5.70
  15   9  -1   52.09   11.20
 -14  -9   1  192.38    9.00
  14  -9  -1  217.58   10.60
  14  -9  -1  183.08   18.00
 -14  -9   1  173.58   14.50
  13  -9  -1   25.80    4.60
 -13  -9   1   21.10    4.50
  13  -9  -1   37.20   15.00
 -13  -9   1   15.40    4.20
 -13  -9   1   26.80    8.00
  13   9  -1   25.90    8.00
  12  -9  -1   -8.20    5.20
 -12  -9   1    1.30    3.70
  12  -9  -1   -2.00    2.40
 -12  -9   1   -3.20    2.60
  12   9  -1    3.10    5.70
 -11  -9   1  140.29   10.60
  11  -9  -1  147.09   14.50
 -11  -9   1  154.88   10.60
 -11  -9   1  147.19   10.10
  11  -9  -1  126.79    8.30
  11   9  -1  166.38   14.10
 -10  -9   1  497.35   18.70
 -10  -9   1  480.55   19.50
  10  -9  -1  492.85   16.70
  10  -9  -1  484.75   25.30
  10   9  -1  464.65   23.10
  -9  -9   1    7.70    4.10
  -9  -9   1    6.00    3.20
  -9  -9   1    2.50    3.90
   9  -9  -1    6.50    3.00
   9  -9  -1    3.10    5.10
   9   9  -1    4.70    4.40
  -8  -9   1   13.80    4.80
   8  -9  -1   18.30    3.80
  -8  -9   1   20.10    5.40
   8   9  -1   24.60    6.70
  -7  -9   1  200.28   12.10
  -7  -9   1  209.28   12.50
   7  -9  -1  211.58   10.20
   7   9  -1  214.48   14.10
  -6  -9   1  715.23   25.10
   6  -9  -1  746.03   22.00
  -6  -9   1  663.83   24.10
   6   9  -1  692.13   26.40
  -5  -9   1  204.58   12.10
  -5  -9   1  188.48   11.90
   5  -9  -1  212.18   10.30
   5   9  -1  203.28   13.00
  -4  -9   1    3.30    3.10
  -4  -9   1    3.70    2.60
   4  -9  -1    3.40    2.60
   4   9  -1    2.30    3.50
   3  -9  -1  381.96   15.00
  -3  -9   1  363.56   15.80
   3   9  -1  355.86   16.70
  -2  -9   1  167.78   10.50
  -2  -9   1  174.18   10.90
   2  -9  -1  172.28    9.80
   1  -9  -1  199.48   11.20
   1  -9  -1  178.18   10.30
  -1  -9   1  170.38   10.80
   0  -9   1  215.48   11.90
   0  -9  -1  230.28   12.40
   0  -9   1  231.48   11.90
   0  -9  -1  194.78   12.80
   1  -9   1  383.76   16.10
   1  -9   1  391.66   15.80
  -1  -9  -1  436.46   17.60
  -1  -9  -1  382.26   16.20
   2  -9   1   16.10    4.30
  -2  -9  -1   28.60    5.40
   2  -9   1   20.40    4.30
  -2  -9  -1   22.70    5.20
   2   9   1   27.00    5.40
   3  -9   1    0.00    2.30
  -3  -9  -1    1.80    3.10
   3   9   1   -3.00    2.60
   4  -9   1  459.55   16.30
  -4  -9  -1  428.56   18.50
  -4  -9  -1  440.36   18.00
   4   9   1  472.35   19.50
  -5  -9  -1  374.26   16.30
  -5  -9  -1  350.36   16.40
   5  -9   1  356.96   13.80
   5   9   1  349.67   17.30
  -6  -9  -1  397.06   17.70
  -6  -9  -1  394.96   17.10
   6  -9   1  431.16   15.00
   6   9   1  391.96   19.00
  -7  -9  -1   89.49    8.80
   7  -9   1   78.89    6.30
   7  -9   1  103.09   11.30
  -7  -9  -1   91.89    8.40
   7   9   1   90.49    9.70
  -8  -9  -1   33.50    6.00
   8  -9   1   27.20    7.90
  -8  -9  -1   36.60    6.60
   8  -9   1   20.40    4.00
   8   9   1   32.80    7.30
   9  -9   1   73.79   11.40
  -9  -9  -1   70.59    8.20
   9  -9   1   69.99    5.80
  -9  -9  -1   70.39    7.90
  -9  -9  -1   70.39    8.50
   9   9   1   57.79    9.10
 -10  -9  -1    4.40    3.70
 -10  -9  -1   10.60    4.00
 -10  -9  -1    3.90    3.60
  10  -9   1    3.30    2.60
  10  -9   1    7.70    5.70
  10   9   1   15.70    5.90
  11  -9   1  134.99    7.70
  11  -9   1  143.69   14.90
 -11  -9  -1  130.79   10.60
 -11  -9  -1  127.79    9.50
  11   9   1  124.79   12.60
 -12  -9  -1  158.28   11.60
 -12  -9  -1  163.68    9.70
 -12  -9  -1  175.78   10.20
  12  -9   1  168.88    8.50
  12   9   1  151.68   14.10
  13  -9   1   49.90    5.30
  13  -9   1   34.80    9.40
 -13  -9  -1   40.00    4.90
 -13  -9  -1   54.69    8.30
  13   9   1   42.30    9.50
  14  -9   1   13.70    3.70
  14  -9   1   11.60    8.40
 -14  -9  -1   16.90    5.40
  14 -10  -1   14.60    4.30
 -14 -10   1   19.40    4.40
 -14 -10   1   16.00    4.50
  14 -10  -1   14.20    9.40
  14  10  -1   14.00    7.70
 -13 -10   1   33.00    6.00
 -13 -10   1   20.30    5.20
  13 -10  -1   22.30    5.60
 -13 -10   1   19.30    5.00
  13 -10  -1   21.10    8.90
 -12 -10   1  398.06   17.80
  12 -10  -1  397.86   21.50
 -12 -10   1  417.76   17.90
  12 -10  -1  358.46   24.80
  12  10  -1  367.86   22.50
 -11 -10   1  170.98   11.90
 -11 -10   1  199.18   12.30
  11 -10  -1  177.88   16.80
  11 -10  -1  182.78   10.20
  11  10  -1  177.38   15.60
  10 -10  -1    8.00    3.60
 -10 -10   1    2.90    3.50
  10 -10  -1    0.40    4.80
 -10 -10   1   11.10    5.20
 -10 -10   1    2.40    4.00
  10  10  -1   -3.70    4.40
   9 -10  -1   52.59    6.30
  -9 -10   1   48.90    7.50
  -9 -10   1   53.09    8.10
   9 -10  -1   56.69   10.50
  -9 -10   1   46.60    9.00
   9  10  -1   40.10    8.40
  -8 -10   1  250.77   14.10
   8 -10  -1  218.38   11.20
  -8 -10   1  216.88   13.80
   8  10  -1  221.58   15.50
   7 -10  -1  347.77   14.20
  -7 -10   1  323.87   16.30
  -7 -10   1  323.27   16.80
   7  10  -1  339.57   18.00
  -6 -10   1   24.50    5.90
   6 -10  -1   20.40    4.40
  -6 -10   1   35.10    6.70
   6  10  -1   15.30    5.80
   5 -10  -1  281.57   13.00
  -5 -10   1  256.57   14.30
  -5 -10   1  257.47   14.70
   5  10  -1  273.87   15.80
   4 -10  -1  980.80   33.70
  -4 -10   1 1092.89   33.90
  -4 -10   1 1097.39   33.40
   4  10  -1 1114.39   35.00
  -3 -10   1  111.59    9.40
  -3 -10   1  134.09    9.80
   2 -10  -1  338.17   14.90
  -2 -10   1  354.06   16.10
  -2 -10   1  324.17   16.00
  -1 -10   1  927.01   29.00
  -1 -10   1  903.91   29.40
   1 -10  -1  898.51   27.90
   0 -10  -1  391.56   17.30
   0 -10  -1  375.66   16.30
   0 -10   1  370.26   16.30
  -1 -10  -1  273.37   13.60
  -1 -10  -1  275.17   14.30
   1 -10   1  290.27   13.90
   1 -10   1  289.57   14.40
   2 -10   1 1327.47   37.80
  -2 -10  -1 1370.56   39.50
  -2 -10  -1 1325.07   38.00
   3 -10   1   68.09    7.10
   3 -10   1   64.79    6.60
  -3 -10  -1   69.79    8.50
  -3 -10  -1   59.19    8.40
  -4 -10  -1  222.78   12.80
   4 -10   1  241.48   12.00
  -4 -10  -1  269.37   14.60
  -5 -10  -1   31.70    5.80
  -5 -10  -1   37.90    6.80
   5 -10   1   28.60    4.90
  -6 -10  -1  798.02   27.90
  -6 -10  -1  758.32   26.70
   6 -10   1  785.12   24.00
   6  10   1  777.52   29.30
  -7 -10  -1    9.90    4.80
   7 -10   1    6.20    3.20
  -7 -10  -1   -4.00    3.00
   7  10   1    6.40    5.00
  -8 -10  -1   54.99    8.00
  -8 -10  -1   54.29    8.30
   8 -10   1   52.59    6.10
   8 -10   1   62.69   10.90
   8  10   1   46.70    8.80
   9 -10   1   54.19   10.60
  -9 -10  -1   41.80    7.20
  -9 -10  -1   54.39    7.60
   9 -10   1   58.69    5.90
  -9 -10  -1   53.39    7.60
   9  10   1   56.99   10.10
 -10 -10  -1  133.89   10.40
 -10 -10  -1  132.79   10.40
  10 -10   1  130.59    8.10
 -10 -10  -1  150.08   11.20
  10 -10   1  129.59   15.90
  10  10   1  143.09   13.80
 -11 -10  -1   66.79    8.20
 -11 -10  -1   79.19    8.70
  11 -10   1   66.39    6.40
 -11 -10  -1   69.19    8.60
  11 -10   1   80.69   21.70
  11  10   1   84.89   12.20
 -12 -10  -1   12.20    4.50
 -12 -10  -1    8.60    4.80
  12 -10   1   19.50    4.10
 -12 -10  -1    5.30    4.10
  12 -10   1   20.20    8.70
  12  10   1   14.60    7.50
 -13 -10  -1    7.20    3.70
  13 -10   1   15.20    7.50
  13 -10   1    2.20    3.20
 -13 -10  -1    3.60    4.00
 -13 -10  -1    2.10    3.70
  14 -10   1   83.89    6.80
 -14 -10  -1   79.89    5.90
 -14 -10  -1   75.59    9.50
  14  10   1   76.79   13.20
  14 -11  -1  143.79    9.90
 -14 -11   1  167.08   11.30
  14  11  -1  146.59   15.90
 -13 -11   1    8.10    4.80
  13 -11  -1   18.40   12.60
  13 -11  -1   12.80    3.90
 -13 -11   1    6.50    4.40
 -13 -11   1    9.60    4.50
  13  11  -1   -3.80    5.60
 -12 -11   1    2.30    4.60
  12 -11  -1    6.30    3.80
  12 -11  -1   16.20    7.70
 -12 -11   1    6.40    4.70
 -12 -11   1    3.30    4.10
 -11 -11   1  110.29    9.70
 -11 -11   1   95.99   10.40
 -11 -11   1  102.19   10.50
  11 -11  -1   83.49    7.80
  11 -11  -1  116.89   15.60
  11  11  -1   93.99   13.20
  10 -11  -1  415.56   24.30
  10 -11  -1  391.86   16.00
 -10 -11   1  363.96   18.50
 -10 -11   1  407.36   17.80
 -10 -11   1  382.76   18.90
  10  11  -1  416.46   23.20
  -9 -11   1    5.70    4.50
  -9 -11   1    2.00    4.30
   9 -11  -1    1.60    3.10
   9  11  -1    4.30    4.00
  -8 -11   1   32.90    7.20
   8 -11  -1   38.10    5.80
  -8 -11   1   40.50    7.70
   8  11  -1   47.30    9.10
  -7 -11   1   64.79    9.00
   7 -11  -1   47.50    6.60
  -7 -11   1   64.89    9.30
   7  11  -1   51.89    8.70
  -6 -11   1  685.53   25.90
   6 -11  -1  690.73   23.20
  -6 -11   1  664.43   26.10
   6  11  -1  673.53   27.80
  -5 -11   1    1.60    4.00
   5 -11  -1    3.30    3.30
  -5 -11   1    1.80    3.90
   5  11  -1    2.20    4.20
  -4 -11   1   51.79    8.30
   4 -11  -1   52.99    7.10
  -4 -11   1   55.59    7.90
  -3 -11   1  467.45   20.70
  -3 -11   1  478.05   20.30
   3 -11  -1  491.15   19.00
  -2 -11   1  156.58   11.10
   2 -11  -1  155.18   10.90
  -2 -11   1  147.89   11.30
   2 -11  -1  164.58   10.60
  -1 -11   1   59.99    8.00
   1 -11  -1   59.79    8.10
   1 -11  -1   42.80    6.40
  -1 -11   1   60.09    8.20
   0 -11  -1  166.68   11.60
   0 -11  -1  165.08   11.10
   0 -11   1  169.38   11.30
   0 -11   1  173.68   11.80
  -1 -11  -1  329.37   16.00
   1 -11   1  336.57   15.80
   1 -11   1  333.17   16.20
  -1 -11  -1  310.67   16.40
  -2 -11  -1   78.29    9.60
   2 -11   1   85.99    8.10
  -2 -11  -1  101.99    9.20
   2 -11   1   96.79    9.00
  -3 -11  -1    1.50    2.90
  -3 -11  -1   -7.20    2.50
   3 -11   1    5.30    3.90
   3 -11   1   -0.90    2.80
   4 -11   1  731.63   24.60
  -4 -11  -1  749.62   26.70
  -4 -11  -1  751.82   27.70
   5 -11   1  176.38   10.60
  -5 -11  -1  176.78   12.50
  -5 -11  -1  184.08   13.00
  -6 -11  -1  259.97   15.50
   6 -11   1  236.08   14.80
  -6 -11  -1  255.67   14.80
  -7 -11  -1   66.49    9.10
  -7 -11  -1   51.39    8.60
   7  11   1   65.89    9.70
   8 -11   1  441.06   25.20
  -8 -11  -1  460.35   20.80
  -8 -11  -1  486.35   20.60
   8 -11   1  397.86   18.90
   8  11   1  438.16   22.80
  -9 -11  -1  106.79   10.00
   9 -11   1   96.89    8.10
  -9 -11  -1   96.69   11.10
  -9 -11  -1  113.89   10.50
   9 -11   1  102.99   14.30
   9  11   1   97.09   12.90
  10 -11   1  156.28   21.80
 -10 -11  -1  173.18   12.00
  10 -11   1  165.78   10.10
 -10 -11  -1  178.88   12.70
 -10 -11  -1  169.18   12.20
  10  11   1  152.38   14.40
 -11 -11  -1    4.50    4.00
 -11 -11  -1    0.60    4.40
  11 -11   1    0.60    6.50
  11 -11   1    5.20    3.90
 -11 -11  -1    9.40    5.10
  11  11   1   -4.90    3.90
 -12 -11  -1  282.47   15.00
 -12 -11  -1  298.57   16.60
  12 -11   1  307.57   23.50
 -13 -11  -1   33.30    7.10
 -13 -11  -1   42.60    6.60
  13  11   1   42.20    9.80
 -14 -11  -1   37.50    5.50
  14  11   1   46.20   10.40
 -13 -12   1   48.90    8.40
 -13 -12   1   41.50    7.50
 -13 -12   1   41.00    6.80
  13 -12  -1   51.69    7.00
  13  12  -1   24.20    9.30
 -12 -12   1  447.36   21.20
 -12 -12   1  451.05   19.70
  12 -12  -1  455.15   18.30
  12  12  -1  428.46   25.90
  11 -12  -1   20.60    8.10
  11 -12  -1   24.20    5.50
 -11 -12   1   20.70    6.80
 -11 -12   1   20.70    5.60
 -11 -12   1   17.40    6.40
 -10 -12   1   -3.50    4.20
 -10 -12   1   -1.10    3.20
 -10 -12   1   -2.20    3.90
  10 -12  -1    4.30    5.20
  10 -12  -1    4.20    3.70
  10  12  -1    7.30    5.90
  -9 -12   1   41.10    8.10
   9 -12  -1   23.80    5.30
  -9 -12   1   28.50    7.20
   9  12  -1   33.90    8.80
   8 -12  -1  379.46   16.40
  -8 -12   1  365.96   19.50
  -8 -12   1  360.46   18.80
   8  12  -1  339.47   20.80
   7 -12  -1   59.59    7.60
  -7 -12   1   46.10    9.00
  -7 -12   1   61.39    9.10
   7  12  -1   59.69   10.00
   6 -12  -1    0.50    3.50
  -6 -12   1    8.30    5.30
  -6 -12   1   -0.70    4.40
   6  12  -1    2.80    5.60
   5 -12  -1   10.00    4.60
  -5 -12   1    7.00    5.00
  -5 -12   1   10.80    5.30
   4 -12  -1  506.35   20.30
  -4 -12   1  502.85   21.80
  -4 -12   1  466.85   21.50
  -3 -12   1    5.20    4.10
  -3 -12   1    7.10    4.00
   3 -12  -1    6.60    4.00
   2 -12  -1  234.08   14.30
   2 -12  -1  229.38   13.30
  -2 -12   1  217.48   13.80
  -2 -12   1  247.18   14.50
  -1 -12   1  229.08   13.50
   1 -12  -1  233.78   14.40
  -1 -12   1  233.48   14.60
   1 -12  -1  227.88   13.50
   0 -12   1  488.85   21.10
   0 -12   1  452.15   19.80
   0 -12  -1  466.15   21.00
   0 -12  -1  443.66   19.60
   1 -12   1  116.29    9.80
  -1 -12  -1  109.99   10.50
   1 -12   1  110.19    9.90
  -1 -12  -1  123.59   10.50
   2 -12   1  306.97   15.40
  -2 -12  -1  286.47   15.70
   2 -12   1  302.57   16.00
  -2 -12  -1  278.97   16.20
   3 -12   1   93.39    9.40
   3 -12   1   97.19    8.90
  -3 -12  -1   98.09   10.20
  -3 -12  -1   95.69    9.70
   4 -12   1  714.53   26.30
  -4 -12  -1  717.03   27.00
   4 -12   1  710.53   25.10
  -4 -12  -1  757.02   28.60
   5 -12   1    7.90    4.00
  -5 -12  -1    6.10    4.50
  -5 -12  -1    6.80    4.90
  -6 -12  -1  529.65   23.60
   6 -12   1  491.45   19.70
  -6 -12  -1  507.25   22.30
   7 -12   1   85.59    8.50
  -7 -12  -1  103.79   11.00
  -7 -12  -1   83.29   10.30
  -8 -12  -1  194.98   14.10
   8 -12   1  140.79   15.50
  -8 -12  -1  177.48   13.20
   8 -12   1  162.78   10.70
  -9 -12  -1   12.90    5.70
   9 -12   1    5.60    3.60
   9 -12   1    9.90    7.10
  -9 -12  -1    8.60    5.10
 -10 -12  -1  309.77   17.10
 -10 -12  -1  289.27   16.80
  10 -12   1  321.07   14.30
 -10 -12  -1  293.87   16.90
  10 -12   1  289.77   21.90
  10  12   1  302.77   20.60
  11 -12   1   74.49   13.60
 -11 -12  -1   99.39   10.70
 -11 -12  -1   76.09    9.80
 -11 -12  -1   93.79    9.90
  11 -12   1   78.49    7.80
 -12 -12  -1    6.60    5.30
  12 -12   1    6.00    3.70
 -12 -12  -1   -2.30    4.10
 -12 -12  -1   -8.30    3.50
  12  12   1    2.50    6.10
 -13 -12  -1    8.90    4.80
 -13 -12  -1    3.40    5.00
 -13 -12  -1   -0.70    4.30
  13 -12   1   -0.60    3.50
 -13 -13   1   43.60    7.20
 -13 -13   1   41.10    7.70
 -13 -13   1   37.50    8.40
  13 -13  -1   51.99    7.40
  13  13  -1   47.20   10.90
  12 -13  -1    2.70    3.60
 -12 -13   1    5.70    5.00
 -12 -13   1    7.00    5.20
 -12 -13   1   -2.50    3.70
  12  13  -1   -1.30    5.30
 -11 -13   1   22.60    7.00
 -11 -13   1    4.70    6.60
  11 -13  -1    9.30    4.70
 -11 -13   1   15.70    5.40
  11  13  -1    6.90    6.10
 -10 -13   1  397.66   20.20
  10 -13  -1  338.27   23.80
  10 -13  -1  351.36   16.50
 -10 -13   1  386.26   20.30
  10  13  -1  311.77   25.10
  -9 -13   1   -3.30    4.30
  -9 -13   1    2.40    4.40
   9 -13  -1    3.60    3.80
   9  13  -1   -5.90    4.50
  -8 -13   1    1.90    4.60
   8 -13  -1    2.50    3.70
  -8 -13   1    0.50    4.90
   8  13  -1    3.20    5.90
   7 -13  -1   31.00    6.50
  -7 -13   1   19.90    6.80
  -7 -13   1   22.70    7.40
  -6 -13   1  840.72   31.20
  -6 -13   1  836.92   32.10
   6 -13  -1  828.12   28.30
   5 -13  -1   39.60    7.00
  -5 -13   1   32.90    7.80
  -5 -13   1   38.30    8.10
  -4 -13   1  261.37   16.00
  -4 -13   1  250.07   15.80
   4 -13  -1  246.08   14.60
   3 -13  -1   15.80    5.00
  -3 -13   1    3.90    4.40
   3 -13  -1    4.40    5.00
  -3 -13   1    7.80    5.20
  -2 -13   1  401.66   19.60
   2 -13  -1  386.16   19.70
   2 -13  -1  425.76   19.30
  -2 -13   1  431.16   20.90
   1 -13  -1   -3.50    3.90
  -1 -13   1   -7.80    3.30
   1 -13  -1    6.90    4.30
  -1 -13   1    7.50    4.70
   0 -13   1  222.58   14.40
   0 -13   1  282.57   16.30
   0 -13  -1  257.67   15.60
   0 -13  -1  259.17   15.20
  -1 -13  -1   47.10    8.60
  -1 -13  -1   53.09    8.40
   1 -13   1   59.19    8.50
   1 -13   1   60.79    9.00
   2 -13   1  219.38   14.20
   2 -13   1  202.38   13.20
  -2 -13  -1  192.08   14.20
  -2 -13  -1  217.28   14.10
   3 -13   1   71.39    9.40
  -3 -13  -1   54.59    8.70
   3 -13   1   51.89    7.80
  -3 -13  -1   51.49    9.00
   4 -13   1  487.65   21.60
  -4 -13  -1  471.05   22.80
   4 -13   1  464.15   20.00
  -4 -13  -1  446.36   21.40
   5 -13   1   14.10    5.20
   5 -13   1    3.80    4.00
  -5 -13  -1    5.40    5.40
  -5 -13  -1    3.60    4.90
  -6 -13  -1  269.87   16.60
   6 -13   1  277.77   15.00
  -6 -13  -1  272.87   17.40
  -7 -13  -1   58.09    9.40
   7 -13   1   52.19    7.70
  -7 -13  -1   59.49    9.50
   8 -13   1  386.56   17.10
  -8 -13  -1  340.07   18.70
   8 -13   1  324.27   22.60
  -8 -13  -1  386.06   20.60
   9 -13   1   60.59    7.90
   9 -13   1   41.60   10.60
  -9 -13  -1   50.19    8.60
  -9 -13  -1   54.99    9.70
 -10 -13  -1   14.00    6.90
 -10 -13  -1    4.40    5.00
  10 -13   1   20.70    5.40
 -10 -13  -1   19.50    5.90
 -11 -13  -1   26.80    7.00
 -11 -13  -1    5.10    5.20
  11 -13   1    6.40    4.20
 -11 -13  -1    7.00    6.40
 -12 -13  -1  149.39   12.60
  12 -13   1  145.59   10.40
 -12 -13  -1  153.18   13.00
 -12 -13  -1  152.08   13.50
  12 -14  -1  225.68   13.70
 -12 -14   1  239.38   15.20
 -12 -14   1  218.18   15.70
  12  14  -1  222.68   20.00
 -11 -14   1   16.40    6.80
  11 -14  -1   15.80    5.50
 -11 -14   1    9.50    5.00
 -10 -14   1   20.10    7.20
  10 -14  -1   10.50    4.70
  -9 -14   1   -1.80    4.70
  -9 -14   1    5.70    5.00
   9 -14  -1    0.90    3.90
  -8 -14   1  292.87   19.00
  -8 -14   1  289.77   18.10
   8 -14  -1  293.67   15.90
  -7 -14   1    5.10    5.40
   7 -14  -1    3.10    3.70
  -7 -14   1    7.70    6.80
  -6 -14   1   11.50    5.90
  -6 -14   1   21.70    7.30
   6 -14  -1   14.30    5.20
  -5 -14   1   70.29   10.40
  -5 -14   1   54.69    9.70
   5 -14  -1   58.89    8.70
  -4 -14   1  412.16   21.80
   4 -14  -1  394.76   20.50
  -4 -14   1  402.16   20.80
   4 -14  -1  428.86   19.70
  -3 -14   1   31.00    8.10
  -3 -14   1   44.10    8.00
   3 -14  -1   44.10    8.40
   3 -14  -1   41.00    7.50
  -2 -14   1  229.68   15.00
  -2 -14   1  248.68   16.40
   2 -14  -1  258.77   16.60
   2 -14  -1  248.58   15.20
  -1 -14   1   31.50    7.40
  -1 -14   1   45.30    8.20
   1 -14  -1   29.50    7.20
   1 -14  -1   40.00    8.40
   0 -14  -1  387.26   20.80
   0 -14   1  410.56   20.20
   0 -14   1  445.56   21.30
   0 -14  -1  407.46   20.00
  -1 -14  -1    1.10    4.60
   1 -14   1    5.20    4.70
  -1 -14  -1   10.30    5.20
   1 -14   1    8.40    4.60
  -2 -14  -1  148.19   12.40
  -2 -14  -1  133.39   12.50
   2 -14   1  129.99   11.90
   2 -14   1  136.79   11.60
  -3 -14  -1   10.70    5.70
  -3 -14  -1    5.70    4.20
   3 -14   1   12.80    5.80
   3 -14   1   17.20    5.90
  -4 -14  -1   88.09   12.00
   4 -14   1   69.59    9.20
   4 -14   1   71.79   10.20
  -4 -14  -1   72.89   10.30
   5 -14   1   10.20    4.80
  -5 -14  -1    6.10    5.50
   5 -14   1    3.70    4.60
  -5 -14  -1    5.70    5.90
   6 -14   1  219.78   15.20
   6 -14   1  212.98   13.50
  -6 -14  -1  202.68   15.10
  -6 -14  -1  257.27   17.80
  -7 -14  -1   77.29   10.90
   7 -14   1   60.29    9.30
   7 -14   1   63.89    8.70
   8 -14   1   87.49    8.70
  -8 -14  -1   85.29   12.60
  -8 -14  -1   84.89   11.40
   8 -14   1   75.29   13.00
  -9 -14  -1    1.30    6.00
   9 -14   1    4.80    4.10
  -9 -14  -1   -4.80    4.20
 -10 -14  -1  139.79   12.50
 -10 -14  -1  125.39   14.80
  10 -14   1  149.59   11.30
 -10 -14  -1  155.78   13.20
 -11 -14  -1    3.70    5.40
 -11 -14  -1    3.90    5.20
 -11 -14  -1    3.90    7.50
  11 -14   1   -2.60    3.70
 -12 -14  -1   13.00    6.10
  12 -14   1   18.00    5.70
 -12 -14  -1   25.00    7.20
 -12 -14  -1   14.70    7.30
  11 -15  -1   18.40    6.10
 -11 -15   1   18.10    7.20
 -11 -15   1   20.80    6.40
 -10 -15   1  280.07   23.00
  10 -15  -1  258.67   15.50
 -10 -15   1  270.07   18.10
   9 -15  -1   15.70    6.00
  -9 -15   1   35.70    8.70
   8 -15  -1   -0.60    4.40
  -7 -15   1   33.10    8.00
   7 -15  -1   25.50    6.50
  -6 -15   1  100.59   12.70
   6 -15  -1   87.69   10.60
   5 -15  -1   -6.60    4.20
  -5 -15   1   -1.30    4.30
   5 -15  -1    2.00    4.20
  -4 -15   1   36.60    8.20
   4 -15  -1   27.50    7.20
   4 -15  -1   37.10    7.40
   3 -15  -1   23.70    6.80
  -3 -15   1   12.10    6.00
   3 -15  -1   26.90    6.70
  -2 -15   1  266.07   17.10
   2 -15  -1  287.77   18.20
   2 -15  -1  282.37   16.80
  -1 -15   1   35.80    7.50
  -1 -15   1   25.00    6.90
   1 -15  -1   51.59    9.60
   1 -15  -1   30.10    7.40
   0 -15  -1  114.19   11.40
   0 -15   1  135.59   12.70
   0 -15   1  113.49   11.60
   0 -15  -1  100.19   12.60
   1 -15   1    4.50    5.30
   1 -15   1   -2.70    4.10
  -1 -15  -1   -0.10    3.40
   2 -15   1  165.88   13.80
  -2 -15  -1  168.48   13.90
   2 -15   1  176.18   13.60
   3 -15   1   11.00    5.10
  -3 -15  -1   16.40    6.30
   3 -15   1   11.70    5.80
  -4 -15  -1  296.57   19.90
   4 -15   1  302.27   18.20
   4 -15   1  309.47   17.70
  -4 -15  -1  299.67   18.40
   5 -15   1    5.60    4.70
   5 -15   1   -4.00    4.00
  -5 -15  -1   -3.30    3.00
   6 -15   1  193.28   13.90
   6 -15   1  212.08   15.00
  -6 -15  -1  175.98   14.80
  -7 -15  -1    3.90    5.70
   7 -15   1   12.70    5.50
   7 -15   1   15.70    6.60
   8 -15   1  217.58   14.50
   8 -15   1  221.68   15.20
  -8 -15  -1  276.27   21.00
   9 -15   1    5.10    4.50
  -9 -15  -1   11.90    7.60
   9 -15   1   28.50    6.30
  10 -15   1   51.49    8.60
  10 -15   1   46.40    8.40
 -10 -15  -1   56.09   12.10
 -10 -15  -1   65.69   11.10
 -11 -15  -1   15.60    6.70
  11 -15   1   10.70    5.00
 -11 -15  -1    5.30    7.40
 -11 -15  -1    4.90    6.50
 -10 -16   1    6.70    6.70
  10 -16  -1   19.90    6.50
   9 -16  -1   13.30    5.50
  -9 -16   1    7.70    6.20
   8 -16  -1  141.69   12.60
  -8 -16   1  178.98   15.50
   7 -16  -1    1.00    6.10
   7 -16  -1    5.10    4.70
  -7 -16   1   12.80    6.60
   6 -16  -1   41.60    8.10
  -6 -16   1   20.00    9.30
  -5 -16   1   18.20    7.30
   5 -16  -1   37.70    7.80
  -4 -16   1  235.58   17.10
   4 -16  -1  233.88   15.60
   3 -16  -1    7.40    6.80
   3 -16  -1   -2.60    3.90
  -3 -16   1    5.60    5.30
   2 -16  -1  104.09   12.40
   2 -16  -1   98.89   12.90
  -2 -16   1  101.19   12.50
   1 -16  -1   63.79   10.30
  -1 -16   1   38.00    8.70
   1 -16  -1   51.79   10.00
   0 -16  -1  552.84   25.30
   0 -16   1  544.15   26.50
   0 -16   1  554.24   25.40
   0 -16  -1  493.95   25.70
   1 -16   1    2.00    3.70
  -1 -16  -1    6.40    5.50
   1 -16   1    8.70    5.90
  -2 -16  -1  153.38   13.80
   2 -16   1  159.58   13.60
  -3 -16  -1   19.10    7.10
   3 -16   1   33.40    7.80
   4 -16   1   47.90   11.30
   4 -16   1   55.09    9.20
  -4 -16  -1   35.00    8.10
   5 -16   1   -1.00    4.50
  -5 -16  -1   -1.90    5.10
   5 -16   1   -5.20    3.90
  -6 -16  -1  256.37   23.20
   6 -16   1  274.97   16.70
  -6 -16  -1  222.18   20.30
   6 -16   1  253.77   20.80
  -7 -16  -1   32.60    8.50
   7 -16   1   32.70    7.20
   7 -16   1   45.10   10.10
   8 -16   1   21.80    6.70
  -8 -16  -1   24.30    7.80
   9 -16   1    5.20    4.90
  -9 -16  -1    8.20    5.90
 -10 -16  -1  109.29   14.20
  10 -16   1  137.89   16.90
  10 -16   1  156.28   12.90
  -9 -17   1   10.80    6.90
   9 -17  -1    1.50    4.90
   9 -17  -1   16.90    6.70
  -8 -17   1   58.89   11.00
   8 -17  -1   59.49   10.50
   8 -17  -1   77.09   10.50
   7 -17  -1   63.79    9.70
   7 -17  -1   85.09   12.50
  -7 -17   1   77.29   12.00
   6 -17  -1  144.69   14.80
  -6 -17   1  150.98   15.10
   6 -17  -1  151.58   13.30
   5 -17  -1    7.80    5.70
  -5 -17   1    0.60    5.20
   5 -17  -1   -0.40    5.00
  -4 -17   1   30.60    8.00
   4 -17  -1    3.90    6.90
   4 -17  -1   27.00    7.50
  -3 -17   1  134.09   13.90
   3 -17  -1  109.49   12.00
   3 -17  -1  110.79   14.30
   2 -17  -1  308.27   20.60
   2 -17  -1  340.67   20.10
   1 -17  -1    2.40    4.70
  -1 -17   1    7.70    4.30
  -1 -17   1    6.50    6.20
   1 -17  -1   11.40    6.70
   0 -17   1  129.89   14.10
   0 -17   1  140.09   13.90
   0 -17  -1  106.19   14.50
   0 -17  -1  125.59   13.50
   1 -17   1   65.89   11.20
   1 -17   1   63.99   10.60
   2 -17   1   84.49   11.80
   2 -17   1   83.79   12.30
  -3 -17  -1   11.00    6.40
   3 -17   1   11.40    6.20
   3 -17   1    4.40    5.40
   4 -17   1  190.98   16.00
  -4 -17  -1  204.88   16.40
   4 -17   1  231.98   16.10
  -5 -17  -1    8.60    5.70
   5 -17   1   -4.60    5.00
   5 -17   1   11.90    5.90
  -6 -17  -1    8.50    6.40
   6 -17   1   10.40    6.40
   6 -17   1   16.80    7.40
  -7 -17  -1   -1.00    5.00
   7 -17   1    8.20    6.30
   7 -17   1   -9.40    3.80
   8 -17   1  166.48   13.90
  -8 -17  -1  172.68   16.90
   8 -17   1  183.28   16.00
   9 -17   1    3.50    6.20
   9 -17   1   12.20    6.60
  -9 -17  -1    6.10    6.10
  -8 -18   1  123.29   15.10
   8 -18  -1  115.99   12.50
   7 -18  -1   19.40    8.40
  -7 -18   1   11.60    7.30
  -6 -18   1   73.79   12.20
  -5 -18   1   36.80    9.40
   5 -18  -1   45.30   11.10
   4 -18  -1  206.38   19.10
  -4 -18   1  208.58   17.30
   3 -18  -1    3.40    4.90
  -3 -18   1   -9.10    4.60
  -2 -18   1   48.50    9.50
   2 -18  -1   56.99   10.40
   1 -18  -1   66.69   11.10
  -1 -18   1   65.79   11.30
   0 -18  -1  287.27   19.40
   0 -18   1  260.67   18.50
  -1 -18  -1    1.40    5.60
   1 -18   1    0.90    5.20
   2 -18   1  151.18   14.70
  -2 -18  -1  174.38   15.40
  -3 -18  -1   46.60    9.70
  -4 -18  -1   23.90    8.20
  -5 -18  -1   -3.10    5.10
  -6 -18  -1  127.09   15.40
  -7 -18  -1   54.59   11.10
  -8 -18  -1   22.70    8.60
   7 -19  -1   30.60    8.40
  -7 -19   1   40.10   10.10
  -6 -19   1  199.88   18.20
   6 -19  -1  266.17   19.10
  -5 -19   1   10.80    6.60
   5 -19  -1    2.50    5.50
  -4 -19   1   19.00    7.40
   4 -19  -1   17.20    6.70
  -3 -19   1   26.50    8.60
   3 -19  -1   45.50    9.60
   2 -19  -1  130.29   13.60
  -2 -19   1  139.29   15.00
  -1 -19   1   28.80    8.30
   1 -19  -1   29.90    8.20
   0 -19  -1   60.49   10.80
   0 -19   1   66.59   11.70
   1 -19   1   42.30    9.70
  -1 -19  -1   47.30    9.30
   2 -19   1   23.00    8.20
  -2 -19  -1   29.20    8.10
   3 -19   1   -4.20    4.80
  -3 -19  -1    4.80    5.60
  -4 -19  -1   66.09   11.90
   4 -19   1   45.90    9.10
   5 -19   1   73.69   11.70
  -5 -19  -1   87.29   13.30
   6 -19   1   15.60    7.40
  -6 -19  -1    8.00    7.30
   4 -20  -1   60.69   11.50
  -4 -20   1   72.69   12.40
   3 -20  -1    5.10    5.70
  -3 -20   1   16.30    7.80
  -2 -20   1   11.30    7.20
   2 -20  -1   10.80    6.60
  -1 -20   1   33.70    9.80
   1 -20  -1   88.39   13.20
   0 -20  -1  101.09   14.10
   0 -20   1  127.99   15.80
  -1 -20  -1    1.10    6.00
   1 -20   1    1.80    5.50
   2 -20   1   29.60    8.80
  -2 -20  -1   13.80    7.00
  -3 -20  -1   89.19   14.10
   3 -20   1   92.39   13.20
  -4 -20  -1   72.19   12.10
   4 -20   1   52.19   10.90
  16   0  -2   75.99    9.70
  15   0  -2   -7.20    3.00
  15   0  -2   -3.40    2.90
  14   0  -2  207.68   12.30
  14   0  -2  195.18   11.90
  13   0  -2    1.60    2.70
  13   0  -2    1.40    3.40
  12   0  -2  617.84   21.70
  12   0  -2  582.44   20.60
  11   0  -2    0.90    2.70
  11   0  -2    0.20    2.40
  10   0  -2  966.40   26.60
  10   0  -2  949.21   27.80
   9   0  -2    1.00    2.20
   9   0  -2   -2.00    1.60
   8   0  -2  531.75   17.00
   8   0  -2  499.45   15.60
   7   0  -2   -0.80    1.60
   7   0  -2    0.20    1.70
   6   0  -2 3140.49   69.79
   6   0  -2 3299.17   69.19
  -6   0   2 3297.47   65.79
  -5   0   2   -0.40    0.70
   5   0  -2   -0.10    1.00
  -5   0   2    1.30    0.90
   5   0  -2    0.20    1.00
   4   0  -2  260.57    8.10
  -4   0   2  261.27    7.30
   4   0  -2  244.38    7.70
  -3   0   2   -0.30    1.10
   3   0  -2    0.80    1.20
   2   0  -2 1489.75   51.79
  -1   0  -2   -0.50    0.80
   1   0   2   -0.30    0.80
  -1   0  -2    0.80    0.30
   1   0   2    0.20    0.50
   2   0   2 5609.54  127.59
  -2   0  -2 5659.13  127.89
   3   0   2    0.10    0.50
   3   0   2   -0.70    1.60
  -3   0  -2    1.70    1.80
   3   0   2    0.30    0.50
   4   0   2  981.20   25.40
  -4   0  -2  927.51   25.00
   4   0   2  918.61   19.90
  -5   0  -2   -0.50    1.70
   5   0   2    0.10    1.70
   5   0   2   -0.60    0.70
   5   0   2    0.70    0.70
   6   0   2 2970.30   68.89
  -6   0  -2 3070.49   68.99
   6   0   2 2902.41   62.09
   6   0   2 3063.19   61.99
   7   0   2    1.10    1.20
  -7   0  -2   -2.70    1.80
   7   0   2    0.00    1.20
   7   0   2   -0.90    2.00
   8   0   2   29.80    3.10
   8   0   2   29.80    5.20
   8   0   2   34.20    3.10
  -8   0  -2   16.40    4.40
  -9   0  -2   -0.70    2.40
   9   0   2   -4.30    1.90
   9   0   2   -0.80    1.50
   9   0   2   -1.60    1.50
  10   0   2 1210.88   36.60
  10   0   2 1171.98   30.00
 -10   0  -2 1233.78   36.60
  11   0   2    5.80    3.80
  11   0   2    3.20    2.60
  12   0   2   15.30    4.10
  12   0   2   20.10    5.40
  13   0   2   -1.90    2.50
  13   0   2   -2.30    3.60
  14   0   2  375.76   16.10
  14   0   2  360.16   19.60
  15   0   2   -1.60    4.10
  15   0   2    6.80    3.80
  16   0   2  102.59    9.90
  16  -1  -2    1.20    4.00
  16  -1  -2    6.00    4.10
  16   1  -2    1.70    4.90
  15  -1  -2   12.50    4.70
  15  -1  -2   17.40    5.00
  15   1  -2   15.40    5.30
  14  -1  -2  128.39   10.50
  14   1  -2   95.19    9.30
  13  -1  -2    3.70    3.50
  13  -1  -2    5.10    3.30
  13   1  -2    7.80    4.10
  12  -1  -2 1227.38   36.00
  12  -1  -2 1225.98   33.10
  12   1  -2 1236.68   34.00
  12   1  -2 1183.08   34.50
  11  -1  -2   -2.20    2.30
  11  -1  -2   -1.80    2.30
  11   1  -2   -0.20    2.50
  11   1  -2    0.80    2.90
  10  -1  -2  335.17   14.70
  10  -1  -2  351.66   12.70
  10   1  -2  312.87   13.40
  10   1  -2  347.37   13.60
   9  -1  -2   65.49    6.20
   9  -1  -2   70.89    5.20
   9   1  -2   51.09    5.00
   9   1  -2   63.49    5.60
   8  -1  -2  828.12   21.60
   8  -1  -2  822.32   24.40
   8   1  -2  834.72   23.20
   8   1  -2  828.52   22.50
   7  -1  -2  415.96   14.70
   7  -1  -2  422.16   12.60
  -7  -1   2  439.46   11.10
  -7  -1   2  455.65   11.10
   7   1  -2  413.66   13.20
   7   1  -2  430.76   14.00
  -6  -1   2  105.89    4.70
  -6  -1   2  104.29    4.50
   6  -1  -2  118.39    5.20
   6  -1  -2   97.59    6.10
  -6  -1   2  104.89    5.20
   6   1  -2   94.39    5.00
   6   1  -2  103.69    5.80
   5  -1  -2    8.40    2.00
  -5  -1   2    7.40    1.70
  -5  -1   2    6.50    1.40
   5  -1  -2    7.50    1.50
  -5  -1   2    5.80    1.40
   5   1  -2    6.70    1.80
   5   1  -2    7.80    1.60
  -5   1   2    7.10    0.60
  -4  -1   2  566.24   14.40
   4  -1  -2  574.34   14.00
  -4  -1   2  560.74   13.30
   4   1  -2  559.24   15.10
  -4   1   2  582.74   13.00
   4   1  -2  556.84   13.50
  -3  -1   2  332.77    9.50
   3  -1  -2  322.87    9.00
  -3   1   2  351.26    8.70
   3   1  -2  330.67    9.90
  -2  -1   2 1284.07   28.60
   2   1  -2 1299.27   28.80
  -2   1   2 1319.57   27.90
  -1  -1   2    0.30    0.70
  -1  -1   2    0.70    0.50
   1  -1  -2    0.40    0.60
  -1   1   2    3.00    1.20
   1   1  -2    0.10    0.50
   1   1  -2    0.70    0.70
   0   1   2 2826.12   99.79
   1  -1   2   11.00    2.00
   1  -1   2   10.80    0.90
  -1  -1  -2   12.90    1.80
  -1  -1  -2   11.10    1.40
   1   1   2   11.30    1.40
  -1   1  -2   11.00    1.90
  -2  -1  -2  435.06   10.80
   2  -1   2  471.05   13.70
  -2  -1  -2  439.26   10.60
  -2  -1  -2  441.26   12.70
   2   1   2  451.15   12.80
   2   1   2  456.65   11.00
   2   1   2  424.26   11.20
   3  -1   2  966.40   25.50
  -3  -1  -2 1011.20   20.90
  -3  -1  -2  997.90   24.80
   3   1   2  975.30   22.30
   3   1   2  944.51   24.50
  -3   1  -2 1012.50   25.70
   3   1   2  991.30   21.90
   4  -1   2  713.63   20.60
  -4  -1  -2  666.73   19.30
   4   1   2  699.83   16.30
   4   1   2  662.43   16.50
  -4   1  -2  692.13   20.30
   4   1   2  662.33   19.30
   5  -1   2    2.60    2.20
  -5  -1  -2    1.70    1.80
   5   1   2    0.90    1.10
   5   1   2    1.70    1.30
  -5   1  -2    0.20    2.10
   5   1   2   -1.00    1.70
  -6  -1  -2  806.52   23.70
   6  -1   2  778.12   24.60
   6   1   2  806.92   19.60
  -6   1  -2  811.12   24.60
   6   1   2  771.92   19.80
   6   1   2  795.32   23.70
  -7  -1  -2   -0.60    2.00
   7  -1   2    0.10    0.80
   7  -1   2    2.00    0.90
   7  -1   2    3.70    2.80
   7   1   2    0.10    1.50
  -7   1  -2    0.70    2.40
   7   1   2    1.30    2.70
   7   1   2    0.10    1.50
  -8  -1  -2 1140.79   32.10
   8  -1   2 1056.99   32.60
   8  -1   2 1069.69   24.40
   8  -1   2 1072.79   24.30
   8   1   2 1069.49   26.80
   8   1   2 1071.49   27.20
   8   1   2 1114.39   31.70
  -8   1  -2 1089.19   32.30
   9  -1   2    6.80    1.80
   9  -1   2    7.00    3.60
   9  -1   2    5.60    1.70
  -9  -1  -2    6.20    3.40
  -9   1  -2    4.90    4.40
   9   1   2    5.30    3.20
   9   1   2    1.20    2.10
   9   1   2    0.40    1.90
 -10  -1  -2   76.39    8.20
  10  -1   2   90.79    9.00
  10  -1   2   84.09    5.20
  10   1   2   71.89    6.10
  10   1   2   91.49    8.70
  11  -1   2    2.20    2.20
 -11  -1  -2    3.10    4.00
  11  -1   2   -2.00    3.40
  11   1   2    0.70    3.30
  11   1   2    4.90    3.20
  12  -1   2  847.82   24.00
 -12  -1  -2  860.51   30.40
  12  -1   2  904.91   32.00
  12   1   2  887.31   30.40
  12   1   2  864.61   26.40
  13  -1   2   18.00    4.10
  13  -1   2   13.30    5.10
  13   1   2   23.50    6.00
  13   1   2   20.10    4.60
  14  -1   2  267.47   12.60
  14  -1   2  266.97   16.90
  14   1   2  288.67   14.70
  15  -1   2    4.70    3.90
  15  -1   2    0.50    4.70
  15   1   2   -4.20    3.70
  16  -1   2   98.19    8.90
  16  -1   2   92.69   11.90
  16   1   2  119.29   10.50
  16  -2  -2  151.98   11.90
  16  -2  -2  130.99   10.40
  16   2  -2  147.69   12.80
  15  -2  -2   -0.90    3.30
  15  -2  -2    3.00    3.50
  15   2  -2    1.60    4.40
  14  -2  -2   66.69    9.00
  14  -2  -2   69.89    6.90
  14   2  -2   91.29   10.40
  13  -2  -2   -2.40    2.70
  13  -2  -2   -9.20    2.80
  13   2  -2   -5.60    2.50
  12  -2  -2  582.44   18.80
  12  -2  -2  561.74   22.50
  12   2  -2  556.54   21.30
  11  -2  -2   32.20    6.00
  11  -2  -2   25.60    4.10
  11   2  -2   30.10    5.60
  10  -2  -2  162.38    7.90
  10  -2  -2  156.88   10.30
  10   2  -2  155.98    9.50
   9  -2  -2   97.29    7.80
  -9  -2   2   99.49    3.60
   9  -2  -2  106.09    5.80
  -9  -2   2  110.19    6.50
   9   2  -2  105.49    7.30
   8  -2  -2  104.69    7.70
  -8  -2   2  116.19    5.00
  -8  -2   2  104.59    6.00
   8  -2  -2  115.39    5.70
  -8  -2   2  121.89    5.20
   8   2  -2  115.19    7.40
  -7  -2   2  550.74   14.80
  -7  -2   2  559.54   15.10
   7  -2  -2  549.45   18.50
  -7  -2   2  551.84   15.50
   7  -2  -2  571.14   14.80
   7   2  -2  522.75   17.10
   6  -2  -2 2225.88   47.30
   6  -2  -2 2197.88   51.59
  -6  -2   2 2239.88   47.80
  -6  -2   2 2189.78   48.10
  -6  -2   2 2186.68   48.50
   6   2  -2 2186.08   50.29
   5  -2  -2  118.69    4.70
  -5  -2   2  116.29    5.40
  -5  -2   2  113.79    4.60
  -5  -2   2  124.59    5.90
   5   2  -2  113.19    6.10
  -4  -2   2 1432.16   33.50
   4  -2  -2 1475.25   31.70
  -4  -2   2 1442.16   33.00
  -4  -2   2 1455.45   30.80
   4   2  -2 1454.55   33.90
  -3  -2   2 1300.57   30.10
   3  -2  -2 1342.97   28.90
  -3   2   2 1330.77   28.40
   3   2  -2 1291.57   30.50
  -2  -2   2 6336.87  172.98
   2   2  -2 7238.38  176.78
  -1  -2   2  747.33   17.70
   1  -2  -2  711.13   17.10
  -1   2   2  741.73   17.20
   1   2  -2  706.83   17.60
   0  -2   2  583.14   14.00
   0  -2  -2  555.04   14.00
   0   2  -2  579.04   13.90
   0   2   2  575.44   14.20
  -1  -2  -2  110.39    4.50
   1  -2   2  102.59    3.70
   1  -2   2   96.79    5.40
   1   2   2  105.49    4.50
   2  -2   2 2218.18   49.20
  -2  -2  -2 2164.78   46.50
   2   2   2 2142.09   46.80
  -2   2  -2 2141.59   48.90
  -3  -2  -2  828.92   19.70
  -3  -2  -2  834.32   19.40
   3  -2   2  789.82   22.80
  -3  -2  -2  837.22   21.50
  -3   2  -2  825.42   22.90
   3   2   2  833.52   20.00
   3   2   2  826.32   20.50
  -4  -2  -2 1127.79   24.20
   4  -2   2 1019.80   28.70
  -4  -2  -2 1100.69   24.30
  -4  -2  -2 1055.89   27.20
   4   2   2 1109.79   25.40
   4   2   2 1016.50   25.60
  -4   2  -2 1045.30   28.70
  -5  -2  -2  699.83   16.10
   5  -2   2  701.43   22.20
  -5  -2  -2  674.73   16.00
  -5  -2  -2  690.33   20.40
   5   2   2  694.93   18.20
  -5   2  -2  704.53   22.00
   5   2   2  693.73   18.60
   6  -2   2 2122.69   54.79
  -6  -2  -2 2188.68   52.49
   6   2   2 2233.18   52.49
  -6   2  -2 2395.16   55.19
   6   2   2 2194.98   49.90
   6   2   2 2229.18   49.50
  -7  -2  -2    8.60    3.20
   7  -2   2    6.30    3.30
   7   2   2   11.00    2.80
   7   2   2   14.50    3.60
   7   2   2   12.30    2.70
  -8  -2  -2  909.61   27.60
   8  -2   2  846.42   29.00
   8  -2   2  910.01   19.40
   8  -2   2  929.91   19.30
   8   2   2  906.51   24.50
   8   2   2  932.31   27.60
   8   2   2  905.81   24.90
   9  -2   2   84.59    8.60
   9  -2   2   83.59    3.80
  -9  -2  -2   88.89    8.10
   9  -2   2   90.79    3.90
   9   2   2   81.69    6.20
   9   2   2   91.49    6.70
   9   2   2   80.09    7.60
  10  -2   2  933.11   22.40
  10  -2   2  952.90   37.20
  10   2   2  936.21   27.10
  11  -2   2   31.70    6.80
 -11  -2  -2   41.40    6.80
  11  -2   2   25.40    3.40
  11   2   2   28.30    5.10
  12  -2   2  285.57   17.20
  12  -2   2  269.37   10.50
 -12  -2  -2  290.57   16.10
  12   2   2  271.87   13.80
  13  -2   2    8.70    5.10
 -13  -2  -2   15.50    5.50
  13  -2   2   11.40    3.20
  13   2   2    7.70    4.30
  14  -2   2  187.78    9.80
  14  -2   2  174.88   14.50
  14   2   2  170.38   12.10
  15  -2   2   22.30    6.60
  15  -2   2    4.30    3.40
  15   2   2    6.80    4.60
  16  -2   2   61.39    7.50
  16  -2   2   53.99   10.50
  16   2   2   75.39   10.20
  16  -3  -2  140.99   12.70
  16  -3  -2  146.89   10.60
  16   3  -2  162.18   13.50
  15  -3  -2   34.40    6.90
  15   3  -2   33.10    7.50
  14  -3  -2  219.98   11.40
  14  -3  -2  217.88   14.50
  14   3  -2  213.28   14.20
  13  -3  -2   -0.30    3.30
  13  -3  -2   -1.60    2.40
  13   3  -2   -5.20    3.10
  12  -3  -2  389.66   18.70
  12  -3  -2  372.46   13.80
  12   3  -2  376.46   17.60
  11  -3  -2   95.39    9.60
  11  -3  -2  106.79    6.70
  11   3  -2  119.99    9.60
 -10  -3   2  156.28    5.50
  10  -3  -2  149.88   10.60
  10  -3  -2  158.18    7.40
 -10  -3   2  153.48    5.50
 -10  -3   2  157.48    8.20
  10   3  -2  150.48   10.00
  -9  -3   2   65.89    4.30
  -9  -3   2   69.19    5.20
  -9  -3   2   73.19    4.50
   9  -3  -2   71.49    7.30
   9  -3  -2   68.69    4.60
   9   3  -2   68.69    6.60
  -8  -3   2  804.22   20.80
   8  -3  -2  828.02   26.10
   8  -3  -2  800.42   20.20
  -8  -3   2  791.52   21.00
  -8  -3   2  809.22   21.50
   8   3  -2  794.12   24.30
   7  -3  -2   23.90    2.80
   7  -3  -2   22.40    4.40
  -7  -3   2   21.20    3.30
  -7  -3   2   22.00    2.90
  -7  -3   2   21.70    3.10
   7   3  -2   21.20    3.90
   6  -3  -2 1322.27   29.10
  -6  -3   2 1280.77   31.30
  -6  -3   2 1274.87   29.40
  -6  -3   2 1277.97   30.90
   6   3  -2 1251.27   32.80
  -5  -3   2  534.15   16.10
  -5  -3   2  552.74   14.00
   5  -3  -2  565.94   14.20
  -5  -3   2  551.44   15.90
   5   3  -2  554.24   17.10
  -4  -3   2 1823.82   42.00
   4  -3  -2 1835.72   39.50
  -4  -3   2 1787.02   41.40
   4   3  -2 1827.92   42.40
  -4   3   2 1840.52   38.20
  -3  -3   2  218.38    8.30
   3  -3  -2  207.28    7.00
  -3   3   2  215.38    6.70
   3   3  -2  207.98    8.50
  -2  -3   2  157.18    6.90
   2  -3  -2  163.38    6.20
  -2   3   2  167.88    6.10
   2   3  -2  148.49    6.90
   1  -3  -2   16.60    2.40
  -1  -3   2   14.50    2.60
   1   3  -2   14.40    2.60
  -1   3   2   14.60    2.50
   0  -3   2 2204.78   47.50
   0   3  -2 2196.58   47.30
   1  -3   2   48.10    3.20
  -1  -3  -2   49.60    3.80
   1   3   2   49.60    3.60
  -2  -3  -2 5256.87  151.68
   2  -3   2 5196.58  129.19
   2   3   2 5321.17  152.88
  -2   3  -2 5095.79  128.49
  -3  -3  -2 1038.10   24.40
   3  -3   2  995.60   27.60
  -3  -3  -2 1002.00   24.70
   3   3   2 1002.60   25.40
   3   3   2 1013.10   24.90
  -4  -3  -2 1371.76   31.50
  -4  -3  -2 1359.96   31.20
   4  -3   2 1361.96   35.80
  -4  -3  -2 1322.07   33.00
   4   3   2 1363.46   32.20
   4   3   2 1318.67   32.60
  -5  -3  -2  139.49    5.90
  -5  -3  -2  132.59    7.50
  -5  -3  -2  129.39    5.90
   5   3   2  135.89    6.90
   5   3   2  129.89    7.10
  -6  -3  -2  238.08   10.90
  -6  -3  -2  225.28    7.90
  -6  -3  -2  244.48    8.10
   6  -3   2  234.18   12.50
   6   3   2  248.08   10.40
   6   3   2  246.98   10.00
  -7  -3  -2   47.10    2.90
  -7  -3  -2   55.89    5.70
  -7  -3  -2   40.90    2.90
   7  -3   2   39.60    6.30
   7   3   2   44.10    4.70
  -8  -3  -2  734.13   23.70
   8  -3   2  754.52   26.70
   8   3   2  720.23   21.70
   8   3   2  715.93   22.20
   9  -3   2   38.40    6.90
  -9  -3  -2   37.90    6.00
   9  -3   2   46.70    2.10
   9   3   2   48.30    5.90
   9   3   2   47.30    6.00
  10  -3   2  240.38   14.90
  10  -3   2  245.08    7.30
  10   3   2  247.98   12.40
  11  -3   2    5.20    4.20
 -11  -3  -2   -1.80    3.10
  11  -3   2   -1.20    1.40
  11   3   2    4.00    3.30
 -12  -3  -2  661.73   25.10
  12  -3   2  662.03   28.00
  12  -3   2  625.84   17.50
  12   3   2  652.63   23.70
 -13  -3  -2    8.90    4.70
  13  -3   2   18.90    6.10
  13  -3   2   14.60    3.20
  13   3   2   18.80    5.00
  14  -3   2  149.99   14.10
  14  -3   2  160.58    8.50
  14   3   2  177.48   12.30
  15  -3   2   49.00    8.90
  15  -3   2   46.30    5.60
  15   3   2   39.50    7.90
  16  -3   2  104.39    8.00
  16  -3   2   90.89   15.30
  16   3   2   77.89   10.70
  16  -4  -2  252.97   13.20
  16  -4  -2  220.08   15.90
  16   4  -2  239.28   17.20
  15  -4  -2    2.60    5.10
  15  -4  -2   -4.90    3.00
  15   4  -2    7.10    5.20
  14  -4  -2  205.68   10.60
  14  -4  -2  187.38   14.20
  14   4  -2  203.58   14.50
  13  -4  -2  188.68    9.60
  13  -4  -2  194.28   13.90
  13   4  -2  181.28   13.30
  12  -4  -2  620.04   18.90
  12  -4  -2  635.74   26.00
  12   4  -2  610.94   24.20
 -11  -4   2   21.40    2.50
  11  -4  -2   25.80    6.50
 -11  -4   2   20.20    3.90
 -11  -4   2   20.30    2.60
  11  -4  -2   17.30    3.40
  11   4  -2   15.20    5.20
  10  -4  -2   59.29    7.80
 -10  -4   2   56.69    5.20
  10  -4  -2   49.50    4.30
 -10  -4   2   41.30    4.10
 -10  -4   2   56.39    4.20
  10   4  -2   42.90    6.70
  -9  -4   2  101.79    6.10
  -9  -4   2  114.29    6.50
  -9  -4   2  106.39    6.40
   9  -4  -2   96.89    8.80
   9  -4  -2  105.79    5.70
   9   4  -2  106.49    8.70
  -8  -4   2  320.87   11.20
   8  -4  -2  329.87   15.50
   8  -4  -2  310.47   10.20
  -8  -4   2  322.27   11.60
  -8  -4   2  317.17   11.90
   8   4  -2  306.77   14.10
   7  -4  -2   17.40    2.60
  -7  -4   2   10.20    2.20
  -7  -4   2    1.20    3.00
  -7  -4   2   13.50    3.20
   7  -4  -2   12.50    3.90
   7   4  -2    7.90    3.40
  -6  -4   2  297.97   11.70
  -6  -4   2  311.27   11.70
  -6  -4   2  322.57   10.10
   6  -4  -2  317.57    9.80
   6   4  -2  312.37   13.00
  -5  -4   2   31.70    4.20
  -5  -4   2   30.50    4.00
   5  -4  -2   29.00    2.80
   5   4  -2   28.30    4.30
  -4  -4   2   36.30    3.80
  -4  -4   2   37.60    4.60
   4  -4  -2   33.60    2.90
   4   4  -2   30.50    4.20
  -4   4   2   35.40    2.50
  -3  -4   2  830.22   22.60
  -3  -4   2  831.92   22.40
   3  -4  -2  832.02   20.60
  -3   4   2  843.62   20.20
   3   4  -2  821.42   22.80
  -2  -4   2  390.36   12.80
   2  -4  -2  374.46   11.50
  -2   4   2  384.66   11.50
   2   4  -2  386.76   12.90
  -1  -4   2  374.66   12.10
   1  -4  -2  370.76   11.50
   1   4  -2  360.06   11.90
  -1   4   2  371.96   11.50
   0  -4  -2 1647.64   39.20
   0  -4   2 1721.23   39.40
   0   4  -2 1854.61   39.60
   0   4   2 1736.33   39.60
   1  -4   2 5790.52  157.98
  -1  -4  -2 5932.71  171.38
   1   4   2 5749.42  169.98
  -2  -4  -2  552.34   16.20
  -2  -4  -2  533.55   15.60
   2   4   2  536.95   15.90
  -3  -4  -2   44.50    3.90
   3  -4   2   46.40    5.20
  -3  -4  -2   41.10    4.00
   3   4   2   43.60    4.30
   3   4   2   46.00    4.10
  -4  -4  -2   63.79    5.00
  -4  -4  -2   53.99    4.30
   4  -4   2   59.79   11.20
   4   4   2   57.69    4.80
   4   4   2   49.99    4.80
  -5  -4  -2  532.05   15.70
  -5  -4  -2  527.15   17.00
  -5  -4  -2  503.75   15.20
   5  -4   2  514.55   19.50
   5   4   2  515.55   17.10
  -6  -4  -2 1641.74   41.10
   6  -4   2 1589.14   44.80
  -6  -4  -2 1622.84   38.30
  -6  -4  -2 1695.33   38.40
   6   4   2 1677.13   40.70
   6   4   2 1678.03   41.40
   7  -4   2  394.46   18.10
  -7  -4  -2  410.16   12.50
  -7  -4  -2  434.36   16.10
  -7  -4  -2  397.96   12.50
   7   4   2  387.86   14.80
   7   4   2  398.16   15.40
  -8  -4  -2  149.09    9.50
   8  -4   2  157.58   11.70
  -8  -4  -2  158.28    6.40
  -8  -4  -2  150.78    6.20
   8   4   2  152.78    9.20
   8   4   2  158.38    9.50
   9  -4   2   56.39    2.10
   9  -4   2   55.69    8.60
  -9  -4  -2   54.89    2.40
  -9  -4  -2   53.39    6.90
   9   4   2   54.69    6.80
   9   4   2   53.99    6.60
  10  -4   2  170.08    5.20
  10  -4   2  145.19   12.60
  11  -4   2   56.99    3.40
 -11  -4  -2   51.69    7.30
  11  -4   2   61.89    9.50
  11   4   2   38.10    6.60
 -12  -4  -2  174.38   12.40
  12  -4   2  185.18   14.60
  12  -4   2  158.28    6.60
  12   4   2  157.18   11.60
  13  -4   2  100.29   12.70
 -13  -4  -2  126.49   10.80
  13  -4   2  121.49    6.20
  13   4   2   91.49    9.50
  14  -4   2  170.18    8.00
 -14  -4  -2  139.89   12.00
  14  -4   2  140.49   14.10
  14   4   2  168.98   13.00
  15  -4   2   -6.00    5.80
  15  -4   2    1.20    2.60
  15   4   2    0.00    4.60
  16  -4   2   11.80    7.40
  16  -4   2   27.90    4.70
  16   4   2   12.60    7.00
  16  -5  -2   59.19   10.00
  16  -5  -2   76.69    7.90
  16   5  -2   62.69   11.30
  15  -5  -2   50.69    9.40
  15  -5  -2   55.19    6.60
  15   5  -2   70.29   11.00
  14  -5  -2  159.88   13.90
  14  -5  -2  198.58   10.10
  14   5  -2  189.58   14.70
  13  -5  -2    2.90    4.30
  13  -5  -2    8.00    3.10
  13   5  -2    6.80    4.60
 -12  -5   2  517.85   17.60
  12  -5  -2  476.25   23.10
  12  -5  -2  522.25   16.50
 -12  -5   2  495.35   13.30
 -12  -5   2  522.75   13.40
  12   5  -2  492.95   22.40
  11  -5  -2  202.48   14.30
 -11  -5   2  201.98    9.90
  11  -5  -2  195.78    8.90
 -11  -5   2  205.08    8.70
 -11  -5   2  209.48    8.90
  11   5  -2  198.38   13.60
 -10  -5   2  213.78    9.70
  10  -5  -2  178.78   15.80
  10  -5  -2  206.58    8.60
 -10  -5   2  205.18    9.50
  10   5  -2  205.78   13.00
  -9  -5   2   -1.30    2.70
   9  -5  -2    0.60    3.00
  -9  -5   2    1.60    1.90
   9  -5  -2   -0.40    1.70
  -9  -5   2   -0.20    2.20
   9   5  -2   -0.80    2.70
  -8  -5   2  437.16   15.30
  -8  -5   2  440.96   14.20
   8  -5  -2  433.66   13.20
  -8  -5   2  468.55   15.90
   8  -5  -2  440.26   19.20
  -7  -5   2   63.89    5.70
  -7  -5   2   65.79    4.80
  -7  -5   2   74.39    5.80
   7  -5  -2   68.89    4.50
   7   5  -2   65.79    6.70
   6  -5  -2  158.38    6.80
  -6  -5   2  152.98    8.80
  -6  -5   2  151.38    8.50
   6   5  -2  164.98    9.60
  -5  -5   2    6.20    2.70
   5  -5  -2    4.50    1.80
  -5  -5   2    5.90    2.70
   5   5  -2    1.90    2.50
  -4  -5   2 2119.19   54.49
  -4  -5   2 2236.98   51.69
   4  -5  -2 2233.28   48.60
   4   5  -2 2224.18   52.39
  -4   5   2 2158.68   47.40
  -3  -5   2  170.98    8.50
   3  -5  -2  169.58    7.20
  -3  -5   2  168.78    8.50
  -3   5   2  171.18    7.00
   3   5  -2  164.78    8.60
   2  -5  -2  100.89    5.50
  -2  -5   2   97.19    6.20
  -2  -5   2   83.29    5.70
  -2   5   2   98.09    5.50
   2   5  -2   99.99    6.20
   1  -5  -2   35.20    3.40
  -1  -5   2   39.40    4.50
   1   5  -2   32.50    4.00
  -1   5   2   33.90    3.60
   0  -5  -2 1831.72   42.40
   0  -5   2 1838.52   42.40
   0   5  -2 1785.52   42.00
   0   5   2 1857.81   42.60
  -1  -5  -2 4051.29   87.99
   1   5   2 4093.39   87.59
  -2  -5  -2   55.49    4.70
  -2  -5  -2   63.29    4.90
   2   5   2   59.59    5.00
  -3  -5  -2  571.54   17.90
  -3  -5  -2  585.74   17.40
   3   5   2  566.64   20.30
   3   5   2  557.84   18.30
   4  -5   2 1420.06   39.50
  -4  -5  -2 1403.86   35.70
  -4  -5  -2 1480.95   35.30
   4   5   2 1444.66   36.20
   4   5   2 1385.56   36.60
  -5  -5  -2  685.33   20.90
  -5  -5  -2  746.33   20.80
   5  -5   2  743.53   25.50
   5   5   2  706.73   21.80
   5   5   2  697.13   22.30
   6  -5   2   35.00    6.20
  -6  -5  -2   35.90    4.60
  -6  -5  -2   36.30    4.50
  -6  -5  -2   35.50    5.10
   6   5   2   36.10    5.60
   6   5   2   26.40    4.60
  -7  -5  -2  388.96   15.50
  -7  -5  -2  398.86   13.60
  -7  -5  -2  374.26   13.20
   7  -5   2  421.66   19.40
   7   5   2  386.66   15.60
   7   5   2  390.46   16.10
   8  -5   2 1076.39   42.40
  -8  -5  -2 1139.59   28.50
  -8  -5  -2 1170.88   28.60
  -8  -5  -2 1166.98   32.80
   8  -5   2 1127.79   24.40
   8   5   2 1133.09   33.30
   8   5   2 1128.29   32.50
   9  -5   2    1.90    3.70
  -9  -5  -2    4.20    2.10
   9  -5   2    2.50    1.00
  -9  -5  -2    3.10    3.00
  -9  -5  -2    0.30    1.80
   9   5   2    3.70    3.20
  10  -5   2  197.18   15.00
 -10  -5  -2  207.88    6.50
  10  -5   2  205.88    6.30
 -10  -5  -2  204.58    6.50
 -10  -5  -2  196.88   14.60
  10   5   2  219.38   12.80
 -11  -5  -2  319.77   16.20
  11  -5   2  342.07   19.90
  11  -5   2  342.27    9.40
  11   5   2  321.17   16.90
  12  -5   2  357.06   10.50
 -12  -5  -2  356.06   17.60
  12  -5   2  347.47   20.90
  12   5   2  361.16   18.30
  13  -5   2    4.20    5.00
 -13  -5  -2    5.90    4.30
  13  -5   2    1.30    1.70
  13   5   2    5.60    4.60
 -14  -5  -2   67.69    9.20
  14  -5   2   87.49    5.60
  14  -5   2   85.59   12.80
  14   5   2   89.49   11.40
 -15  -5  -2  123.59   11.40
  15  -5   2  105.09   14.20
  15  -5   2  110.79    6.80
  15   5   2  128.49   12.60
  16  -6  -2  105.99   13.60
  16  -6  -2  115.39    8.70
  16   6  -2  103.29   13.90
  15  -6  -2   27.40    5.00
  15  -6  -2   18.50    7.90
  15   6  -2   20.40    7.80
  14  -6  -2   24.30    7.40
  14  -6  -2   23.10    4.50
  14   6  -2   10.10    5.50
 -13  -6   2   89.39    4.00
 -13  -6   2   81.69    4.40
  13  -6  -2   82.29    6.60
  13  -6  -2   88.09   11.80
 -13  -6   2   86.59    6.90
  13   6  -2  105.89   11.30
 -12  -6   2  724.03   20.80
  12  -6  -2  743.53   30.60
 -12  -6   2  740.93   22.70
 -12  -6   2  749.23   20.80
  12  -6  -2  745.43   21.60
  12   6  -2  823.42   30.40
 -11  -6   2   93.99    7.00
  11  -6  -2   94.79   10.70
  11  -6  -2   98.79    6.30
 -11  -6   2   83.69    6.80
 -11  -6   2   84.79    6.70
  11   6  -2   90.99    9.90
  10  -6  -2   11.80    3.00
 -10  -6   2   17.20    3.40
 -10  -6   2   13.90    3.80
 -10  -6   2   18.30    4.10
  10  -6  -2   12.30    4.80
  10   6  -2   13.20    4.80
  -9  -6   2  165.98    9.60
  -9  -6   2  167.48    9.50
   9  -6  -2  141.79   14.50
  -9  -6   2  173.68    8.70
   9  -6  -2  168.98    7.80
   9   6  -2  168.58   11.50
  -8  -6   2  235.68    9.90
  -8  -6   2  247.98   11.70
   8  -6  -2  253.37    9.50
  -8  -6   2  232.88   11.30
   8   6  -2  236.98   13.30
  -7  -6   2   82.09    6.90
   7  -6  -2   93.69    5.60
  -7  -6   2  100.09    6.00
  -7  -6   2  102.09    7.40
   7   6  -2   97.09    8.30
  -6  -6   2  449.76   16.50
   6  -6  -2  475.95   14.20
  -6  -6   2  451.05   16.70
   6   6  -2  457.15   18.10
  -5  -6   2 1114.89   31.00
   5  -6  -2 1139.49   28.10
  -5  -6   2 1109.69   31.10
   5   6  -2 1161.68   32.50
  -4  -6   2  697.33   21.80
   4  -6  -2  695.53   19.40
  -4  -6   2  692.63   21.80
   4   6  -2  721.43   22.80
  -3  -6   2   39.00    4.90
  -3  -6   2   36.80    5.00
   3  -6  -2   37.90    4.10
   3   6  -2   42.10    5.70
  -3   6   2   34.80    3.80
   2  -6  -2  905.81   24.10
  -2  -6   2  903.61   25.50
  -2  -6   2  919.11   25.60
   2   6  -2  877.11   25.70
  -2   6   2  919.91   24.20
   1  -6  -2  415.66   14.00
  -1  -6   2  413.66   14.60
  -1   6   2  417.76   14.10
   1   6  -2  415.46   14.70
   0  -6   2   46.40    4.60
   0  -6  -2   45.60    4.60
   0   6   2   49.60    4.50
  -1  -6  -2 2039.40   48.20
   1  -6   2 2083.19   47.70
  -1  -6  -2 2097.79   49.90
   1   6   2 2013.70   48.60
  -2  -6  -2  626.74   19.10
  -2  -6  -2  625.84   19.80
   2   6   2  596.54   19.40
  -3  -6  -2  586.44   18.70
  -3  -6  -2  584.74   19.30
   3   6   2  611.04   19.50
  -4  -6  -2  179.18    9.50
  -4  -6  -2  162.98    8.80
   4   6   2  176.78   10.10
   4   6   2  178.78    9.70
  -5  -6  -2  596.94   19.20
   5  -6   2  552.44   22.30
  -5  -6  -2  548.65   18.20
   5   6   2  582.14   20.30
   5   6   2  574.04   19.80
  -6  -6  -2  539.95   18.50
  -6  -6  -2  508.95   17.00
   6  -6   2  477.45   21.20
  -6  -6  -2  516.75   17.50
   6   6   2  519.45   18.90
   6   6   2  470.95   18.70
  -7  -6  -2   65.59    5.80
  -7  -6  -2   61.69    6.40
   7  -6   2   52.49    3.60
  -7  -6  -2   51.29    5.50
   7  -6   2   44.70    9.30
   7   6   2   61.59    9.30
   7   6   2   50.69    6.70
  -8  -6  -2    5.00    2.90
  -8  -6  -2    1.70    2.60
   8  -6   2    1.00    1.40
   8  -6   2   -4.90    3.70
  -8  -6  -2    0.60    2.90
   8   6   2    1.20    3.20
   8   6   2    4.00    3.60
   9  -6   2   41.00    8.20
  -9  -6  -2   37.10    6.30
   9  -6   2   39.70    2.90
  -9  -6  -2   34.40    4.50
   9   6   2   43.10    6.70
   9   6   2   37.20    7.00
 -10  -6  -2  108.79    6.30
 -10  -6  -2  118.19    6.60
  10  -6   2  117.49    5.00
  10  -6   2  125.29   12.50
 -10  -6  -2  117.79    9.80
  10   6   2  116.69   10.70
 -11  -6  -2   41.90    3.00
 -11  -6  -2   40.30    2.90
 -11  -6  -2   47.60    7.30
  11  -6   2   42.10    9.30
  11  -6   2   30.70    3.00
  11   6   2   33.10    7.40
  12  -6   2   39.20    3.30
  12  -6   2   34.70    8.50
 -12  -6  -2   27.00    6.50
  12   6   2   38.70    7.30
  13  -6   2  186.28    7.30
  13  -6   2  174.78   15.80
 -13  -6  -2  181.18   13.00
  13   6   2  183.98   13.70
  14  -6   2   11.20    2.60
 -14  -6  -2   19.70    5.90
  14   6   2    9.90    6.10
 -15  -6  -2   -0.90    4.30
  15  -6   2   -5.80    6.70
  15  -6   2    8.30    2.80
  15   6   2   -9.90    4.70
  16  -7  -2   25.70    5.30
  15  -7  -2  290.87   14.30
  15  -7  -2  271.27   20.50
  15   7  -2  321.77   20.50
  14  -7  -2   20.90    7.30
 -14  -7   2   23.20    4.10
  14  -7  -2   22.80    4.50
  14   7  -2   22.90    7.60
 -13  -7   2   10.60    3.10
  13  -7  -2    9.10    5.30
 -13  -7   2    7.80    3.20
  13  -7  -2    9.30    3.30
 -13  -7   2   11.90    3.40
  13   7  -2    8.90    5.40
  12  -7  -2  126.59   13.00
 -12  -7   2  120.29    8.30
 -12  -7   2  109.19    7.70
 -12  -7   2  117.59    8.10
  12  -7  -2  110.59    7.40
  12   7  -2   94.59   12.00
 -11  -7   2  182.08    9.80
  11  -7  -2  173.78    8.90
 -11  -7   2  179.08   10.10
  11  -7  -2  163.68   14.40
  11   7  -2  191.18   14.00
  10  -7  -2   37.10    8.30
 -10  -7   2   39.60    6.00
 -10  -7   2   41.60    6.00
  10  -7  -2   40.80    4.90
 -10  -7   2   41.90    5.20
  10   7  -2   40.20    7.70
  -9  -7   2  179.68    9.20
   9  -7  -2  201.38   14.10
  -9  -7   2  188.88   10.60
  -9  -7   2  174.88   10.40
   9  -7  -2  184.68    8.70
   9   7  -2  174.08   12.60
  -8  -7   2   14.20    4.30
  -8  -7   2   16.70    4.30
   8  -7  -2   20.40    3.40
  -8  -7   2   19.90    3.50
   8   7  -2   21.10    5.50
  -7  -7   2  288.47   13.40
   7  -7  -2  280.57   10.80
  -7  -7   2  280.97   13.50
   7   7  -2  301.97   15.20
  -6  -7   2   10.60    3.50
   6  -7  -2    8.30    2.60
   6   7  -2    6.70    3.80
  -5  -7   2  252.17   12.40
   5  -7  -2  261.87   10.40
  -5  -7   2  273.27   12.80
   4  -7  -2  889.21   23.90
  -4  -7   2  864.71   26.10
  -4  -7   2  833.92   26.00
   4   7  -2  850.01   27.00
   3  -7  -2  433.96   14.80
  -3  -7   2  423.46   16.20
  -3  -7   2  432.96   16.40
  -3   7   2  423.76   14.40
   3   7  -2  412.96   16.40
   2  -7  -2   32.10    4.40
  -2  -7   2   33.90    5.00
  -2  -7   2   23.80    4.50
   2   7  -2   23.20    4.50
  -2   7   2   18.30    3.50
   1  -7  -2   67.49    5.60
  -1  -7   2   54.89    5.70
  -1  -7   2   68.29    6.10
   1   7  -2   62.89    6.00
  -1   7   2   60.99    5.50
   0  -7  -2  538.95   17.70
   0  -7   2  512.75   17.70
   0  -7   2  521.95   17.60
   0   7   2  547.85   18.10
   1  -7   2  793.72   23.10
   1  -7   2  786.42   23.80
  -1  -7  -2  814.52   24.70
  -1  -7  -2  818.02   23.90
   1   7   2  821.12   24.40
  -2  -7  -2  209.48   10.20
   2  -7   2  226.48   10.00
  -2  -7  -2  211.08   11.00
   2   7   2  209.48   10.80
  -3  -7  -2  910.61   26.20
  -3  -7  -2  899.51   26.90
   3   7   2  860.61   26.50
  -4  -7  -2  833.82   25.30
  -4  -7  -2  894.51   26.50
   4   7   2  831.62   26.90
   4   7   2  873.41   26.70
   5  -7   2  603.44   17.40
  -5  -7  -2  616.44   21.00
   5  -7   2  609.64   24.20
  -5  -7  -2  619.84   20.30
   5   7   2  604.94   25.70
   5   7   2  583.84   21.20
   6  -7   2   18.90    5.70
   6  -7   2   18.40    3.00
  -6  -7  -2   25.00    4.50
  -6  -7  -2   23.00    4.80
   6   7   2   24.30    5.30
   7  -7   2  415.36   20.80
   7  -7   2  399.16   12.60
  -7  -7  -2  391.86   15.80
  -7  -7  -2  399.16   16.60
  -7  -7  -2  427.46   16.00
   7   7   2  415.96   17.80
   7   7   2  439.16   18.70
  -8  -7  -2  307.77   13.20
  -8  -7  -2  309.47   15.20
  -8  -7  -2  313.47   13.60
   8  -7   2  304.17   18.20
   8  -7   2  312.97   10.20
   8   7   2  318.77   16.40
   8   7   2  276.17   14.90
  -9  -7  -2  163.38    9.30
   9  -7   2  180.38   14.80
  -9  -7  -2  168.18    9.40
  -9  -7  -2  180.18   11.40
   9  -7   2  165.98    6.80
   9   7   2  169.98   12.30
 -10  -7  -2   27.60    4.60
  10  -7   2   49.20    3.70
 -10  -7  -2   46.60    7.20
  10  -7   2   47.20    9.20
 -10  -7  -2   40.90    5.00
  10   7   2   27.80    7.10
  11  -7   2  333.97   21.00
 -11  -7  -2  354.46   12.30
 -11  -7  -2  351.16   17.20
 -11  -7  -2  344.07   12.20
  11  -7   2  359.36   11.00
  11   7   2  349.67   19.20
 -12  -7  -2   80.59    3.40
 -12  -7  -2   91.19    9.50
  12  -7   2   85.49   12.60
  12  -7   2   76.99    4.80
  12   7   2   97.89   10.50
  13  -7   2   69.19   11.90
 -13  -7  -2   64.29    8.80
  13  -7   2   70.19    4.70
  13   7   2   65.99   10.40
 -14  -7  -2   44.90    7.60
  14  -7   2   40.10    4.10
  14  -7   2   55.49   10.50
  14   7   2   37.20    8.70
  15  -7   2   90.79    5.90
 -15  -7  -2   77.69    9.80
  15  -7   2  114.09   15.50
  15   7   2  105.29   13.70
  15  -8  -2   26.30    8.40
  15  -8  -2   27.50    5.80
 -14  -8   2   32.00    3.80
  14  -8  -2   40.50    9.50
  14  -8  -2   35.00    5.30
 -14  -8   2   34.90    4.10
 -14  -8   2   27.60    4.70
  14   8  -2   32.90    8.70
  13  -8  -2  282.87   12.40
  13  -8  -2  343.07   21.70
 -13  -8   2  283.87   12.80
 -13  -8   2  278.77   12.20
  13   8  -2  260.47   18.80
 -12  -8   2  190.48   10.40
 -12  -8   2  188.28   10.70
  12  -8  -2  186.58    9.70
  12  -8  -2  186.28   16.10
 -12  -8   2  174.68   10.70
  12   8  -2  183.88   14.90
  11  -8  -2   29.90    8.00
 -11  -8   2   24.50    4.40
 -11  -8   2   16.20    5.00
  11  -8  -2   16.70    3.90
  11   8  -2   18.90    6.50
 -10  -8   2   25.20    4.50
 -10  -8   2   23.80    5.20
  10  -8  -2   30.40    7.30
  10  -8  -2   25.10    4.20
 -10  -8   2   31.90    5.60
  10   8  -2   32.30    7.30
   9  -8  -2  261.87   17.10
  -9  -8   2  290.17   14.40
  -9  -8   2  284.27   12.20
   9  -8  -2  258.57   11.10
  -9  -8   2  257.47   13.30
   9   8  -2  270.07   16.10
   8  -8  -2    2.40    2.40
  -8  -8   2    1.10    3.40
  -8  -8   2    4.90    3.80
   8   8  -2    0.90    3.60
   7  -8  -2  134.49    7.80
  -7  -8   2  132.59    9.60
  -7  -8   2  144.49   10.10
   7   8  -2  134.79   10.80
  -6  -8   2  278.17   13.70
   6  -8  -2  279.77   11.40
   6   8  -2  264.47   14.70
  -5  -8   2  548.55   20.30
  -5  -8   2  527.75   20.20
   5  -8  -2  567.34   18.00
   5   8  -2  558.94   21.60
  -4  -8   2    2.40    3.10
  -4  -8   2    1.60    2.90
   4  -8  -2    4.60    2.80
   4   8  -2    7.60    3.80
  -3  -8   2  130.49   10.90
   3  -8  -2  143.29    8.30
  -3  -8   2  136.29    9.30
   3   8  -2  138.29   11.30
  -2  -8   2 1071.99   31.30
  -2  -8   2 1139.19   31.90
   2  -8  -2 1096.39   30.10
   2   8  -2 1120.19   32.10
  -2   8   2 1078.99   30.10
  -1  -8   2  895.01   26.70
  -1  -8   2  865.51   26.30
   1  -8  -2  838.32   25.30
  -1   8   2  882.41   26.00
   0  -8  -2   39.50    5.70
   0  -8   2   44.20    5.90
   0  -8  -2   45.50    6.30
   0  -8   2   58.19    6.10
   0   8   2   37.40    5.60
   1  -8   2   28.40    4.80
   1  -8   2   32.50    5.10
  -1  -8  -2   20.30    4.50
  -1  -8  -2   31.90    5.40
   1   8   2   26.60    5.00
   2  -8   2   10.30    3.10
   2  -8   2   11.10    3.40
  -2  -8  -2    9.20    3.60
  -2  -8  -2   10.60    3.50
   2   8   2    9.30    3.80
   3  -8   2   95.99    6.90
  -3  -8  -2   95.29    7.70
   3   8   2   97.79    8.20
  -4  -8  -2   23.70    4.90
   4  -8   2   23.90    4.00
  -4  -8  -2   17.00    4.50
  -5  -8  -2  540.15   19.50
   5  -8   2  528.85   16.90
  -5  -8  -2  566.64   20.50
   5   8   2  484.55   20.50
   5   8   2  544.65   20.80
  -6  -8  -2  101.29    8.40
   6  -8   2   86.79    6.00
  -6  -8  -2   90.29    8.00
   6  -8   2   99.29   10.20
   6   8   2   84.69    8.60
   6   8   2   94.79    8.60
  -7  -8  -2  158.08    9.70
   7  -8   2  116.79   11.80
   7  -8   2  154.08    7.70
  -7  -8  -2  154.28   10.00
   7   8   2  160.98   11.30
   7   8   2  155.98   11.60
  -8  -8  -2    8.30    4.00
   8  -8   2    7.60    5.40
  -8  -8  -2   20.80    4.90
  -8  -8  -2   14.00    4.20
   8  -8   2   14.00    3.00
   8   8   2   13.80    4.80
   8   8   2   14.10    5.20
   9  -8   2  196.78   16.00
  -9  -8  -2  195.68   11.00
   9  -8   2  178.88    7.90
  -9  -8  -2  210.78   12.50
  -9  -8  -2  175.98   10.60
   9   8   2  173.08   13.00
 -10  -8  -2   28.80    6.00
 -10  -8  -2   27.50    4.80
  10  -8   2   26.30    7.70
  10  -8   2   23.20    3.40
  10   8   2   29.90    7.00
 -11  -8  -2   -1.30    2.60
 -11  -8  -2   -1.30    2.90
  11  -8   2   -0.40    1.90
 -11  -8  -2    1.60    3.00
  11  -8   2   -7.40    5.00
  11   8   2    5.40    4.80
  12  -8   2   -1.60    1.80
 -12  -8  -2    0.10    2.30
 -12  -8  -2    0.30    2.40
 -12  -8  -2   -1.40    3.20
  12  -8   2   -7.20    4.10
  12   8   2   -0.50    5.10
  13  -8   2  188.28   17.60
  13  -8   2  148.59    7.20
 -13  -8  -2  150.18   12.30
  13   8   2  170.08   14.20
  14  -8   2   54.39   12.00
 -14  -8  -2   41.30    7.70
  14  -8   2   39.20    4.20
  14   8   2   35.00    8.60
  15  -8   2    1.80    2.50
 -15  -8  -2    3.10    4.70
 -15  -9   2   60.69    3.70
  15  -9  -2   49.20   10.80
  15  -9  -2   71.19    7.10
  15   9  -2   46.80   11.40
 -14  -9   2   17.10    3.90
  14  -9  -2   20.00    8.50
  14  -9  -2   17.00    4.30
 -14  -9   2   17.90    4.10
  13  -9  -2    4.60    6.50
 -13  -9   2    0.30    3.60
 -13  -9   2    2.80    3.10
  13   9  -2   -2.40    5.60
 -12  -9   2   86.09    8.60
 -12  -9   2   94.99    8.90
  12  -9  -2   98.39    7.50
 -12  -9   2   98.89    8.10
  12  -9  -2   89.29   12.80
  12   9  -2   82.69   12.20
 -11  -9   2  610.84   22.50
  11  -9  -2  609.94   19.90
 -11  -9   2  641.84   21.20
 -11  -9   2  611.84   22.60
  11  -9  -2  633.14   29.60
  11   9  -2  561.74   27.20
  10  -9  -2   75.29    6.60
 -10  -9   2   74.69    9.00
  10  -9  -2   55.79    9.80
 -10  -9   2   79.09    7.20
 -10  -9   2   84.79    8.90
  10   9  -2   64.99   10.30
  -9  -9   2  153.18   10.70
   9  -9  -2  138.59    8.50
  -9  -9   2  156.38    9.50
  -9  -9   2  151.08   11.20
   9   9  -2  147.39   12.60
  -8  -9   2    8.30    4.20
  -8  -9   2    7.60    4.50
   8  -9  -2    7.20    3.30
   8   9  -2    8.20    4.90
   7  -9  -2  778.22   23.60
  -7  -9   2  820.82   27.40
  -7  -9   2  823.62   27.50
   7   9  -2  798.82   29.10
  -6  -9   2   31.90    6.10
   6  -9  -2   37.00    5.10
  -6  -9   2   41.80    6.70
   6   9  -2   39.00    7.30
   5  -9  -2  195.18   10.20
  -5  -9   2  198.98   12.00
  -5  -9   2  185.28   11.70
   5   9  -2  173.08   12.20
   4  -9  -2  305.17   13.30
  -4  -9   2  300.07   15.00
  -4  -9   2  329.87   15.30
   4   9  -2  321.47   15.90
  -3  -9   2  792.72   26.60
   3  -9  -2  869.01   25.50
   3   9  -2  844.32   27.90
   2  -9  -2  158.78    9.50
  -2  -9   2  162.58   10.40
  -2  -9   2  150.78   10.10
   2   9  -2  142.89   10.10
   1  -9  -2  201.98   11.20
  -1  -9   2  223.68   12.10
  -1   9   2  200.48   11.10
   0  -9   2  515.25   18.70
   0  -9   2  478.75   18.30
   0  -9  -2  476.75   19.00
   0  -9  -2  464.35   21.10
   0   9   2  465.05   18.40
   1  -9   2  156.98    9.90
   1  -9   2  159.58    9.70
  -1  -9  -2  166.48   10.20
  -1  -9  -2  168.18   10.50
   1   9   2  153.58   10.30
   2  -9   2  381.26   15.50
  -2  -9  -2  443.16   18.60
   2  -9   2  396.86   16.00
  -2  -9  -2  411.76   16.80
   2   9   2  398.16   19.90
   3  -9   2 1902.11   46.60
  -3  -9  -2 1836.92   47.70
   3  -9   2 1803.42   45.60
   3   9   2 1822.32   49.00
  -4  -9  -2  170.48   11.20
  -4  -9  -2  149.49   10.10
   4  -9   2  149.39    8.80
   4   9   2  152.78   11.00
   5  -9   2  237.98   10.80
  -5  -9  -2  216.38   12.20
  -5  -9  -2  236.38   13.30
   5   9   2  224.68   13.40
   6  -9   2   -3.70    3.50
  -6  -9  -2    2.80    3.40
  -6  -9  -2    0.80    2.80
   6  -9   2   -1.50    2.00
   6   9   2    1.60    3.80
   6   9   2   -0.60    3.20
   7  -9   2  450.55   23.10
   7  -9   2  445.46   15.20
  -7  -9  -2  425.26   18.30
  -7  -9  -2  419.06   17.90
   7   9   2  399.56   19.30
   7   9   2  432.26   20.40
  -8  -9  -2  293.77   15.10
   8  -9   2  317.47   19.90
  -8  -9  -2  302.27   14.50
   8  -9   2  294.07   11.80
  -8  -9  -2  287.67   14.70
   8   9   2  300.47   17.30
  -9  -9  -2    3.60    3.80
   9  -9   2    3.20    4.80
   9  -9   2    3.60    2.50
  -9  -9  -2    4.30    4.00
  -9  -9  -2    1.70    3.80
   9   9   2    2.00    4.60
  10  -9   2   21.60    7.50
 -10  -9  -2   21.70    5.60
  10  -9   2   25.90    3.90
 -10  -9  -2   19.10    4.90
  10   9   2   35.00    8.20
 -11  -9  -2  437.96   19.60
 -11  -9  -2  336.37   15.20
 -11  -9  -2  392.46   15.80
  11  -9   2  383.56   13.20
  11  -9   2  348.27   23.40
  11   9   2  400.96   21.70
 -12  -9  -2   15.40    5.20
  12  -9   2   15.30    3.40
  12  -9   2   24.20    8.30
 -12  -9  -2    5.00    3.40
  12   9   2   10.90    5.90
 -13  -9  -2   42.40    7.90
 -13  -9  -2   35.20    4.30
  13  -9   2   38.10    4.50
  13  -9   2   30.10    9.80
 -13  -9  -2   36.40    4.10
  13   9   2   34.40    9.10
  14  -9   2   15.80    3.40
 -14  -9  -2   10.80    5.50
 -14 -10   2   -4.10    3.40
  14 -10  -2    0.80    3.50
 -14 -10   2   -5.30    2.50
  14 -10  -2   -6.00    6.10
  14  10  -2    1.40    4.90
 -13 -10   2  194.18   12.10
 -13 -10   2  200.18   12.30
  13 -10  -2  174.88   10.60
 -13 -10   2  185.48   11.00
  13 -10  -2  189.48   18.30
 -12 -10   2  107.09    9.80
  12 -10  -2  104.09   17.70
  12 -10  -2  119.99    8.80
 -12 -10   2  112.89    8.90
 -12 -10   2  108.89    9.90
  12  10  -2   82.79   12.80
  11 -10  -2   15.70    7.50
  11 -10  -2    4.50    4.10
 -11 -10   2    5.50    4.40
 -11 -10   2    6.80    4.60
 -11 -10   2    6.60    3.70
  11  10  -2    9.20    6.10
 -10 -10   2   70.09    7.40
 -10 -10   2   71.29    9.20
  10 -10  -2   82.59   12.30
 -10 -10   2   51.39    8.20
  10  10  -2   81.09   12.00
  -9 -10   2  406.66   18.50
  -9 -10   2  377.46   18.00
   9  10  -2  348.37   20.20
  -8 -10   2   34.80    6.60
  -8 -10   2   34.70    6.80
   8 -10  -2   31.00    6.20
   8  10  -2   30.50    7.60
  -7 -10   2    3.20    3.70
   7 -10  -2    2.10    3.10
  -7 -10   2   -1.30    3.30
   7  10  -2    9.00    5.00
   6 -10  -2   15.80    4.60
  -6 -10   2   39.20    7.00
  -6 -10   2    9.20    4.60
   6  10  -2   12.30    5.00
  -5 -10   2  781.12   27.00
  -5 -10   2  794.12   27.70
   5  10  -2  759.72   28.20
  -4 -10   2   89.79    8.70
   4 -10  -2  107.29    9.80
  -4 -10   2   83.69    8.50
   4  10  -2   93.09    9.50
  -3 -10   2  154.28   10.50
   3 -10  -2  176.28   10.30
  -3 -10   2  173.48   11.60
   3  10  -2  166.78   11.70
  -2 -10   2  748.23   26.10
  -2 -10   2  761.02   25.80
   2 -10  -2  730.93   24.30
  -1 -10   2  208.98   11.90
   1 -10  -2  227.48   12.20
  -1 -10   2  216.08   12.30
   0 -10  -2   33.80    5.60
   0 -10   2   31.30    5.80
   0 -10  -2   45.40    7.10
   0  10   2   37.00    6.40
  -1 -10  -2  778.82   25.60
   1 -10   2  761.12   25.00
   1 -10   2  735.63   25.30
  -1 -10  -2  780.42   26.80
   1  10   2  730.23   25.90
  -2 -10  -2  588.64   22.60
  -2 -10  -2  569.04   21.50
   2 -10   2  571.64   21.00
   2  10   2  576.44   22.50
   3 -10   2  404.76   16.70
  -3 -10  -2  391.76   18.10
   3 -10   2  367.76   15.70
  -3 -10  -2  414.46   17.70
   3  10   2  410.96   18.50
  -4 -10  -2   74.69    8.00
   4 -10   2   79.49    7.20
   4 -10   2   84.39    7.10
  -4 -10  -2   71.79    9.00
   4  10   2   83.39    8.80
   5 -10   2  705.23   22.20
  -5 -10  -2  682.43   25.20
  -5 -10  -2  637.14   23.90
   5  10   2  660.03   25.80
  -6 -10  -2  412.66   18.50
  -6 -10  -2  472.15   20.10
   6 -10   2  448.66   16.50
   6  10   2  434.36   20.60
   7 -10   2   15.90    4.00
   7 -10   2   -3.20    4.20
  -7 -10  -2   12.70    5.10
  -7 -10  -2   14.40    5.00
  -8 -10  -2   26.00    6.10
   8 -10   2   13.10    4.00
   8 -10   2    3.80    5.80
  -8 -10  -2   19.30    5.10
   8  10   2   25.20    7.20
   9 -10   2  555.44   28.00
   9 -10   2  546.65   18.00
  -9 -10  -2  524.65   21.10
  -9 -10  -2  562.04   22.00
  -9 -10  -2  543.45   22.30
   9  10   2  524.15   24.90
 -10 -10  -2   99.09    9.20
  10 -10   2   85.29   13.30
 -10 -10  -2  104.39   10.10
  10 -10   2   88.99    6.80
 -10 -10  -2  105.29    9.50
  10  10   2   98.09   12.40
  11 -10   2   12.90    7.20
 -11 -10  -2   11.40    4.90
  11 -10   2   17.80    3.90
 -11 -10  -2   19.60    5.10
 -11 -10  -2   23.30    5.90
  11  10   2   26.20    7.60
  12 -10   2   12.60    3.60
 -12 -10  -2    7.60    4.00
 -12 -10  -2    7.30    5.00
  12 -10   2    7.70    6.90
  12  10   2   -0.70    5.00
 -13 -10  -2   86.79   10.60
  13 -10   2  113.89    7.30
 -13 -10  -2   98.69    7.60
 -14 -10  -2    5.20    1.80
 -14 -10  -2    2.70    5.30
  14 -10   2    4.60    3.20
 -14 -11   2   15.80    5.10
 -14 -11   2    3.90    3.70
 -14 -11   2    7.30    4.90
  14 -11  -2   17.60    4.80
  14  11  -2   11.90    7.10
  13 -11  -2   30.00    5.60
 -13 -11   2   30.20    6.30
  13 -11  -2   31.40    9.50
 -13 -11   2   30.10    6.50
  13  11  -2   35.10    9.80
 -12 -11   2    2.20    4.40
 -12 -11   2    3.10    4.40
  12 -11  -2   -3.90    5.70
  12 -11  -2    3.00    3.50
 -11 -11   2  577.54   24.10
  11 -11  -2  605.84   21.30
 -11 -11   2  598.94   24.60
 -11 -11   2  645.44   24.00
  11  11  -2  631.04   29.80
 -10 -11   2   17.70    5.80
 -10 -11   2   13.50    4.40
  10 -11  -2    5.00    5.80
  10 -11  -2   12.60    4.20
 -10 -11   2   17.10    6.00
  10  11  -2   12.80    6.50
  -9 -11   2   23.50    6.50
  -9 -11   2   32.10    6.70
   9 -11  -2   23.40    5.20
   9  11  -2   39.80    8.70
   8 -11  -2   11.10    3.80
  -8 -11   2   13.40    5.70
  -8 -11   2   10.00    5.00
   8  11  -2   12.70    5.90
   7 -11  -2  197.58   11.50
  -7 -11   2  194.78   13.40
  -7 -11   2  241.48   14.70
   7  11  -2  238.28   16.20
  -6 -11   2   67.99    9.30
   6 -11  -2   67.99    7.10
  -6 -11   2   73.49    9.80
   6  11  -2   65.09    9.80
  -5 -11   2   37.00    7.20
   5 -11  -2   42.60    6.60
  -5 -11   2   37.20    7.00
   5  11  -2   43.90    7.60
  -4 -11   2  104.49    9.90
   4 -11  -2   99.79    8.50
  -4 -11   2  106.79    9.90
   4  11  -2  105.59   10.50
  -3 -11   2  522.65   21.90
  -3 -11   2  520.25   21.50
   3 -11  -2  539.15   20.30
  -2 -11   2    3.60    3.90
  -2 -11   2    1.10    3.30
   2 -11  -2    3.10    3.50
  -1 -11   2  107.89    9.80
   1 -11  -2  128.39    9.90
   1 -11  -2  110.09    9.20
  -1 -11   2  130.19   10.20
   0 -11  -2  236.28   14.20
   0 -11   2  237.68   13.90
   0 -11  -2  272.17   14.10
   0 -11   2  252.17   13.70
   1 -11   2  275.17   14.70
  -1 -11  -2  290.17   15.70
  -1 -11  -2  303.37   14.80
   1 -11   2  272.87   14.20
   2 -11   2   90.69    8.90
  -2 -11  -2   73.99    9.30
  -2 -11  -2   63.29    8.40
   2 -11   2   60.79    7.60
   2  11   2   65.19    8.70
  -3 -11  -2  193.98   12.30
   3 -11   2  199.78   11.60
  -3 -11  -2  194.88   13.10
   3 -11   2  169.88   11.30
   3  11   2  194.78   13.00
  -4 -11  -2  109.09    9.80
   4 -11   2  134.39    9.70
  -4 -11  -2  101.89   10.30
   4  11   2  122.99   10.70
  -5 -11  -2   26.80    6.30
  -5 -11  -2   14.90    5.20
   5 -11   2   15.50    5.20
  -6 -11  -2   -2.40    3.60
  -6 -11  -2   -2.40    3.80
  -7 -11  -2  552.44   22.60
  -7 -11  -2  526.65   22.80
   7 -11   2  519.35   19.70
   7 -11   2  530.45   27.10
   8 -11   2  125.69    9.00
  -8 -11  -2  137.89   12.10
   8 -11   2  139.19   14.60
  -8 -11  -2  111.89   10.30
  -9 -11  -2   96.89   10.30
   9 -11   2   86.89   13.50
  -9 -11  -2  106.99    9.90
  -9 -11  -2   90.99   10.40
   9 -11   2   92.59    7.70
 -10 -11  -2   16.10    5.20
  10 -11   2   -2.40    5.50
 -10 -11  -2    1.30    4.40
 -10 -11  -2    7.70    4.90
  10 -11   2    1.20    3.00
 -11 -11  -2  216.18   14.50
  11 -11   2  213.68   10.90
 -11 -11  -2  200.38   12.90
  11 -11   2  176.68   17.70
  11  11   2  221.48   17.50
 -12 -11  -2   24.80    6.70
  12 -11   2   10.40    3.70
 -12 -11  -2    7.30    4.20
 -12 -11  -2   10.90    4.90
  13 -11   2   63.39    6.40
 -13 -11  -2   50.69    8.50
 -13 -11  -2   49.99    6.80
 -13 -12   2  118.89    9.60
 -13 -12   2  100.59   11.70
  13 -12  -2  111.99    9.40
 -13 -12   2  135.79   11.80
  13  12  -2  128.49   16.50
 -12 -12   2   -1.80    5.50
 -12 -12   2   -4.10    4.60
  12 -12  -2   -6.70    6.10
  12 -12  -2    4.50    4.10
 -12 -12   2    4.30    3.70
  12  12  -2    7.60    6.00
  11 -12  -2   -2.40    5.50
  11 -12  -2   -1.50    3.30
 -11 -12   2   -6.90    2.70
 -11 -12   2   -6.00    4.00
 -11 -12   2   10.90    5.90
  10 -12  -2    4.90    5.80
 -10 -12   2   -0.10    3.90
 -10 -12   2   -8.80    4.40
 -10 -12   2    3.50    3.40
  10 -12  -2   -0.10    3.20
  10  12  -2   -6.10    3.90
  -9 -12   2  493.95   22.50
  -9 -12   2  433.26   21.40
   9 -12  -2  482.15   19.10
   9  12  -2  472.55   24.90
  -8 -12   2   67.19    9.50
  -8 -12   2   62.49    9.30
   8 -12  -2   67.39    8.00
   8  12  -2   46.20    9.40
   7 -12  -2    8.20    4.40
  -7 -12   2   -2.00    3.80
  -7 -12   2    2.10    4.70
   7  12  -2   -0.70    5.20
  -6 -12   2  139.99   12.70
   6 -12  -2  165.38   11.00
  -6 -12   2  160.78   13.10
   6  12  -2  152.98   13.20
  -5 -12   2 1594.74   46.20
  -5 -12   2 1584.44   46.90
   5 -12  -2 1526.05   42.70
   5  12  -2 1495.15   47.20
   4 -12  -2   16.60    5.20
  -4 -12   2   21.30    5.40
  -4 -12   2   13.80    5.80
   3 -12  -2  237.98   14.00
  -3 -12   2  278.67   15.90
  -3 -12   2  275.97   15.50
  -2 -12   2   33.90    7.00
   2 -12  -2   29.20    6.60
   2 -12  -2   30.50    6.30
  -2 -12   2   35.80    7.20
  -1 -12   2  283.07   15.90
   1 -12  -2  332.77   16.30
   1 -12  -2  322.47   17.20
  -1 -12   2  330.07   16.80
   0 -12   2   57.39    8.30
   0 -12   2   59.29    8.20
   0 -12  -2   66.59    8.70
   0 -12  -2   74.19    9.60
  -1 -12  -2  129.79   10.60
   1 -12   2  144.79   11.20
  -1 -12  -2  121.79   10.90
   1 -12   2  138.59   10.50
  -2 -12  -2   14.40    5.40
   2 -12   2   22.00    5.50
   2 -12   2   21.30    5.50
  -2 -12  -2   25.00    6.20
   3 -12   2   66.39    8.40
  -3 -12  -2   58.29    8.50
   3 -12   2   57.99    8.20
  -3 -12  -2   66.09    9.30
   4 -12   2   59.29    8.20
  -4 -12  -2   89.89    9.40
   4 -12   2   75.49    7.90
  -4 -12  -2   58.59    8.50
  -5 -12  -2  257.67   16.00
   5 -12   2  257.27   14.60
  -5 -12  -2  264.27   15.40
   5 -12   2  265.87   14.10
   6 -12   2   43.70    7.10
  -6 -12  -2   34.80    7.80
  -6 -12  -2   43.30    7.80
   7 -12   2  276.67   14.00
   7 -12   2  281.57   20.30
  -7 -12  -2  285.57   17.50
  -7 -12  -2  276.67   16.20
  -8 -12  -2    4.30    4.30
   8 -12   2   -3.70    5.20
  -8 -12  -2    6.00    5.50
   8 -12   2   -1.60    2.80
   9 -12   2  358.36   15.60
   9 -12   2  344.57   24.00
  -9 -12  -2  388.56   18.90
  -9 -12  -2  380.76   19.80
  10 -12   2   68.79    7.40
 -10 -12  -2   59.19    8.90
  10 -12   2   50.69   11.80
 -10 -12  -2   65.89    9.50
 -10 -12  -2   65.99    9.70
 -11 -12  -2    5.30    5.10
 -11 -12  -2   15.40    5.80
 -11 -12  -2   23.10    6.20
  11 -12   2   16.50    4.40
 -12 -12  -2   10.80    5.30
  12 -12   2   11.20    4.40
 -12 -12  -2   23.50    6.70
 -12 -12  -2   16.40    5.50
 -13 -12  -2  181.58   12.20
 -13 -12  -2  191.78   14.70
  13 -12   2  178.78   10.60
 -13 -13   2    6.10    5.80
 -13 -13   2   -0.30    3.50
 -13 -13   2    1.30    5.10
  13 -13  -2    5.00    4.30
  13  13  -2   -2.90    6.40
 -12 -13   2   -7.10    3.20
 -12 -13   2    4.00    5.20
  12 -13  -2   -1.70    3.70
  12  13  -2    4.10    6.40
 -11 -13   2  233.38   15.90
  11 -13  -2  240.88   13.70
 -11 -13   2  246.28   14.30
  11  13  -2  222.08   19.00
 -10 -13   2   -1.10    5.10
  10 -13  -2    3.90    3.90
 -10 -13   2   14.10    6.40
  10  13  -2    7.40    7.70
  -9 -13   2    8.50    6.50
  -9 -13   2   14.90    5.90
   9 -13  -2   10.10    4.60
   9  13  -2   14.30    7.00
   8 -13  -2   60.59    8.30
  -8 -13   2   62.59   10.00
  -8 -13   2   62.09   10.00
   8  13  -2   38.90    9.10
   7 -13  -2  723.13   25.60
  -7 -13   2  679.23   28.20
  -7 -13   2  710.33   29.10
   7  13  -2  723.53   31.30
   6 -13  -2   36.90    7.20
  -6 -13   2   36.60    8.50
  -6 -13   2   49.40    8.50
   6  13  -2   39.50    8.90
  -5 -13   2   19.70    6.20
   5 -13  -2   23.60    5.90
  -5 -13   2   15.50    6.40
  -4 -13   2   38.60    7.90
   4 -13  -2   23.90    5.90
  -4 -13   2   28.30    7.30
   3 -13  -2  252.87   14.60
  -3 -13   2  259.07   15.40
  -3 -13   2  290.17   16.90
   2 -13  -2    8.70    4.60
   2 -13  -2    0.80    4.20
  -2 -13   2    9.60    4.20
  -2 -13   2    5.40    3.80
  -1 -13   2   15.30    5.60
  -1 -13   2   23.40    6.10
   1 -13  -2   10.10    5.10
   1 -13  -2    8.00    4.70
   0 -13  -2   10.10    4.00
   0 -13   2   10.10    5.50
   0 -13  -2    8.40    5.40
   0 -13   2   22.80    6.00
   1 -13   2  184.68   13.40
  -1 -13  -2  186.58   13.10
   1 -13   2  178.08   12.60
  -1 -13  -2  206.18   14.50
   2 -13   2    4.00    4.50
   2 -13   2    4.50    4.20
  -2 -13  -2    9.80    5.60
  -2 -13  -2    5.60    4.20
   3 -13   2  251.87   15.30
   3 -13   2  295.77   15.50
  -3 -13  -2  278.37   16.20
  -3 -13  -2  262.07   16.70
  -4 -13  -2   33.50    7.20
  -4 -13  -2   40.00    8.30
   4 -13   2   47.60    7.60
   4 -13   2   20.80    6.30
   5 -13   2  290.67   16.30
  -5 -13  -2  332.27   18.70
   5 -13   2  337.87   16.70
  -5 -13  -2  310.37   17.50
   6 -13   2   12.50    5.50
  -6 -13  -2    4.80    4.80
   6 -13   2   12.90    5.00
  -6 -13  -2    4.90    5.80
  -7 -13  -2  444.06   22.20
   7 -13   2  398.36   17.80
   7 -13   2  421.46   19.20
   7 -13   2  382.06   30.00
  -7 -13  -2  412.46   21.00
   8 -13   2   11.40    4.60
   8 -13   2   13.10    6.90
  -8 -13  -2   14.40    5.90
  -8 -13  -2    8.20    6.00
  -9 -13  -2    1.80    5.60
  -9 -13  -2   -0.90    4.90
   9 -13   2    6.40    4.20
   9 -13   2   12.10    7.60
  10 -13   2    6.00    4.00
 -10 -13  -2   -1.10    4.40
 -10 -13  -2    1.00    4.80
 -10 -13  -2   -3.60    5.00
 -11 -13  -2  302.77   17.40
  11 -13   2  295.07   14.70
 -11 -13  -2  308.97   18.30
  12 -13   2    8.50    4.20
 -12 -13  -2   -1.40    4.80
 -12 -13  -2   10.80    6.30
 -12 -13  -2   14.90    6.00
  12 -14  -2    6.50    4.80
 -12 -14   2   -2.00    4.10
 -12 -14   2   -1.50    6.20
  12  14  -2   11.10    7.30
  11 -14  -2    3.40    4.40
 -11 -14   2    7.40    6.10
 -11 -14   2   19.30    5.60
  11  14  -2    1.80    6.50
 -10 -14   2    5.90    5.60
  10 -14  -2   28.00    6.30
  10  14  -2   18.80    8.00
  -9 -14   2  334.87   19.90
   9 -14  -2  323.77   16.50
   9  14  -2  326.87   22.00
  -8 -14   2    8.50    6.00
  -8 -14   2    1.40    6.80
   8 -14  -2    6.60    4.10
   7 -14  -2   11.20    5.00
  -7 -14   2    4.90    5.30
  -7 -14   2   15.90    6.80
  -6 -14   2   24.00    8.70
   6 -14  -2   18.90    5.60
  -6 -14   2   11.70    6.00
   5 -14  -2  567.44   23.50
  -5 -14   2  541.15   25.70
  -5 -14   2  518.65   24.60
   4 -14  -2    3.50    4.30
  -4 -14   2   -7.80    4.30
  -4 -14   2   -2.50    2.70
   3 -14  -2  262.97   15.50
   3 -14  -2  237.28   15.90
  -3 -14   2  212.48   18.50
  -3 -14   2  230.58   15.80
   2 -14  -2    3.90    5.10
  -2 -14   2   14.40    6.10
  -2 -14   2   -5.80    3.80
   2 -14  -2    4.90    4.30
  -1 -14   2  186.28   14.20
  -1 -14   2  182.58   13.20
   1 -14  -2  213.78   14.10
   1 -14  -2  204.08   14.90
   0 -14  -2    4.20    4.40
   0 -14  -2   17.40    6.00
   0 -14   2    5.10    4.90
   0 -14   2    4.50    4.40
   1 -14   2  177.58   14.00
  -1 -14  -2  159.08   13.00
   1 -14   2  191.18   13.50
  -1 -14  -2  163.48   13.00
  -2 -14  -2  115.79   11.40
  -2 -14  -2   97.79   12.70
   2 -14   2   98.19   10.70
   2 -14   2  114.89   10.90
   3 -14   2  326.57   17.90
  -3 -14  -2  366.66   19.20
   3 -14   2  325.87   18.10
  -3 -14  -2  344.87   19.80
  -4 -14  -2   24.00    6.50
   4 -14   2   30.40    6.90
  -4 -14  -2   29.00    6.80
   4 -14   2   33.10    7.10
  -5 -14  -2  512.55   23.70
   5 -14   2  493.35   22.80
   5 -14   2  529.85   22.30
  -5 -14  -2  518.55   25.20
   6 -14   2    6.70    5.20
  -6 -14  -2   21.50    7.40
   6 -14   2   16.30    6.10
  -6 -14  -2    7.20    5.60
   7 -14   2  102.49    9.80
   7 -14   2  114.39   11.20
  -7 -14  -2  121.59   12.10
   8 -14   2    9.20    6.70
  -8 -14  -2    6.80    5.80
   8 -14   2    9.30    5.00
  -8 -14  -2   15.70    6.60
   8 -14   2   16.40    6.10
  -9 -14  -2  295.27   18.60
   9 -14   2  298.67   16.90
   9 -14   2  302.37   15.90
  -9 -14  -2  292.07   18.40
  10 -14   2    2.40    4.10
 -10 -14  -2   -1.40    4.70
 -10 -14  -2    4.80    6.00
 -10 -14  -2   -4.40    4.40
  10 -14   2    6.70    4.90
  11 -14   2    4.30    4.00
 -11 -14  -2   10.70    6.00
 -11 -14  -2    5.90    5.30
 -11 -14  -2   -1.10    4.30
 -11 -15   2  153.78   14.30
 -11 -15   2  159.88   12.90
  11 -15  -2  158.38   12.40
  10 -15  -2    2.30    4.50
 -10 -15   2   10.60    6.10
  -9 -15   2   29.40    8.90
   9 -15  -2   36.50    7.30
  -8 -15   2    1.80    6.10
   8 -15  -2    2.20    4.10
   7 -15  -2  281.07   16.30
  -7 -15   2  302.47   18.90
  -6 -15   2    8.30    5.60
   6 -15  -2    6.90    4.80
  -5 -15   2   28.10    7.60
   5 -15  -2    6.10    4.80
   4 -15  -2   19.50    6.70
  -4 -15   2   11.10    6.00
   4 -15  -2   14.30    5.60
   3 -15  -2  236.48   16.70
  -3 -15   2  251.47   16.70
   3 -15  -2  249.48   15.90
   2 -15  -2   -1.50    3.80
  -2 -15   2    6.60    5.10
   2 -15  -2   -7.10    3.70
  -1 -15   2   70.99   10.60
   1 -15  -2   86.09   11.70
   1 -15  -2   90.89   11.50
  -1 -15   2   93.69   11.60
   0 -15   2   12.20    6.40
   0 -15  -2    6.70    5.00
   0 -15  -2   10.90    5.40
   0 -15   2    8.20    5.80
   1 -15   2   79.19   10.90
   1 -15   2   95.09   12.10
  -1 -15  -2  105.49   11.30
   2 -15   2   11.40    5.80
   2 -15   2    5.90    4.80
  -2 -15  -2   22.70    6.80
  -3 -15  -2  226.38   15.90
   3 -15   2  246.08   16.10
   3 -15   2  218.98   15.60
  -4 -15  -2    0.20    5.80
  -4 -15  -2   -7.00    3.80
   4 -15   2    7.80    4.80
   4 -15   2    3.60    5.60
   5 -15   2  130.99   12.40
  -5 -15  -2  117.69   12.40
   5 -15   2  114.49   11.60
   6 -15   2   63.59    9.80
  -6 -15  -2   49.99    9.30
   6 -15   2   69.69    9.60
   7 -15   2  161.78   13.70
  -7 -15  -2  194.88   15.30
   7 -15   2  197.98   13.70
  -8 -15  -2    0.70    5.30
   8 -15   2    4.20    4.10
   8 -15   2  -13.40    3.90
   9 -15   2    9.30    5.00
   9 -15   2   -6.40    4.80
  -9 -15  -2    9.20    7.20
  10 -15   2   14.00    5.40
 -10 -15  -2    3.90    5.00
 -10 -15  -2   17.90    7.00
  10 -15   2    3.40    5.50
  11 -15   2  160.88   14.00
  11 -15   2  161.58   12.10
 -11 -15  -2  150.38   14.80
 -11 -15  -2  166.78   17.80
 -11 -15  -2  194.28   15.90
 -10 -16   2    2.00    5.50
  10 -16  -2    8.10    5.20
  -9 -16   2  102.39   13.20
   9 -16  -2  120.79   11.80
   8 -16  -2   13.20    5.40
  -8 -16   2   10.20    6.50
   7 -16  -2   74.19   10.20
  -7 -16   2   68.39   11.20
   6 -16  -2    3.20    6.30
  -6 -16   2   -0.60    6.10
   6 -16  -2   11.50    5.30
   5 -16  -2  216.78   15.10
  -5 -16   2  233.08   17.50
   5 -16  -2  251.87   17.90
  -4 -16   2    2.20    3.60
   4 -16  -2    3.10    4.70
   4 -16  -2    4.80    4.50
  -3 -16   2   10.80    5.30
   3 -16  -2    4.00    4.90
   3 -16  -2   -4.90    3.70
   2 -16  -2   57.19   10.60
  -2 -16   2   79.89   11.30
   2 -16  -2   45.70    8.80
   1 -16  -2  348.57   21.60
  -1 -16   2  373.56   21.80
  -1 -16   2  450.05   22.70
   1 -16  -2  415.66   21.70
   0 -16   2   30.40    7.90
   0 -16   2   49.90    9.70
   0 -16  -2   25.70    7.50
   1 -16   2  140.49   14.00
   1 -16   2  137.59   13.00
  -1 -16  -2  112.69   12.30
  -2 -16  -2  162.98   14.10
   2 -16   2  143.49   13.10
   3 -16   2  184.48   14.40
  -3 -16  -2  166.78   14.40
  -4 -16  -2    5.80    4.90
   4 -16   2    4.80    6.00
   4 -16   2    4.70    4.70
  -4 -16  -2   -0.70    6.00
   5 -16   2   86.99   11.20
  -5 -16  -2   67.49   11.20
   5 -16   2   85.59   11.50
  -6 -16  -2  103.29   13.70
   6 -16   2   82.39   11.60
   6 -16   2   78.79   10.40
   7 -16   2   22.10    6.20
  -7 -16  -2    5.20    6.10
   7 -16   2    5.70    5.30
   8 -16   2    0.90    5.50
   8 -16   2    4.10    4.80
  -8 -16  -2    4.20    5.10
  -9 -16  -2   87.49   12.10
   9 -16   2  119.89   11.30
  10 -16   2   18.20    5.50
 -10 -16  -2   12.30    6.60
  -9 -17   2   -7.10    5.30
   9 -17  -2    0.40    4.70
   8 -17  -2   13.60    6.80
   8 -17  -2    0.90    5.00
  -8 -17   2    8.70    6.90
  -7 -17   2  122.29   15.00
   7 -17  -2  135.89   15.60
   7 -17  -2  133.89   13.20
   6 -17  -2   -0.50    4.50
   6 -17  -2   15.10    6.20
  -6 -17   2   -1.10    5.40
   5 -17  -2   80.19   12.50
   5 -17  -2   75.49   10.80
  -5 -17   2   92.79   12.90
   4 -17  -2    8.20    7.10
   4 -17  -2   21.90    7.20
  -4 -17   2   24.00    8.00
  -3 -17   2  178.88   16.00
   3 -17  -2  185.78   14.70
   3 -17  -2  210.18   17.30
   2 -17  -2   16.60    6.50
   2 -17  -2   22.00    8.10
   1 -17  -2  125.69   12.90
  -1 -17   2  128.09   13.50
  -1 -17   2  131.99   17.20
   1 -17  -2  112.69   14.60
   0 -17  -2   50.59   11.10
   0 -17   2   30.20    8.50
   0 -17   2   55.49    9.80
   0 -17  -2   18.60    6.50
   1 -17   2  130.19   15.40
   1 -17   2  139.69   13.50
  -2 -17  -2    4.00    6.00
   2 -17   2    1.50    5.40
   2 -17   2  -10.00    4.30
   3 -17   2  290.87   18.60
  -3 -17  -2  309.37   19.70
   3 -17   2  286.27   19.40
   4 -17   2   67.59   10.90
  -4 -17  -2   70.09   11.20
   4 -17   2   39.10    8.40
   5 -17   2   54.49    9.50
  -5 -17  -2   35.20    9.20
   5 -17   2   59.49   10.60
  -6 -17  -2   -2.60    4.80
   6 -17   2    2.90    4.30
   6 -17   2   -2.80    6.10
   7 -17   2  120.39   11.80
   7 -17   2  101.59   13.20
  -7 -17  -2  115.59   14.20
   8 -17   2   23.60    8.40
  -8 -17  -2   17.10    7.10
   8 -17   2    4.70    5.80
   9 -17   2   31.90    7.40
   9 -17   2   21.70    7.30
  -9 -17  -2   26.30    9.30
   8 -18  -2    8.60    5.60
  -8 -18   2    0.90    5.70
  -7 -18   2   -8.60    5.00
   7 -18  -2    1.70    5.50
  -6 -18   2   26.70    8.80
   6 -18  -2   45.20    9.10
  -5 -18   2   93.89   13.70
   5 -18  -2   86.99   12.10
  -4 -18   2   -2.20    4.70
   4 -18  -2    3.20    5.30
   3 -18  -2   17.30    7.40
  -3 -18   2   39.40    8.80
  -2 -18   2   42.60    9.90
   2 -18  -2   49.99    9.80
  -1 -18   2  115.29   12.30
   1 -18  -2  133.79   13.30
   0 -18  -2   23.50    7.80
   0 -18   2   38.10    9.10
  -1 -18  -2  171.68   15.30
   1 -18   2  137.09   14.40
  -2 -18  -2  110.59   14.10
   2 -18   2   90.69   14.90
  -3 -18  -2  144.89   14.80
  -4 -18  -2   -1.70    5.50
  -5 -18  -2  110.29   14.40
  -6 -18  -2   70.09   12.10
  -7 -18  -2   49.30    9.90
   7 -19  -2  167.68   15.70
  -7 -19   2  158.58   16.10
   6 -19  -2    8.90    6.20
  -6 -19   2    6.80    5.60
   5 -19  -2   53.59   10.30
  -5 -19   2   45.30   10.10
   4 -19  -2   40.50    9.50
  -4 -19   2   41.90   10.10
   3 -19  -2   37.60    8.80
  -3 -19   2   45.10    9.70
  -2 -19   2    7.90    6.10
   2 -19  -2   12.50    6.80
   1 -19  -2   63.29   11.10
  -1 -19   2   70.79   11.80
   0 -19  -2   18.00    7.20
   0 -19   2   45.80    9.80
  -1 -19  -2   74.89   12.40
   1 -19   2   93.19   13.40
  -2 -19  -2   -3.50    5.20
   2 -19   2    7.80    5.80
  -3 -19  -2  162.38   15.70
   3 -19   2  121.39   13.30
  -4 -19  -2   41.60    9.90
   4 -19   2   44.70    9.50
   5 -19   2  126.89   15.00
  -5 -19  -2   97.89   13.90
  -6 -19  -2    8.80    6.80
   6 -19   2   -3.70    5.30
   4 -20  -2   -8.30    5.80
  -4 -20   2    4.60    6.70
  -3 -20   2   43.80   10.50
   3 -20  -2   28.80    8.60
  -2 -20   2   39.60   10.00
   2 -20  -2   46.10   10.60
   1 -20  -2  113.09   14.90
  -1 -20   2  110.49   15.10
   0 -20  -2    2.50    6.00
   0 -20   2   10.10    6.10
   1 -20   2   38.70    9.30
  -1 -20  -2   21.90    8.30
   2 -20   2   85.39   13.10
  -2 -20  -2   63.59   11.90
   3 -20   2   47.60   10.90
  -3 -20  -2   75.69   12.40
   4 -20   2   -8.30    6.00
  -4 -20  -2   -1.30    5.90
  17   0  -3  220.28   15.00
  16   0  -3   -1.80    3.80
  15   0  -3    5.10    4.30
  14   0  -3   -3.70    3.20
  14   0  -3   -2.50    2.60
  13   0  -3  722.53   27.10
  13   0  -3  599.34   21.60
  12   0  -3    1.80    2.90
  12   0  -3   -0.90    3.20
  11   0  -3    7.80    3.00
  11   0  -3    5.40    3.00
  10   0  -3   -2.50    1.90
  10   0  -3    0.30    2.10
   9   0  -3   56.29    5.10
   9   0  -3   46.90    5.00
   8   0  -3   -2.40    1.30
  -7   0   3 3669.43   73.49
  -7   0   3 3535.75   73.59
   7   0  -3 3589.04   77.19
   7   0  -3 3529.35   76.69
   6   0  -3    0.60    1.50
   6   0  -3   -0.40    1.10
  -6   0   3    0.40    1.10
  -6   0   3    1.60    1.30
   5   0  -3  532.65   15.00
  -5   0   3  550.54   13.90
   5   0  -3  537.15   14.00
  -4   0   3    0.90    1.10
   4   0  -3    0.10    1.20
   3   0  -3 5352.06  144.79
  -2   0   3   -0.60    1.00
   2   0  -3    0.30    1.20
   1   0  -3 1734.23   58.79
  -1   0   3 1700.43   58.89
   0   0   3   -0.10    0.80
   0   0  -3   -0.30    0.80
   0   0   3    0.10    0.70
   0   0  -3    0.50    0.70
  -1   0  -3 2165.38   63.69
   1   0   3 2195.88   63.89
  -2   0  -3    0.30    1.90
   2   0   3   -0.80    0.80
   2   0   3   -1.80    1.60
   3   0   3  703.63   15.30
  -3   0  -3  711.23   20.00
   3   0   3  663.53   15.30
   3   0   3  707.53   20.00
   4   0   3    1.80    0.80
  -4   0  -3    1.00    1.90
   4   0   3   -0.90    1.40
   4   0   3   -0.20    0.60
  -5   0  -3 1458.25   37.70
   5   0   3 1467.65   30.90
   5   0   3 1463.35   31.20
   5   0   3 1469.85   37.90
  -6   0  -3   -0.60    2.10
   6   0   3    0.20    1.00
   6   0   3    0.80    1.10
   7   0   3  168.18    6.20
  -7   0  -3  170.78   10.30
   7   0   3  158.88   10.10
   7   0   3  166.08    5.90
   8   0   3   -1.90    1.20
   8   0   3   -2.70    2.40
   8   0   3   -0.10    1.40
  -8   0  -3    1.70    3.30
   9   0   3  125.99    9.90
  -9   0  -3  113.69    9.60
   9   0   3   94.49    5.60
   9   0   3  108.29    5.60
 -10   0  -3    3.10    3.60
  10   0   3    2.10    2.10
  10   0   3   -1.90    3.50
  10   0   3   -0.90    1.80
 -11   0  -3  141.89   11.70
  11   0   3  119.29   10.90
  11   0   3  111.39    7.30
  12   0   3    0.40    3.50
  12   0   3   -1.90    2.60
  13   0   3  185.88   10.40
  13   0   3  211.98   14.90
  14   0   3   -1.80    4.20
  14   0   3   -0.40    3.10
  16   0   3    7.10    4.10
  17  -1  -3   42.00    7.40
  17   1  -3   44.70    8.70
  16  -1  -3    7.50    5.10
  16  -1  -3    7.80    4.90
  16   1  -3   -0.10    4.60
  15  -1  -3  144.19   10.90
  15  -1  -3  140.29   10.40
  15   1  -3  142.89   11.70
  14  -1  -3   40.10    6.40
  14  -1  -3   40.50    6.30
  14   1  -3   35.80    6.80
  13  -1  -3  113.89    9.30
  13  -1  -3  126.09    9.20
  13   1  -3  151.18   10.60
  12  -1  -3   46.40    6.60
  12  -1  -3   36.40    5.70
  12   1  -3   36.60    5.20
  11  -1  -3  151.78    8.70
  11  -1  -3  108.39    8.40
  11   1  -3  115.19    8.80
  11   1  -3  135.49    7.90
  10  -1  -3   13.80    3.40
  10  -1  -3   13.90    3.70
  10   1  -3   18.50    4.40
  10   1  -3   17.50    3.50
   9  -1  -3 1658.23   39.00
   9  -1  -3 1628.94   40.90
   9   1  -3 1570.34   38.20
   9   1  -3 1587.74   40.30
  -8  -1   3   35.30    2.80
   8  -1  -3   36.70    4.70
   8  -1  -3   32.60    3.90
  -8  -1   3   29.00    2.60
   8   1  -3   36.90    4.80
   8   1  -3   31.00    3.50
   7  -1  -3  105.49    5.80
   7  -1  -3  104.59    6.50
  -7  -1   3  111.19    5.30
  -7  -1   3  103.39    5.00
   7   1  -3   99.99    6.40
   7   1  -3  105.09    5.20
  -6  -1   3   17.30    2.40
   6  -1  -3   17.80    2.80
  -6  -1   3   17.40    2.60
   6  -1  -3   12.60    2.30
   6   1  -3   16.30    3.00
  -6   1   3   14.60    1.60
   6   1  -3   17.10    2.10
  -5  -1   3 5169.88  154.48
  -5  -1   3 5079.59  151.48
   5  -1  -3 5380.16  148.89
  -5   1   3 4953.50  145.09
  -4  -1   3  278.87    8.90
   4  -1  -3  277.57    8.70
   4   1  -3  273.97    6.40
  -4   1   3  284.37    8.30
   4   1  -3  273.67    9.50
   3  -1  -3   27.90    2.60
  -3  -1   3   26.90    2.90
  -3   1   3   27.10    2.60
   3   1  -3   20.30    2.70
  -2  -1   3  224.78    5.50
   2  -1  -3  230.08    7.20
  -2  -1   3  219.58    7.20
   2   1  -3  211.18    5.60
  -2   1   3  236.58    7.20
   2   1  -3  216.08    7.50
   1  -1  -3 4023.00  109.79
  -1  -1   3 3897.31  110.09
  -1   1   3 4253.07  111.99
   1   1  -3 4055.19  111.19
   0  -1   3  298.27    9.00
   0  -1   3  281.67    7.90
   0  -1  -3  290.87    8.20
   0   1   3  292.77    8.20
   0   1  -3  279.97    8.90
  -1  -1  -3  797.32   20.20
  -1  -1  -3  788.52   18.40
   1  -1   3  832.42   20.80
   1  -1   3  802.22   17.70
  -1   1  -3  824.32   17.30
  -1   1  -3  792.42   20.60
   1   1   3  793.52   18.50
  -2  -1  -3 6596.54  156.48
   2  -1   3 5812.62  147.99
  -2   1  -3 6434.56  140.29
   2   1   3 5901.61  158.28
  -3  -1  -3 8806.42  205.88
   3  -1   3 8735.23  183.48
   3   1   3 8516.55  204.88
  -3   1  -3 8258.97  182.68
   4  -1   3  872.41   25.10
  -4  -1  -3  856.81   24.10
   4   1   3  872.71   24.20
   4   1   3  869.21   20.20
   4   1   3  871.71   20.70
  -4   1  -3  911.51   25.40
   5  -1   3   12.50    3.50
  -5  -1  -3   15.00    3.50
   5   1   3    9.80    3.10
   5   1   3   13.40    2.20
   5   1   3   15.00    2.10
  -5   1  -3   12.70    3.40
   6  -1   3   89.09    7.70
  -6  -1  -3   91.79    7.20
   6   1   3   82.69    7.40
   6   1   3   86.69    4.60
  -6   1  -3   85.59    7.40
   6   1   3   85.49    4.80
   7  -1   3 1237.48   26.40
   7  -1   3 1244.78   26.60
   7  -1   3 1247.88   36.30
  -7  -1  -3 1337.47   35.70
   7   1   3 1238.88   35.00
   7   1   3 1232.58   30.00
   7   1   3 1278.47   29.60
  -7   1  -3 1288.97   36.20
   8  -1   3   -1.00    1.00
   8  -1   3   -1.30    2.50
  -8  -1  -3    1.70    3.10
   8  -1   3    0.10    1.00
   8   1   3   -0.90    1.50
   8   1   3    2.40    2.90
   8   1   3   -0.50    1.70
  -8   1  -3   -5.00    4.90
   9  -1   3   34.40    2.90
   9  -1   3   32.50    6.30
  -9  -1  -3   21.00    5.30
   9  -1   3   32.20    3.00
  -9   1  -3   20.10    5.40
   9   1   3   26.20    3.60
   9   1   3   28.80    4.00
   9   1   3   42.30    6.60
  10  -1   3   89.39    5.00
  10  -1   3   92.59   12.80
  10  -1   3   85.39    5.10
 -10  -1  -3   93.49    9.20
 -10   1  -3   88.99    9.60
  10   1   3   90.99    6.50
  10   1   3   85.99    8.90
  10   1   3   92.59    7.30
 -11  -1  -3  906.61   31.20
  11  -1   3  919.21   32.20
  11  -1   3  841.82   23.00
  11   1   3  916.21   31.10
  11   1   3  869.71   25.70
  11   1   3  869.61   25.10
 -12  -1  -3    8.90    5.00
  12  -1   3    6.90    2.80
  12  -1   3    4.50    4.30
  12   1   3   15.30    5.30
  12   1   3    9.10    3.70
  13  -1   3  126.49   12.00
  13  -1   3  112.99    7.80
  13   1   3  113.39    9.10
  14  -1   3   11.40    4.10
  14  -1   3   11.70    6.10
  14   1   3   23.30    6.40
  15  -1   3  234.88   12.40
  15  -1   3  230.08   16.50
  15   1   3  235.98   13.50
  16  -1   3    0.30    5.30
  16   1   3    5.10    4.30
  17  -2  -3  148.09   11.80
  17  -2  -3  153.78   12.00
  17   2  -3  153.78   13.90
  16  -2  -3   -0.60    3.90
  16  -2  -3    2.80    4.30
  16   2  -3    6.20    5.10
  15  -2  -3  138.29   10.30
  15  -2  -3  126.09   10.40
  15   2  -3  116.19   11.10
  14  -2  -3    9.30    4.80
  14   2  -3    3.20    4.30
  13  -2  -3  103.69    8.00
  13  -2  -3   75.09    8.40
  13   2  -3   91.49    8.90
  12  -2  -3  102.79    7.70
  12  -2  -3  111.49    9.20
  12   2  -3  113.69    9.70
  11  -2  -3    0.50    2.80
  11  -2  -3    5.80    2.90
  11   2  -3    1.30    3.40
  10  -2  -3    4.70    2.90
 -10  -2   3    2.20    1.00
  10  -2  -3   -0.90    1.80
  10   2  -3    0.50    2.80
  -9  -2   3   79.49    4.30
   9  -2  -3   80.19    5.40
   9  -2  -3   84.39    7.30
  -9  -2   3   74.59    4.30
   9   2  -3   66.49    6.50
   8  -2  -3  111.79    6.00
  -8  -2   3  116.39    5.60
   8  -2  -3  111.69    7.70
  -8  -2   3  106.49    5.60
   8   2  -3  112.29    7.40
   7  -2  -3 1451.65   36.80
  -7  -2   3 1444.06   34.20
  -7  -2   3 1433.86   33.70
   7  -2  -3 1478.95   33.70
   7   2  -3 1443.96   36.50
  -6  -2   3  346.27    9.30
  -6  -2   3  348.67   11.30
   6  -2  -3  345.47   10.80
  -6  -2   3  361.86   11.90
   6   2  -3  334.87   12.50
  -5  -2   3  142.39    6.40
  -5  -2   3  134.49    4.20
   5  -2  -3  148.09    6.00
  -5   2   3  149.29    5.00
   5   2  -3  137.59    7.00
   4  -2  -3  263.97    8.40
  -4  -2   3  258.87    9.10
  -4   2   3  269.27    7.90
   4   2  -3  246.78    9.50
   3  -2  -3 1228.28   27.70
  -3  -2   3 1209.18   28.50
   3   2  -3 1151.48   28.80
  -3   2   3 1271.87   27.50
   2  -2  -3  736.23   17.90
  -2  -2   3  707.43   18.30
  -2  -2   3  719.33   16.80
   2   2  -3  722.33   18.60
  -2   2   3  765.52   17.90
   1  -2  -3  320.77    9.40
  -1  -2   3  333.77    9.70
  -1  -2   3  333.37    9.40
  -1   2   3  318.97    9.40
   1   2  -3  286.17    9.40
   0  -2  -3  164.48    6.00
   0  -2   3  165.98    5.90
   0  -2   3  162.78    6.70
   0   2   3  162.68    6.10
   0   2  -3  161.28    5.80
   0   2  -3  150.58    6.60
   1  -2   3 3123.59   86.49
  -1  -2  -3 3192.48   98.99
   1   2   3 3117.39   98.29
  -2  -2  -3  100.29    4.60
   2  -2   3  102.79    4.30
  -2  -2  -3   97.19    4.80
   2  -2   3  103.99    6.60
  -2   2  -3  117.49    6.90
   2   2   3  113.89    5.00
  -3  -2  -3  489.85   15.30
   3  -2   3  465.95   16.20
  -3  -2  -3  485.15   13.00
  -3  -2  -3  505.25   12.80
   3   2   3  475.05   13.80
  -3   2  -3  512.85   16.70
   3   2   3  498.35   13.40
  -4  -2  -3  243.28   10.30
  -4  -2  -3  222.58    7.20
   4  -2   3  247.38   11.40
  -4  -2  -3  233.88    7.20
   4   2   3  225.88    8.50
  -4   2  -3  245.78   11.30
   4   2   3  236.78    8.20
  -5  -2  -3 1561.64   39.50
  -5  -2  -3 1558.34   33.30
  -5  -2  -3 1563.04   33.30
  -5   2  -3 1693.93   41.90
   5   2   3 1595.64   36.70
   5   2   3 1504.25   39.10
   5   2   3 1588.64   36.10
  -6  -2  -3  144.09    8.90
   6  -2   3  173.18   10.70
   6   2   3  165.18    7.20
   6   2   3  159.28    7.60
  -6   2  -3  161.88   10.20
   6   2   3  158.98    9.60
   7  -2   3    4.00    3.40
  -7  -2  -3    9.30    3.60
  -7   2  -3    5.80    3.60
   7   2   3    7.60    2.60
   7   2   3    7.30    2.40
   7   2   3    5.70    3.10
   8  -2   3   97.49    9.10
  -8  -2  -3   99.09    8.40
   8   2   3   93.29    6.10
   8   2   3   97.79    6.50
  -8   2  -3   84.99    8.80
   8   2   3   89.89    7.90
   9  -2   3  886.31   19.80
   9  -2   3  873.71   30.70
  -9  -2  -3  882.51   41.10
   9  -2   3  878.11   19.60
   9   2   3  863.01   25.10
   9   2   3  900.21   24.70
   9   2   3  922.91   29.00
  10  -2   3    0.10    1.40
 -10  -2  -3    2.90    3.70
  10  -2   3   -6.00    2.50
  10  -2   3    2.90    1.50
  10   2   3   -0.90    2.40
  10   2   3    2.00    2.60
  11  -2   3   84.29   10.60
 -11  -2  -3   60.09    8.70
  11  -2   3   61.29    4.40
  11   2   3   69.49    6.70
  11   2   3   80.89    7.50
  12  -2   3   33.00    4.00
 -12  -2  -3   33.50    7.00
  12  -2   3   38.90    8.00
  12   2   3   42.70    6.60
  13  -2   3  419.96   14.30
 -13  -2  -3  413.66   20.60
  13  -2   3  442.96   22.70
  13   2   3  408.56   18.00
  14  -2   3    5.10    5.10
  14  -2   3   -0.20    2.50
  14   2   3    2.60    3.90
  15  -2   3  116.69    8.50
  15  -2   3  125.89   13.60
  15   2   3  137.49   11.20
  16  -2   3   -8.10    9.60
  16  -2   3   -2.40    2.80
  16   2   3    2.60    4.40
  16  -3  -3   34.90    6.70
  16  -3  -3   34.70    7.20
  16   3  -3   47.10    8.90
  15  -3  -3  107.19   10.50
  15  -3  -3   97.89    8.40
  15   3  -3   73.09   10.20
  14  -3  -3    0.90    3.40
  14  -3  -3    5.70    4.60
  14   3  -3   13.00    5.80
  13  -3  -3  446.36   16.50
  13   3  -3  442.16   20.20
  12  -3  -3   70.09    8.80
  12  -3  -3   69.49    6.30
  12   3  -3   68.59    8.80
  11  -3  -3  336.37   12.70
 -11  -3   3  325.67    8.50
  11  -3  -3  368.56   16.90
  11   3  -3  312.27   15.30
  10  -3  -3    1.20    2.90
 -10  -3   3    2.00    1.60
  10  -3  -3    2.70    2.10
 -10  -3   3   -2.20    1.40
   9  -3  -3  455.25   18.00
   9  -3  -3  448.36   14.00
  -9  -3   3  442.36   13.90
  -9  -3   3  453.95   13.70
  -9  -3   3  444.76   13.30
   9   3  -3  414.76   16.90
  -8  -3   3  571.24   15.50
   8  -3  -3  609.44   16.60
  -8  -3   3  577.24   16.90
  -8  -3   3  580.44   17.30
   8   3  -3  582.04   19.80
  -7  -3   3   53.19    3.30
  -7  -3   3   49.00    4.70
   7  -3  -3   35.60    3.50
  -7  -3   3   53.29    4.40
   7   3  -3   42.70    5.60
   6  -3  -3  557.74   15.00
  -6  -3   3  535.25   16.10
  -6  -3   3  549.95   16.90
  -6  -3   3  537.15   13.40
   6   3  -3  511.45   17.50
   5  -3  -3 1367.76   31.30
  -5  -3   3 1348.97   29.20
  -5  -3   3 1371.56   33.00
  -5   3   3 1377.46   29.70
   5   3  -3 1365.96   34.20
  -4  -3   3  219.38    8.80
   4  -3  -3  229.58    7.80
  -4   3   3  218.38    7.20
   4   3  -3  212.68    9.20
  -3  -3   3  321.57   10.80
   3  -3  -3  300.77    9.60
   3   3  -3  308.57   11.00
  -3   3   3  315.67    9.50
  -2  -3   3  134.69    6.40
   2  -3  -3  135.19    5.80
   2   3  -3  132.19    6.60
  -2   3   3  139.09    5.80
   1  -3  -3  901.01   21.50
  -1  -3   3  852.61   21.70
  -1   3   3  869.41   21.40
   1   3  -3  868.61   21.80
   0  -3   3  502.95   15.00
   0  -3   3  500.05   13.70
   0   3   3  490.05   14.00
   0   3  -3  520.15   13.70
  -1  -3  -3  269.57    9.20
   1  -3   3  264.27    8.20
   1  -3   3  265.07   10.70
  -1   3  -3  274.97    7.90
   1   3   3  268.37    9.20
   2  -3   3 3623.54   79.89
   3  -3   3  980.70   28.10
  -3  -3  -3 1019.60   24.90
  -3  -3  -3 1009.60   24.30
   3   3   3 1002.10   25.60
   3   3   3 1012.20   24.90
  -4  -3  -3  333.07   12.50
  -4  -3  -3  315.27   10.50
  -4  -3  -3  333.07   10.30
   4  -3   3  312.47   13.80
   4   3   3  301.67   10.80
   4   3   3  325.17   11.50
  -5  -3  -3    3.50    1.60
  -5  -3  -3   -1.10    1.20
   5  -3   3    1.10    2.50
  -5  -3  -3   -1.10    2.00
   5   3   3    0.90    1.80
   5   3   3    1.80    1.70
   6  -3   3  371.96   16.90
  -6  -3  -3  410.76   11.10
  -6  -3  -3  397.36   15.50
  -6  -3  -3  396.46   11.10
   6   3   3  391.16   14.00
   6   3   3  400.06   13.40
  -7  -3  -3 2239.18   53.79
  -7  -3  -3 2165.78   44.90
   7  -3   3 2183.68   56.89
   7   3   3 2161.28   50.79
   7   3   3 2108.09   50.99
  -8  -3  -3   12.10    4.00
   8  -3   3   16.90    5.00
   8   3   3   12.10    3.40
   8   3   3   14.40    3.30
   9  -3   3   59.19    8.70
   9   3   3   53.39    5.70
   9   3   3   56.69    6.20
  10  -3   3   71.79    3.10
  10  -3   3   59.89    9.30
 -10  -3  -3   71.19    8.90
  10  -3   3   68.29    3.00
  10   3   3   63.99    7.00
  10   3   3   65.79    6.70
  11  -3   3  689.83   28.50
  11  -3   3  665.63   16.60
 -11  -3  -3  663.23   25.60
  11   3   3  700.63   23.70
  11   3   3  661.43   22.60
  12  -3   3   12.50    5.80
 -12  -3  -3   11.60    5.20
  12  -3   3   21.20    3.00
  12   3   3   17.40    4.90
  13  -3   3   60.89    9.80
  13  -3   3   64.49    5.00
 -13  -3  -3   48.40    8.40
  13   3   3   57.19    8.30
  14  -3   3   -9.50    4.30
 -14  -3  -3   -2.80    3.80
  14  -3   3    4.30    2.80
  14   3   3    0.50    4.10
  15  -3   3   84.19   12.50
  15  -3   3   82.99    6.60
  15   3   3   70.09    9.50
  16  -4  -3   -3.90    4.60
  16  -4  -3    6.20    4.20
  16   4  -3   -1.80    4.80
  15  -4  -3   96.19    8.50
  15  -4  -3  113.89   11.30
  15   4  -3  110.79   11.50
  14  -4  -3  100.39   10.80
  14  -4  -3  110.09    8.40
  14   4  -3  119.29   11.60
  13  -4  -3  271.97   12.10
  13  -4  -3  277.77   16.40
  13   4  -3  221.28   15.10
  12  -4  -3    2.10    4.60
 -12  -4   3    3.00    1.10
  12  -4  -3    2.40    2.70
  12   4  -3    7.10    4.40
 -11  -4   3   92.19    5.50
  11  -4  -3  112.39   10.00
  11  -4  -3  103.49    6.70
 -11  -4   3   96.49    5.60
  11   4  -3   87.29    9.20
  10  -4  -3   20.60    5.30
 -10  -4   3   17.40    3.30
 -10  -4   3   17.50    3.10
 -10  -4   3   22.20    3.20
  10  -4  -3   24.50    3.70
  10   4  -3   16.80    4.80
  -9  -4   3 1064.59   26.80
   9  -4  -3 1096.09   33.70
  -9  -4   3 1107.09   29.00
   9  -4  -3 1090.29   27.60
  -9  -4   3 1193.18   31.30
   8  -4  -3   15.60    4.30
  -8  -4   3   27.30    4.20
  -8  -4   3   25.50    3.00
   8  -4  -3   22.80    3.20
   8   4  -3   26.30    4.90
  -7  -4   3 1145.29   30.00
  -7  -4   3 1124.49   26.30
   7  -4  -3 1135.79   27.40
   7   4  -3 1111.09   31.60
  -6  -4   3  602.24   19.00
  -6  -4   3  597.44   15.30
   6  -4  -3  643.64   16.90
   6   4  -3  606.04   20.10
  -5  -4   3  798.52   22.80
   5  -4  -3  810.62   20.40
  -5  -4   3  782.52   22.20
   5   4  -3  795.52   23.40
  -5   4   3  788.12   18.80
   4  -4  -3   85.59    4.80
  -4  -4   3   88.39    5.80
  -4   4   3   88.09    4.50
   4   4  -3   81.39    6.00
  -3  -4   3 5754.22  179.68
   3  -4  -3 5745.52  164.38
   3   4  -3 5792.32  178.58
   2  -4  -3   80.19    4.70
  -2  -4   3   84.49    5.40
   2   4  -3   71.09    5.00
  -2   4   3   85.89    4.80
   1  -4  -3  203.18    7.90
  -1  -4   3  217.88    8.60
  -1   4   3  199.98    8.00
   1   4  -3  188.08    8.00
   0  -4   3 1126.69   27.30
   0  -4  -3 1121.49   27.40
   0   4   3 1126.59   27.60
   0   4  -3 1115.69   27.10
   1  -4   3 3554.74   74.99
   2  -4   3   32.40    4.70
  -2  -4  -3   42.20    4.10
   2  -4   3   33.30    2.90
  -2  -4  -3   34.90    3.50
   2   4   3   34.90    3.70
  -3  -4  -3  776.32   21.60
  -3  -4  -3  836.22   21.40
   3  -4   3  797.32   24.80
   3   4   3  787.02   21.80
  -4  -4  -3  985.50   24.80
  -4  -4  -3 1008.30   27.00
   4  -4   3  960.20   29.30
  -4  -4  -3  971.30   25.30
   4   4   3  940.51   26.30
   4   4   3  949.90   25.60
   5  -4   3  306.17   15.00
  -5  -4  -3  327.07   13.30
  -5  -4  -3  315.67   11.00
  -5  -4  -3  328.87   11.40
   5   4   3  309.57   12.20
   5   4   3  313.17   12.60
  -6  -4  -3  101.69    5.60
  -6  -4  -3   92.69    5.50
  -6  -4  -3  104.49    7.60
   6  -4   3   97.79    8.80
   6   4   3   98.79    6.60
   6   4   3   94.69    6.90
  -7  -4  -3   79.89    7.40
  -7  -4  -3   88.49    5.00
   7  -4   3   77.39    8.70
  -7  -4  -3   81.39    4.90
   7   4   3   79.39    6.70
   7   4   3   74.99    6.40
   8  -4   3   86.19   16.80
  -8  -4  -3   77.09    4.10
  -8  -4  -3   90.09    8.00
  -8  -4  -3   75.99    4.00
   8   4   3   82.39    7.30
   8   4   3   87.09    6.90
  -9  -4  -3  602.14   26.70
   9  -4   3  635.54   26.10
   9   4   3  642.64   21.40
   9   4   3  647.94   22.20
 -10  -4  -3   34.00    6.50
  10  -4   3   27.60    6.70
  10  -4   3   33.90    1.60
  10   4   3   32.20    5.60
 -11  -4  -3   22.70    5.90
  11  -4   3   22.00    2.10
  11  -4   3   18.60    6.30
  11   4   3   21.00    5.40
  12  -4   3   79.29    4.20
 -12  -4  -3   77.49    9.80
  12  -4   3   54.69   10.10
  12   4   3   74.79    9.30
  13  -4   3   66.59   10.90
  13  -4   3   61.99    4.40
 -13  -4  -3   53.49    8.50
  13   4   3   68.19    9.10
  14  -4   3   15.70    3.10
  14  -4   3   11.90    6.90
 -14  -4  -3   27.00    6.60
  14   4   3   11.00    5.80
 -15  -4  -3   30.20    7.10
  15  -4   3   27.30    8.50
  15  -4   3   28.60    4.10
  15   4   3   40.70    7.90
  16  -5  -3   83.29   11.70
  16  -5  -3   72.49    8.50
  16   5  -3   71.89   11.50
  15  -5  -3  114.49   11.80
  15  -5  -3  109.29    8.70
  15   5  -3   85.49   12.30
  14  -5  -3   52.59    6.50
  14  -5  -3   42.20    8.50
  14   5  -3   39.60    8.50
  13  -5  -3  304.67   12.70
  13  -5  -3  278.67   17.40
  13   5  -3  300.77   17.60
  12  -5  -3  129.19    8.00
 -12  -5   3  137.79    6.90
 -12  -5   3  124.49    6.60
  12  -5  -3  130.69   11.90
  12   5  -3  126.79   11.70
 -11  -5   3  748.73   21.70
  11  -5  -3  770.72   21.70
 -11  -5   3  729.13   20.70
  11  -5  -3  787.62   29.20
  11   5  -3  758.32   27.90
 -10  -5   3    0.70    1.80
  10  -5  -3    0.20    2.10
 -10  -5   3    1.10    2.50
 -10  -5   3    4.80    2.70
  10  -5  -3   -4.80    2.60
  10   5  -3    1.30    3.70
   9  -5  -3  534.15   16.20
   9  -5  -3  542.55   22.00
  -9  -5   3  546.35   17.80
  -9  -5   3  571.24   18.60
  -9  -5   3  544.55   15.90
   9   5  -3  540.85   21.20
  -8  -5   3  309.07   12.70
  -8  -5   3  299.27   13.00
   8  -5  -3  318.17   11.20
  -8  -5   3  325.97   10.70
   8   5  -3  341.17   15.80
  -7  -5   3 1281.27   33.80
   7  -5  -3 1315.47   31.40
  -7  -5   3 1328.07   30.40
  -7  -5   3 1300.57   34.50
   7   5  -3 1289.97   36.30
  -6  -5   3   79.29    6.30
  -6  -5   3   86.19    6.80
   6  -5  -3   87.79    5.30
   6   5  -3   78.29    7.10
  -5  -5   3 1139.49   30.50
   5  -5  -3 1186.18   28.20
  -5  -5   3 1106.79   30.70
   5   5  -3 1129.49   31.60
  -5   5   3 1150.68   26.60
  -4  -5   3   25.00    4.00
  -4  -5   3   32.00    4.50
   4  -5  -3   25.80    3.30
   4   5  -3   22.00    4.00
  -4   5   3   30.70    3.20
   3  -5  -3  295.57   10.40
   3   5  -3  272.77   11.70
  -3   5   3  295.67   10.30
  -2  -5   3  328.87   12.30
   2  -5  -3  333.17   11.50
  -2   5   3  338.87   11.50
   2   5  -3  341.17   12.70
   1  -5  -3 2090.19   47.60
  -1  -5   3 2044.00   48.10
  -1   5   3 2130.09   47.80
   1   5  -3 2098.39   48.30
   0  -5   3  117.89    6.50
   0  -5  -3  136.59    6.90
   0   5  -3  136.69    6.90
   0   5   3  119.99    6.50
   1  -5   3 2976.00   65.09
  -1  -5  -3 3004.60   66.09
   1   5   3 3017.40   66.49
  -2  -5  -3  395.76   14.20
   2  -5   3  428.06   12.60
   2   5   3  396.76   16.30
  -3  -5  -3 1840.92   43.80
  -3  -5  -3 1825.12   42.90
   3  -5   3 1773.62   46.80
   3   5   3 1835.72   43.80
  -4  -5  -3   88.69    5.90
  -4  -5  -3   76.99    5.90
   4  -5   3   69.19    7.40
   4   5   3   73.09    6.00
   4   5   3   82.69    6.70
   5  -5   3    2.70    3.00
  -5  -5  -3   -0.70    1.60
  -5  -5  -3   -4.70    1.70
  -5  -5  -3    2.60    2.30
   5   5   3    0.20    1.90
   5   5   3   -2.80    2.10
  -6  -5  -3  431.56   14.50
   6  -5   3  435.16   19.70
  -6  -5  -3  471.95   17.30
  -6  -5  -3  451.45   15.00
   6   5   3  439.76   16.40
   6   5   3  442.06   16.90
   7  -5   3 1542.95   46.70
  -7  -5  -3 1681.43   42.90
  -7  -5  -3 1638.54   38.40
  -7  -5  -3 1574.64   38.40
   7   5   3 1622.34   41.70
   7   5   3 1591.74   42.40
  -8  -5  -3  419.46   13.20
  -8  -5  -3  393.46   13.00
   8  -5   3  427.76   20.70
  -8  -5  -3  423.56   17.50
   8   5   3  398.26   16.50
   8   5   3  371.86   17.00
  -9  -5  -3    3.60    3.40
  -9  -5  -3    1.20    1.60
  -9  -5  -3    1.40    1.70
   9  -5   3   -2.10    3.50
   9   5   3    0.80    3.40
 -10  -5  -3  416.26   18.60
  10  -5   3  381.76    9.30
  10  -5   3  378.86   20.90
  10   5   3  427.96   17.90
  10   5   3  410.86   18.40
  11  -5   3  121.29   12.90
  11  -5   3  145.79    4.70
 -11  -5  -3  155.08   11.60
  11   5   3  133.79   11.10
  12  -5   3  122.39   13.60
  12  -5   3  123.19    5.00
 -12  -5  -3  146.09   11.80
  12   5   3  144.99   11.70
  13  -5   3   14.00    6.50
 -13  -5  -3   -0.50    4.00
  13   5   3    8.20    5.20
 -14  -5  -3  131.89   12.10
  14  -5   3  162.18   17.80
  14  -5   3  148.79    6.70
  14   5   3  136.99   12.70
  15  -5   3   40.00    9.90
 -15  -5  -3   55.79    9.50
  15  -5   3   50.79    4.70
  15   5   3   61.89   10.10
  16  -6  -3    1.20    3.70
  16  -6  -3   -5.50    5.10
  16   6  -3   -1.60    5.20
  15  -6  -3  106.39    8.50
  15  -6  -3  121.09   12.90
  15   6  -3   92.19   12.60
  14  -6  -3  155.68    9.50
  14  -6  -3  161.58   14.60
  14   6  -3  162.08   14.30
 -13  -6   3   84.89    5.50
  13  -6  -3  109.49   11.40
 -13  -6   3   83.89    5.40
  13  -6  -3   85.39    7.10
  13   6  -3   96.69   12.00
 -12  -6   3   24.10    4.60
 -12  -6   3   17.60    3.30
  12  -6  -3   23.00    6.60
 -12  -6   3   19.50    4.10
  12  -6  -3   21.70    4.10
  12   6  -3   24.00    6.60
  11  -6  -3  232.38   10.40
  11  -6  -3  219.88   15.40
 -11  -6   3  251.17   10.20
 -11  -6   3  250.97   11.70
  11   6  -3  226.08   14.70
 -10  -6   3  272.37   12.20
 -10  -6   3  261.47   12.40
  10  -6  -3  262.97   10.70
 -10  -6   3  254.07   10.30
  10  -6  -3  256.47   15.70
  10   6  -3  250.27   15.00
  -9  -6   3    6.40    3.40
   9  -6  -3    5.00    2.50
  -9  -6   3   10.60    3.50
  -9  -6   3    4.90    2.20
   9  -6  -3    2.10    3.50
   9   6  -3    1.40    3.80
  -8  -6   3   46.60    6.40
   8  -6  -3   42.00    4.40
  -8  -6   3   48.10    4.20
  -8  -6   3   50.19    6.10
   8   6  -3   44.10    6.90
   7  -6  -3  207.88    8.90
  -7  -6   3  199.88   10.60
  -7  -6   3  198.48   10.60
   7   6  -3  213.18   12.20
   6  -6  -3  249.88    9.90
  -6  -6   3  256.97   11.90
  -6  -6   3  262.57   12.30
   6   6  -3  264.27   13.70
   5  -6  -3  972.20   25.20
  -5  -6   3  973.00   27.80
  -5  -6   3  934.01   27.90
   5   6  -3  969.50   29.00
  -5   6   3  953.70   23.70
   4  -6  -3    3.90    2.20
  -4  -6   3    6.40    3.10
  -4  -6   3    3.50    2.30
   4   6  -3    2.20    2.60
  -4   6   3    3.70    2.00
   3  -6  -3 1496.75   35.80
  -3  -6   3 1452.15   37.70
   3   6  -3 1458.05   38.20
  -3   6   3 1489.75   35.60
   2  -6  -3  371.96   12.90
  -2  -6   3  349.57   13.60
   2   6  -3  386.66   14.40
  -2   6   3  344.77   12.60
  -1  -6   3  814.32   25.90
   1  -6  -3  775.92   22.10
  -1   6   3  790.62   22.50
   1   6  -3  784.72   22.90
   0  -6  -3 1075.29   28.70
   0  -6   3 1083.29   28.80
   0   6   3 1111.79   32.30
   0   6  -3 1135.09   28.70
   1  -6   3 1772.72   41.70
  -1  -6  -3 1787.32   42.60
  -1  -6  -3 1770.72   43.50
   1   6   3 1708.43   42.70
  -2  -6  -3  249.97   10.70
   2  -6   3  237.78    9.50
  -2  -6  -3  243.58   11.20
   2   6   3  230.68   10.90
  -3  -6  -3  395.36   14.50
  -3  -6  -3  414.96   15.40
   3   6   3  392.66   15.00
   4  -6   3  213.58   12.70
  -4  -6  -3  219.48   10.30
  -4  -6  -3  203.98   10.40
   4   6   3  211.58   10.60
   5  -6   3 2444.76   62.99
  -5  -6  -3 2401.26   57.09
  -5  -6  -3 2479.75   56.49
   5   6   3 2389.26   57.99
   5   6   3 2412.86   58.99
  -6  -6  -3  237.58   12.00
   6  -6   3  207.38   13.50
  -6  -6  -3  204.28   10.10
  -6  -6  -3  238.58   11.10
   6   6   3  209.68   11.90
   6   6   3  230.58   11.80
   7  -6   3   30.30    7.10
  -7  -6  -3   34.00    5.80
  -7  -6  -3   38.00    5.00
  -7  -6  -3   40.50    5.20
   7   6   3   23.50    5.30
   7   6   3   21.50    4.70
   8  -6   3 1156.08   39.40
  -8  -6  -3 1162.78   30.40
  -8  -6  -3 1176.48   39.80
   8   6   3 1144.09   34.30
   8   6   3 1211.78   35.60
  -9  -6  -3  944.51   25.30
  -9  -6  -3  981.00   25.60
   9  -6   3  969.10   21.90
  -9  -6  -3  969.50   31.00
   9  -6   3  989.60   36.10
   9   6   3  987.90   31.90
   9   6   3  960.60   30.80
  10  -6   3  531.45   25.60
 -10  -6  -3  480.15   20.70
 -10  -6  -3  514.45   14.50
  10  -6   3  502.05   12.50
 -10  -6  -3  512.35   14.50
  10   6   3  494.65   21.60
  10   6   3  495.55   20.90
  11  -6   3    3.10    1.40
  11  -6   3    6.40    5.20
 -11  -6  -3   -2.50    3.50
  11   6   3   -3.60    4.00
  12  -6   3  231.98    7.20
 -12  -6  -3  212.68   14.20
  12  -6   3  216.38   17.50
  12   6   3  204.98   14.20
  13  -6   3  167.78    6.30
  13  -6   3  147.29   15.50
 -13  -6  -3  160.28   12.90
  13   6   3  142.59   12.80
  14  -6   3   10.80    6.60
 -14  -6  -3   12.30    5.30
  14  -6   3    8.40    2.20
  14   6   3   13.00    6.00
  15  -6   3   62.89   11.20
  15  -6   3   35.60    4.00
 -15  -6  -3   31.80    7.60
  15   6   3   24.80    7.40
  16  -7  -3   34.90   16.90
  16  -7  -3   57.09    7.00
  16   7  -3   78.59   15.10
  15  -7  -3  160.08   15.40
  15  -7  -3  132.29    9.40
  15   7  -3  135.39   14.60
 -14  -7   3    0.70    1.90
  14  -7  -3   -2.30    4.90
 -14  -7   3    0.60    1.90
  14   7  -3   -2.20    4.40
  13  -7  -3   71.39    6.50
 -13  -7   3   58.29    5.90
 -13  -7   3   55.79    5.50
 -13  -7   3   57.59    5.20
  13  -7  -3   82.89   11.60
  13   7  -3   51.89   10.20
 -12  -7   3  363.06   14.80
 -12  -7   3  383.26   13.50
  12  -7  -3  400.96   21.70
  12  -7  -3  399.06   14.70
  12   7  -3  366.66   20.60
  11  -7  -3  527.65   24.70
 -11  -7   3  527.35   16.70
  11  -7  -3  508.35   17.00
 -11  -7   3  512.75   18.80
 -11  -7   3  508.65   18.50
  11   7  -3  500.95   23.20
  10  -7  -3   42.70    5.20
 -10  -7   3   43.10    4.70
  10  -7  -3   42.60    7.80
 -10  -7   3   25.30    5.90
 -10  -7   3   45.70    6.40
  10   7  -3   45.10    8.10
  -9  -7   3  719.63   20.30
   9  -7  -3  682.83   20.50
  -9  -7   3  683.63   23.30
  -9  -7   3  702.53   23.70
   9   7  -3  719.03   27.20
   8  -7  -3  488.15   15.80
  -8  -7   3  482.95   15.30
  -8  -7   3  492.25   18.70
  -8  -7   3  458.55   17.90
   8   7  -3  454.75   20.10
   7  -7  -3  129.39    7.40
  -7  -7   3  135.99    9.10
  -7  -7   3  148.39    9.60
   7   7  -3  125.89   10.10
   6  -7  -3    1.80    2.20
  -6  -7   3    4.70    3.10
  -6  -7   3    0.90    3.20
   6   7  -3    4.40    3.50
   5  -7  -3  569.04   17.40
  -5  -7   3  517.75   19.20
  -5  -7   3  540.15   20.20
   5   7  -3  536.55   21.00
   4  -7  -3  535.25   16.60
  -4  -7   3  495.75   18.40
  -4  -7   3  486.15   17.90
   4   7  -3  452.25   18.10
  -4   7   3  496.05   15.80
   3  -7  -3  137.09    7.80
  -3  -7   3  149.19    9.10
  -3  -7   3  136.69    9.00
  -3   7   3  153.58    8.20
   3   7  -3  148.79    9.40
   2  -7  -3  320.07   12.60
  -2  -7   3  320.67   13.70
  -2   7   3  348.87   15.00
   2   7  -3  317.77   13.60
   1  -7  -3  109.29    7.30
  -1  -7   3  117.89    7.80
  -1   7   3  114.09    7.50
   1   7  -3  108.29    7.60
   0  -7   3 1981.20   48.40
   0  -7  -3 2006.50   48.40
   0   7   3 2063.89   49.10
   1  -7   3   39.40    5.20
  -1  -7  -3   42.30    5.30
  -1  -7  -3   46.50    5.90
   1   7   3   40.90    5.50
  -2  -7  -3  136.29    8.70
   2  -7   3  138.29    7.70
  -2  -7  -3  134.29    8.10
   2   7   3  148.39    9.00
  -3  -7  -3 1078.99   30.10
  -3  -7  -3 1062.09   31.00
   3  -7   3 1134.79   28.60
   3   7   3 1064.09   30.80
   4  -7   3  241.18   14.10
  -4  -7  -3  219.18   11.00
  -4  -7  -3  234.08   11.70
   4   7   3  221.88   11.70
  -5  -7  -3    0.00    2.60
   5  -7   3   -5.40    2.50
  -5  -7  -3    2.90    2.70
   5   7   3    2.00    2.90
   6  -7   3  270.57   16.40
  -6  -7  -3  293.27   13.50
  -6  -7  -3  294.67   12.80
   6   7   3  314.37   15.40
   6   7   3  303.07   14.80
  -7  -7  -3  648.94   21.20
  -7  -7  -3  677.93   21.90
   7  -7   3  665.53   27.50
  -7  -7  -3  682.63   27.80
   7   7   3  647.34   24.20
   7   7   3  619.54   23.20
  -8  -7  -3   11.40    4.50
   8  -7   3   16.80    2.70
   8  -7   3   28.00    7.00
  -8  -7  -3   13.40    4.00
  -8  -7  -3   15.20    3.90
   8   7   3   19.70    5.40
   8   7   3   14.50    5.10
  -9  -7  -3    1.70    3.00
  -9  -7  -3    1.40    3.40
   9  -7   3    1.20    4.60
   9  -7   3    5.10    2.00
  -9  -7  -3    0.20    2.80
   9   7   3    0.50    3.30
   9   7   3    4.00    4.40
 -10  -7  -3   94.89    6.70
 -10  -7  -3  102.29    9.70
  10  -7   3   91.79    4.80
  10  -7   3   96.69   12.90
  10   7   3   95.59    9.30
  10   7   3  110.69   10.30
  11  -7   3  255.57   19.10
 -11  -7  -3  295.37   10.20
 -11  -7  -3  295.47   10.20
  11  -7   3  292.37    9.10
 -11  -7  -3  327.87   17.00
  11   7   3  273.77   16.70
  12  -7   3   18.70    7.80
 -12  -7  -3   13.90    5.30
  12  -7   3   20.80    2.70
  12   7   3   20.50    6.80
 -13  -7  -3   44.90    7.90
  13  -7   3   33.20    3.40
  13  -7   3   35.30   10.00
  13   7   3   46.20    9.00
  14  -7   3    3.90    7.10
  14  -7   3   17.40    2.70
 -14  -7  -3    5.20    5.20
  14   7   3   13.40    5.90
 -15  -7  -3  122.59   12.30
  15  -7   3  127.29    6.20
  15   7   3  110.29   14.10
  15  -8  -3   31.50   10.70
  15  -8  -3   35.40    6.00
  14  -8  -3   41.20    6.30
  14  -8  -3   74.59   12.10
 -14  -8   3   58.69    5.70
 -14  -8   3   72.49    7.70
  14   8  -3   71.49   11.60
  13  -8  -3  280.87   19.80
 -13  -8   3  285.27   11.50
 -13  -8   3  308.17   13.40
 -13  -8   3  264.37   12.70
  13   8  -3  272.57   18.70
  12  -8  -3    5.80    5.00
 -12  -8   3    8.40    4.40
  12  -8  -3   15.00    3.90
 -12  -8   3   11.70    3.20
  12   8  -3    5.40    5.20
  11  -8  -3   12.50    6.20
 -11  -8   3   27.00    4.30
 -11  -8   3   19.40    4.90
 -11  -8   3   24.50    5.40
  11  -8  -3   18.10    4.20
  11   8  -3   20.70    6.90
  10  -8  -3  321.67   19.20
  10  -8  -3  320.57   13.00
 -10  -8   3  328.27   15.10
 -10  -8   3  298.27   12.30
 -10  -8   3  329.07   15.40
  10   8  -3  309.77   17.90
  -9  -8   3  230.08   12.90
   9  -8  -3  247.88   11.00
  -9  -8   3  228.18   13.10
  -9  -8   3  235.48   10.50
   9   8  -3  219.18   14.80
  -8  -8   3   18.80    4.90
  -8  -8   3   36.10    6.20
   8  -8  -3   33.70    4.90
   8   8  -3   29.80    6.70
  -7  -8   3  338.97   15.70
  -7  -8   3  345.77   16.00
   7  -8  -3  342.37   13.30
   7   8  -3  353.26   17.40
  -6  -8   3  745.43   28.90
  -6  -8   3  776.02   25.80
   6  -8  -3  770.92   22.60
   6   8  -3  771.92   27.20
  -5  -8   3  375.16   16.60
  -5  -8   3  410.86   17.50
   5  -8  -3  420.96   14.90
   5   8  -3  379.56   17.50
  -4  -8   3  526.55   20.00
   4  -8  -3  551.84   18.10
  -4  -8   3  520.95   19.80
   4   8  -3  543.45   20.80
  -4   8   3  518.25   17.20
   3  -8  -3  318.57   13.00
  -3  -8   3  318.57   14.40
  -3   8   3  313.77   12.80
  -2  -8   3  834.32   25.90
   2  -8  -3  801.62   24.20
  -2  -8   3  807.12   25.70
  -2   8   3  812.32   24.60
   2   8  -3  831.62   26.10
   1  -8  -3   12.40    3.50
  -1  -8   3   14.20    4.00
  -1  -8   3   21.20    4.50
  -1   8   3   25.40    4.70
   1   8  -3   13.80    3.80
   0  -8  -3  810.72   24.80
   0  -8   3  824.12   25.10
   0   8   3  818.32   25.30
   1  -8   3    9.60    3.60
  -1  -8  -3   12.40    4.20
  -1  -8  -3   12.70    3.80
   1   8   3    7.80    3.60
  -2  -8  -3 1213.78   35.20
   2  -8   3 1298.07   33.90
  -2  -8  -3 1250.67   35.70
   2   8   3 1315.67   35.90
  -3  -8  -3   41.50    7.20
  -3  -8  -3   64.19    6.90
   3  -8   3   61.69    5.80
   3   8   3   51.79    6.80
  -4  -8  -3  204.58   11.10
  -4  -8  -3  198.38   11.50
   4   8   3  190.08   13.40
   5  -8   3  468.85   22.20
  -5  -8  -3  489.35   19.10
  -5  -8  -3  499.75   18.50
   5   8   3  512.55   20.00
  -6  -8  -3  305.67   13.80
  -6  -8  -3  301.67   14.30
   6  -8   3  304.97   17.80
   6   8   3  294.57   15.20
  -7  -8  -3   -0.80    2.50
  -7  -8  -3    3.30    2.90
   7  -8   3    3.50    2.30
   7  -8   3    2.90    3.60
  -7  -8  -3    4.40    3.60
   7   8   3   -1.10    3.20
   7   8   3    0.50    3.60
  -8  -8  -3   42.50    6.30
   8  -8   3   29.40    7.70
   8  -8   3   47.40    4.40
  -8  -8  -3   39.70    6.90
  -8  -8  -3   57.79    7.10
   8   8   3   33.90    7.20
   8   8   3   46.20    7.80
   9  -8   3  302.27   10.60
  -9  -8  -3  291.67   13.70
  -9  -8  -3  286.97   13.30
   9  -8   3  270.57   19.00
  -9  -8  -3  322.87   16.30
   9   8   3  293.87   17.00
   9   8   3  299.07   16.70
 -10  -8  -3    6.10    4.20
  10  -8   3   11.30    2.60
  10  -8   3    2.60    4.80
 -10  -8  -3    8.20    3.90
 -10  -8  -3    3.90    3.20
  10   8   3    2.50    5.00
  11  -8   3   57.19   10.60
 -11  -8  -3   49.99    5.40
 -11  -8  -3   63.49    8.90
 -11  -8  -3   49.60    5.60
  11  -8   3   50.79    4.30
  11   8   3   41.00    8.70
 -12  -8  -3  116.79   11.10
  12  -8   3  120.99    6.00
  12  -8   3  107.29   18.00
 -12  -8  -3  126.29    6.10
 -12  -8  -3  126.09    6.20
  12   8   3  140.79   12.90
 -13  -8  -3  115.99   11.60
  13  -8   3  133.49   17.20
  13  -8   3  112.79    5.90
  13   8   3   97.19   12.50
 -14  -8  -3   19.70    6.00
  14  -8   3   12.80    2.80
  14   8   3   13.60    6.60
  15  -9  -3   96.59   14.60
  15  -9  -3   86.99    8.20
 -15  -9   3   89.39    6.40
  15   9  -3   88.49   13.70
  14  -9  -3   -8.30    5.80
 -14  -9   3    0.20    3.10
  14  -9  -3    0.50    2.80
 -14  -9   3    5.60    3.70
 -14  -9   3   -0.80    2.00
 -13  -9   3   59.59    7.30
  13  -9  -3   70.89   12.20
 -13  -9   3   63.89    7.80
 -13  -9   3   65.19    6.00
  13  -9  -3   78.69    7.80
  13   9  -3   77.19   11.90
 -12  -9   3  241.78   13.30
 -12  -9   3  243.68   13.50
  12  -9  -3  214.48   17.50
 -12  -9   3  264.97   11.60
  12  -9  -3  227.28   11.90
  12   9  -3  226.88   17.60
  11  -9  -3  197.98   16.70
 -11  -9   3  206.98   10.50
 -11  -9   3  185.38   12.10
 -11  -9   3  214.68   13.10
  11   9  -3  225.98   16.30
  10  -9  -3  164.88    9.50
 -10  -9   3  174.68    9.50
 -10  -9   3  158.38   11.30
  10  -9  -3  168.88   14.60
 -10  -9   3  155.08   11.40
  10   9  -3  171.88   14.00
  -9  -9   3  234.78   13.80
  -9  -9   3  201.48   12.70
   9  -9  -3  213.28   11.00
  -9  -9   3  231.38   11.00
   9   9  -3  211.58   15.20
  -8  -9   3  169.98   11.50
  -8  -9   3  172.38   11.70
   8  -9  -3  170.08    9.50
   8   9  -3  154.98   12.70
  -7  -9   3  109.19    9.50
  -7  -9   3  118.69    9.80
   7  -9  -3  113.29    7.90
   7   9  -3   95.49   10.00
  -6  -9   3   11.50    4.50
   6  -9  -3   13.30    3.80
  -6  -9   3   11.30    4.40
   6   9  -3   12.70    5.00
   5  -9  -3  458.65   16.80
  -5  -9   3  457.45   19.20
  -5  -9   3  458.15   19.20
   5   9  -3  480.35   20.50
  -4  -9   3  925.31   29.60
  -4  -9   3  885.61   29.10
   4  -9  -3  949.31   27.30
   4   9  -3  924.61   30.50
  -3  -9   3   92.49    9.70
   3  -9  -3   82.19    7.00
  -3  -9   3   76.49    7.80
  -3   9   3   70.19    6.70
   3   9  -3   75.49    8.00
  -2  -9   3    7.10    3.50
  -2  -9   3    8.30    3.70
   2  -9  -3    3.80    2.30
  -2   9   3    3.90    2.80
   2   9  -3    9.50    3.90
  -1  -9   3  302.87   17.00
  -1  -9   3  296.27   14.20
   1  -9  -3  310.57   16.40
  -1   9   3  287.67   13.70
   0  -9  -3  968.20   29.30
   0  -9   3  999.50   29.90
   0  -9   3 1009.00   29.90
   0   9   3 1000.20   30.20
   1  -9   3  250.87   12.40
  -1  -9  -3  247.98   13.70
  -1  -9  -3  240.68   12.50
   1  -9   3  245.48   12.30
   1   9   3  243.58   13.00
  -2  -9  -3   27.60    5.20
   2  -9   3   34.30    5.70
   2  -9   3   32.90    5.50
   2   9   3   37.60    7.70
   3  -9   3 1174.58   32.70
  -3  -9  -3 1181.08   36.10
  -3  -9  -3 1168.98   34.00
   3  -9   3 1198.38   32.60
   3   9   3 1191.78   35.40
  -4  -9  -3  750.42   25.30
   4  -9   3  779.82   23.50
  -4  -9  -3  769.12   26.50
   4  -9   3  784.72   23.80
   4   9   3  783.52   27.10
   5  -9   3   60.49    5.80
   5  -9   3   55.09    9.20
  -5  -9  -3   61.59    7.50
  -5  -9  -3   73.29    7.80
   5   9   3   64.39    8.50
  -6  -9  -3  205.18   12.50
   6  -9   3  211.38   15.40
  -6  -9  -3  207.78   12.30
   6  -9   3  207.88   10.00
   6   9   3  215.38   13.50
  -7  -9  -3  270.97   14.40
  -7  -9  -3  287.17   14.40
   7  -9   3  286.97   11.80
   7  -9   3  300.57   19.10
   7   9   3  284.87   16.10
   8  -9   3  263.77   11.10
  -8  -9  -3  263.87   13.80
  -8  -9  -3  257.97   14.10
  -8  -9  -3  299.57   15.70
   8  -9   3  249.08   18.20
   8   9   3  279.37   17.00
   8   9   3  269.07   16.00
   9  -9   3   25.20    8.40
  -9  -9  -3   21.10    5.90
  -9  -9  -3   23.00    5.30
   9  -9   3   21.50    3.70
  -9  -9  -3   26.10    5.60
   9   9   3   33.00    7.00
   9   9   3   26.40    7.20
 -10  -9  -3  226.48   14.20
 -10  -9  -3  201.58   11.50
  10  -9   3  215.68    9.30
  10  -9   3  213.08   18.30
 -10  -9  -3  223.58   14.00
  10   9   3  211.58   15.40
  11  -9   3   75.79    5.60
 -11  -9  -3   63.79    6.90
 -11  -9  -3   63.09    6.80
 -11  -9  -3   52.09    8.60
  11   9   3   51.99    9.30
  12  -9   3   32.70    4.00
 -12  -9  -3   28.80    4.60
 -12  -9  -3   33.80    6.90
  12  -9   3   37.50    9.60
 -12  -9  -3   29.00    4.70
  12   9   3   33.80    8.20
 -13  -9  -3   11.10    5.50
 -13  -9  -3    9.50    2.00
  13  -9   3   36.00   10.60
 -13  -9  -3   10.80    2.70
  13  -9   3   10.10    2.80
  13   9   3   12.90    6.50
 -14  -9  -3  108.69   12.00
  14  -9   3  108.89    6.30
  15 -10  -3   10.40    4.20
 -15 -10   3    6.40    3.80
 -15 -10   3    4.10    3.60
  15  10  -3    0.20    5.80
 -14 -10   3  126.49    9.70
  14 -10  -3  101.89   15.30
  14 -10  -3  118.29    9.40
 -14 -10   3  128.59    9.90
 -14 -10   3  109.69    7.10
  14  10  -3  108.29   15.00
  13 -10  -3  149.09   16.20
 -13 -10   3  153.58   11.50
 -13 -10   3  171.68    9.50
 -13 -10   3  149.19   11.20
  13 -10  -3  161.58   10.30
 -12 -10   3   16.10    4.00
 -12 -10   3   19.30    5.60
 -12 -10   3   31.10    6.50
  12 -10  -3   43.30    9.30
  12 -10  -3   15.50    4.50
  12  10  -3   20.80    7.40
  11 -10  -3   -0.20    5.20
  11 -10  -3    5.40    3.40
 -11 -10   3    1.20    3.80
 -11 -10   3    2.70    3.00
 -11 -10   3    5.30    4.60
  11  10  -3    3.50    5.60
 -10 -10   3  290.07   15.60
  10 -10  -3  286.57   13.30
 -10 -10   3  261.27   15.60
 -10 -10   3  284.87   13.00
  10  10  -3  271.07   18.10
  -9 -10   3   17.20    5.70
  -9 -10   3   22.10    5.80
   9 -10  -3   16.90    4.30
   9  10  -3   14.60    6.60
   8 -10  -3  262.77   12.70
  -8 -10   3  264.57   15.60
  -8 -10   3  280.27   15.40
   8  10  -3  271.97   17.00
   7 -10  -3   11.80    3.90
  -7 -10   3   10.90    4.70
  -7 -10   3    8.40    4.80
   7  10  -3    6.90    4.00
   6 -10  -3  810.92   25.10
  -6 -10   3  753.02   27.30
  -6 -10   3  786.32   27.90
   6  10  -3  779.72   29.40
   5 -10  -3   71.09    6.90
  -5 -10   3   78.09    8.00
  -5 -10   3   86.99    8.80
   5  10  -3   76.99    9.80
  -4 -10   3  180.28   11.90
   4 -10  -3  172.28   10.30
  -4 -10   3  166.28   11.60
   4  10  -3  172.38   11.80
   3 -10  -3   19.90    4.40
  -3 -10   3   14.80    4.60
  -3 -10   3   13.20    4.60
   3  10  -3   24.40    5.70
  -3  10   3   20.70    4.50
   2 -10  -3  742.83   24.30
  -2 -10   3  750.82   25.90
  -2 -10   3  711.33   25.10
   2  10  -3  726.33   25.50
  -2  10   3  713.43   24.40
   1 -10  -3   83.39    7.70
  -1 -10   3   77.49    8.00
  -1 -10   3   73.89    7.80
  -1  10   3   71.89    7.50
   0 -10  -3 1030.20   32.10
   0 -10   3 1019.30   35.50
   0 -10  -3  989.80   30.50
   0 -10   3 1009.00   30.90
   0  10   3  966.70   34.90
  -1 -10  -3  240.48   12.90
   1 -10   3  220.68   12.40
   1 -10   3  209.18   12.00
  -1 -10  -3  218.18   12.80
   1  10   3  235.18   13.30
  -2 -10  -3  634.54   23.70
  -2 -10  -3  608.74   22.20
   2 -10   3  587.24   21.60
   2  10   3  635.44   23.70
  -3 -10  -3   33.50    6.10
   3 -10   3   27.70    5.10
   3 -10   3   29.30    5.40
  -3 -10  -3   28.10    6.10
   3  10   3   24.00    5.80
   4 -10   3  346.97   14.90
  -4 -10  -3  363.06   16.50
  -4 -10  -3  354.26   17.30
   4 -10   3  348.87   15.30
   4  10   3  342.47   17.30
  -5 -10  -3  113.99    9.60
   5 -10   3  131.49    8.90
  -5 -10  -3  126.89   10.70
   5 -10   3  120.99    8.50
   5  10   3  152.38   11.50
   6 -10   3  378.26   15.00
   6 -10   3  352.76   21.00
  -6 -10  -3  351.96   17.60
  -6 -10  -3  381.06   17.20
   6  10   3  383.06   19.10
   7 -10   3  134.79    8.60
  -7 -10  -3  117.19    9.80
   7 -10   3   98.89   13.50
  -7 -10  -3  130.49   11.10
   7  10   3  117.79   11.30
  -8 -10  -3  326.87   17.00
  -8 -10  -3  289.17   15.80
   8 -10   3  279.67   12.40
  -8 -10  -3  270.27   14.90
   8 -10   3  300.17   20.50
   8  10   3  294.57   17.60
  -9 -10  -3   91.29    9.90
   9 -10   3  101.09    7.30
  -9 -10  -3  106.29    9.60
  -9 -10  -3   90.89    9.40
   9 -10   3   97.49   13.90
 -10 -10  -3   83.09    8.90
 -10 -10  -3   71.49    8.40
  10 -10   3   88.99   23.70
 -10 -10  -3   77.69    9.90
  10 -10   3   86.59    6.70
 -11 -10  -3    0.30    3.60
 -11 -10  -3   -0.70    4.10
  11 -10   3   14.40    7.00
  11 -10   3   -1.30    2.50
 -11 -10  -3    4.60    3.90
  12 -10   3  317.67   12.10
  12 -10   3  286.77   22.50
 -12 -10  -3  312.97   13.90
 -12 -10  -3  290.37   13.60
 -12 -10  -3  306.47   18.00
  13 -10   3   61.79    5.50
 -13 -10  -3   60.69    5.80
 -13 -10  -3   72.19    9.90
 -14 -10  -3   51.99    8.90
  14 -10   3   41.00    4.90
 -14 -11   3   23.80    5.80
 -14 -11   3   25.50    4.30
  14 -11  -3   31.60    6.20
 -14 -11   3   19.90    6.10
  14  11  -3   23.30    9.80
  13 -11  -3   77.89   13.60
 -13 -11   3   93.19    7.70
 -13 -11   3   72.29    9.50
  13 -11  -3   74.69    8.20
  13  11  -3   78.99   12.80
 -12 -11   3  239.98   12.20
  12 -11  -3  263.27   20.00
 -12 -11   3  253.67   15.20
 -12 -11   3  244.58   15.10
  12 -11  -3  239.48   12.70
  11 -11  -3    9.20    7.60
 -11 -11   3   17.10    5.90
 -11 -11   3   16.20    4.40
 -11 -11   3    9.60    5.80
  11 -11  -3   20.20    5.00
  11  11  -3    7.90    6.10
 -10 -11   3   12.10    4.10
 -10 -11   3   19.10    6.30
  10 -11  -3   16.90    4.60
 -10 -11   3   22.80    6.70
  10  11  -3   14.20    6.40
  -9 -11   3  135.69   12.00
  -9 -11   3  100.89   10.40
   9 -11  -3  111.39    8.80
   9  11  -3  117.59   12.70
   8 -11  -3  627.34   21.90
  -8 -11   3  627.94   25.60
  -8 -11   3  653.53   25.70
   8  11  -3  619.34   27.70
   7 -11  -3   -4.40    2.50
  -7 -11   3    3.00    4.10
  -7 -11   3   -3.10    3.30
   7  11  -3    3.60    4.60
   6 -11  -3  285.37   13.80
  -6 -11   3  284.17   16.00
  -6 -11   3  278.67   16.00
   6  11  -3  278.87   17.20
  -5 -11   3   -1.80    2.20
   5 -11  -3   -2.70    2.60
  -5 -11   3   -2.40    3.40
   5  11  -3   -2.30    3.40
  -4 -11   3 1147.99   36.20
  -4 -11   3 1146.79   36.50
   4 -11  -3 1175.28   34.00
   4  11  -3 1136.69   37.30
   3 -11  -3   34.30    6.00
  -3 -11   3   42.90    7.10
  -3 -11   3   35.40    6.70
   3  11  -3   30.70    6.70
   2 -11  -3  693.43   24.50
  -2 -11   3  736.43   26.20
  -2 -11   3  715.63   26.40
  -1 -11   3  348.97   16.70
  -1 -11   3  344.77   16.90
   1 -11  -3  347.57   16.10
  -1  11   3  331.77   16.40
   0 -11  -3  469.45   19.30
   0 -11   3  459.85   19.40
   0 -11   3  487.95   20.10
   0 -11  -3  442.26   19.90
   0  11   3  454.05   19.80
   1 -11   3   21.90    5.30
  -1 -11  -3   21.20    5.70
   1 -11   3   14.20    4.50
  -1 -11  -3   11.60    4.40
   1  11   3   14.60    4.90
   2 -11   3  468.25   19.30
  -2 -11  -3  453.15   20.50
   2 -11   3  460.75   18.90
  -2 -11  -3  469.05   19.40
   2  11   3  449.86   20.10
  -3 -11  -3  588.44   23.90
   3 -11   3  570.34   21.60
  -3 -11  -3  586.34   22.50
   3 -11   3  536.05   20.80
   3  11   3  556.54   23.20
  -4 -11  -3  484.05   21.20
  -4 -11  -3  444.66   19.50
   4 -11   3  395.76   17.20
   4  11   3  469.95   21.30
  -5 -11  -3  295.87   15.70
   5 -11   3  296.87   14.90
  -5 -11  -3  270.67   16.00
   5  11   3  277.37   16.70
   6 -11   3  116.59    9.30
  -6 -11  -3  114.89   10.10
  -6 -11  -3  107.69   10.40
   6 -11   3   95.69    8.40
   6 -11   3  113.69   14.20
   6  11   3  112.39   11.10
   7 -11   3  273.67   19.70
  -7 -11  -3  268.27   16.20
  -7 -11  -3  288.77   16.20
   7 -11   3  274.67   13.20
   7  11   3  310.87   18.20
  -8 -11  -3  285.97   16.20
  -8 -11  -3  285.87   16.00
   8 -11   3  285.87   13.30
   8 -11   3  286.37   20.50
   9 -11   3   -1.50    3.00
  -9 -11  -3    4.60    4.30
  -9 -11  -3    5.20    3.80
  -9 -11  -3    6.40    4.60
 -10 -11  -3  438.16   21.30
  10 -11   3  428.36   26.90
  10 -11   3  436.46   16.30
 -10 -11  -3  429.66   19.70
 -10 -11  -3  432.16   19.20
 -11 -11  -3  102.69   10.00
 -11 -11  -3  137.59   10.70
  11 -11   3  141.19    8.70
  11 -11   3  102.59   15.40
 -11 -11  -3  134.99   12.30
  12 -11   3   34.60    5.20
 -12 -11  -3   42.20    8.20
 -12 -11  -3   39.30    6.50
 -12 -11  -3   33.20    6.30
 -13 -11  -3    1.10    3.80
 -13 -11  -3    1.30    4.70
  13 -11   3   10.60    3.60
 -13 -11  -3   14.30    4.30
  14 -12  -3  160.18   11.30
 -14 -12   3  160.88   12.70
 -14 -12   3  165.78   13.10
 -14 -12   3  167.98    9.90
  14  12  -3  165.18   17.50
 -13 -12   3   41.70    8.70
  13 -12  -3   36.90    6.40
 -13 -12   3   36.10    5.70
 -13 -12   3   22.10    6.60
  13  12  -3   43.90   11.20
  12 -12  -3    5.50    4.10
 -12 -12   3   13.70    5.60
 -12 -12   3    8.30    6.00
  12 -12  -3   22.20    7.90
  12  12  -3    5.10    6.40
  11 -12  -3    1.80    5.90
 -11 -12   3   -1.30    4.30
 -11 -12   3   -1.90    2.90
  11 -12  -3   -1.30    3.10
 -11 -12   3    3.90    5.30
 -10 -12   3  132.89   12.70
 -10 -12   3  145.89   13.20
  10 -12  -3  148.59   10.70
  10  12  -3  145.29   14.50
  -9 -12   3    4.40    5.40
   9 -12  -3    1.10    3.40
  -9 -12   3    2.50    4.60
   9  12  -3    3.90    5.80
  -8 -12   3   11.90    5.60
  -8 -12   3   19.70    6.10
   8 -12  -3   13.60    4.90
   8  12  -3   31.50    8.00
  -7 -12   3   52.49    8.80
   7 -12  -3   67.69    8.50
  -7 -12   3   55.79    9.30
   7  12  -3   66.29   10.40
  -6 -12   3 1203.58   38.70
   6 -12  -3 1149.08   35.00
  -6 -12   3 1184.08   38.90
   6  12  -3 1205.38   40.80
  -5 -12   3    2.70    4.30
  -5 -12   3   -1.00    4.30
   5 -12  -3    1.10    3.70
   5  12  -3    2.70    4.70
  -4 -12   3   28.80    6.80
  -4 -12   3   29.10    6.80
   4 -12  -3   33.90    6.60
   4  12  -3   18.80    6.50
  -3 -12   3   87.19    9.50
  -3 -12   3   96.29    9.80
   3 -12  -3   90.09    8.70
   2 -12  -3  793.02   27.40
  -2 -12   3  778.52   28.40
  -2 -12   3  790.32   29.00
   1 -12  -3   54.29    7.90
   1 -12  -3   39.70    7.10
  -1 -12   3   46.50    8.10
  -1 -12   3   37.20    6.90
   0 -12  -3  244.78   15.00
   0 -12   3  261.47   15.20
   0 -12   3  262.97   14.80
   0 -12  -3  288.77   15.30
   0  12   3  269.47   15.40
  -1 -12  -3  111.39   10.10
  -1 -12  -3  119.99   10.40
   1 -12   3  114.79   10.20
   1 -12   3  119.69   10.10
   1  12   3  106.59   10.40
   2 -12   3  507.45   21.80
  -2 -12  -3  557.94   22.60
  -2 -12  -3  530.45   23.40
   2 -12   3  544.45   21.60
   2  12   3  541.45   23.40
   3 -12   3    0.80    3.80
  -3 -12  -3    2.40    4.10
   3 -12   3    6.90    4.00
  -3 -12  -3    5.20    5.00
   3  12   3    4.60    4.40
  -4 -12  -3  205.68   13.60
  -4 -12  -3  226.28   14.90
   4 -12   3  209.08   12.40
   4 -12   3  192.88   12.30
   4  12   3  196.18   14.30
   5 -12   3   14.10    5.00
  -5 -12  -3   25.30    6.50
  -5 -12  -3   17.50    6.60
   5 -12   3   18.60    5.60
   5  12   3   14.90    6.10
   6 -12   3  320.07   21.00
   6 -12   3  317.37   15.80
  -6 -12  -3  306.57   16.90
   6 -12   3  319.67   15.30
  -6 -12  -3  311.27   17.80
   7 -12   3  262.47   13.60
   7 -12   3  256.67   19.70
   7 -12   3  264.77   14.10
  -7 -12  -3  254.87   15.40
  -7 -12  -3  267.07   16.70
  -8 -12  -3  294.67   16.30
  -8 -12  -3  269.97   16.40
   8 -12   3  268.37   13.60
   8 -12   3  209.48   22.20
   9 -12   3   33.30    9.60
  -9 -12  -3   29.50    6.40
  -9 -12  -3   47.50    8.80
  -9 -12  -3   30.00    7.50
   9 -12   3   37.70    6.10
 -10 -12  -3    0.50    4.70
  10 -12   3    3.40    3.50
 -10 -12  -3   -0.70    4.20
 -10 -12  -3   -2.90    4.30
  10 -12   3   -9.30    5.50
 -11 -12  -3    3.20    4.60
  11 -12   3    2.80    3.80
 -11 -12  -3    2.60    4.20
 -11 -12  -3   14.10    5.80
  12 -12   3  106.09    8.20
 -12 -12  -3  103.49    9.90
 -12 -12  -3   84.79    9.70
 -12 -12  -3   86.69   11.30
 -13 -12  -3   15.40    6.40
 -13 -12  -3   11.80    5.10
  13 -12   3   15.80    4.60
 -13 -12  -3   15.10    5.10
  13 -13  -3    0.50    4.10
 -13 -13   3    9.80    5.50
 -13 -13   3   10.40    5.30
  13  13  -3  -10.80    4.90
 -12 -13   3  249.58   19.10
  12 -13  -3  222.68   13.80
 -12 -13   3  252.87   16.20
 -12 -13   3  230.38   13.20
  12  13  -3  231.18   19.70
 -11 -13   3   12.30    6.20
  11 -13  -3   10.40    5.00
  11 -13  -3    5.10    6.90
 -11 -13   3    7.70    4.20
 -11 -13   3    9.90    7.20
  11  13  -3   13.40    7.30
  10 -13  -3   13.50    5.00
 -10 -13   3   15.70    6.00
  10  13  -3   11.20    7.40
   9 -13  -3    1.60    3.90
  -9 -13   3   -2.80    4.50
  -9 -13   3    4.20    5.30
   9  13  -3   -2.40    4.60
  -8 -13   3  341.37   19.30
  -8 -13   3  392.26   20.50
   8 -13  -3  332.27   16.50
   8  13  -3  359.66   21.90
  -7 -13   3   33.80    7.70
  -7 -13   3   42.60    8.40
   7 -13  -3   24.80    6.20
   7  13  -3   20.60    7.50
   6 -13  -3   49.90    7.80
  -6 -13   3   39.70    8.70
  -6 -13   3   36.80    8.10
   6  13  -3   38.80    8.90
   5 -13  -3  277.87   15.50
  -5 -13   3  290.77   17.60
  -5 -13   3  298.57   18.20
   5  13  -3  299.37   19.00
  -4 -13   3 1158.58   38.70
   4 -13  -3 1201.88   36.80
  -4 -13   3 1201.58   39.80
  -3 -13   3    5.90    4.70
   3 -13  -3    4.20    4.10
  -3 -13   3   13.20    5.50
  -2 -13   3  183.08   13.20
   2 -13  -3  160.98   12.80
  -2 -13   3  171.28   13.00
   2 -13  -3  175.38   12.30
   1 -13  -3  197.18   13.30
   1 -13  -3  199.48   14.30
  -1 -13   3  186.48   13.20
  -1 -13   3  181.88   13.50
   0 -13  -3  753.62   29.20
   0 -13   3  723.53   28.00
   0 -13   3  702.93   26.90
   0 -13  -3  741.03   27.40
  -1 -13  -3    6.70    3.80
   1 -13   3    8.20    4.70
  -1 -13  -3   -4.10    3.70
   1 -13   3    4.50    4.10
   2 -13   3  315.47   16.90
  -2 -13  -3  286.17   16.50
  -2 -13  -3  298.47   17.90
   2 -13   3  264.57   15.30
  -3 -13  -3   11.40    6.40
  -3 -13  -3   18.90    6.10
   3 -13   3   13.80    5.30
   3 -13   3   16.20    5.30
  -4 -13  -3  713.23   27.30
   4 -13   3  689.73   26.40
  -4 -13  -3  710.03   29.00
   4 -13   3  691.23   25.80
   5 -13   3   10.60    4.70
  -5 -13  -3   12.00    5.50
   5 -13   3    9.10    4.60
  -5 -13  -3    4.90    5.00
  -6 -13  -3   91.29   10.90
   6 -13   3  100.89    9.50
  -6 -13  -3  102.99   12.60
   6 -13   3   77.69    9.70
  -7 -13  -3    6.20    4.70
  -7 -13  -3    3.70    5.10
   7 -13   3    8.50    5.80
   7 -13   3   -2.00    4.20
   7 -13   3   -1.50    3.50
  -8 -13  -3  110.39   11.90
  -8 -13  -3  104.49   13.00
   8 -13   3  116.39    9.50
   8 -13   3  108.19   15.50
   8 -13   3   97.89    9.80
   9 -13   3   11.90    7.30
   9 -13   3    3.00    4.20
   9 -13   3    3.10    3.80
  -9 -13  -3   -0.80    4.90
  -9 -13  -3    9.30    5.30
 -10 -13  -3  262.17   16.60
  10 -13   3  301.07   14.70
  10 -13   3  284.47   15.40
 -10 -13  -3  332.37   19.20
 -10 -13  -3  275.67   17.20
 -11 -13  -3   11.10    5.60
  11 -13   3   18.40    5.50
  11 -13   3   18.90    5.00
 -11 -13  -3   24.30    6.70
 -11 -13  -3   17.60    6.90
  12 -13   3   30.90    5.90
  12 -13   3   37.10    6.60
 -12 -13  -3   39.60    8.40
 -12 -13  -3   39.20    8.50
 -12 -13  -3   35.40    7.50
 -12 -14   3    2.70    4.20
  12  14  -3    8.10    7.00
  11 -14  -3    5.70    4.40
 -11 -14   3    9.50    4.40
  11  14  -3   -3.50    6.00
  10 -14  -3  235.98   14.60
 -10 -14   3  232.48   16.70
  10  14  -3  232.38   19.10
  -9 -14   3   -2.00    4.90
   9 -14  -3    0.10    3.90
   9  14  -3    0.50    4.10
  -8 -14   3    6.60    5.80
   8 -14  -3    8.40    4.40
  -7 -14   3    7.50    5.50
  -7 -14   3    8.60    5.90
   7 -14  -3   14.30    5.40
   7  14  -3    6.10    5.10
  -6 -14   3  505.95   24.10
   6 -14  -3  468.05   21.30
  -5 -14   3   72.79   11.20
   5 -14  -3   71.49    9.50
  -5 -14   3   52.69    9.50
   4 -14  -3   59.79    9.30
  -4 -14   3   69.59   10.20
   3 -14  -3   20.00    7.00
   3 -14  -3    2.30    3.80
  -3 -14   3   12.30    5.90
  -3 -14   3    9.00    5.10
  -2 -14   3  582.94   25.60
   2 -14  -3  626.44   25.10
   2 -14  -3  579.84   26.30
  -2 -14   3  657.63   27.40
  -1 -14   3   62.99    9.90
   1 -14  -3   59.99    9.90
   1 -14  -3   43.30    8.00
  -1 -14   3   53.49    8.90
   0 -14  -3  105.79   12.70
   0 -14   3  141.19   12.00
   0 -14  -3  120.59   11.30
   0 -14   3  129.29   11.10
  -1 -14  -3   22.00    6.80
  -1 -14  -3   16.20    5.80
   1 -14   3    2.40    4.10
   1 -14   3   21.70    6.40
  -2 -14  -3  820.02   30.50
   2 -14   3  783.22   30.40
  -2 -14  -3  823.82   32.40
   2 -14   3  807.72   29.50
  -3 -14  -3   34.00    7.60
  -3 -14  -3   22.70    7.50
   3 -14   3   34.40    7.20
   3 -14   3   33.30    6.80
  -4 -14  -3   91.69   11.30
   4 -14   3  103.99   10.20
   4 -14   3  112.09   11.10
  -4 -14  -3  104.79   13.20
  -5 -14  -3   16.00    6.70
   5 -14   3   13.50    5.60
  -5 -14  -3    7.80    5.60
   5 -14   3    7.30    5.10
  -6 -14  -3  208.58   15.10
  -6 -14  -3  206.18   18.80
   6 -14   3  178.68   13.10
   6 -14   3  184.08   12.70
   7 -14   3   29.10    6.30
   7 -14   3   32.40    7.10
   7 -14   3   23.20    7.40
  -7 -14  -3   45.10    8.20
  -8 -14  -3  172.78   15.20
   8 -14   3  177.58   13.00
   8 -14   3  198.58   12.60
  -8 -14  -3  176.48   14.60
  -9 -14  -3    3.40    4.90
  -9 -14  -3    2.40    4.50
   9 -14   3    1.50    3.80
   9 -14   3    2.80    4.00
 -10 -14  -3   22.40    7.30
  10 -14   3   25.60    6.90
 -10 -14  -3   14.60    6.50
  10 -14   3   21.30    5.50
 -10 -14  -3   21.80    6.50
  11 -14   3    4.70    4.90
 -11 -14  -3    1.20    5.10
  11 -14   3   -4.30    3.60
 -11 -14  -3    1.60   10.30
 -11 -14  -3    5.00    5.50
 -11 -15   3   13.60    5.80
  11 -15  -3    1.80    4.60
 -11 -15   3   -1.40    4.10
  11  15  -3    7.10    6.40
  10 -15  -3   39.80    7.70
 -10 -15   3   33.00    8.40
  10  15  -3   51.09   11.40
  -9 -15   3    3.80    6.40
  -9 -15   3   -2.30    6.70
   9 -15  -3    9.40    4.70
   9  15  -3   -9.50    4.90
  -8 -15   3  233.48   17.70
   8 -15  -3  264.07   15.90
  -7 -15   3   23.50    7.80
   7 -15  -3   28.80    6.70
   6 -15  -3    5.00    4.40
  -6 -15   3   14.70    6.50
  -5 -15   3   38.30    8.00
   5 -15  -3   51.49    8.70
   4 -15  -3  332.27   19.90
   4 -15  -3  353.96   18.80
  -4 -15   3  359.66   20.40
   3 -15  -3   15.10    5.70
   3 -15  -3    9.10    5.70
  -3 -15   3    2.40    5.10
   2 -15  -3  129.09   13.20
   2 -15  -3  158.88   13.00
  -2 -15   3  145.69   13.00
   1 -15  -3   -0.90    4.00
  -1 -15   3   -1.40    4.20
   1 -15  -3    5.30    4.80
  -1 -15   3   -2.60    4.10
   0 -15   3  569.44   25.20
   0 -15   3  543.25   25.50
   0 -15  -3  546.65   24.20
   1 -15   3   -2.80    3.70
  -1 -15  -3   -0.50    4.50
   1 -15   3    1.70    4.50
   2 -15   3  175.28   13.50
  -2 -15  -3  152.18   13.50
   2 -15   3  172.58   13.90
   3 -15   3   10.40    5.70
  -3 -15  -3    3.50    4.80
  -3 -15  -3   26.40    7.80
   3 -15   3    8.20    6.10
   4 -15   3  213.68   14.60
   4 -15   3  228.68   16.10
  -4 -15  -3  228.38   16.10
  -5 -15  -3   -3.70    4.10
   5 -15   3   -5.80    4.20
   5 -15   3    2.50    4.80
  -6 -15  -3  387.06   21.20
   6 -15   3  363.76   19.80
   6 -15   3  390.06   19.40
   7 -15   3   44.10    8.70
   7 -15   3   64.09    9.10
  -7 -15  -3   57.89    9.90
  -8 -15  -3   80.19   13.40
   8 -15   3   67.49    9.20
   8 -15   3   52.99    8.80
  -9 -15  -3    3.90    7.20
   9 -15   3   12.50    5.30
   9 -15   3    1.30    4.30
  10 -15   3   81.79   10.50
 -10 -15  -3   72.49   11.70
 -10 -15  -3   97.19   12.70
  10 -15   3   95.09    9.70
  11 -16  -3   22.00    6.50
 -11 -16   3    8.60    6.50
  10 -16  -3  232.88   15.80
 -10 -16   3  224.38   17.70
   9 -16  -3   -1.90    4.40
  -9 -16   3    0.20    6.30
  -8 -16   3   20.40    7.60
   8 -16  -3   40.30    7.90
   7 -16  -3   16.90    6.60
  -7 -16   3   14.90    6.80
   6 -16  -3  241.28   16.30
  -6 -16   3  233.58   18.10
   5 -16  -3   12.50    6.70
  -5 -16   3   14.10    7.10
   5 -16  -3   30.20    7.50
   4 -16  -3   21.70    7.40
  -4 -16   3   40.10    9.20
   4 -16  -3   23.60    6.80
  -3 -16   3    8.70    5.60
   3 -16  -3   10.80    5.40
   3 -16  -3    5.40    5.70
   2 -16  -3  209.18   15.20
  -2 -16   3  228.68   16.70
   2 -16  -3  238.08   17.50
  -1 -16   3   12.60    6.20
  -1 -16   3   -0.60    5.10
   1 -16  -3   19.10    6.90
   0 -16   3  229.78   16.60
   0 -16   3  194.08   15.50
   0 -16  -3  245.78   16.70
  -1 -16  -3  131.89   13.10
   1 -16   3  135.99   13.80
   1 -16   3  131.39   13.00
  -2 -16  -3  241.28   16.80
   2 -16   3  205.58   15.40
   3 -16   3   18.50    6.70
  -3 -16  -3    5.80    5.60
   4 -16   3  103.39   12.50
   4 -16   3  106.99   13.00
  -4 -16  -3   98.39   13.80
  -5 -16  -3    4.90    7.10
   5 -16   3   24.60    7.20
   5 -16   3   26.80    7.00
   6 -16   3   36.90    8.50
  -6 -16  -3   41.40    9.50
   6 -16   3   46.90    8.30
   7 -16   3   23.40    6.60
  -7 -16  -3   23.00    7.50
   7 -16   3   21.50    6.20
   8 -16   3   94.79   12.20
  -8 -16  -3   80.69   11.90
   8 -16   3   96.69   11.30
  -9 -16  -3   38.30    8.60
   9 -16   3   31.30    8.80
   9 -16   3   28.30    7.00
 -10 -16  -3   65.59   11.00
  10 -16   3   68.49    9.50
 -10 -16  -3   56.69   10.10
   9 -17  -3   26.20    8.60
  -9 -17   3    4.90    6.40
   8 -17  -3  278.17   18.20
  -8 -17   3  274.07   20.00
  -7 -17   3    6.30    5.70
   7 -17  -3   -0.90    4.20
   6 -17  -3    6.10    5.60
  -6 -17   3    2.30    5.70
   6 -17  -3    7.90    5.10
   5 -17  -3   -1.10    5.70
   5 -17  -3    7.80    5.70
  -5 -17   3    6.20    5.80
   4 -17  -3  132.79   12.90
  -4 -17   3  122.09   12.40
   4 -17  -3  136.89   14.60
   3 -17  -3   27.10    7.40
   3 -17  -3   12.10    6.20
  -3 -17   3   23.70    7.10
   2 -17  -3    9.80    6.40
   2 -17  -3    4.80    5.10
   1 -17  -3   22.40    8.10
  -1 -17   3   37.90   10.30
   1 -17  -3   40.20   10.00
  -1 -17   3   27.30    8.20
   0 -17   3  177.38   16.10
   0 -17   3  211.88   16.30
   1 -17   3   -3.60    4.70
   1 -17   3    1.40    5.20
   2 -17   3  155.18   14.60
   2 -17   3  169.18   14.40
  -2 -17  -3  158.98   14.40
   3 -17   3   35.40    8.20
   3 -17   3   34.80    9.40
  -3 -17  -3   55.69   10.30
  -4 -17  -3  113.59   14.20
   4 -17   3  129.29   13.40
   4 -17   3  112.99   13.70
   5 -17   3    1.20    5.50
   5 -17   3  -13.80    5.50
  -5 -17  -3  -10.80    3.60
   6 -17   3  124.89   12.00
  -6 -17  -3  120.19   14.70
   6 -17   3  112.59   14.20
   7 -17   3   11.10    6.30
   7 -17   3   35.40    8.60
  -7 -17  -3   33.60    8.80
  -8 -17  -3   95.69   13.10
   8 -17   3   84.59   11.30
   8 -17   3   77.29   12.20
   9 -17   3    3.90    6.10
   9 -17   3    4.80    6.30
   8 -18  -3    0.30    5.00
  -8 -18   3   -2.90    5.50
  -7 -18   3    7.40    6.70
   7 -18  -3    8.10    5.50
  -6 -18   3  163.08   16.00
   6 -18  -3  174.08   14.90
   5 -18  -3   11.20    5.70
  -5 -18   3   25.50    8.30
  -4 -18   3   10.50    6.10
   4 -18  -3    0.90    4.80
   3 -18  -3   38.90    8.80
  -3 -18   3   40.70    9.70
   2 -18  -3  123.29   13.20
  -2 -18   3  155.58   14.20
  -1 -18   3   -2.10    5.20
   1 -18  -3   -9.50    3.40
   0 -18   3   77.99   12.00
   0 -18  -3   73.39   11.40
  -1 -18  -3   81.59   12.00
   1 -18   3   79.49   12.30
   2 -18   3  126.49   17.60
  -2 -18  -3  115.39   14.50
  -3 -18  -3   10.30    6.20
  -4 -18  -3  213.38   17.50
  -5 -18  -3   58.19   10.70
  -6 -18  -3   64.39   11.10
  -7 -18  -3    7.10    6.40
  -7 -19   3   12.80    7.90
   7 -19  -3   17.00    7.10
  -6 -19   3   15.30    7.50
   6 -19  -3   -2.00    5.30
  -5 -19   3   15.80    7.30
   5 -19  -3   10.40    6.90
   4 -19  -3   84.29   12.70
  -4 -19   3  111.19   14.80
  -3 -19   3    3.60    6.00
   3 -19  -3    2.80    5.60
  -2 -19   3   18.20    7.50
   2 -19  -3   21.90    7.20
   1 -19  -3   19.50    7.90
  -1 -19   3   22.80    8.30
   0 -19   3   36.80    9.70
   0 -19  -3   30.50    8.70
   1 -19   3    8.30    6.40
  -1 -19  -3    8.20    5.20
  -2 -19  -3  121.09   15.70
   2 -19   3  150.28   15.00
  -3 -19  -3   11.60    6.90
   3 -19   3    6.40    6.40
  -4 -19  -3  122.99   15.20
   4 -19   3  105.19   14.30
   5 -19   3    3.90    6.00
   6 -19   3   52.59   10.30
  -6 -19  -3   33.30    9.50
  -4 -20   3   -0.40    5.00
   4 -20  -3    4.20    5.70
  -3 -20   3   17.60    8.20
   3 -20  -3    9.80    6.40
   2 -20  -3   67.09   11.80
  -2 -20   3   57.79   11.40
   1 -20  -3   10.50    6.80
  -1 -20   3   -1.90    5.60
   0 -20   3   18.90    8.60
   0 -20  -3   37.00    9.60
  -1 -20  -3   75.59   13.20
   1 -20   3   79.69   12.60
  -2 -20  -3   62.69   12.40
   2 -20   3   57.29   11.40
   3 -20   3    7.20    6.50
  -3 -20  -3    4.70    6.50
  17   0  -4  -11.10    3.90
  16   0  -4    2.60    4.40
  15   0  -4   -0.40    3.80
  14   0  -4  263.47   14.60
  14   0  -4  265.77   12.60
  13   0  -4    2.50    3.40
  13   0  -4   -0.80    2.80
  12   0  -4  404.86   15.30
  12   0  -4  385.86   19.10
  11   0  -4   -4.40    2.40
  11   0  -4   -2.50    1.90
  10   0  -4  686.43   20.50
  10   0  -4  688.33   21.70
  -9   0   4    0.70    0.60
   9   0  -4   -1.20    1.50
   9   0  -4   -0.10    2.10
  -8   0   4  204.28    6.80
   8   0  -4  198.28    9.30
   8   0  -4  187.38    8.10
  -8   0   4  195.08    6.90
   7   0  -4    2.30    2.00
   7   0  -4    0.60    1.30
  -7   0   4   -0.60    1.30
  -6   0   4   22.20    2.80
   6   0  -4   19.80    2.40
   6   0  -4   21.70    3.30
   5   0  -4    0.70    1.30
  -5   0   4   -1.40    1.00
   4   0  -4 1967.70   43.80
  -4   0   4 1951.30   43.10
   3   0  -4   -0.30    1.30
  -3   0   4   -0.30    1.30
   2   0  -4  153.18    6.30
  -2   0   4  155.58    6.20
   1   0  -4    0.30    1.30
  -1   0   4   -1.00    1.30
   1   0  -4   -0.20    1.30
   0   0   4  911.81   21.90
   0   0   4  894.11   20.70
   0   0  -4  869.71   21.80
   0   0  -4  873.11   20.50
   1   0   4    0.30    1.90
  -1   0  -4   -0.90    2.00
   1   0   4    1.20    1.40
  -1   0  -4    0.50    1.10
   2   0   4  335.87    9.00
   2   0   4  348.17   12.20
  -2   0  -4  330.57    8.00
  -3   0  -4    3.60    2.20
   3   0   4    0.00    0.80
   3   0   4   -0.30    1.60
   4   0   4 2588.04   58.89
   4   0   4 2446.36   52.09
   4   0   4 2473.95   51.79
  -4   0  -4 2520.45   58.69
  -5   0  -4    0.40    2.30
   5   0   4    0.40    1.00
   5   0   4   -0.70    0.80
   6   0   4  775.22   19.00
   6   0   4  814.02   25.90
  -6   0  -4  821.92   25.90
   6   0   4  804.02   18.50
   7   0   4    1.70    1.20
   7   0   4   -0.70    1.10
   7   0   4    3.50    3.10
  -7   0  -4    0.00    2.50
  -8   0  -4 1851.41   49.80
   8   0   4 1814.02   41.20
   8   0   4 1881.01   49.99
   8   0   4 1846.22   40.60
   9   0   4   -4.70    2.10
   9   0   4   -3.20    1.20
   9   0   4    1.10    1.80
  -9   0  -4    3.40    3.70
  10   0   4   11.60    4.80
  10   0   4   18.00    3.30
  10   0   4   15.10    3.00
 -10   0  -4   15.50    5.40
  11   0   4    0.90    2.40
 -11   0  -4   -3.70    3.30
  11   0   4   -4.40    3.10
 -12   0  -4  410.26   21.00
  12   0   4  383.76   14.70
  12   0   4  420.86   21.00
  13   0   4   -0.50    2.80
  14   0   4  257.07   17.40
  14   0   4  242.18   12.50
  17  -1  -4    2.40    4.80
  17   1  -4   -2.40    5.30
  16  -1  -4  352.36   17.80
  16  -1  -4  347.17   16.00
  16   1  -4  365.16   19.20
  15  -1  -4    7.30    3.40
  15  -1  -4   10.20    4.50
  15   1  -4    1.70    4.60
  14  -1  -4  144.19    9.80
  14  -1  -4  126.09   10.10
  14   1  -4  125.79   10.80
  13  -1  -4  124.49    9.00
  13  -1  -4  115.79    9.30
  13   1  -4  133.19   10.30
  12  -1  -4  906.81   27.70
  12  -1  -4  906.81   27.40
  12   1  -4  913.81   25.10
  12   1  -4  917.41   29.20
  11  -1  -4    9.50    3.00
  11  -1  -4    9.40    3.60
  11   1  -4    5.40    3.40
  11   1  -4    3.00    2.10
  10  -1  -4  225.58   11.00
  10  -1  -4  244.78   10.90
  10   1  -4  229.48    9.40
  10   1  -4  239.58   11.90
   9  -1  -4  312.07   12.50
   9  -1  -4  328.77   12.90
  -9  -1   4  342.87    9.90
  -9  -1   4  326.87    9.90
   9   1  -4  328.67   11.00
   9   1  -4  320.67   13.60
   8  -1  -4 1568.74   36.40
  -8  -1   4 1466.35   33.60
  -8  -1   4 1462.15   34.10
   8  -1  -4 1448.66   36.30
   8   1  -4 1447.06   33.40
  -8   1   4 1442.36   30.70
   8   1  -4 1490.55   37.40
   7  -1  -4   76.79    5.30
   7  -1  -4   84.79    5.50
  -7  -1   4   84.49    4.90
  -7  -1   4   75.89    5.10
  -7   1   4   87.59    4.10
   7   1  -4   82.99    4.00
   7   1  -4   74.29    5.60
  -6  -1   4  469.75   13.50
   6  -1  -4  459.65   13.90
   6   1  -4  433.96   14.60
  -6   1   4  470.65   12.50
   6   1  -4  405.06   13.00
  -5  -1   4   18.80    2.80
   5  -1  -4   21.10    2.90
  -5   1   4   21.90    2.60
   5   1  -4   20.30    1.20
   5   1  -4   15.00    2.80
  -4  -1   4  575.34   15.80
   4  -1  -4  583.94   15.80
  -4   1   4  576.54   15.20
   4   1  -4  582.84   16.50
  -3  -1   4  402.46   11.80
   3  -1  -4  405.16   11.80
   3   1  -4  389.86    9.20
  -3   1   4  410.06   11.60
   3   1  -4  402.66   12.30
   2  -1  -4 3953.90  117.19
  -2  -1   4 4032.00  119.99
   2   1  -4 3755.12  117.99
  -2   1   4 4171.78  120.29
   1  -1  -4  131.29    5.60
  -1  -1   4  131.59    5.40
  -1  -1   4  131.29    5.40
   1   1  -4  123.79    5.40
  -1   1   4  134.69    5.60
   1   1  -4  134.29    5.50
   0  -1  -4 1562.84   35.00
   0  -1   4 1585.84   34.70
   0  -1   4 1644.94   36.50
   0   1   4 1584.84   35.10
   0   1  -4 1596.04   36.40
  -1  -1  -4 3710.63  105.19
   1  -1   4 3191.18  103.29
   1   1   4 3526.95  104.19
  -1   1  -4 3617.94   98.29
  -2  -1  -4 3270.87   71.49
  -3  -1  -4   49.99    4.70
  -3  -1  -4   47.50    2.50
   3  -1   4   46.80    4.80
  -3  -1  -4   43.30    2.30
   3   1   4   45.30    2.90
   3   1   4   39.10    4.90
  -4  -1  -4   -0.30    2.00
   4  -1   4   -0.10    2.00
   4   1   4   -0.90    1.10
   4   1   4    1.10    1.20
   4   1   4   10.70    3.10
  -4   1  -4    1.40    2.30
  -5  -1  -4   17.90    4.20
   5  -1   4   23.30    4.60
   5   1   4   21.20    2.50
   5   1   4   17.10    4.10
   5   1   4   22.80    2.80
  -5   1  -4   21.60    4.40
   6  -1   4 2509.65   62.19
  -6  -1  -4 2630.14   61.59
   6  -1   4 2421.36   51.19
   6   1   4 2611.84   54.49
   6   1   4 2487.45   55.09
   6   1   4 2499.45   60.99
  -6   1  -4 2613.44   62.39
   7  -1   4   90.19    3.30
  -7  -1  -4  106.19    8.70
   7  -1   4   93.79    3.50
   7  -1   4   98.49    8.60
  -7   1  -4   93.19    8.60
   7   1   4  100.89    8.30
   7   1   4   92.89    5.40
   7   1   4   87.79    5.00
  -8  -1  -4   85.59    8.70
   8  -1   4   78.49    8.20
   8  -1   4   81.39    3.80
   8  -1   4   75.79    3.50
  -8   1  -4   71.99    8.10
   8   1   4   79.29    5.10
   8   1   4   71.89    5.20
   8   1   4   86.39    8.10
   9  -1   4   47.80    3.50
  -9  -1  -4   45.10    7.30
   9  -1   4   51.59    3.30
   9  -1   4   67.09   14.80
   9   1   4   51.29    7.60
  -9   1  -4   56.69    8.30
   9   1   4   46.70    4.30
   9   1   4   42.40    4.60
  10  -1   4  258.07    9.30
  10  -1   4  260.07   15.80
  10  -1   4  270.67    9.00
 -10  -1  -4  243.08   15.00
  10   1   4  274.67   12.20
  10   1   4  271.27   15.50
 -10   1  -4  256.47   15.60
  10   1   4  261.17   11.30
  11  -1   4   19.80    3.30
  11  -1   4   21.40    3.40
 -11  -1  -4    7.90    5.40
  11  -1   4    8.30    5.20
  11   1   4   19.70    4.20
  11   1   4   18.40    6.10
 -11   1  -4    5.40    4.90
  11   1   4   15.80    3.60
 -12  -1  -4   20.40    6.00
  12  -1   4   14.30    5.80
  12  -1   4   12.10    3.20
  12   1   4   25.70    6.10
  12   1   4   18.80    4.40
  13  -1   4    8.60    5.40
  13  -1   4   -1.30    2.50
 -13  -1  -4   -1.00    4.20
  13   1   4   -3.90    2.60
  14  -1   4   85.49    7.40
  14  -1   4  100.29   12.70
  15  -1   4   -0.20    3.30
  15  -1   4   11.40    5.90
  15   1   4   -1.70    4.00
  17  -2  -4    4.10    4.00
  17  -2  -4    6.20    5.10
  17   2  -4   20.10    6.60
  16  -2  -4   53.09    7.90
  16  -2  -4   40.00    7.60
  16   2  -4   35.90    8.10
  15  -2  -4   20.90    5.50
  15  -2  -4    4.00    4.60
  15   2  -4   19.80    6.40
  14  -2  -4  669.23   23.30
  14  -2  -4  650.43   24.10
  14   2  -4  663.13   25.90
  13  -2  -4    1.30    3.10
  13  -2  -4   10.90    4.30
  13   2  -4    8.80    4.50
  12  -2  -4  223.38   12.30
  12  -2  -4  213.78   11.10
  12   2  -4  209.18   12.90
  11  -2  -4   58.89    5.80
  11  -2  -4   67.49    7.00
  11   2  -4   53.59    7.00
  10  -2  -4  492.35   16.10
 -10  -2   4  462.35   13.10
 -10  -2   4  465.75   13.00
  10   2  -4  445.96   17.90
   9  -2  -4   49.40    5.50
   9  -2  -4   45.00    4.60
  -9  -2   4   41.90    4.00
  -9  -2   4   38.80    3.70
   9   2  -4   31.00    5.20
  -8  -2   4 1384.76   33.60
  -8  -2   4 1402.46   33.00
   8  -2  -4 1401.56   33.90
   8  -2  -4 1361.86   35.70
   8   2  -4 1383.96   36.40
  -7  -2   4  416.66   13.90
   7  -2  -4  415.56   13.30
  -7  -2   4  411.46   13.20
   7   2  -4  417.56   15.10
  -7   2   4  432.56   10.50
  -6  -2   4    5.50    2.20
   6  -2  -4    7.10    2.20
   6   2  -4    1.10    2.00
  -6   2   4    5.60    1.60
  -5  -2   4   53.49    4.20
   5  -2  -4   51.89    3.90
   5   2  -4   52.69    4.50
  -5   2   4   53.39    3.50
   4  -2  -4 1737.53   38.50
  -4  -2   4 1663.43   39.00
   4   2  -4 1664.33   39.80
  -4   2   4 1760.92   38.00
   3  -2  -4 1357.06   31.40
  -3  -2   4 1344.07   32.00
  -3  -2   4 1380.36   28.70
  -3   2   4 1423.96   31.40
   3   2  -4 1335.67   32.40
  -2  -2   4   25.20    2.40
  -2  -2   4   25.10    3.20
   2  -2  -4   25.80    3.00
   2   2  -4   27.70    3.40
  -2   2   4   29.00    3.30
   2   2  -4   31.20    2.60
   1  -2  -4  338.77   10.30
  -1  -2   4  334.67   10.20
  -1  -2   4  322.67   10.10
   1   2  -4  304.47   10.00
  -1   2   4  339.47   10.30
   0  -2   4 7205.48  181.28
   0  -2  -4 7270.27  188.68
   0   2   4 7265.27  189.78
   0   2  -4 7274.17  182.58
  -1  -2  -4 1149.89   27.30
   1  -2   4 1189.78   29.80
   1  -2   4 1218.48   26.50
  -1   2  -4 1188.28   30.10
  -1   2  -4 1206.58   26.00
   1   2   4 1163.98   27.50
  -2  -2  -4 1034.00   24.80
  -2  -2  -4 1101.79   25.50
   2  -2   4 1061.69   28.50
   2  -2   4 1072.79   23.30
  -2  -2  -4 1074.09   27.60
   2   2   4 1064.89   25.20
  -2   2  -4 1073.79   28.60
  -3  -2  -4  656.43   16.80
  -3  -2  -4  643.74   19.70
   3  -2   4  653.93   14.00
  -3  -2  -4  679.23   16.60
   3  -2   4  662.03   20.90
   3   2   4  673.03   17.30
  -3   2  -4  674.23   21.10
  -4  -2  -4 1976.20   47.60
  -4  -2  -4 1960.10   42.10
  -4  -2  -4 1994.30   42.40
   4  -2   4 1936.01   49.20
   4   2   4 1924.71   44.40
   4   2   4 2007.60   43.70
  -4   2  -4 2017.30   49.30
  -5  -2  -4    4.30    1.10
  -5  -2  -4    1.60    2.50
   5  -2   4    3.50    2.80
   5   2   4    4.00    3.00
   5   2   4    2.00    1.90
  -5   2  -4    0.20    2.40
   5   2   4    3.60    1.80
   6  -2   4   -0.40    2.60
  -6  -2  -4    2.00    2.80
   6   2   4    5.90    2.50
  -6   2  -4    9.60    4.10
   6   2   4   10.20    3.50
   6   2   4    5.30    2.10
   7  -2   4  463.75   19.80
  -7  -2  -4  475.55   18.80
   7   2   4  497.95   18.80
  -7   2  -4  482.05   20.20
   7   2   4  478.85   14.80
   7   2   4  472.15   15.40
  -8  -2  -4  755.42   38.90
   8  -2   4  907.21   30.60
   8   2   4  867.51   25.90
   8   2   4  853.61   28.10
   8   2   4  896.81   24.50
  -8   2  -4  904.61   30.10
   9  -2   4   67.89    2.90
   9  -2   4   71.19    9.50
  -9  -2  -4   86.79    8.80
   9  -2   4   66.89    3.00
   9   2   4   70.49    7.90
   9   2   4   81.09    6.50
   9   2   4   75.89    5.80
  -9   2  -4   57.89    8.60
  10  -2   4   51.69    8.50
  10  -2   4   42.40    3.20
 -10  -2  -4   54.59    8.00
  10  -2   4   50.79    3.20
  10   2   4   57.69    6.10
  10   2   4   57.29    5.60
  11  -2   4    2.30    1.80
 -11  -2  -4    6.40    4.70
  11  -2   4    2.30    4.20
  11  -2   4    3.60    1.80
  11   2   4   -0.50    2.70
  11   2   4    2.20    3.00
  12  -2   4  431.46   22.20
 -12  -2  -4  411.16   20.70
  12  -2   4  412.36   13.20
  12   2   4  417.06   17.30
  13  -2   4    3.10    2.30
  13  -2   4    2.60    4.80
 -13  -2  -4   -4.90    3.70
  13   2   4    6.70    3.90
  14  -2   4   31.40    4.70
 -14  -2  -4   43.40    8.30
  14  -2   4   53.39    9.70
  14   2   4   31.00    6.40
  15  -2   4   60.19    6.60
  15  -2   4   58.79   11.00
  15   2   4   59.59    8.70
  17  -3  -4    2.50    4.70
  17   3  -4   -2.20    5.60
  16  -3  -4  413.96   20.10
  16  -3  -4  454.05   19.30
  16   3  -4  417.56   22.40
  15  -3  -4    1.70    3.70
  15  -3  -4   -1.20    3.60
  15   3  -4    1.30    4.40
  14  -3  -4  246.18   12.90
  14   3  -4  253.97   15.90
  13  -3  -4   60.89    8.20
  13  -3  -4   61.79    6.70
  13   3  -4   60.69    8.90
  12  -3  -4  644.14   20.90
  12  -3  -4  637.34   24.00
  12   3  -4  672.63   24.90
  11  -3  -4   35.70    5.00
 -11  -3   4   35.10    3.60
 -11  -3   4   35.90    3.60
  11  -3  -4   35.10    6.00
  11   3  -4   41.00    6.70
 -10  -3   4  373.06   12.40
  10  -3  -4  387.36   13.90
 -10  -3   4  398.16   13.00
  10  -3  -4  363.66   16.40
  10   3  -4  409.46   17.30
   9  -3  -4  262.57   12.90
   9  -3  -4  278.17   10.90
  -9  -3   4  276.87   11.00
  -9  -3   4  287.97   10.70
   9   3  -4  267.67   13.30
  -8  -3   4  612.14   18.70
  -8  -3   4  672.13   19.80
   8  -3  -4  648.94   21.70
   8  -3  -4  683.93   18.90
   8   3  -4  684.23   22.10
  -7  -3   4   73.29    5.90
   7  -3  -4   77.99    5.00
  -7  -3   4   65.89    5.00
   7   3  -4   66.09    6.10
  -6  -3   4 4283.97   91.09
  -6  -3   4 4047.00   85.19
   6  -3  -4 4342.57   89.89
   6   3  -4 4206.28   93.09
  -6   3   4 4387.16   87.69
   5  -3  -4  415.46   12.40
  -5  -3   4  396.76   13.30
  -5  -3   4  376.36    8.70
   5   3  -4  370.76   13.90
  -5   3   4  417.16   11.60
  -4  -3   4  560.74   16.90
   4  -3  -4  582.54   16.00
  -4   3   4  608.14   15.70
   4   3  -4  563.84   17.50
  -3  -3   4  446.46   14.30
   3  -3  -4  498.85   13.90
   3   3  -4  463.35   14.80
  -3   3   4  487.15   13.60
  -2  -3   4 1387.66   31.70
   2  -3  -4 1411.06   32.60
  -2  -3   4 1389.76   33.10
   2   3  -4 1373.66   33.30
  -2   3   4 1448.46   32.60
  -1  -3   4 1531.85   35.20
   1  -3  -4 1530.15   34.90
  -1  -3   4 1487.05   35.00
  -1   3   4 1486.65   34.80
   1   3  -4 1563.14   35.30
   0  -3   4 1363.86   31.30
   0  -3  -4 1372.56   31.70
   0  -3   4 1348.86   33.00
   0   3   4 1351.66   31.80
   0   3  -4 1345.17   31.10
   1  -3   4 5267.47  140.79
   1  -3   4 5159.98  139.09
  -1  -3  -4 5216.88  154.68
   1   3   4 4864.51  159.18
   2  -3   4 1302.57   34.10
  -2  -3  -4 1249.68   31.10
  -2  -3  -4 1343.47   30.80
   2  -3   4 1327.17   28.90
   2   3   4 1324.87   31.10
  -2   3  -4 1294.47   34.00
  -3  -3  -4  550.64   16.10
  -3  -3  -4  575.14   15.80
  -3  -3  -4  568.04   18.10
   3  -3   4  597.84   19.80
   3  -3   4  566.54   13.10
   3   3   4  579.14   16.30
  -4  -3  -4  590.74   19.10
   4  -3   4  590.84   20.90
  -4  -3  -4  579.34   16.20
  -4  -3  -4  585.14   15.90
  -4   3  -4  607.64   20.80
   4   3   4  571.94   16.70
  -5  -3  -4  103.79    5.10
  -5  -3  -4  107.49    7.80
  -5  -3  -4  100.19    5.20
   5  -3   4   95.49    8.30
   5   3   4  107.69    6.20
   5   3   4   98.79    6.50
  -5   3  -4   99.99    8.30
  -6  -3  -4 3952.80   87.89
  -6  -3  -4 3810.52   79.79
   6  -3   4 3942.91   91.09
  -6  -3  -4 3832.72   79.79
  -6   3  -4 3827.82   91.79
   6   3   4 3837.12   83.99
   6   3   4 3887.71   84.69
   7  -3   4   85.39    8.80
  -7  -3  -4   70.69    7.40
   7   3   4   87.39    6.60
  -7   3  -4   76.89    8.60
   7   3   4   78.79    5.80
  -8  -3  -4   -0.40    3.60
   8   3   4    0.80    2.40
   8   3   4   -2.10    2.00
  -9  -3  -4  141.49   10.60
   9  -3   4  137.89   11.90
   9   3   4  141.59    8.50
   9   3   4  139.19    9.00
  10  -3   4  800.62   30.90
 -10  -3  -4  763.52   27.90
  10  -3   4  777.12   16.90
  10  -3   4  761.22   17.00
  10   3   4  789.52   24.30
  10   3   4  793.92   25.20
  11  -3   4    3.10    4.30
  11  -3   4    2.20    1.50
 -11  -3  -4    5.10    4.60
  11  -3   4    5.50    1.50
  11   3   4    3.80    3.70
  11   3   4    6.40    3.70
  12  -3   4   23.70    7.20
  12  -3   4   29.90    3.20
 -12  -3  -4   34.70    7.40
  12   3   4   27.80    6.10
  13  -3   4   39.80    8.80
  13  -3   4   39.80    4.00
 -13  -3  -4   31.20    7.50
  13   3   4   40.90    7.20
  14  -3   4  258.27   10.30
  14  -3   4  272.07   19.30
 -14  -3  -4  281.57   17.70
  14   3   4  237.08   14.70
  15  -3   4   -5.20    2.30
  15  -3   4   -1.50    5.20
  15   3   4    3.30    4.10
  16  -4  -4   28.40    7.10
  16  -4  -4   30.10    6.80
  16   4  -4   16.70    7.20
  15  -4  -4   11.70    4.80
  15  -4  -4   -3.40    3.80
  15   4  -4    3.00    5.30
  14  -4  -4  352.66   16.70
  14  -4  -4  320.77   17.80
  14   4  -4  337.27   18.70
  13  -4  -4   26.60    5.00
  13  -4  -4   28.20    6.30
  13   4  -4   39.90    7.50
  12  -4  -4   18.00    5.10
 -12  -4   4   22.80    3.10
  12  -4  -4   18.20    4.00
 -12  -4   4   18.70    2.90
  12   4  -4   17.60    5.50
  11  -4  -4  183.18   12.50
  11  -4  -4  203.48    9.70
 -11  -4   4  191.58    8.90
 -11  -4   4  207.78    8.80
  11   4  -4  186.78   12.70
 -10  -4   4  252.67   11.00
  10  -4  -4  259.17   10.80
  10  -4  -4  262.47   14.00
  10   4  -4  262.87   14.30
   9  -4  -4   -0.20    2.00
   9  -4  -4    0.90    2.80
  -9  -4   4   -2.40    2.20
  -9  -4   4    0.60    2.40
   9   4  -4   -2.40    2.80
  -8  -4   4  359.66   13.40
   8  -4  -4  369.86   12.60
  -8  -4   4  367.06   14.10
  -8  -4   4  366.46    9.90
   8   4  -4  367.96   15.80
  -7  -4   4 1044.50   28.70
   7  -4  -4 1125.19   27.50
  -7  -4   4 1100.79   24.10
  -7  -4   4 1100.69   29.80
   7   4  -4 1069.79   31.10
   6  -4  -4 5504.25  112.79
   6   4  -4 5279.27  116.59
  -5  -4   4  295.77   12.00
   5  -4  -4  309.07   10.60
   5   4  -4  279.97   12.30
  -5   4   4  297.07    9.70
  -4  -4   4  563.94   17.70
   4  -4  -4  551.24   15.90
  -4   4   4  572.04   15.60
   4   4  -4  534.25   17.70
   3  -4  -4  411.86   12.90
  -3  -4   4  404.06   13.80
  -3   4   4  409.66   12.70
   3   4  -4  427.46   14.50
  -2  -4   4 1793.02   41.70
   2  -4  -4 1818.82   40.80
  -2   4   4 1696.93   40.50
   2   4  -4 1796.92   42.00
  -1  -4   4    1.80    1.70
   1  -4  -4    2.80    1.80
  -1   4   4   -0.50    1.40
   1   4  -4    0.40    1.50
   0  -4   4 2560.64   55.59
   0  -4   4 2499.15   57.29
   0  -4  -4 2491.45   55.79
   0   4   4 2540.05   55.99
   0   4  -4 2535.85   55.29
   1  -4   4   14.60    3.30
  -1  -4  -4    9.70    2.50
   1  -4   4   12.50    2.40
   1   4   4   10.30    2.50
  -1   4  -4   10.70    2.10
  -2  -4  -4  103.29    6.30
   2  -4   4  108.59    5.10
   2  -4   4  125.09    8.00
  -2  -4  -4  115.39    6.20
   2   4   4  118.59    6.50
  -3  -4  -4 1595.74   38.30
   3  -4   4 1538.25   43.20
  -3  -4  -4 1620.54   37.70
   3  -4   4 1600.54   34.90
   3   4   4 1644.04   38.50
  -4  -4  -4 1131.69   28.30
  -4  -4  -4 1163.68   31.40
   4  -4   4 1159.38   33.90
  -4  -4  -4 1128.79   28.90
  -5  -4  -4   10.50    3.30
   5  -4   4   14.30    4.20
  -5  -4  -4   15.60    3.00
  -5  -4  -4   10.50    2.60
   5   4   4    9.20    3.20
   5   4   4    9.90    2.80
   6  -4   4   89.29    8.70
  -6  -4  -4   71.39    6.90
  -6  -4  -4   69.39    4.80
  -6  -4  -4   74.09    5.00
   6   4   4   73.69    6.00
   6   4   4   69.59    6.10
  -7  -4  -4  278.17    9.30
  -7  -4  -4  276.67    9.30
   7  -4   4  304.77   16.30
  -7  -4  -4  278.27   13.80
   7   4   4  291.07   12.90
   7   4   4  273.17   12.00
   8  -4   4  703.53   27.70
  -8  -4  -4  705.83   16.30
  -8  -4  -4  706.43   17.80
  -8  -4  -4  729.53   25.30
   8   4   4  705.63   22.30
   8   4   4  704.63   23.20
  -9  -4  -4    2.20    3.30
   9  -4   4    0.00    3.70
   9   4   4    6.20    3.60
   9   4   4    1.10    2.60
 -10  -4  -4  177.68   12.50
  10  -4   4  169.48   13.80
  10   4   4  153.18   11.90
  10   4   4  157.28   13.00
  11  -4   4  282.07    7.10
 -11  -4  -4  291.17   16.50
  11  -4   4  257.07   17.50
  11   4   4  281.77   14.20
  11   4   4  258.27   14.30
  12  -4   4  335.57    9.40
 -12  -4  -4  327.27   18.40
  12  -4   4  343.07   20.80
  12   4   4  328.27   16.80
  13  -4   4   26.20    3.00
 -13  -4  -4   11.60    5.70
  13  -4   4   42.50    8.50
  13   4   4   27.80    6.40
  14  -4   4   30.50    9.20
  14  -4   4   11.70    2.60
 -14  -4  -4    8.50    5.40
  14   4   4    7.10    4.80
 -15  -4  -4   60.79   10.10
  15  -4   4   52.99   10.60
  15  -4   4   63.89    5.20
  15   4   4   93.29   11.50
  16  -5  -4  180.38   11.70
  16  -5  -4  156.98   14.10
  16   5  -4  136.39   13.80
  15  -5  -4    4.00    3.70
  15  -5  -4    2.00    4.30
  15   5  -4    3.00    4.40
  14  -5  -4   77.09    8.90
  14  -5  -4   66.19    9.70
  14   5  -4   87.09   11.50
  13  -5  -4   91.79   11.10
 -13  -5   4   99.89    5.40
  13  -5  -4   90.79    7.50
 -13  -5   4  105.39    5.50
  13   5  -4   89.59   11.60
 -12  -5   4  114.59    7.20
  12  -5  -4  124.49   11.00
  12  -5  -4  107.49    7.60
  12   5  -4  119.99   10.90
  11  -5  -4   38.20    5.00
 -11  -5   4   46.00    5.40
 -11  -5   4   41.50    5.40
  11  -5  -4   37.20    8.70
  11   5  -4   56.09    8.80
 -10  -5   4  662.43   21.00
  10  -5  -4  644.54   19.60
  10  -5  -4  691.83   25.60
 -10  -5   4  674.13   16.90
 -10  -5   4  618.44   20.20
  10   5  -4  659.63   24.90
  -9  -5   4  754.02   18.60
  -9  -5   4  741.33   23.20
   9  -5  -4  754.32   26.60
   9  -5  -4  757.62   21.40
  -9  -5   4  718.53   22.40
   9   5  -4  753.32   26.30
  -8  -5   4  586.34   19.20
  -8  -5   4  578.34   15.00
   8  -5  -4  588.74   17.50
  -8  -5   4  581.24   19.70
   8   5  -4  570.24   21.50
  -7  -5   4   54.29    3.40
  -7  -5   4   44.70    5.80
   7  -5  -4   46.60    4.40
  -7  -5   4   52.99    5.50
   7   5  -4   50.49    6.80
  -6  -5   4  883.31   25.20
  -6  -5   4  899.21   26.00
   6  -5  -4  858.31   22.90
  -6   5   4  835.02   20.80
   6   5  -4  804.02   26.10
   5  -5  -4  287.77   10.70
  -5  -5   4  280.17   12.10
  -5   5   4  307.67   10.20
   5   5  -4  283.77   12.80
   4  -5  -4 2464.35   54.99
  -4  -5   4 2476.05   57.09
  -4   5   4 2456.85   54.49
   4   5  -4 2432.96   57.89
  -3  -5   4   87.39    6.30
   3  -5  -4   96.79    5.80
   3   5  -4   97.49    6.90
  -3   5   4   96.29    5.70
  -2  -5   4 1485.55   38.20
   2  -5  -4 1527.35   36.70
   2   5  -4 1582.54   38.30
  -2   5   4 1568.64   37.00
   1  -5  -4  413.76   13.60
  -1  -5   4  399.36   13.80
  -1   5   4  423.16   13.90
   1   5  -4  400.06   13.80
   0  -5   4  130.39    6.90
   0  -5  -4  131.59    7.00
   0   5  -4  145.89    7.10
   0   5   4  128.59    7.10
   1  -5   4  700.33   19.40
  -1  -5  -4  730.83   20.40
   1  -5   4  734.23   22.80
   1   5   4  680.23   23.00
   2  -5   4 3437.86   82.19
  -2  -5  -4 3485.85   78.59
   2  -5   4 3653.73   75.29
  -2  -5  -4 3502.55   76.89
   2   5   4 3524.55   77.49
  -3  -5  -4  126.59    9.00
   3  -5   4  136.09    9.50
  -3  -5  -4  127.19    7.20
   3  -5   4  122.79    5.70
   3   5   4  116.49    7.30
  -4  -5  -4  104.59    6.60
   4  -5   4  113.49    9.20
  -4  -5  -4  111.79    8.50
   4   5   4  103.49    7.10
  -5  -5  -4  310.87   11.60
  -5  -5  -4  293.27   13.40
  -5  -5  -4  291.17   11.90
   5  -5   4  284.37   15.40
   5   5   4  302.57   12.50
  -6  -5  -4  520.85   16.80
   6  -5   4  495.15   22.00
  -6  -5  -4  537.05   16.50
  -6  -5  -4  532.25   19.60
   6   5   4  555.04   18.70
   6   5   4  542.55   19.30
  -7  -5  -4    5.70    2.50
  -7  -5  -4    3.60    2.30
  -7  -5  -4    0.40    3.10
   7  -5   4    2.00    3.50
   7   5   4    1.20    2.50
   7   5   4   -1.80    2.80
  -8  -5  -4   37.70    3.80
  -8  -5  -4   43.00    4.10
  -8  -5  -4   35.00    6.10
   8  -5   4   55.99    9.10
   8   5   4   37.80    5.70
   8   5   4   43.20    7.60
  -9  -5  -4   15.30    4.80
  -9  -5  -4   10.40    2.00
  -9  -5  -4   11.00    1.90
   9  -5   4   11.80    5.30
   9   5   4   15.10    4.70
   9   5   4   13.60    4.40
 -10  -5  -4  355.06   17.70
  10  -5   4  338.17   19.90
  10   5   4  313.97   15.50
  10   5   4  341.47   16.50
  11  -5   4   47.50    9.50
 -11  -5  -4   45.00    7.80
  11  -5   4   53.39    2.10
  11   5   4   51.09    7.50
  11   5   4   58.29    8.40
  12  -5   4   32.90    8.70
 -12  -5  -4   34.20    7.30
  12  -5   4   37.00    2.40
  12   5   4   34.90    7.40
  13  -5   4  112.89    4.80
  13  -5   4  120.39   15.40
 -13  -5  -4  114.49   11.60
  13   5   4  115.49   11.20
  14  -5   4   97.49    4.90
  14  -5   4   63.89   12.20
 -14  -5  -4   84.49   10.90
  14   5   4   93.99   11.60
 -15  -5  -4    2.20    4.50
  15  -5   4   26.30    8.10
  15   5   4   16.70    5.80
  16  -6  -4   10.60    4.50
  16  -6  -4    6.90    6.00
  16   6  -4   14.30    7.20
  15  -6  -4  235.58   17.10
  15  -6  -4  233.88   12.50
  15   6  -4  238.68   17.70
  14  -6  -4  220.08   16.50
 -14  -6   4  235.38    7.60
 -14  -6   4  230.48    7.50
  14  -6  -4  255.17   12.40
  14   6  -4  243.68   17.00
  13  -6  -4    7.10    4.60
 -13  -6   4   10.60    3.30
  13  -6  -4    1.60    3.00
  13   6  -4    3.50    4.70
  12  -6  -4  117.19    7.90
 -12  -6   4  129.89    8.50
 -12  -6   4  125.99    8.00
  12  -6  -4  145.29   12.60
  12   6  -4  118.09   11.30
  11  -6  -4  520.95   23.40
  11  -6  -4  529.55   17.40
 -11  -6   4  512.15   14.30
 -11  -6   4  508.25   17.90
  11   6  -4  496.85   22.60
 -10  -6   4  305.37   13.40
  10  -6  -4  310.67   17.10
 -10  -6   4  296.07   16.10
  10  -6  -4  309.07   12.30
 -10  -6   4  296.07   10.00
  10   6  -4  302.87   16.90
   9  -6  -4   49.90    5.10
  -9  -6   4   46.60    6.60
  -9  -6   4   50.49    6.50
  -9  -6   4   56.59    4.10
   9   6  -4   56.19    8.10
  -8  -6   4  561.54   19.70
  -8  -6   4  577.74   15.80
   8  -6  -4  610.24   18.20
   8   6  -4  575.64   22.40
  -7  -6   4 1200.68   33.10
  -7  -6   4 1224.08   34.70
   7  -6  -4 1186.48   30.30
   7   6  -4 1139.19   34.80
  -6  -6   4 1088.09   30.60
   6  -6  -4 1104.09   28.20
  -6  -6   4 1069.39   31.10
  -6   6   4 1052.79   25.90
  -5  -6   4   12.40    4.00
  -5  -6   4    9.30    3.50
   5  -6  -4   11.70    2.90
  -5   6   4    8.50    2.50
   5   6  -4    5.10    3.00
  -4  -6   4 2475.55   59.59
   4  -6  -4 2634.34   57.59
   4   6  -4 2501.95   60.59
  -4   6   4 2545.25   56.99
  -3  -6   4  451.65   16.50
   3  -6  -4  473.65   15.40
  -3   6   4  475.35   15.30
   3   6  -4  469.75   17.20
   2  -6  -4  429.36   14.70
  -2  -6   4  406.26   15.30
   2   6  -4  445.16   15.90
  -2   6   4  456.95   15.40
  -1  -6   4   75.49    6.00
   1  -6  -4   84.09    6.00
  -1   6   4   83.99    6.20
   1   6  -4   81.89    6.20
   0  -6  -4  220.78   10.10
   0  -6   4  230.28   10.40
   0   6   4  236.58   10.60
   0   6  -4  245.58   10.30
  -1  -6  -4 1652.53   40.60
   1  -6   4 1639.24   39.70
   1   6   4 1679.73   41.20
   2  -6   4  149.88    7.40
   2  -6   4  135.39    9.50
  -2  -6  -4  141.49    8.40
  -2  -6  -4  128.39    7.70
   2   6   4  156.38    8.60
   3  -6   4    2.80    2.10
   3  -6   4   -1.60    2.50
  -3  -6  -4    4.70    3.00
  -3  -6  -4   -1.00    2.00
   3   6   4    2.60    2.60
  -4  -6  -4    4.60    2.80
   4  -6   4   10.00    4.00
  -4  -6  -4    2.80    2.30
   4   6   4    9.60    3.10
  -5  -6  -4  148.69    8.60
  -5  -6  -4  154.58    9.10
   5  -6   4  156.38   11.60
   5   6   4  146.69    9.20
  -6  -6  -4   63.29    7.10
  -6  -6  -4   51.79    6.00
  -6  -6  -4   64.49    5.70
   6  -6   4   46.00    7.90
   6   6   4   69.89    6.60
   6   6   4   53.99    8.20
  -7  -6  -4  126.69    7.80
   7  -6   4  102.29   10.90
  -7  -6  -4  117.79    7.50
  -7  -6  -4  113.29    9.40
   7   6   4  131.39    9.60
  -8  -6  -4  104.79    9.30
   8  -6   4   98.89   10.90
  -8  -6  -4  103.09    6.80
   8   6   4   99.19    8.50
   8   6   4   92.09    8.80
  -9  -6  -4    4.10    2.30
  -9  -6  -4    9.10    2.90
   9  -6   4   15.30    6.40
  -9  -6  -4   12.10    4.70
   9   6   4    9.90    4.30
   9   6   4    2.30    3.70
 -10  -6  -4   11.10    2.30
 -10  -6  -4    7.60    2.00
  10  -6   4    7.10    1.40
 -10  -6  -4   10.50    4.70
  10  -6   4   -1.90    4.00
  10   6   4   13.20    5.40
  10   6   4    8.00    4.30
  11  -6   4  145.79   14.60
 -11  -6  -4  152.08   12.10
  11  -6   4  128.29    4.30
  11   6   4  129.49   11.00
  11   6   4  129.19   11.60
 -12  -6  -4   96.59   10.90
  12  -6   4  100.39    3.90
  12  -6   4   96.09   13.90
  12   6   4  102.99   10.80
 -13  -6  -4  100.69   10.90
  13  -6   4   77.99    3.80
  13  -6   4   82.79   16.50
  13   6   4   79.29   10.80
  14  -6   4    0.80    6.50
  14  -6   4    5.50    1.80
 -14  -6  -4    0.90    4.50
  14   6   4    9.50    5.00
 -15  -6  -4   44.20    8.90
  15  -6   4   59.59    4.00
  15   6   4   38.40    8.70
  16  -7  -4   56.69   10.20
  16  -7  -4   61.19    7.80
  16   7  -4   54.29   11.70
  15  -7  -4    1.60    5.70
  15  -7  -4   15.50    4.30
  15   7  -4   11.40    6.70
 -14  -7   4  115.29    7.20
  14  -7  -4  117.19    8.80
  14  -7  -4  121.49   13.10
  14   7  -4  125.59   13.50
  13  -7  -4  194.78   16.00
  13  -7  -4  197.18   15.60
 -13  -7   4  186.08    9.90
  13   7  -4  184.38   15.30
  12  -7  -4  275.47   12.60
 -12  -7   4  312.97   14.00
  12  -7  -4  317.37   19.10
 -12  -7   4  279.07    9.70
 -12  -7   4  288.27   13.30
  12   7  -4  302.37   18.20
  11  -7  -4   -1.50    2.50
 -11  -7   4    2.50    3.50
 -11  -7   4    2.80    2.00
  11  -7  -4   -0.30    4.50
 -11  -7   4    2.80    3.70
  11   7  -4    4.70    4.40
 -10  -7   4  477.65   14.50
  10  -7  -4  473.75   16.60
 -10  -7   4  486.45   18.80
  10  -7  -4  446.06   22.20
  10   7  -4  493.15   22.30
  -9  -7   4  682.73   18.80
   9  -7  -4  687.23   20.90
  -9  -7   4  674.53   23.70
   9   7  -4  686.63   26.50
  -8  -7   4   88.19    5.50
   8  -7  -4  114.39    7.20
  -8  -7   4   91.59    9.80
  -8  -7   4  108.09    8.60
   8   7  -4   86.29    8.90
  -7  -7   4   69.49    7.90
  -7  -7   4   65.99    7.10
   7  -7  -4   70.59    5.80
   7   7  -4   53.39    7.80
  -6  -7   4  412.06   17.30
   6  -7  -4  442.26   15.10
  -6  -7   4  445.26   17.30
   6   7  -4  406.86   18.10
  -6   7   4  437.66   13.50
  -5  -7   4 1877.81   48.10
   5  -7  -4 1890.51   45.40
   5   7  -4 1851.71   49.40
  -5   7   4 1973.40   44.70
  -4  -7   4  821.22   26.00
  -4  -7   4  842.72   26.00
   4  -7  -4  865.31   24.10
  -4   7   4  833.12   23.60
   4   7  -4  830.72   26.70
  -3  -7   4   23.50    4.40
   3  -7  -4   23.70    4.10
  -3   7   4   28.40    4.50
   3   7  -4   19.30    4.30
  -2  -7   4 1023.60   29.60
   2  -7  -4 1109.19   29.00
  -2   7   4 1045.20   28.80
   2   7  -4 1029.70   29.90
  -1  -7   4 1559.54   40.60
   1  -7  -4 1533.75   39.80
   1   7  -4 1722.03   41.30
  -1   7   4 1604.24   40.50
   0  -7  -4  599.74   19.70
   0  -7   4  610.84   19.80
   0   7   4  626.94   20.20
   0   7  -4  627.94   19.50
  -1  -7  -4  149.29    8.80
   1  -7   4  162.18    8.60
   1   7   4  147.99    8.80
   2  -7   4  247.48   12.50
  -2  -7  -4  230.68   11.90
  -2  -7  -4  228.78   10.90
   2   7   4  239.48   11.80
  -3  -7  -4 2399.66   58.19
   3  -7   4 2369.16   54.69
   3  -7   4 2447.46   61.99
  -3  -7  -4 2373.86   56.79
   3   7   4 2417.36   58.19
  -4  -7  -4   58.09    6.00
   4  -7   4   59.09    8.20
  -4  -7  -4   60.09    6.40
   4  -7   4   57.59    5.00
   4   7   4   57.29    6.90
   5  -7   4  130.79   11.30
  -5  -7  -4  148.99    9.20
  -5  -7  -4  167.38   10.10
   5   7   4  153.88   11.60
  -6  -7  -4  969.00   28.60
   6  -7   4  975.20   34.50
  -6  -7  -4  947.81   27.80
  -6  -7  -4  974.80   30.20
   6   7   4  957.50   29.90
   7  -7   4  240.98   16.40
  -7  -7  -4  236.98   11.50
  -7  -7  -4  244.58   13.60
  -7  -7  -4  236.58   11.70
   7   7   4  225.68   12.90
  -8  -7  -4    1.60    2.80
  -8  -7  -4   -1.80    3.20
   8  -7   4   -0.60    4.10
  -8  -7  -4   -4.00    2.30
   8   7   4    1.20    3.50
   8   7   4   -4.80    2.90
  -9  -7  -4  297.87   12.30
  -9  -7  -4  286.27   12.20
   9  -7   4  295.57   19.50
  -9  -7  -4  329.97   16.60
   9   7   4  298.07   16.30
   9   7   4  287.77   15.80
  10  -7   4  169.68    6.30
 -10  -7  -4  170.68   12.60
  10  -7   4  174.08   15.40
 -10  -7  -4  165.48    8.40
 -10  -7  -4  170.58    8.30
  10   7   4  175.88   12.90
  10   7   4  160.88   12.50
 -11  -7  -4   30.60    3.20
 -11  -7  -4   38.50    7.60
  11  -7   4   39.70    3.00
  11  -7   4   48.00    9.70
 -11  -7  -4   40.20    3.40
  11   7   4   28.30    7.40
  11   7   4   39.50    7.70
  12  -7   4   13.10    2.00
 -12  -7  -4   30.40    7.10
  12  -7   4   10.80    7.60
  12   7   4   13.20    5.70
  13  -7   4  178.18    6.30
  13  -7   4  162.68   16.50
 -13  -7  -4  169.18   14.00
  13   7   4  189.88   15.00
  14  -7   4  111.29   16.10
  14  -7   4  105.99    4.80
 -14  -7  -4  132.99   12.80
  14   7   4   96.39   13.30
  15  -8  -4  170.88   11.00
  15  -8  -4  190.48   16.70
 -15  -8   4  178.28    7.90
 -15  -8   4  173.28    7.80
  14  -8  -4  109.49    8.60
  14  -8  -4  115.29   14.20
 -14  -8   4  111.99    7.90
  14   8  -4  108.09   14.60
  13  -8  -4   73.49    7.30
 -13  -8   4   75.99    7.90
  13  -8  -4   72.69   11.90
  13   8  -4   71.79   11.80
 -12  -8   4  109.29    6.30
 -12  -8   4  125.09    9.60
  12  -8  -4  136.69   13.10
 -12  -8   4  119.39    9.80
  12  -8  -4  133.89   10.10
  12   8  -4  121.29   12.60
 -11  -8   4  480.45   18.90
 -11  -8   4  475.15   19.40
 -11  -8   4  467.85   14.90
  11  -8  -4  494.15   17.80
  11  -8  -4  486.15   24.20
  11   8  -4  443.06   22.70
 -10  -8   4   85.49    8.30
  10  -8  -4   85.79    7.00
 -10  -8   4   82.19    8.70
 -10  -8   4   83.59    5.90
  10   8  -4   86.99   11.10
  -9  -8   4   11.10    4.50
  -9  -8   4   16.40    3.20
   9  -8  -4   13.80    3.70
  -9  -8   4    9.30    4.30
   9   8  -4    6.30    4.80
   8  -8  -4  293.97   12.60
  -8  -8   4  318.17   15.10
  -8  -8   4  270.67   14.50
   8   8  -4  303.07   16.30
   7  -8  -4 1030.80   29.10
  -7  -8   4 1041.30   32.20
  -7  -8   4 1119.59   33.20
   7   8  -4 1059.89   34.50
  -6  -8   4  233.88   12.90
  -6  -8   4  231.78   13.00
   6  -8  -4  246.68   11.10
   6   8  -4  233.48   13.90
  -5  -8   4  464.65   18.60
   5  -8  -4  420.86   15.80
   5   8  -4  435.26   18.60
  -5   8   4  441.56   15.30
   4  -8  -4  685.53   21.20
  -4  -8   4  642.14   22.80
  -4  -8   4  685.33   23.60
  -4   8   4  654.43   20.70
   4   8  -4  673.23   23.90
  -3  -8   4 1040.90   36.10
   3  -8  -4 1095.99   30.20
  -3  -8   4 1112.79   32.10
  -3   8   4 1093.59   30.20
   3   8  -4 1096.39   37.40
   2  -8  -4  348.57   14.20
  -2  -8   4  352.76   15.20
  -2   8   4  367.76   14.60
   2   8  -4  347.27   15.10
   1  -8  -4  101.99    7.60
  -1  -8   4  106.39    7.70
   1   8  -4  106.19    8.00
  -1   8   4  100.39    7.60
   0  -8  -4  298.37   13.20
   0  -8   4  290.17   13.10
   0   8   4  291.37   13.40
   1  -8   4 3028.20   68.19
  -1  -8  -4 2846.82   72.19
  -1  -8  -4 2889.21   69.79
   1   8   4 2995.50   69.49
  -2  -8  -4  685.33   23.60
  -2  -8  -4  652.53   26.10
   2  -8   4  689.53   21.60
   2   8   4  713.83   23.60
  -3  -8  -4  835.92   27.30
  -3  -8  -4  874.71   26.50
   3  -8   4  884.91   25.00
   3   8   4  813.42   30.50
  -4  -8  -4   17.30    4.60
  -4  -8  -4   11.30    4.00
   4  -8   4   20.90    5.70
   4  -8   4   36.30    5.60
   4   8   4   22.50    5.10
   5  -8   4  161.58   12.90
  -5  -8  -4  189.08   11.60
  -5  -8  -4  172.28   10.30
   5  -8   4  174.38    8.90
   5   8   4  173.58   11.20
  -6  -8  -4   -1.00    2.50
   6  -8   4    2.90    3.50
  -6  -8  -4   -2.90    2.40
   6   8   4    0.70    3.20
   7  -8   4   66.79   10.50
  -7  -8  -4   44.60    6.40
  -7  -8  -4   49.10    6.80
  -7  -8  -4   44.70    7.20
   7   8   4   61.29    8.30
  -8  -8  -4 1154.48   32.40
  -8  -8  -4 1144.29   33.10
   8  -8   4 1188.08   42.20
  -8  -8  -4 1191.88   36.30
   8   8   4 1083.99   35.80
  -9  -8  -4    0.60    3.40
  -9  -8  -4    0.50    3.20
  -9  -8  -4    4.90    4.50
   9  -8   4   -2.70    1.70
   9  -8   4    1.20    4.90
   9   8   4   -1.70    3.90
  10  -8   4   59.29   11.10
 -10  -8  -4   72.69    6.80
  10  -8   4   76.89    5.00
 -10  -8  -4   86.09    9.40
 -10  -8  -4   64.09    6.70
  10   8   4   58.29    9.10
  10   8   4   80.89   10.70
  11  -8   4   86.49   13.40
 -11  -8  -4   90.99    6.50
  11  -8   4   80.99    4.80
 -11  -8  -4   99.89   10.50
  11   8   4   86.19   11.50
  12  -8   4   89.09    4.80
 -12  -8  -4   90.79    3.50
  12  -8   4  118.49   15.70
 -12  -8  -4  106.29   11.20
  12   8   4   87.09   11.80
  13  -8   4   52.69    3.90
  13  -8   4   34.10    9.70
 -13  -8  -4   49.20    8.90
 -14  -8  -4   62.39    9.90
  14  -8   4   59.89    4.00
 -15  -9   4    6.40    3.70
  15  -9  -4    5.60    4.50
  15  -9  -4    2.50    6.70
  15   9  -4    8.00    6.40
  14  -9  -4    6.20    3.90
 -14  -9   4   10.00    4.30
 -13  -9   4  284.47   10.30
 -13  -9   4  301.37   14.90
 -13  -9   4  317.17   15.50
  13  -9  -4  310.27   14.20
  13  -9  -4  314.27   21.20
  13   9  -4  318.77   20.90
 -12  -9   4  214.58    9.50
 -12  -9   4  221.78   13.30
 -12  -9   4  224.08   12.90
  12  -9  -4  206.18   11.40
  12  -9  -4  215.98   17.00
  12   9  -4  193.58   16.20
  11  -9  -4    0.90    4.60
 -11  -9   4    6.40    2.70
  11  -9  -4    3.30    3.30
 -11  -9   4    4.00    4.20
 -11  -9   4    2.40    3.60
  11   9  -4    9.70    6.10
 -10  -9   4   18.60    3.80
  10  -9  -4   26.20    5.10
 -10  -9   4   31.80    6.60
 -10  -9   4   30.50    6.20
  10   9  -4   10.80    5.80
  -9  -9   4  921.51   30.40
  -9  -9   4  903.41   29.90
   9   9  -4  858.21   32.70
  -8  -9   4  381.96   18.10
  -8  -9   4  389.86   17.90
   8   9  -4  426.16   20.70
   7  -9  -4   45.50    6.10
  -7  -9   4   50.29    7.50
  -7  -9   4   43.70    7.00
   7   9  -4   48.30    8.30
  -6  -9   4  360.26   17.20
   6  -9  -4  339.27   14.90
  -6  -9   4  342.47   16.60
   6   9  -4  407.86   19.00
  -5  -9   4  804.52   27.10
  -5  -9   4  837.32   28.00
   5  -9  -4  778.62   25.10
  -5   9   4  801.92   24.00
   5   9  -4  829.62   28.80
  -4  -9   4  417.46   18.30
   4  -9  -4  404.86   18.70
  -4  -9   4  448.56   18.60
   4   9  -4  432.26   18.90
  -4   9   4  435.66   16.40
  -3  -9   4  506.75   20.00
  -3  -9   4  512.25   20.20
  -3   9   4  536.45   19.10
   3   9  -4  517.65   20.40
  -2  -9   4  264.47   13.80
   2  -9  -4  275.37   13.40
  -2  -9   4  279.97   16.60
  -2   9   4  300.37   13.60
   2   9  -4  304.57   14.40
   1  -9  -4  541.55   19.30
  -1  -9   4  516.55   19.70
   1   9  -4  509.85   19.50
  -1   9   4  519.75   19.40
   0  -9   4  611.24   21.70
   0  -9  -4  643.54   21.90
   0   9   4  631.04   22.30
   1  -9   4   52.69    6.60
  -1  -9  -4   52.89    6.80
  -2  -9  -4   24.20    5.10
   2  -9   4   31.00    5.20
  -2  -9  -4   21.60    5.50
   2   9   4   23.40    5.40
   3  -9   4  571.44   19.90
  -3  -9  -4  581.54   21.10
  -3  -9  -4  589.44   22.40
   3   9   4  575.04   22.10
   4  -9   4   13.10    5.40
  -4  -9  -4    4.30    3.30
  -4  -9  -4    5.30    3.70
   4  -9   4    6.80    3.00
   4   9   4    2.80    2.70
   5  -9   4  147.99   12.90
   5  -9   4  163.28    9.10
  -5  -9  -4  164.68   10.60
  -5  -9  -4  160.68   11.20
   5   9   4  157.28   11.20
   6  -9   4  392.16   21.40
  -6  -9  -4  346.77   16.70
  -6  -9  -4  346.07   15.80
   6   9   4  369.86   18.00
   7  -9   4  398.26   14.40
  -7  -9  -4  404.46   18.10
  -7  -9  -4  393.96   16.90
   7  -9   4  393.16   22.10
   7   9   4  387.76   19.10
  -8  -9  -4   18.70    5.30
  -8  -9  -4   19.10    6.10
   8  -9   4   29.10    4.50
   8  -9   4   22.30    7.80
  -8  -9  -4   16.30    4.90
   8   9   4   17.90    6.10
  -9  -9  -4  231.58   14.90
   9  -9   4  241.88   18.50
   9  -9   4  239.18   10.10
  -9  -9  -4  243.58   12.70
   9   9   4  222.78   15.00
  10  -9   4  183.28    8.50
 -10  -9  -4  169.38   13.20
  10  -9   4  181.38   16.70
 -10  -9  -4  170.18   10.30
 -10  -9  -4  151.48   10.30
  10   9   4  178.28   14.20
 -11  -9  -4  119.79   11.60
 -11  -9  -4  115.29    8.10
  11  -9   4  104.69   14.50
  11  -9   4  111.39    6.40
 -12  -9  -4    4.30    4.60
  12  -9   4    3.80    2.30
  12  -9   4    5.10    6.70
 -12  -9  -4    5.80    2.90
 -13  -9  -4   87.59   11.50
  13  -9   4   92.39    5.60
  14  -9   4   33.30    3.80
 -14  -9  -4   21.10    6.90
 -15 -10   4  143.49    9.80
  15 -10  -4  147.19   10.70
  15 -10  -4  113.89   17.10
  15  10  -4  144.49   18.20
  14 -10  -4    6.20    7.10
  14 -10  -4   14.50    4.40
 -14 -10   4    4.80    4.30
 -14 -10   4    1.50    4.10
  14  10  -4    5.50    6.40
  13 -10  -4   39.80   11.10
 -13 -10   4   36.10    4.30
 -13 -10   4   33.90    7.00
  13 -10  -4   33.30    6.10
 -13 -10   4   26.00    6.40
 -12 -10   4   41.30    7.50
 -12 -10   4   36.80    7.10
 -12 -10   4   41.70    5.00
  12 -10  -4   36.50    9.10
  12 -10  -4   47.30    6.90
  12  10  -4   41.30    9.50
 -11 -10   4  705.83   26.50
  11 -10  -4  730.63   24.30
  11 -10  -4  729.23   33.00
 -11 -10   4  751.12   22.40
 -11 -10   4  771.82   27.90
  11  10  -4  753.62   32.00
  10 -10  -4    7.50    4.00
 -10 -10   4    3.10    4.80
 -10 -10   4    4.20    4.50
 -10 -10   4    7.20    3.10
  10  10  -4   11.90    5.90
  -9 -10   4   14.10    5.20
  -9 -10   4   11.70    5.20
   9 -10  -4    7.30    3.70
   9  10  -4   14.10    6.00
  -8 -10   4   15.40    5.40
   8 -10  -4   22.50    5.00
  -8 -10   4   16.70    5.70
   8  10  -4   24.90    6.70
  -7 -10   4  331.27   17.10
  -7 -10   4  332.07   16.90
   7 -10  -4  324.57   14.40
   7  10  -4  340.17   18.70
  -6 -10   4   23.30    5.80
  -6 -10   4   36.50    7.00
   6 -10  -4   32.80    5.50
   6  10  -4   22.60    6.20
  -5 -10   4    7.80    4.40
  -5 -10   4    3.30    3.90
   5 -10  -4    2.30    3.10
   5  10  -4   10.30    4.50
   4 -10  -4  254.17   12.70
  -4 -10   4  220.08   13.60
  -4 -10   4  239.98   13.80
   4  10  -4  246.98   14.70
  -4  10   4  248.88   12.50
   3 -10  -4  610.34   21.50
  -3 -10   4  595.14   22.90
  -3 -10   4  587.34   22.90
  -3  10   4  621.94   21.70
   3  10  -4  603.24   23.40
   2 -10  -4  172.98   10.80
  -2 -10   4  195.78   12.00
  -2 -10   4  198.28   12.20
   2  10  -4  165.48   11.30
  -2  10   4  169.28   10.80
   1 -10  -4  347.97   15.60
  -1 -10   4  336.57   16.00
  -1 -10   4  338.17   16.00
   0 -10   4  226.18   12.90
   0 -10   4  224.48   12.60
   0 -10  -4  217.08   12.30
   0  10   4  207.78   12.20
  -1 -10  -4  780.12   26.10
  -1 -10  -4  772.12   27.40
   1 -10   4  759.82   25.50
   1 -10   4  785.22   26.50
   1  10   4  796.62   27.10
  -2 -10  -4  193.38   12.00
  -2 -10  -4  195.48   12.70
   2 -10   4  199.38   11.50
   2  10   4  211.78   13.00
  -3 -10  -4  275.97   14.50
   3 -10   4  310.17   14.30
  -3 -10  -4  288.77   15.60
   3  10   4  312.57   15.80
  -4 -10  -4   27.20    6.20
   4 -10   4   17.00    4.20
  -4 -10  -4   23.90    5.50
   4  10   4   35.10    6.80
  -5 -10  -4  249.18   13.70
   5 -10   4  220.08   11.80
   5 -10   4  247.28   12.10
   5 -10   4  237.58   16.80
  -5 -10  -4  256.17   14.90
   5  10   4  250.27   14.90
   6 -10   4  114.49   12.90
   6 -10   4  117.49    8.50
   6 -10   4  120.29    8.50
  -6 -10  -4  130.39   10.10
  -6 -10  -4  109.29   10.20
   6  10   4  119.99   10.80
   7 -10   4  170.18   15.50
  -7 -10  -4  173.28   12.40
   7 -10   4  182.18   10.10
  -7 -10  -4  170.88   12.10
   7 -10   4  182.88   10.20
   7  10   4  174.28   13.40
  -8 -10  -4  198.08   13.70
  -8 -10  -4  168.38   12.30
   8 -10   4  159.88    9.30
   8 -10   4  174.18   16.10
  -8 -10  -4  179.68   12.00
   8  10   4  163.88   13.50
  -9 -10  -4  300.67   15.40
   9 -10   4  297.77   21.40
  -9 -10  -4  290.77   17.10
  -9 -10  -4  292.47   15.00
   9 -10   4  284.17   12.20
   9  10   4  296.27   17.90
  10 -10   4   -1.10    2.50
 -10 -10  -4    0.90    3.50
 -10 -10  -4   -4.70    3.70
 -10 -10  -4    4.50    4.00
  10 -10   4    0.50    5.80
 -11 -10  -4   97.79    8.40
  11 -10   4   79.59    6.20
 -11 -10  -4  107.39   11.20
  11 -10   4   95.19   14.70
  12 -10   4   -2.10    2.60
 -12 -10  -4   -3.10    4.40
 -12 -10  -4    0.70    3.40
 -13 -10  -4   30.90    3.80
 -13 -10  -4   36.40    8.20
  13 -10   4   29.80    4.20
 -13 -10  -4   30.20    3.80
  14 -11  -4    7.70    4.40
 -14 -11   4   -1.00    1.70
 -14 -11   4   -9.00    3.50
 -14 -11   4   -6.50    4.50
  14  11  -4    7.10    7.30
 -13 -11   4  312.17   12.60
  13 -11  -4  365.16   24.00
 -13 -11   4  307.37   17.00
  13 -11  -4  326.67   15.70
  13  11  -4  364.16   23.20
  12 -11  -4   45.20    6.80
 -12 -11   4   53.79    8.70
  12 -11  -4   54.39   10.70
 -12 -11   4   51.99    6.00
 -12 -11   4   50.79    8.30
  11 -11  -4    8.80    4.00
 -11 -11   4    7.30    3.50
 -11 -11   4    4.60    5.30
 -11 -11   4    0.10    5.10
  11  11  -4   10.30    6.50
 -10 -11   4   77.49   10.00
 -10 -11   4   70.19    6.90
 -10 -11   4   67.39    9.50
  10 -11  -4   80.19    8.00
  10  11  -4   66.89   11.20
  -9 -11   4  370.76   19.00
   9 -11  -4  355.66   16.20
  -9 -11   4  366.46   18.90
   9  11  -4  372.56   21.30
  -8 -11   4   84.49   10.80
   8 -11  -4   96.89    8.30
  -8 -11   4   94.09   10.20
   8  11  -4  108.49   12.90
  -7 -11   4    1.30    4.00
  -7 -11   4    1.10    3.70
   7 -11  -4    0.00    2.80
   7  11  -4   -1.60    3.80
   6 -11  -4    7.00    3.70
  -6 -11   4   10.70    4.80
  -6 -11   4    2.40    3.90
   6  11  -4   -4.70    3.40
   5 -11  -4   74.49    7.50
  -5 -11   4   78.39    9.70
  -5 -11   4   66.79    9.20
   5  11  -4   73.99    9.90
  -4 -11   4    5.70    4.20
  -4 -11   4    9.30    4.60
   4 -11  -4   10.00    3.80
   4  11  -4   11.20    4.60
   3 -11  -4  269.17   13.80
  -3 -11   4  248.28   14.60
  -3 -11   4  258.77   14.60
   3  11  -4  248.28   14.60
  -3  11   4  285.17   14.70
   2 -11  -4   19.80    5.10
  -2 -11   4   20.60    5.00
  -2 -11   4   17.00    5.40
  -2  11   4   14.90    4.90
  -1 -11   4 1033.20   33.20
  -1 -11   4 1048.30   33.10
   1 -11  -4 1014.20   32.00
  -1  11   4 1032.60   32.80
   0 -11  -4   -0.80    3.20
   0 -11   4    0.00    3.00
   0 -11   4    3.80    3.60
   0 -11  -4   -1.20    2.10
   0  11   4    2.40    2.70
   1 -11   4   48.00    7.40
  -1 -11  -4   66.39    9.00
  -1 -11  -4   52.69    7.50
   1 -11   4   38.90    6.50
   1  11   4   58.19    8.50
  -2 -11  -4    4.30    3.70
   2 -11   4    2.60    3.40
   2 -11   4    0.70    3.10
  -2 -11  -4    2.90    3.90
   2  11   4   -5.20    3.10
   3 -11   4  740.03   25.60
  -3 -11  -4  694.93   27.10
  -3 -11  -4  814.72   27.40
   3 -11   4  721.93   25.10
   3  11   4  787.62   28.60
  -4 -11  -4   20.50    6.20
   4 -11   4   13.10    4.50
  -4 -11  -4   14.20    5.00
   4  11   4   19.90    5.80
  -5 -11  -4  318.47   16.20
   5 -11   4  277.87   14.50
  -5 -11  -4  295.37   17.10
   5 -11   4  283.07   19.10
   5  11   4  315.27   17.60
   6 -11   4    3.80    3.60
  -6 -11  -4   -0.20    4.10
   6 -11   4    4.80    3.70
   6 -11   4   -7.50    3.90
  -6 -11  -4   -1.60    3.70
   6  11   4   -0.10    3.90
  -7 -11  -4  968.60   33.10
   7 -11   4  942.41   29.30
  -7 -11  -4  988.50   32.20
   7 -11   4  954.80   28.60
   7 -11   4  921.51   38.60
   7  11   4  963.80   35.10
   8 -11   4    2.10    3.20
   8 -11   4    4.90    5.30
  -8 -11  -4   -4.10    3.80
  -8 -11  -4    7.10    4.70
   8 -11   4   -1.10    3.30
   8  11   4    0.50    4.40
  -9 -11  -4  312.67   16.10
   9 -11   4  288.47   13.20
  -9 -11  -4  276.77   15.60
   9 -11   4  268.27   21.40
  -9 -11  -4  298.17   17.50
 -10 -11  -4    4.70    4.20
 -10 -11  -4    3.90    4.80
 -10 -11  -4   -1.90    4.10
  10 -11   4   15.70    8.60
  10 -11   4    4.90    3.50
 -11 -11  -4   30.90    6.40
  11 -11   4   35.80    5.20
 -11 -11  -4   32.60    7.90
 -11 -11  -4   42.10    6.70
  12 -11   4    4.30    3.00
 -12 -11  -4   17.50    4.70
 -12 -11  -4   10.70    5.70
 -12 -11  -4   -2.50    4.30
 -13 -11  -4   88.69    7.40
 -13 -11  -4   75.29   11.20
  13 -11   4   89.39    6.90
 -14 -12   4    0.90    5.30
 -14 -12   4    5.70    2.40
  14 -12  -4    5.40    4.50
 -14 -12   4   -1.30    4.70
  14  12  -4    1.30    6.10
  13 -12  -4   -0.90    4.10
 -13 -12   4    6.40    3.20
 -13 -12   4    3.00    6.00
 -13 -12   4    3.40    5.00
  13  12  -4   20.80    9.10
 -12 -12   4    0.50    2.90
 -12 -12   4    1.50    4.10
  12 -12  -4    4.10    4.00
 -12 -12   4    3.50    5.40
  12 -12  -4    1.20    5.40
  12  12  -4    1.60    6.30
 -11 -12   4  305.27   18.30
  11 -12  -4  324.77   15.70
 -11 -12   4  311.67   14.20
 -11 -12   4  313.37   18.40
 -10 -12   4   18.70    6.60
  10 -12  -4   33.10    6.20
 -10 -12   4   31.70    7.50
  10  12  -4   21.20    7.90
  -9 -12   4    4.40    4.90
  -9 -12   4    9.40    5.30
   9 -12  -4   11.20    4.70
   9  12  -4    2.10    5.30
  -8 -12   4    5.00    4.70
  -8 -12   4   -2.40    4.30
   8 -12  -4    2.20    3.50
   8  12  -4    6.60    5.40
  -7 -12   4  390.56   19.90
  -7 -12   4  348.77   19.10
   7 -12  -4  360.86   16.80
   7  12  -4  374.96   21.10
   6 -12  -4    4.80    3.80
  -6 -12   4   -0.60    4.30
  -6 -12   4   -1.70    3.90
   6  12  -4    5.70    5.30
  -5 -12   4  326.07   18.00
   5 -12  -4  325.37   15.90
  -5 -12   4  330.97   18.20
   5  12  -4  331.67   19.00
  -4 -12   4    0.10    3.80
  -4 -12   4    1.60    4.30
   4 -12  -4    3.30    3.70
   4  12  -4   -1.60    3.90
  -3 -12   4  454.75   21.10
   3 -12  -4  492.05   20.10
  -3 -12   4  463.25   21.30
  -2 -12   4    4.20    4.20
   2 -12  -4    0.20    3.20
  -2 -12   4   -0.20    3.70
  -2  12   4    4.80    3.90
   1 -12  -4  506.45   21.00
  -1 -12   4  486.55   21.40
  -1 -12   4  496.35   21.70
  -1  12   4  496.85   21.50
   0 -12   4  163.28   12.00
   0 -12  -4  139.49   11.50
   0 -12   4  142.69   10.80
   0 -12  -4  137.09   10.50
   0  12   4  168.38   12.40
  -1 -12  -4  911.51   31.80
  -1 -12  -4  854.31   29.50
   1 -12   4  891.91   29.80
   1 -12   4  811.02   29.20
   1  12   4  823.22   30.50
   2 -12   4   73.69    9.30
  -2 -12  -4   66.19    9.00
   2 -12   4   65.59    8.60
  -2 -12  -4   68.99    9.60
   2  12   4   66.79    9.40
  -3 -12  -4  251.87   15.80
   3 -12   4  222.08   13.30
   3 -12   4  235.48   13.70
  -3 -12  -4  225.28   14.20
   3  12   4  244.68   15.60
   4 -12   4  138.99   10.20
   4 -12   4  131.49   10.50
  -4 -12  -4  121.79   11.50
  -4 -12  -4  106.59   10.40
   4  12   4  108.69   11.00
  -5 -12  -4  137.79   12.30
   5 -12   4  142.69   14.30
  -5 -12  -4  150.78   11.90
   5 -12   4  157.98   11.00
   5 -12   4  129.29   10.40
   5  12   4  149.69   12.90
  -6 -12  -4   -5.30    3.80
   6 -12   4   -2.00    3.10
   6 -12   4    1.50    4.00
  -6 -12  -4    0.80    4.00
   6 -12   4    0.70    3.40
   6  12   4   -7.50    4.60
   7 -12   4  456.35   18.40
  -7 -12  -4  429.66   21.60
   7 -12   4  389.76   24.90
  -7 -12  -4  478.95   21.10
   7 -12   4  436.96   18.80
   7  12   4  461.05   27.40
  -8 -12  -4    3.50    4.60
  -8 -12  -4    0.20    4.50
   8 -12   4    3.10    3.60
   8 -12   4   -3.40    3.30
   8 -12   4   13.90    6.40
   9 -12   4   99.99   15.50
  -9 -12  -4  100.19   11.80
   9 -12   4   88.59    8.70
  -9 -12  -4   92.89   11.70
  -9 -12  -4   98.19   10.50
   9 -12   4   92.49    8.30
 -10 -12  -4   28.40    7.40
  10 -12   4   27.20    5.70
 -10 -12  -4   21.40    6.30
  10 -12   4   17.80    4.80
 -10 -12  -4   32.80    7.80
 -11 -12  -4  112.59   11.20
  11 -12   4  119.39   10.10
 -11 -12  -4  106.59   12.80
 -11 -12  -4   93.29    9.50
  11 -12   4   89.79    8.70
 -12 -12  -4   25.70    7.80
 -12 -12  -4   32.10    6.80
  12 -12   4   31.40    5.80
 -12 -12  -4   39.70    6.80
 -13 -13   4  173.58   17.70
 -13 -13   4  192.98   14.80
  13 -13  -4  179.58   12.40
 -13 -13   4  162.78   10.20
  13  13  -4  202.98   18.80
 -12 -13   4   11.60    5.70
  12 -13  -4   -2.80    3.80
 -12 -13   4   -7.20    6.00
  12  13  -4    3.10    6.10
 -11 -13   4   30.40    7.80
 -11 -13   4   21.70    7.00
 -11 -13   4   13.40    4.50
  11 -13  -4   12.90    5.10
  11  13  -4   18.00    7.70
  10 -13  -4    8.30    4.70
 -10 -13   4    4.90    6.50
 -10 -13   4    7.30    5.70
  10  13  -4    7.80    6.40
   9 -13  -4  362.16   17.70
  -9 -13   4  394.86   20.90
   9  13  -4  363.16   22.60
  -8 -13   4    2.30    5.30
  -8 -13   4   -5.70    4.40
   8 -13  -4    2.60    4.20
   8  13  -4    5.90    5.90
  -7 -13   4   33.90    7.90
   7 -13  -4   40.10    7.00
  -7 -13   4   27.00    7.10
   7  13  -4   37.80    9.10
   6 -13  -4    5.70    4.50
  -6 -13   4    7.70    6.00
  -6 -13   4    4.00    5.20
   6  13  -4   12.20    6.80
  -5 -13   4 1159.78   38.50
   5 -13  -4 1078.79   34.90
  -5 -13   4 1125.59   38.30
   5  13  -4 1101.19   39.30
  -4 -13   4    1.00    4.30
   4 -13  -4    8.30    5.30
  -4 -13   4    1.00    5.00
   3 -13  -4   58.29    8.40
  -3 -13   4   83.69   10.90
  -3 -13   4   59.09    9.10
  -2 -13   4    4.40    3.80
   2 -13  -4    4.70    3.90
  -2 -13   4   -4.80    3.40
   1 -13  -4  407.96   19.40
   1 -13  -4  428.46   21.10
  -1 -13   4  426.66   20.80
  -1 -13   4  419.56   20.10
  -1  13   4  413.76   20.00
   0 -13  -4   69.29    9.80
   0 -13  -4   77.19   10.10
   0 -13   4   85.89   10.90
   0 -13   4   76.59    9.70
   0  13   4   82.79   10.60
   1 -13   4  239.18   14.80
  -1 -13  -4  227.88   15.70
  -1 -13  -4  255.47   15.30
   1 -13   4  253.47   15.50
   1  13   4  232.08   15.60
   2 -13   4  300.97   16.70
  -2 -13  -4  310.47   18.20
   2 -13   4  307.47   16.50
  -2 -13  -4  295.67   16.80
   2  13   4  294.57   17.80
   3 -13   4  228.68   14.70
  -3 -13  -4  254.97   15.70
   3 -13   4  232.28   14.10
  -3 -13  -4  269.07   17.10
   3  13   4  227.68   15.90
   4 -13   4   34.30    6.80
  -4 -13  -4   33.80    7.40
   4 -13   4   23.30    5.90
  -4 -13  -4   25.50    6.90
  -5 -13  -4  170.78   14.00
  -5 -13  -4  192.08   13.60
   5 -13   4  165.68   11.60
   5 -13   4  191.48   12.90
   6 -13   4   40.10    6.80
   6 -13   4   36.80    6.90
  -6 -13  -4   33.70    7.80
  -6 -13  -4   52.29    8.60
   6  13   4   48.30    8.90
   7 -13   4  232.48   14.10
  -7 -13  -4  216.98   16.40
   7 -13   4  226.28   13.30
  -7 -13  -4  211.78   15.40
   7 -13   4  179.18   16.90
   8 -13   4  -10.90    4.40
  -8 -13  -4    3.50    5.80
   8 -13   4   -2.30    3.20
  -8 -13  -4    4.30    4.30
   8 -13   4    7.70    4.20
  -9 -13  -4  139.49   13.00
   9 -13   4  136.89   10.20
   9 -13   4  118.79   10.50
  -9 -13  -4  147.19   12.30
  -9 -13  -4  137.79   13.00
 -10 -13  -4    1.60    4.50
  10 -13   4   -3.80    3.00
 -10 -13  -4   -5.90    4.30
 -10 -13  -4    8.20    5.90
  10 -13   4   -0.90    4.30
  11 -13   4   14.20    5.50
 -11 -13  -4    5.00    5.00
 -11 -13  -4    7.00    5.90
 -11 -13  -4    9.80    6.40
  11 -13   4   17.80    5.00
  12 -13   4   15.10    4.40
 -12 -13  -4   22.00    7.40
 -12 -13  -4   14.20    6.60
  12 -13   4    0.20    4.30
 -12 -13  -4   16.20    5.60
 -12 -14   4   18.30    5.20
  12 -14  -4   20.70    5.90
 -12 -14   4   10.30    7.30
 -12 -14   4   24.10    8.60
  12  14  -4   35.00   10.30
 -11 -14   4  196.18   12.60
  11 -14  -4  231.58   14.40
 -11 -14   4  218.08   17.40
  11  14  -4  221.38   19.50
 -10 -14   4   -0.90    5.60
  10 -14  -4    3.00    4.40
  10  14  -4   -6.60    5.60
   9 -14  -4   16.20    5.50
  -9 -14   4   25.70    7.90
   9  14  -4   22.20    8.30
   8 -14  -4    4.00    4.00
  -8 -14   4    0.30    5.00
   7 -14  -4  406.76   19.40
  -7 -14   4  407.56   21.90
  -7 -14   4  418.86   26.60
   7  14  -4  408.26   23.80
  -6 -14   4   -1.20    4.40
  -6 -14   4   -0.90    5.80
   6 -14  -4    1.70    3.90
   6  14  -4    0.60    5.30
  -5 -14   4   18.80    6.70
   5 -14  -4   26.40    6.80
  -5 -14   4   15.10    7.10
   4 -14  -4   39.90    7.90
  -4 -14   4   43.50    8.70
   3 -14  -4  554.34   23.50
  -3 -14   4  539.55   24.50
   2 -14  -4   67.49    9.30
   2 -14  -4   65.79   10.40
  -2 -14   4   62.09   10.10
  -2 -14   4   51.99    9.00
   1 -14  -4  231.38   16.30
   1 -14  -4  229.48   14.90
  -1 -14   4  227.78   15.60
  -1 -14   4  213.18   15.10
   0 -14  -4    5.60    4.40
   0 -14  -4   -2.20    4.20
   0 -14   4   10.10    5.30
   0 -14   4    4.30    4.50
  -1 -14  -4  379.16   19.10
   1 -14   4  383.26   19.40
  -1 -14  -4  348.87   23.70
   1 -14   4  375.66   19.80
  -2 -14  -4    8.40    6.00
  -2 -14  -4    6.10    5.10
   2 -14   4    6.30    4.80
   2 -14   4    8.60    5.00
   2  14   4    9.10    5.50
   3 -14   4  272.97   16.40
  -3 -14  -4  292.27   17.50
  -3 -14  -4  295.07   18.10
   3 -14   4  279.27   16.10
   3  14   4  260.27   18.60
  -4 -14  -4    1.70    3.60
  -4 -14  -4   -4.60    3.80
   4 -14   4    3.90    4.50
   4 -14   4    3.30    4.10
   5 -14   4  179.08   13.30
  -5 -14  -4  196.88   14.60
   5 -14   4  237.48   14.20
  -5 -14  -4  193.38   15.80
  -6 -14  -4   -4.40    3.60
   6 -14   4   -3.10    4.10
   6 -14   4    0.00    4.10
   7 -14   4   71.49    9.80
   7 -14   4  104.39    9.90
  -7 -14  -4  126.39   12.70
  -8 -14  -4   -7.40    4.10
   8 -14   4   -0.60    3.70
   8 -14   4    1.40    3.50
  -8 -14  -4    4.00    4.60
   9 -14   4   37.50    7.40
   9 -14   4   32.80    6.50
  -9 -14  -4   40.80    8.60
  -9 -14  -4   33.60    8.20
  10 -14   4    5.90    4.20
 -10 -14  -4    1.30    5.50
 -10 -14  -4    5.10    6.40
 -10 -14  -4    6.80    5.10
  10 -14   4    2.60    4.40
  11 -14   4  120.19   10.20
 -11 -14  -4  101.09   11.70
  11 -14   4  129.89   11.20
 -11 -14  -4  136.89   14.30
 -12 -15   4   -7.00    4.40
  12  15  -4    6.30    6.60
 -11 -15   4  -10.70    4.30
  11 -15  -4    5.20    5.10
  11  15  -4   -5.90    3.60
  10 -15  -4   36.70    7.30
 -10 -15   4   33.20    8.60
  10  15  -4   16.70    7.90
   9 -15  -4  341.07   18.10
  -9 -15   4  337.17   21.50
   9  15  -4  312.77   22.40
  -8 -15   4   37.00    9.00
   8 -15  -4   53.09    8.40
   8  15  -4   37.00    9.60
   7 -15  -4   -0.30    4.10
  -7 -15   4    2.00    6.00
  -6 -15   4   -2.10    4.30
   6 -15  -4    3.50    4.10
  -5 -15   4  462.05   23.60
   5 -15  -4  415.16   21.00
   4 -15  -4   17.60    6.30
  -4 -15   4    6.40    5.60
   3 -15  -4   69.99   11.50
   3 -15  -4   62.09    9.50
  -3 -15   4   55.29    9.50
   2 -15  -4    6.70    5.00
  -2 -15   4   14.60    6.50
   2 -15  -4    6.50    5.50
   1 -15  -4  420.66   22.90
   1 -15  -4  388.86   20.50
  -1 -15   4  400.56   21.10
  -1 -15   4  396.46   21.30
   0 -15   4   30.10    7.40
   0 -15   4   23.50    7.20
   0 -15  -4   28.70    7.60
   1 -15   4   97.19   12.20
  -1 -15  -4   76.29   10.70
   1 -15   4   75.09   10.50
  -2 -15  -4   13.90    5.60
   2 -15   4   11.20    5.70
   2 -15   4    4.70    5.10
   3 -15   4  437.46   21.00
   3 -15   4  390.26   20.90
  -3 -15  -4  405.86   21.30
  -3 -15  -4  394.56   26.70
   4 -15   4    1.50    4.30
   4 -15   4    5.90    5.80
  -4 -15  -4    4.70    5.00
   5 -15   4   58.69    9.30
   5 -15   4   66.49    9.50
  -5 -15  -4   53.39    9.50
   6 -15   4    3.90    4.30
   6 -15   4   11.10    5.80
  -6 -15  -4    2.00    4.90
   7 -15   4  128.69   12.00
  -7 -15  -4  103.99   12.90
   7 -15   4   96.89   10.40
  -8 -15  -4    6.10    8.60
   8 -15   4    0.60    3.90
   8 -15   4    1.90    4.20
   9 -15   4  106.49   11.90
  -9 -15  -4   96.59   16.00
   9 -15   4  137.09   11.20
  10 -15   4    1.30    4.10
 -10 -15  -4   -2.30    7.80
 -10 -15  -4   16.40    6.80
  10 -15   4    0.20    4.80
  11 -16  -4  102.49   12.00
 -11 -16   4   75.19   12.10
  11  16  -4   72.79   14.00
  10 -16  -4   -5.20    3.90
 -10 -16   4    2.70    5.90
  10  16  -4   11.90    7.40
   9 -16  -4   -1.70    3.90
  -9 -16   4   -0.20    5.50
   8 -16  -4   51.49    9.00
  -8 -16   4   38.90    9.60
  -7 -16   4  201.18   16.30
   7 -16  -4  172.28   13.70
  -6 -16   4   12.10    6.50
   6 -16  -4    6.60    5.10
  -5 -16   4  -10.10    5.30
   5 -16  -4    9.50    5.60
   4 -16  -4   75.29   10.40
  -4 -16   4   62.79   10.60
   4 -16  -4   79.79   12.30
  -3 -16   4  178.38   15.10
   3 -16  -4  168.38   14.10
   3 -16  -4  174.38   15.70
   2 -16  -4    4.20    4.20
  -2 -16   4    8.10    5.50
  -2 -16   4    0.50    2.80
   2 -16  -4   -3.40    4.50
   1 -16  -4   21.70    7.70
   1 -16  -4   30.90    7.90
  -1 -16   4   41.30    8.40
  -1 -16   4   20.90    7.80
   0 -16   4   78.39   12.30
   0 -16  -4   86.69   11.80
   0 -16   4   84.69   12.00
   1 -16   4  612.94   27.80
   1 -16   4  557.74   26.10
  -1 -16  -4  563.64   26.30
  -2 -16  -4   26.80    8.00
   2 -16   4   17.30    6.10
  -3 -16  -4   92.89   12.50
  -3 -16  -4   55.49   12.20
   3 -16   4   86.89   11.50
  -4 -16  -4    5.60    6.40
   4 -16   4   22.20    8.20
   4 -16   4   10.70    6.30
  -5 -16  -4  201.18   20.70
   5 -16   4  192.18   14.30
   5 -16   4  193.18   16.00
   6 -16   4   10.50    6.20
  -6 -16  -4    4.90    5.90
   6 -16   4   12.90    6.60
  -7 -16  -4  136.79   13.90
   7 -16   4  168.18   13.60
   7 -16   4  141.29   13.80
   8 -16   4    4.30    5.10
   8 -16   4    5.20    4.40
  -8 -16  -4    0.10    4.90
   9 -16   4   22.30    8.10
   9 -16   4   41.80    8.30
  -9 -16  -4   26.80    7.60
 -10 -17   4   43.80   10.60
  10 -17  -4   67.09   12.40
  -9 -17   4  306.67   21.50
  -8 -17   4   12.50    7.30
   7 -17  -4    3.20    5.40
  -7 -17   4    3.50    6.00
  -6 -17   4    3.90    5.70
   6 -17  -4    0.50    4.40
   5 -17  -4  206.48   15.70
   5 -17  -4  218.58   17.70
  -5 -17   4  196.58   16.70
  -4 -17   4   36.00    9.10
   4 -17  -4   40.10    9.00
   4 -17  -4   31.80    9.10
   3 -17  -4    3.90    5.90
   3 -17  -4   -2.80    6.00
  -3 -17   4    0.90    5.40
   2 -17  -4   27.00   10.00
  -1 -17   4  119.29   17.10
   0 -17   4   -3.30    5.20
   0 -17   4   -2.80    4.40
   1 -17   4   84.79   12.40
  -1 -17  -4   54.89   10.40
   1 -17   4   57.19    9.70
   2 -17   4   27.30    8.10
   2 -17   4   27.60    8.30
  -2 -17  -4   26.10    7.90
   3 -17   4  149.59   14.00
   3 -17   4  149.69   13.50
  -3 -17  -4  139.19   13.80
   4 -17   4    2.60    4.90
   4 -17   4    4.10    5.50
  -4 -17  -4   -1.40    4.70
   5 -17   4   98.89   12.80
  -5 -17  -4   93.09   12.90
   5 -17   4   85.19   11.80
   6 -17   4    3.60    5.80
   6 -17   4   -1.90    5.40
  -6 -17  -4   16.80    7.40
   7 -17   4   72.89   10.80
  -7 -17  -4   50.69   10.20
   7 -17   4   53.59   10.30
   8 -17   4   19.70    7.60
   8 -17   4   21.20    6.20
  -8 -17  -4   11.20    6.70
  -8 -18   4   26.30    9.70
   8 -18  -4   52.99   10.20
   7 -18  -4  270.37   18.90
  -7 -18   4  316.77   21.50
  -6 -18   4   46.00   10.30
   6 -18  -4   55.59   10.00
  -5 -18   4    7.20    7.20
   5 -18  -4    3.10    4.80
  -4 -18   4   17.70    7.90
   4 -18  -4   32.50    8.50
  -3 -18   4  200.18   17.00
   3 -18  -4  209.98   16.50
   2 -18  -4   -0.60    5.20
  -2 -18   4   10.10    6.30
   1 -18  -4    2.90    5.30
  -1 -18   4   21.80    7.50
   0 -18  -4   12.80    6.70
   0 -18   4    7.90    6.20
   1 -18   4  130.39   15.30
  -1 -18  -4   98.59   13.30
   2 -18   4   -0.20    4.90
  -2 -18  -4    1.40    5.30
  -3 -18  -4   26.40    8.10
  -4 -18  -4   24.90    8.00
  -5 -18  -4   34.70    8.70
  -6 -18  -4   -6.00    5.20
  -7 -18  -4   75.89   12.50
  -7 -19   4    0.70    6.00
   7 -19  -4   -6.50    4.90
  -6 -19   4    3.80    6.70
   6 -19  -4   21.20    7.80
   5 -19  -4  141.89   14.20
  -5 -19   4  127.39   16.00
   4 -19  -4    7.50    6.00
  -4 -19   4   18.20    6.80
  -3 -19   4   -5.70    5.30
   3 -19  -4    5.70    5.80
  -2 -19   4   15.70    8.00
   2 -19  -4   32.80    9.00
  -1 -19   4  192.38   17.40
   1 -19  -4  178.28   16.20
   0 -19  -4   14.10    7.00
   0 -19   4    5.40    6.50
  -1 -19  -4   35.90    9.20
   1 -19   4   30.80    9.00
   2 -19   4    9.70    7.10
  -2 -19  -4   19.90    7.30
   3 -19   4   61.59   11.20
  -3 -19  -4   65.99   11.60
  -4 -19  -4   21.10    8.10
   4 -19   4   17.80    7.60
   5 -19   4   86.19   12.80
  -5 -19  -4   51.59   10.60
   4 -20  -4    3.10    5.60
  -4 -20   4    6.70    6.70
   3 -20  -4  132.39   14.00
  -3 -20   4  119.99   15.30
  -2 -20   4    3.50    6.30
   2 -20  -4   -5.50    5.00
   1 -20  -4   14.20    6.70
  -1 -20   4    6.20    5.40
   0 -20  -4   71.59   11.90
   0 -20   4   89.49   13.80
   1 -20   4  106.69   14.50
  -1 -20  -4  117.69   15.30
  -2 -20  -4    1.20    6.00
   2 -20   4    6.20    6.40
   3 -20   4    2.40    6.00
  -3 -20  -4    0.60    5.30
  17   0  -5    1.30    5.80
  16   0  -5   -0.60    4.20
  15   0  -5  342.67   17.70
  14   0  -5    1.70    2.40
  14   0  -5    1.30    3.60
  13   0  -5   31.80    4.70
  13   0  -5   34.00    6.20
  12   0  -5    4.00    3.70
  12   0  -5   -0.10    2.10
  11   0  -5  514.35   16.50
  11   0  -5  514.55   19.00
 -10   0   5   -0.20    0.80
  10   0  -5    1.30    2.70
  10   0  -5   -1.50    1.50
   9   0  -5  175.48    9.60
  -9   0   5  179.38    6.90
  -9   0   5  182.08    6.80
   9   0  -5  172.28    7.70
   8   0  -5    1.00    2.00
   8   0  -5    0.60    1.30
  -8   0   5    1.50    1.60
   7   0  -5 1157.28   27.50
  -7   0   5 1247.98   28.80
   7   0  -5 1155.78   30.60
  -6   0   5   -2.50    1.30
   6   0  -5    0.10    1.70
  -5   0   5    6.00    1.90
   5   0  -5    3.40    1.80
   4   0  -5    0.90    1.50
  -4   0   5    1.20    1.30
  -3   0   5 1813.82   41.10
   3   0  -5 1846.72   41.60
   2   0  -5    1.80    1.30
  -2   0   5   -0.90    1.60
   2   0  -5    1.70    1.50
  -1   0   5  562.64   14.90
   1   0  -5  545.05   14.90
   1   0  -5  528.35   15.00
   0   0  -5   -0.50    1.90
   0   0   5   -1.00    1.70
   0   0  -5    0.10    1.50
   0   0   5   -0.40    1.40
  -1   0  -5   64.99    3.60
  -1   0  -5   63.99    5.10
   1   0   5   57.89    4.90
   1   0   5   66.49    3.80
  -2   0  -5    2.50    2.00
   2   0   5    0.90    1.60
   2   0   5   -0.90    1.00
  -2   0  -5    1.00    0.90
  -3   0  -5 1464.65   37.50
   3   0   5 1455.25   37.30
   3   0   5 1449.76   31.90
  -4   0  -5   -1.80    2.00
   4   0   5    2.40    1.20
   4   0   5   -4.80    1.40
   5   0   5  671.13   16.90
   5   0   5  702.93   16.50
  -5   0  -5  658.53   22.80
   5   0   5  700.23   23.20
   6   0   5    2.00    1.30
  -6   0  -5   -3.10    2.10
   6   0   5   -4.40    2.10
   6   0   5    0.70    1.30
  -7   0  -5  188.98   12.10
   7   0   5  194.68    6.80
   7   0   5  206.88   12.50
   7   0   5  185.98    7.20
   8   0   5   -0.50    1.40
  -8   0  -5   -1.30    2.90
   8   0   5    0.30    1.40
   8   0   5   -5.00    2.10
   9   0   5   21.40    3.10
  -9   0  -5   30.30    6.70
   9   0   5   28.20    3.80
   9   0   5   19.30    5.70
  10   0   5    3.10    2.20
  10   0   5    2.70    1.90
 -10   0  -5   -0.40    3.30
  10   0   5   -3.90    3.10
  11   0   5 1085.99   37.50
  11   0   5 1076.29   28.80
 -11   0  -5 1099.59   37.70
  12   0   5   -1.30    2.60
  12   0   5   -0.30    2.40
  12   0   5   -2.00    3.90
 -12   0  -5   -1.20    4.10
  13   0   5    4.40    3.60
  13   0   5   14.60    5.90
  14   0   5    1.40    3.30
  14   0   5   10.40    5.90
  17  -1  -5  198.48   14.20
  17   1  -5  235.68   16.10
  16  -1  -5    3.00    3.40
  16  -1  -5    3.60    4.40
  16   1  -5    9.00    5.40
  15  -1  -5   24.90    4.70
  15  -1  -5   27.20    6.10
  15   1  -5   28.90    6.80
  14  -1  -5    6.70    4.50
  14  -1  -5   -3.00    2.40
  14   1  -5   -7.00    3.10
  13  -1  -5  265.97   12.50
  13  -1  -5  277.37   13.90
  13   1  -5  243.08   14.00
  12  -1  -5    3.20    2.90
  12   1  -5    1.90    3.30
  11  -1  -5  134.29    9.00
  11  -1  -5  130.09    8.20
  11   1  -5  122.89   10.80
  11   1  -5  125.29    6.40
 -10  -1   5   34.40    3.30
  10  -1  -5   37.60    4.90
 -10  -1   5   40.20    3.40
  10  -1  -5   31.30    5.10
  10   1  -5   36.60    3.40
  10   1  -5   30.90    5.50
   9  -1  -5  544.55   17.80
   9  -1  -5  506.95   16.70
  -9  -1   5  520.05   15.50
  -9  -1   5  556.14   15.30
  -9   1   5  521.25   12.80
   9   1  -5  540.55   18.80
  -9   1   5  533.75   12.80
   9   1  -5  505.55   14.10
   8  -1  -5   77.69    5.90
   8  -1  -5   69.89    5.30
  -8  -1   5   70.29    4.80
   8   1  -5   78.29    6.50
   8   1  -5   77.39    3.80
  -8   1   5   77.89    4.30
   7  -1  -5  545.65   16.80
  -7  -1   5  531.35   15.70
   7  -1  -5  516.65   15.70
  -7   1   5  559.14   15.10
   7   1  -5  520.75   14.60
   7   1  -5  560.24   17.90
  -6  -1   5   61.49    4.60
   6  -1  -5   58.49    4.60
   6   1  -5   51.59    4.90
   6   1  -5   57.09    2.20
  -6   1   5   61.19    4.20
  -5  -1   5  467.75   14.20
   5  -1  -5  470.85   14.40
   5   1  -5  451.45   14.80
  -5   1   5  462.65   13.50
  -4  -1   5    7.10    1.90
   4  -1  -5    3.70    1.70
  -4   1   5    4.20    1.60
   4   1  -5    2.10    1.70
   4   1  -5    4.70    0.80
  -3  -1   5   61.09    4.20
   3  -1  -5   71.59    4.50
  -3   1   5   73.99    4.50
   3   1  -5   62.29    4.30
   3   1  -5   62.59    3.10
  -2  -1   5  287.47    9.90
   2  -1  -5  298.17   10.00
  -2  -1   5  298.07    8.80
  -2   1   5  293.57    9.80
   2   1  -5  303.07   10.20
  -1  -1   5  402.26   11.90
  -1  -1   5  393.26   11.90
   1  -1  -5  407.36   12.10
   1   1  -5  394.56   12.10
  -1   1   5  403.56   12.00
   1   1  -5  412.56   12.00
   0  -1  -5 2351.76   52.79
   0  -1   5 2412.96   51.09
   0   1   5 2334.67   51.29
   0   1  -5 2408.76   53.19
  -1  -1  -5   55.09    3.60
  -1  -1  -5   47.00    4.60
   1  -1   5   52.19    4.80
   1  -1   5   55.99    3.20
   1   1   5   48.80    3.50
  -1   1  -5   47.20    2.90
  -1   1  -5   51.79    4.90
  -2  -1  -5   32.90    4.10
   2  -1   5   32.40    2.50
   2  -1   5   34.00    4.30
  -2  -1  -5   39.00    2.80
   2   1   5   29.70    2.80
  -2   1  -5   35.70    1.70
   2   1   5   36.80    4.50
  -2   1  -5   34.10    4.90
  -3  -1  -5    7.20    2.90
   3  -1   5    4.60    2.70
  -3  -1  -5    5.70    1.20
  -3  -1  -5    7.10    1.40
   3  -1   5    5.60    1.30
   3   1   5    4.60    2.50
   3   1   5    7.70    1.70
  -3   1  -5    7.00    2.70
   4  -1   5    4.70    2.90
  -4  -1  -5    8.20    3.20
  -4   1  -5    1.10    2.20
   4   1   5   -0.90    2.20
   5  -1   5 1526.65   32.70
   5  -1   5 1524.05   42.00
  -5  -1  -5 1592.84   41.50
   5  -1   5 1550.74   32.90
   5   1   5 1528.15   35.70
   5   1   5 1582.74   35.00
  -5   1  -5 1584.54   42.20
   5   1   5 1575.54   41.30
   6  -1   5    4.40    3.10
  -6  -1  -5    2.50    3.10
   6  -1   5    3.60    1.10
   6  -1   5    4.30    1.10
   6   1   5    4.60    3.10
   6   1   5    2.00    1.80
   6   1   5    3.50    1.80
  -6   1  -5    3.50    3.20
   7  -1   5    2.10    3.10
  -7  -1  -5    2.00    3.60
   7  -1   5   -1.20    0.80
   7  -1   5    0.40    1.00
   7   1   5    2.00    1.60
   7   1   5   -1.10    2.60
  -7   1  -5    1.10    3.00
   7   1   5    1.50    1.80
   8  -1   5    5.50    3.80
  -8  -1  -5    2.30    3.60
   8  -1   5    3.90    1.30
   8  -1   5    4.70    1.50
   8   1   5    5.10    2.30
   8   1   5    2.90    2.10
  -8   1  -5    3.30    3.70
   8   1   5    5.90    3.60
   9  -1   5 1212.28   39.00
  -9  -1  -5 1194.08   38.00
   9  -1   5 1212.58   28.40
   9  -1   5 1239.18   27.70
   9   1   5 1221.88   30.30
   9   1   5 1185.08   38.90
   9   1   5 1244.98   31.40
  -9   1  -5 1252.47   39.30
 -10  -1  -5  156.48   12.40
  10  -1   5  134.59    6.50
  10  -1   5  139.19   12.00
  10  -1   5  126.99    5.80
  10   1   5  125.79   11.50
 -10   1  -5  131.99   12.10
  10   1   5  128.49    7.30
  10   1   5  127.39    7.80
  11  -1   5   71.29    4.90
  11  -1   5   53.59    4.90
 -11  -1  -5   48.50    8.50
  11  -1   5   67.69    9.90
  11   1   5   56.29    5.80
 -11   1  -5   53.59    9.20
  11   1   5   59.39    6.40
  11   1   5   79.19   10.30
  12  -1   5   48.20    4.80
  12  -1   5   31.80    7.60
  12  -1   5   40.60    4.80
 -12  -1  -5   50.89    9.00
  12   1   5   43.80    6.20
  12   1   5   60.29    9.30
  12   1   5   36.60    5.50
 -13  -1  -5  424.66   22.20
  13  -1   5  379.16   14.30
  13  -1   5  428.06   23.10
  13   1   5  367.86   16.20
  14  -1   5    1.00    5.60
  14  -1   5    1.60    3.00
  14   1   5    5.50    4.60
  15  -1   5   85.19   14.30
  15  -1   5   91.59    8.00
  15   1   5   81.89    9.70
  17  -2  -5    1.00    4.40
  17   2  -5    7.40    5.70
  16  -2  -5   22.80    6.30
  16  -2  -5   15.40    4.70
  16   2  -5   31.60    8.10
  15  -2  -5  438.46   18.70
  15  -2  -5  477.85   20.00
  15   2  -5  480.55   22.40
  14  -2  -5   16.20    4.90
  14  -2  -5   18.80    4.90
  14   2  -5   24.40    6.30
  13  -2  -5   30.00    5.50
  13  -2  -5   40.10    6.30
  13   2  -5   34.50    6.80
  12  -2  -5   13.30    4.00
  12  -2  -5   10.60    3.70
  12   2  -5   17.90    5.00
  11  -2  -5  789.02   26.10
 -11  -2   5  750.12   18.90
 -11  -2   5  742.23   19.00
  11  -2  -5  755.42   23.40
  11   2  -5  736.23   25.70
  10  -2  -5   -0.20    2.00
 -10  -2   5    6.20    2.20
  10  -2  -5   -1.80    1.90
 -10  -2   5   -2.20    1.60
  -9  -2   5  373.06   12.60
  -9  -2   5  390.76   13.40
   9  -2  -5  357.56   14.30
   9  -2  -5  393.16   14.10
   9   2  -5  379.06   15.70
   8  -2  -5  410.46   14.20
  -8  -2   5  423.86   13.80
  -8  -2   5  410.06   14.30
   8  -2  -5  422.76   15.00
  -8   2   5  424.86   11.20
   8   2  -5  396.36   15.70
  -7  -2   5  672.83   19.40
   7  -2  -5  688.13   19.60
   7   2  -5  651.43   21.20
  -7   2   5  708.03   17.60
  -6  -2   5   54.79    4.60
   6  -2  -5   59.89    4.70
  -6   2   5   61.59    4.20
   6   2  -5   57.29    5.40
  -5  -2   5  490.85   15.20
   5  -2  -5  495.75   14.90
   5   2  -5  468.65   15.90
  -5   2   5  531.45   14.60
  -4  -2   5   11.80    2.50
   4  -2  -5   18.70    2.70
   4   2  -5   11.30    2.50
  -4   2   5   16.10    2.70
   3  -2  -5  851.21   21.10
  -3  -2   5  744.53   18.40
  -3  -2   5  781.22   21.10
  -3   2   5  868.01   21.00
   3   2  -5  800.22   21.60
   3   2  -5  800.42   18.60
  -2  -2   5   64.19    3.80
  -2  -2   5   69.99    4.60
   2  -2  -5   76.29    4.80
   2   2  -5   70.09    4.60
  -2   2   5   73.79    4.70
   2   2  -5   67.99    4.00
   1  -2  -5  398.96   12.10
  -1  -2   5  398.76   12.20
  -1  -2   5  383.36   11.90
   1   2  -5  394.96   12.30
   1   2  -5  373.46   11.80
  -1   2   5  388.26   12.10
   0  -2   5  109.49    5.20
   0  -2   5  112.29    6.40
   0  -2  -5  120.49    5.80
   0   2   5  113.19    5.70
   0   2  -5  110.59    5.30
   1  -2   5    5.00    1.50
  -1  -2  -5    9.60    2.20
   1  -2   5    7.30    2.60
   1   2   5    7.30    1.90
  -1   2  -5    8.70    2.70
  -1   2  -5    7.60    1.60
   2  -2   5 3335.17   74.69
   2  -2   5 3360.26   68.69
  -2  -2  -5 3307.67   73.59
  -2   2  -5 3258.57   74.49
   3  -2   5 1262.37   34.50
   3  -2   5 1271.77   27.30
  -3  -2  -5 1259.87   33.20
  -3  -2  -5 1271.67   29.00
  -3  -2  -5 1247.88   29.30
   3   2   5 1276.47   29.90
  -3   2  -5 1285.67   34.70
   4  -2   5   70.39    6.80
  -4  -2  -5   63.69    3.60
  -4  -2  -5   62.39    6.10
  -4  -2  -5   68.49    3.80
  -4   2  -5   77.19    7.10
   4   2   5   65.29    4.40
   5  -2   5  481.25   19.10
  -5  -2  -5  476.45   18.00
  -5  -2  -5  448.56   11.00
  -5   2  -5  468.65   18.90
   5   2   5  466.15   17.70
   5   2   5  492.65   14.20
  -6  -2  -5  120.99    9.10
   6  -2   5  126.39    9.90
   6   2   5  121.19    6.40
   6   2   5  108.79    8.50
   6   2   5  114.79    6.70
   7  -2   5  932.01   31.60
  -7   2  -5  968.90   31.80
   7   2   5  969.70   24.80
   7   2   5  951.10   30.00
   7   2   5  923.01   25.50
  -8  -2  -5    1.60    3.50
   8  -2   5    5.70    1.00
   8  -2   5   10.30    4.60
   8  -2   5    3.60    0.80
   8   2   5    9.90    3.10
   8   2   5    2.10    2.30
   8   2   5    8.40    4.00
  -8   2  -5    3.90    3.90
   9  -2   5   57.59    3.00
  -9  -2  -5   50.59    7.80
   9  -2   5   63.49    2.80
   9  -2   5   65.69    9.40
   9   2   5   53.89    5.20
  -9   2  -5   67.39    9.70
   9   2   5   71.19    6.40
  10  -2   5   27.90    6.90
  10  -2   5   36.00    2.80
  10  -2   5   40.00    3.10
 -10  -2  -5   42.20    7.80
 -10   2  -5   50.29    9.00
  10   2   5   43.10    5.80
  10   2   5   54.19    5.50
 -11  -2  -5  266.37   16.40
  11  -2   5  258.57    9.10
  11  -2   5  260.67   17.40
  11  -2   5  275.87    8.80
  11   2   5  269.97   12.30
  11   2   5  252.37   12.70
 -12  -2  -5    3.40    4.50
  12  -2   5    2.10    2.00
  12  -2   5    3.50    4.90
  12  -2   5    1.60    1.90
  12   2   5    1.30    3.40
  12   2   5    6.20    3.60
  13  -2   5   51.79    5.10
 -13  -2  -5   43.50    8.90
  13  -2   5   62.49   10.70
  13   2   5   72.99    8.60
  14  -2   5    5.00    6.00
  14  -2   5    0.40    2.50
 -14  -2  -5    3.00    5.00
  14   2   5    1.90    4.10
  15  -2   5  103.39   14.10
  15  -2   5   96.39    7.40
  15   2   5  115.29   10.50
  17  -3  -5  229.48   14.00
  17  -3  -5  248.98   15.20
  17   3  -5  234.88   17.30
  16  -3  -5    1.70    4.40
  16  -3  -5    3.80    4.50
  16   3  -5   -7.00    5.30
  15  -3  -5   97.39    9.30
  15   3  -5  102.89   12.40
  14  -3  -5   10.50    4.20
  14  -3  -5    6.00    4.00
  14   3  -5    2.60    4.40
  13  -3  -5  219.78   13.20
  13  -3  -5  234.48   12.40
  13   3  -5  227.08   14.60
  12  -3  -5   55.69    7.40
  12  -3  -5   59.09    6.90
 -12  -3   5   55.89    4.10
 -12  -3   5   55.19    4.10
  12   3  -5   70.99    9.40
  11  -3  -5    3.20    3.20
 -11  -3   5    4.30    2.50
  11  -3  -5    4.50    3.00
 -11  -3   5    6.20    2.50
  11   3  -5   11.10    4.70
 -10  -3   5   87.69    6.50
  10  -3  -5   82.29    7.60
  10  -3  -5   81.49    6.30
 -10  -3   5   83.09    6.10
  10   3  -5   84.09    7.90
  -9  -3   5 1006.80   29.60
   9  -3  -5 1076.99   28.00
  -9  -3   5 1029.70   28.20
  -8  -3   5    7.90    2.90
  -8  -3   5    3.60    2.60
   8  -3  -5    4.20    2.30
  -8   3   5    6.30    1.40
   8   3  -5    4.60    3.20
  -7  -3   5   45.70    4.50
   7  -3  -5   49.99    4.50
   7   3  -5   39.30    5.50
  -7   3   5   49.40    3.50
  -6  -3   5  754.32   24.60
   6  -3  -5  782.62   21.40
   6   3  -5  794.02   23.90
  -6   3   5  831.62   20.40
   5  -3  -5  748.23   20.60
  -5  -3   5  736.13   21.80
  -5   3   5  809.22   20.20
   5   3  -5  762.42   22.60
  -4  -3   5    0.20    0.70
   4  -3  -5   -1.30    1.10
  -4  -3   5    0.50    1.60
  -4   3   5   -0.60    1.30
   4   3  -5    3.20    1.90
   3  -3  -5 1223.58   29.60
  -3  -3   5 1188.78   27.50
  -3  -3   5 1204.78   30.20
   3   3  -5 1186.28   30.60
  -3   3   5 1294.57   29.80
   2  -3  -5   32.80    3.40
  -2  -3   5   31.40    3.10
  -2  -3   5   38.10    3.70
  -2   3   5   35.70    3.20
   2   3  -5   39.60    3.90
   1  -3  -5  771.32   20.60
  -1  -3   5  783.82   20.70
  -1  -3   5  803.12   21.10
   1   3  -5  786.52   21.20
   1   3  -5  806.52   20.90
  -1   3   5  775.82   20.70
   0  -3   5  624.94   16.80
   0  -3   5  605.84   18.40
   0   3   5  634.04   17.50
   0   3  -5  620.04   16.70
   0   3  -5  634.94   18.90
  -1  -3  -5 1694.13   39.80
   1  -3   5 1760.52   38.90
   1  -3   5 1790.42   42.90
  -1   3  -5 1775.02   43.10
   1   3   5 1738.23   40.20
  -1   3  -5 1735.53   38.20
  -2  -3  -5 1102.79   26.60
   2  -3   5 1105.29   30.30
   2  -3   5 1103.89   24.90
  -2   3  -5  990.70   29.60
   2   3   5 1078.09   26.80
  -3  -3  -5   18.10    3.90
   3  -3   5   14.70    1.90
  -3  -3  -5   18.30    2.90
   3  -3   5   23.80    4.70
  -3  -3  -5   14.90    2.60
   3   3   5   16.70    2.80
  -3   3  -5   23.70    4.70
  -4  -3  -5   59.19    4.30
  -4  -3  -5   70.59    6.60
   4  -3   5   64.19    7.00
   4  -3   5   57.29    2.50
  -4  -3  -5   63.79    4.70
  -4   3  -5   69.89    7.20
   4   3   5   64.19    4.90
   5  -3   5 2301.87   57.39
  -5  -3  -5 2209.98   54.49
  -5  -3  -5 2155.58   47.90
  -5  -3  -5 2168.78   48.20
   5   3   5 2170.28   50.29
  -5   3  -5 2277.47   56.99
  -6  -3  -5   12.60    1.90
  -6  -3  -5    9.60    3.60
   6  -3   5   16.50    4.90
  -6  -3  -5   13.60    2.00
   6   3   5   16.10    3.60
   6   3   5   13.40    3.70
  -6   3  -5    7.00    4.00
   7  -3   5   17.50    5.10
  -7  -3  -5   18.90    5.00
   7   3   5   12.70    3.20
  -7   3  -5    5.00    4.20
   7   3   5   17.30    3.90
  -8  -3  -5  114.09    9.80
   8  -3   5  101.89   10.20
   8   3   5   96.99    7.40
  -8   3  -5   86.89    9.90
   8   3   5  102.59    7.00
  -9  -3  -5   86.69    9.20
   9  -3   5   78.89   10.50
   9   3   5   81.39    7.10
   9   3   5   89.29    6.90
 -10  -3  -5   26.70    6.40
  10  -3   5   24.60    1.60
  10  -3   5   21.60    6.60
  10  -3   5   25.00    1.80
  10   3   5   29.10    5.40
  10   3   5   21.00    4.50
  11  -3   5   63.99   10.70
 -11  -3  -5   54.59    8.90
  11  -3   5   59.69    3.40
  11  -3   5   62.79    3.20
  11   3   5   64.49    6.80
 -12  -3  -5  104.59   11.00
  12  -3   5  123.99   14.70
  12  -3   5  107.49    5.30
  12   3   5  122.79    9.70
  12   3   5  125.89   10.10
 -13  -3  -5  323.67   19.20
  13  -3   5  334.57   21.20
  13  -3   5  293.57   10.20
  13   3   5  288.67   15.70
  14  -3   5    0.70    2.20
 -14  -3  -5   -2.10    4.50
  14   3   5   -0.80    4.00
  15  -3   5   27.50    4.20
  15  -3   5    8.60    7.80
 -15  -3  -5   30.40    8.30
  15   3   5   28.00    6.80
  16  -4  -5   89.59    9.30
  16  -4  -5   66.19    9.70
  16   4  -5   85.49   12.30
  15  -4  -5  196.48   12.30
  15  -4  -5  200.28   13.70
  15   4  -5  217.68   16.30
  14  -4  -5   44.40    6.60
  14  -4  -5   43.60    7.40
  14   4  -5   56.59    9.50
 -13  -4   5  240.38    8.20
  13  -4  -5  277.87   19.10
 -13  -4   5  260.77    8.40
  13  -4  -5  272.67   15.00
  13   4  -5  246.58   15.90
  12  -4  -5    7.80    3.70
 -12  -4   5    2.10    2.20
 -12  -4   5    3.20    2.40
  12   4  -5    5.70    4.70
  11  -4  -5  608.94   19.60
 -11  -4   5  590.14   19.50
 -11  -4   5  613.04   19.00
  11  -4  -5  581.64   22.90
  11   4  -5  606.84   23.80
 -10  -4   5  120.49    7.60
 -10  -4   5  112.29    7.80
  10  -4  -5  123.09    7.80
  10  -4  -5  129.89    9.80
  10   4  -5  132.19   10.10
   9  -4  -5  283.77   11.40
  -9  -4   5  271.07   12.30
  -9  -4   5  261.27   11.40
   9   4  -5  260.97   13.80
  -8  -4   5  123.89    7.60
   8  -4  -5  114.19    6.80
  -8  -4   5  115.99    8.10
   7  -4  -5    5.00    2.40
  -7  -4   5    2.60    2.20
   7   4  -5   -0.50    2.50
  -7   4   5    4.30    1.60
  -6  -4   5   71.39    5.90
  -6  -4   5   68.99    2.40
   6  -4  -5   77.89    5.60
  -6   4   5   66.19    4.50
   6   4  -5   74.09    6.80
   5  -4  -5 1403.76   33.20
  -5  -4   5 1323.77   34.30
  -5   4   5 1385.46   32.40
   5   4  -5 1305.07   35.50
   4  -4  -5  661.83   18.90
  -4  -4   5  662.33   20.00
  -4   4   5  713.53   18.90
   4   4  -5  646.14   20.50
   3  -4  -5   81.39    5.20
  -3  -4   5   70.19    5.50
  -3  -4   5   83.49    4.60
   3   4  -5   77.99    5.90
  -3   4   5   78.79    5.10
   2  -4  -5  142.69    7.00
  -2  -4   5  138.19    7.20
  -2  -4   5  131.89    6.60
  -2   4   5  141.59    7.00
   2   4  -5  142.79    7.50
  -1  -4   5  714.93   19.70
  -1  -4   5  714.23   20.20
   1  -4  -5  703.83   19.60
  -1   4   5  689.83   19.50
   1   4  -5  680.63   19.50
   0  -4   5   37.90    4.30
   0  -4  -5   38.20    3.90
   0  -4   5   34.90    3.50
   0   4   5   38.60    3.60
   0   4  -5   37.80    3.50
   1  -4   5  219.08    8.30
   1  -4   5  210.78   10.50
  -1  -4  -5  215.98    9.00
  -1   4  -5  226.48    7.90
   1   4   5  204.68    9.00
   2  -4   5   19.90    5.00
  -2  -4  -5   15.90    3.10
   2  -4   5   24.50    3.00
   2   4   5   22.40    3.50
  -3  -4  -5  902.21   24.10
   3  -4   5  845.12   20.80
   3  -4   5  868.51   27.60
  -3  -4  -5  868.01   23.10
  -3   4  -5  881.21   27.60
  -4  -4  -5 1082.19   28.30
   4  -4   5 1083.99   24.60
  -4  -4  -5 1079.79   27.70
  -4  -4  -5 1130.99   31.70
   4  -4   5 1115.29   33.50
  -4   4  -5 1152.38   33.80
   4   4   5 1115.49   29.00
   5  -4   5  316.37   16.10
  -5  -4  -5  327.17   11.30
  -5  -4  -5  319.77   11.60
  -5  -4  -5  311.57   14.40
   5   4   5  346.47   12.80
  -6  -4  -5    2.20    1.90
  -6  -4  -5    4.60    3.50
   6  -4   5   -0.50    2.70
  -6  -4  -5   -0.70    1.60
   6   4   5    2.00    2.40
  -7  -4  -5 1684.73   46.10
   7  -4   5 1743.53   49.70
  -7  -4  -5 1671.93   37.60
  -7  -4  -5 1705.53   37.70
   7   4   5 1718.93   43.60
   7   4   5 1668.63   42.20
  -8  -4  -5   17.40    5.20
   8  -4   5    9.00    4.70
   8   4   5    9.40    3.70
   8   4   5    5.20    3.00
   9  -4   5   26.70    6.60
  -9  -4  -5   31.90    6.70
   9   4   5   32.50    5.30
   9   4   5   29.00    5.70
 -10  -4  -5   97.99   10.20
  10  -4   5  107.09   12.90
  10   4   5   81.69    8.30
  11  -4   5  337.07   20.50
 -11  -4  -5  316.37   17.90
  11  -4   5  308.97    7.40
  11   4   5  317.87   15.20
  11   4   5  314.17   15.90
  12  -4   5   30.90    7.90
  12  -4   5   34.10    2.50
 -12  -4  -5   37.90    8.50
  12   4   5   39.50    6.90
  12   4   5   37.50    7.10
 -13  -4  -5   46.70    8.80
  13  -4   5   29.70    7.70
  13  -4   5   30.80    3.10
  13   4   5   32.50    6.90
 -14  -4  -5   23.40    6.80
  14  -4   5   17.50    2.70
  14  -4   5   -0.50    6.00
  14   4   5   13.80    5.80
  15  -4   5  185.48    7.80
 -15  -4  -5  166.08   15.50
  15  -4   5  194.08   18.20
  16  -5  -5  112.69    9.80
  16  -5  -5  101.69   11.80
  16   5  -5  104.49   13.80
  15  -5  -5    4.40    4.20
  15  -5  -5    7.30    4.80
  15   5  -5    0.30    5.50
  14  -5  -5  141.69    9.70
  14  -5  -5  145.69   12.40
  14   5  -5  139.39   13.20
 -13  -5   5  330.97   11.80
  13  -5  -5  349.17   15.00
 -13  -5   5  327.57   12.00
  13  -5  -5  313.57   17.70
  13   5  -5  335.77   18.90
 -12  -5   5   47.60    5.60
 -12  -5   5   39.20    5.00
  12  -5  -5   47.40    6.00
  12  -5  -5   49.50    8.00
  12   5  -5   45.70    8.00
 -11  -5   5   47.40    6.10
  11  -5  -5   49.99    7.80
 -11  -5   5   59.99    6.10
  11  -5  -5   50.79    5.50
  11   5  -5   51.29    8.40
  10  -5  -5  106.39    7.20
  10  -5  -5   89.19    8.90
 -10  -5   5  105.49    8.00
 -10  -5   5   85.49    7.10
  10   5  -5   95.19    9.30
  -9  -5   5  851.91   25.90
   9  -5  -5  797.52   23.40
  -9  -5   5  841.42   25.00
   9   5  -5  834.42   28.50
   8  -5  -5    9.90    2.90
  -8  -5   5    8.80    3.10
  -8  -5   5    7.10    1.10
  -8  -5   5    6.00    3.10
   8   5  -5    6.50    3.50
  -7  -5   5   78.99    6.90
  -7  -5   5   62.89    3.00
   7  -5  -5   67.99    5.50
  -7  -5   5   65.29    6.00
  -7   5   5   70.89    4.30
   7   5  -5   66.09    9.10
   6  -5  -5   43.30    4.60
  -6  -5   5   37.20    5.30
   6   5  -5   31.40    5.40
  -6   5   5   37.00    3.80
  -5  -5   5 2068.59   49.40
   5  -5  -5 2033.70   47.40
   5   5  -5 1964.50   50.29
  -5   5   5 2096.89   46.70
  -4  -5   5  388.36   14.50
   4  -5  -5  401.16   13.50
   4   5  -5  354.36   14.50
  -4   5   5  397.06   13.20
   3  -5  -5 1780.42   41.80
  -3  -5   5 1783.52   43.10
  -3   5   5 1784.22   41.70
   3   5  -5 1701.23   43.30
   2  -5  -5 1504.45   36.50
  -2  -5   5 1438.46   37.40
  -2   5   5 1487.45   36.50
   2   5  -5 1551.04   37.80
  -1  -5   5 1273.77   31.30
   1  -5  -5 1176.68   30.50
  -1  -5   5 1203.18   31.60
   1   5  -5 1177.28   30.80
  -1   5   5 1223.48   31.60
   0  -5  -5  119.49    6.70
   0  -5   5  117.49    6.70
   0  -5   5  128.29    7.90
   0   5  -5  118.59    6.70
   0   5   5  114.49    8.20
   1  -5   5  380.56   12.60
   1  -5   5  369.46   15.70
  -1  -5  -5  347.87   13.00
   1   5   5  371.76   13.60
  -1   5  -5  394.06   12.10
   2  -5   5  110.09    8.40
   2  -5   5   95.09    5.50
  -2  -5  -5  102.79    6.60
  -2  -5  -5  106.39    8.50
   2   5   5   98.89    6.70
   3  -5   5   46.80    3.90
  -3  -5  -5   47.20    6.50
  -3  -5  -5   49.99    4.90
   3  -5   5   45.60    6.90
   3   5   5   46.50    5.00
   4  -5   5  537.35   21.60
  -4  -5  -5  558.94   17.20
   4  -5   5  524.55   14.30
   4   5   5  521.15   17.80
   5  -5   5  630.14   24.40
  -5  -5  -5  615.74   19.70
  -5  -5  -5  614.24   18.60
   5  -5   5  600.04   15.30
  -5  -5  -5  628.94   22.00
   5   5   5  634.64   20.20
  -6  -5  -5  177.18    8.80
   6  -5   5  194.48   20.80
  -6  -5  -5  191.08    8.80
   6   5   5  194.88   10.20
  -7  -5  -5  391.86   13.20
  -7  -5  -5  403.06   17.80
  -7  -5  -5  402.86   13.50
   7  -5   5  438.76   21.10
   7   5   5  401.56   16.10
  -8  -5  -5   83.69    5.00
   8  -5   5   86.39   11.20
  -8  -5  -5   81.59    5.00
  -8  -5  -5   78.59    8.70
   8   5   5   77.89   10.00
   8   5   5   82.59    7.20
  -9  -5  -5  479.25   20.90
  -9  -5  -5  468.75   11.00
   9  -5   5  507.75   24.50
   9   5   5  489.55   19.70
   9   5   5  471.65   18.70
  10  -5   5  108.49   11.70
 -10  -5  -5   72.79    9.70
  10   5   5   92.39    9.30
  10   5   5   83.09    8.20
 -11  -5  -5    1.20    4.10
  11  -5   5    4.80    5.30
  11   5   5    0.70    4.10
  11   5   5    4.10    3.60
  12  -5   5   72.69   12.30
 -12  -5  -5   63.99    9.90
  12   5   5   81.39    9.40
  12   5   5   58.99    8.70
  13  -5   5   53.69   13.90
 -13  -5  -5   59.09    9.70
  13  -5   5   77.79    3.50
  13   5   5   50.39    8.80
  14  -5   5   -1.90    1.30
  14  -5   5   -8.10    5.30
 -14  -5  -5    1.60    4.70
  15  -5   5   29.80    3.10
 -15  -5  -5   37.00    8.50
  16  -6  -5    9.80    4.90
  16  -6  -5    9.00    5.70
  16   6  -5   11.20    7.70
  15  -6  -5   59.39    7.70
  15  -6  -5   73.89   10.60
  15   6  -5   85.49   11.90
  14  -6  -5    8.00    3.80
 -14  -6   5    1.40    2.40
 -14  -6   5    6.60    2.70
  14  -6  -5    6.20    4.40
  14   6  -5    9.60    5.60
 -13  -6   5   -3.60    2.60
  13  -6  -5   -4.40    3.60
  13  -6  -5    5.40    3.60
 -13  -6   5    3.30    2.80
  13   6  -5    9.50    5.00
  12  -6  -5   26.30    6.80
 -12  -6   5   39.30    5.50
  12   6  -5   36.70    7.80
 -11  -6   5  276.37   12.90
  11  -6  -5  290.47   12.70
 -11  -6   5  285.57   13.60
  11  -6  -5  281.27   16.60
  11   6  -5  291.77   17.10
  10  -6  -5  115.39    7.80
 -10  -6   5  119.89    8.60
 -10  -6   5  113.59    9.00
 -10  -6   5  118.99    4.10
  10   6  -5  131.09   11.20
  -9  -6   5  309.67   14.00
   9  -6  -5  309.17   12.60
  -9  -6   5  343.57   15.30
  -9  -6   5  313.97    8.90
   9   6  -5  312.17   16.60
  -8  -6   5   19.70    4.90
  -8  -6   5   29.90    2.70
  -8  -6   5   31.60    5.10
   8  -6  -5   25.70    4.10
   8   6  -5   27.80    5.80
   7  -6  -5    8.80    2.60
  -7  -6   5    9.10    3.70
  -7  -6   5    6.70    3.10
   7   6  -5   17.30    4.80
  -7   6   5    9.00    2.10
   6  -6  -5   17.50    3.50
  -6  -6   5   18.80    4.30
   6   6  -5   12.10    4.30
  -6   6   5   12.20    2.80
  -5  -6   5 1928.01   48.20
   5  -6  -5 1920.91   45.90
   5   6  -5 1950.80   49.70
  -5   6   5 1945.31   45.20
   4  -6  -5  366.86   13.50
  -4  -6   5  341.27   14.30
  -4   6   5  384.76   13.40
   4   6  -5  383.36   15.70
   3  -6  -5  913.11   25.60
  -3  -6   5  945.41   27.10
   3   6  -5  951.10   27.70
   2  -6  -5  184.68    9.30
  -2  -6   5  203.08   10.10
  -2   6   5  202.08    9.60
   2   6  -5  215.18   10.40
   1  -6  -5 1634.34   41.20
  -1  -6   5 1752.22   42.10
  -1   6   5 1701.33   41.80
   1   6  -5 1709.73   41.90
   0  -6  -5 1163.28   30.90
   0   6   5 1137.29   31.20
   0   6  -5 1229.18   30.70
  -1  -6  -5  161.58    8.70
   1  -6   5  149.99    8.00
   1  -6   5  133.19    9.40
   1   6   5  150.18    8.60
   2  -6   5   10.70    4.20
  -2  -6  -5   14.70    3.90
  -2  -6  -5   12.30    3.30
   2  -6   5   15.90    3.10
   2   6   5   15.80    3.70
  -3  -6  -5  792.12   24.40
  -3  -6  -5  800.62   23.50
   3  -6   5  805.82   21.50
   3  -6   5  809.22   27.60
   3   6   5  785.82   24.20
   4  -6   5   70.09    4.70
  -4  -6  -5   73.89    6.50
   4  -6   5   73.59    8.10
  -4  -6  -5   67.49    5.90
   4   6   5   61.99    6.10
  -5  -6  -5    1.20    2.90
   5  -6   5    1.20    3.80
  -5  -6  -5    2.00    2.60
   5  -6   5    3.40    1.80
   5   6   5    4.60    3.10
  -6  -6  -5  349.07   13.50
  -6  -6  -5  374.96   16.80
   6  -6   5  342.07   18.60
  -6  -6  -5  341.57   14.00
   6   6   5  340.97   14.90
  -7  -6  -5  480.45   16.60
  -7  -6  -5  464.35   19.90
   7  -6   5  430.26   22.00
  -7  -6  -5  502.75   16.30
   7   6   5  511.55   19.40
   8  -6   5   18.80    6.30
  -8  -6  -5   14.30    5.10
  -8  -6  -5   15.10    3.40
  -8  -6  -5   11.70    3.30
   8   6   5   19.40    4.70
  -9  -6  -5    0.10    2.00
   9  -6   5    0.70    4.30
  -9  -6  -5    4.30    2.40
  -9  -6  -5   -0.90    3.40
   9   6   5   -1.90    2.90
   9   6   5    0.70    3.50
 -10  -6  -5    2.50    1.10
 -10  -6  -5    3.60    4.10
  10  -6   5    1.10    4.60
  10   6   5    9.30    4.80
  10   6   5    3.10    4.10
  11  -6   5  103.09    3.40
 -11  -6  -5  126.39   11.70
  11  -6   5  117.59   14.80
  11   6   5  100.29   10.60
  11   6   5  102.39    9.90
 -12  -6  -5    8.30    5.30
  12  -6   5   13.20    1.30
  12  -6   5   13.10    7.40
  12   6   5    4.80    4.60
  12   6   5    7.50    5.10
 -13  -6  -5   46.90    8.70
  13  -6   5   49.80    2.50
  13  -6   5   47.30   11.40
  14  -6   5   91.99   13.70
  14  -6   5   77.09    3.30
 -14  -6  -5   80.29   11.60
  16  -7  -5   21.90    7.90
  16  -7  -5   35.70    6.70
  16   7  -5   23.60    8.30
 -15  -7   5   -2.10    2.00
 -15  -7   5   -1.50    1.80
  15  -7  -5    0.40    4.50
  15  -7  -5    0.20    3.50
  15   7  -5   -3.70    6.00
  14  -7  -5  122.89   14.20
 -14  -7   5  148.89   11.40
 -14  -7   5  137.39    8.40
  14  -7  -5  140.89    9.90
  14   7  -5  133.09   13.60
 -13  -7   5  306.57   13.90
  13  -7  -5  307.87   14.00
  13  -7  -5  321.87   19.60
  13   7  -5  296.77   19.00
  12  -7  -5    4.40    4.30
  12  -7  -5    5.80    3.30
 -12  -7   5    5.60    3.80
  12   7  -5    4.00    4.80
  11  -7  -5   88.49    8.40
 -11  -7   5  115.79    8.70
 -11  -7   5   81.99    8.20
 -11  -7   5   79.19    3.60
  11  -7  -5   95.39   10.60
  11   7  -5   92.79   11.70
 -10  -7   5  140.59   10.10
 -10  -7   5  153.28    6.00
  10  -7  -5  162.58    9.30
 -10  -7   5  110.89    9.90
  10   7  -5  138.19   12.20
   9  -7  -5  294.07   12.60
  -9  -7   5  274.47   14.10
  -9  -7   5  297.07    9.50
  -9  -7   5  283.97   14.70
   9   7  -5  260.07   15.80
   8  -7  -5   38.10    5.10
  -8  -7   5   31.60    5.80
  -8  -7   5   36.30    6.20
   8   7  -5   42.20    7.60
   7  -7  -5  451.85   15.80
  -7  -7   5  431.56   18.10
   7   7  -5  423.26   19.10
  -7   7   5  421.66   13.30
  -6  -7   5  201.78   11.50
   6  -7  -5  198.68    9.90
  -6  -7   5  220.38   12.40
   6   7  -5  224.18   12.60
  -6   7   5  213.08    9.30
   5  -7  -5  610.54   19.60
  -5  -7   5  647.94   21.80
  -5   7   5  603.44   18.90
   5   7  -5  627.04   22.70
   4  -7  -5    3.10    2.60
  -4  -7   5    5.50    3.40
  -4   7   5    3.80    2.70
  -3  -7   5  652.53   21.50
   3  -7  -5  645.64   20.30
  -3   7   5  638.94   20.30
   3   7  -5  635.94   22.00
  -2  -7   5  966.10   28.40
   2  -7  -5  944.01   27.20
   2   7  -5  992.00   28.70
  -2   7   5 1000.90   27.80
  -1  -7   5  578.44   19.50
   1  -7  -5  591.64   19.10
  -1   7   5  554.64   19.10
   1   7  -5  585.94   19.60
   0  -7   5   49.30    5.30
   0  -7  -5   47.60    5.00
   0   7   5   47.00    5.80
   0   7  -5   48.10    5.70
  -1  -7  -5  206.08   10.50
   1  -7   5  192.88    9.80
   1  -7   5  200.68   12.00
   1   7   5  195.78   10.50
   2  -7   5  108.49    9.30
  -2  -7  -5  105.89    8.30
  -2  -7  -5  107.29    7.70
   2   7   5  116.79    8.10
  -3  -7  -5  303.77   13.30
   3  -7   5  307.37   11.90
  -3  -7  -5  323.27   14.40
   3  -7   5  321.77   16.50
   3   7   5  308.87   14.00
  -4  -7  -5   45.80    6.50
   4  -7   5   43.00    4.30
   4  -7   5   36.80    8.00
  -4  -7  -5   45.10    6.00
   4   7   5   45.00    6.20
  -5  -7  -5  449.66   17.50
   5  -7   5  465.65   14.50
  -5  -7  -5  470.75   16.90
   5  -7   5  495.25   22.30
   5   7   5  375.66   19.60
   6  -7   5  531.05   24.90
  -6  -7  -5  597.84   22.40
  -6  -7  -5  550.04   19.00
   6  -7   5  582.54   16.40
  -6  -7  -5  550.24   19.80
   6   7   5  581.54   21.40
  -7  -7  -5  338.37   13.90
  -7  -7  -5  343.87   16.80
   7  -7   5  333.07   19.60
  -7  -7  -5  335.27   14.40
   7   7   5  336.47   15.90
  -8  -7  -5   31.30    5.20
  -8  -7  -5   17.10    5.60
  -8  -7  -5   27.20    4.70
   8  -7   5   32.10    8.00
   8   7   5   21.20    5.60
  -9  -7  -5  138.69   11.90
  -9  -7  -5  174.28    9.00
   9  -7   5  175.48   15.20
  -9  -7  -5  169.98    9.90
   9   7   5  139.59   11.30
 -10  -7  -5   17.70    5.70
 -10  -7  -5   12.90    3.00
 -10  -7  -5   14.00    3.10
  10  -7   5    5.40    5.80
  10   7   5   14.20    5.30
  11  -7   5   56.49   11.10
  11  -7   5   56.89    3.30
 -11  -7  -5   54.09    9.10
  11   7   5   43.00    8.30
  12  -7   5   92.19    3.90
  12  -7   5  107.69   14.90
 -12  -7  -5   77.49   10.80
  12   7   5   81.09   10.40
  13  -7   5  123.59   16.60
 -13  -7  -5  113.29   12.40
  13  -7   5  113.89    4.30
  14  -7   5    5.10    1.40
 -14  -7  -5    5.30    5.30
 -15  -8   5   74.99    8.90
 -15  -8   5   80.69    7.10
  15  -8  -5   89.09   13.20
  15  -8  -5   96.79    8.70
  15   8  -5   81.49   13.50
 -14  -8   5    9.00    4.10
  14  -8  -5    3.50    6.00
  14  -8  -5    4.20    3.80
 -14  -8   5    4.60    4.10
  14   8  -5    7.00    6.70
 -13  -8   5    2.70    3.90
 -13  -8   5   -2.80    3.40
  13  -8  -5   -0.20    2.90
  13  -8  -5   -1.90    4.00
  13   8  -5   -3.80    4.10
  12  -8  -5  387.56   15.90
 -12  -8   5  360.66   16.50
  12  -8  -5  366.06   21.80
 -12  -8   5  401.56   17.60
  12   8  -5  379.46   22.20
  11  -8  -5   14.60    4.20
 -11  -8   5   20.00    5.30
 -11  -8   5   17.00    5.00
 -11  -8   5   11.50    2.20
  11  -8  -5   12.50    5.90
  11   8  -5    8.90    5.80
 -10  -8   5   -7.30    3.10
 -10  -8   5    0.40    1.50
 -10  -8   5   -3.50    3.50
  10  -8  -5   -2.00    4.50
  10   8  -5    4.80    4.60
  -9  -8   5  188.78   12.10
  -9  -8   5  201.68   12.90
   9  -8  -5  198.18   12.20
  -9  -8   5  190.88    8.10
   9   8  -5  182.28   13.80
   8  -8  -5  661.13   21.20
  -8  -8   5  672.13   24.40
  -8  -8   5  654.13   23.70
   8   8  -5  627.04   25.70
  -7  -8   5  159.08   10.80
  -7  -8   5  174.98   11.70
   7  -8  -5  154.68    9.30
   7   8  -5  177.68   12.50
  -6  -8   5   63.39    8.10
   6  -8  -5   62.59    6.00
  -6  -8   5   52.69    7.50
  -6   8   5   64.39    5.60
   6   8  -5   61.19    8.40
  -5  -8   5  160.88   11.20
   5  -8  -5  169.98    9.90
  -5  -8   5  182.68   11.20
  -5   8   5  175.68    9.40
   5   8  -5  172.98   11.80
   4  -8  -5  902.61   26.00
  -4   8   5  869.81   25.60
   4   8  -5  841.92   28.00
   3  -8  -5  203.48   10.50
  -3  -8   5  204.08   11.40
  -3   8   5  197.08   10.40
   3   8  -5  218.28   12.20
  -2  -8   5  375.46   16.00
   2  -8  -5  407.36   15.60
   2   8  -5  380.36   16.20
  -2   8   5  395.86   15.70
  -1  -8   5  788.82   25.20
   1  -8  -5  801.22   25.30
   1   8  -5  855.61   25.70
  -1   8   5  798.82   25.10
   0  -8   5   46.90    6.10
   0   8   5   40.10    6.00
   0   8  -5   54.79    6.40
  -1  -8  -5  653.43   23.00
   1  -8   5  726.03   22.60
   1   8   5  699.03   23.40
   2  -8   5  475.95   20.80
  -2  -8  -5  452.35   18.50
   2  -8   5  497.45   17.30
  -2  -8  -5  481.45   18.10
   2   8   5  462.55   18.80
   3  -8   5 1078.29   29.20
  -3  -8  -5 1077.99   32.20
  -3  -8  -5 1042.40   30.50
   3   8   5 1021.60   32.10
   4  -8   5  298.27   17.30
  -4  -8  -5  314.77   15.00
   4  -8   5  323.67   12.70
  -4  -8  -5  317.77   14.20
   4   8   5  307.67   14.90
  -5  -8  -5   64.09    7.50
   5  -8   5   60.49    9.10
  -5  -8  -5   60.19    7.90
   5  -8   5   64.59    6.60
   5   8   5   78.79    7.80
   6  -8   5  325.77   19.40
  -6  -8  -5  373.36   16.30
   6  -8   5  351.86   12.90
  -6  -8  -5  348.17   15.00
   6   8   5  350.56   16.70
  -7  -8  -5  238.18   12.80
  -7  -8  -5  215.98   13.90
   7  -8   5  228.28   16.80
  -7  -8  -5  230.78   12.10
   7   8   5  220.48   13.70
  -8  -8  -5  696.33   22.70
  -8  -8  -5  683.93   23.20
   8  -8   5  658.93   30.60
  -8  -8  -5  688.83   26.60
   8   8   5  700.23   26.30
  -9  -8  -5   56.99    6.80
   9  -8   5   54.09   10.50
  -9  -8  -5   50.19    8.30
   9   8   5   51.29    8.40
 -10  -8  -5  287.27   12.20
 -10  -8  -5  298.07   12.40
  10  -8   5  290.27   10.10
 -10  -8  -5  307.17   17.70
  10  -8   5  313.27   21.60
  10   8   5  277.97   16.60
 -11  -8  -5  140.49    7.20
  11  -8   5  160.78   16.80
  11  -8   5  130.69    6.10
 -11  -8  -5  137.19    7.10
 -11  -8  -5  118.39   11.90
  11   8   5  164.68   12.90
  12  -8   5   14.00    2.40
 -12  -8  -5   21.70    7.10
  12  -8   5   17.00    7.60
 -13  -8  -5    3.50    5.20
  13  -8   5   -1.00    1.40
 -14  -8  -5   84.59   11.60
  14  -8   5   96.59    4.30
  15  -9  -5   -4.80    3.30
  15  -9  -5   -0.40    6.60
 -15  -9   5    1.80    6.40
 -15  -9   5    3.60    3.60
  15   9  -5    4.40    6.50
  14  -9  -5  136.09   14.60
 -14  -9   5  141.29   10.50
 -14  -9   5  137.59   10.20
  14  -9  -5  143.89   10.40
 -13  -9   5  119.99   10.10
  13  -9  -5  121.69    9.20
  13  -9  -5  114.49   14.50
 -13  -9   5  110.09    9.50
  13   9  -5  113.59   14.50
 -12  -9   5   42.10    3.50
  12  -9  -5   39.00    6.20
 -12  -9   5   33.90    6.70
  12  -9  -5   42.70    9.60
 -12  -9   5   42.60    7.40
  12   9  -5   34.60    8.90
 -11  -9   5   20.30    3.20
 -11  -9   5   28.90    6.10
  11  -9  -5   16.90    4.60
 -11  -9   5   23.70    6.00
  11   9  -5   16.30    6.80
 -10  -9   5  768.52   21.30
 -10  -9   5  795.92   28.40
 -10  -9   5  752.62   27.00
  10  -9  -5  794.52   25.00
  10   9  -5  764.62   31.30
  -9  -9   5   50.39    8.00
  -9  -9   5   56.39    8.30
   9  -9  -5   55.69    6.90
   9   9  -5   40.80    8.40
  -8  -9   5   89.89    8.80
   8  -9  -5   86.89    7.40
  -8  -9   5   74.09    9.30
   8   9  -5   62.59    9.40
  -7  -9   5  180.18   12.20
   7  -9  -5  164.88   10.10
  -7  -9   5  171.38   11.70
   7   9  -5  183.68   13.40
  -6  -9   5 1150.98   35.10
   6  -9  -5 1105.49   31.40
  -6  -9   5 1060.39   33.70
  -6   9   5 1101.79   30.20
   6   9  -5 1054.79   35.00
  -5  -9   5   26.80    5.70
  -5  -9   5   32.80    6.40
   5  -9  -5   40.00    6.10
   5   9  -5   31.60    6.50
  -5   9   5   35.60    5.30
  -4  -9   5   98.19    8.70
   4  -9  -5   91.49    7.50
  -4  -9   5   97.09    8.50
   4   9  -5   89.99    9.00
  -4   9   5   82.89    7.40
   3  -9  -5   79.59    7.30
  -3  -9   5   91.59    8.30
  -3   9   5   82.49    7.30
   3   9  -5   94.79    8.80
  -2  -9   5 1106.79   37.90
   2  -9  -5 1180.08   32.90
  -2   9   5 1113.19   32.80
   2   9  -5 1173.18   34.20
   1  -9  -5   18.40    4.40
  -1  -9   5   22.30    4.90
  -1   9   5   11.70    3.50
   1   9  -5   17.80    4.60
   0  -9  -5  342.27   15.30
   0  -9   5  346.27   15.40
   0   9   5  386.06   19.20
  -1  -9  -5 1398.96   38.70
  -1  -9  -5 1431.06   40.80
   1  -9   5 1401.86   38.50
   1   9   5 1453.35   40.20
  -2  -9  -5 1080.49   31.80
  -2  -9  -5 1069.69   33.40
   2  -9   5 1052.09   30.80
   2   9   5 1107.39   33.30
   3  -9   5  238.18   15.60
   3  -9   5  263.77   12.40
  -3  -9  -5  260.87   14.30
  -3  -9  -5  268.97   13.50
   3   9   5  254.27   13.90
  -4  -9  -5  473.15   18.70
  -4  -9  -5  456.35   19.60
   4  -9   5  495.65   17.30
   4  -9   5  458.05   22.50
   4   9   5  457.95   19.60
   5  -9   5  213.48   15.80
  -5  -9  -5  226.28   13.40
   5  -9   5  260.47   11.60
  -5  -9  -5  235.28   13.10
   5   9   5  244.58   13.80
   6  -9   5  320.77   19.60
  -6  -9  -5  325.97   15.20
   6  -9   5  303.97   12.80
  -6  -9  -5  308.77   15.50
   6   9   5  303.47   16.30
   7  -9   5   15.30    6.90
  -7  -9  -5   25.10    6.00
  -7  -9  -5   16.60    5.30
  -7  -9  -5   21.30    5.10
   7  -9   5   22.80    4.30
   7   9   5   26.60    6.50
   8  -9   5  322.57   21.50
   8  -9   5  329.87   14.10
  -8  -9  -5  331.27   15.70
  -8  -9  -5  293.37   16.80
  -8  -9  -5  299.87   14.80
   8   9   5  289.67   16.90
  -9  -9  -5  193.08   14.20
  -9  -9  -5  184.48   11.00
   9  -9   5  192.38    9.10
   9  -9   5  178.78   16.90
   9   9   5  182.88   14.20
 -10  -9  -5  185.78   10.70
 -10  -9  -5  162.78   13.50
  10  -9   5  175.28    8.30
 -10  -9  -5  161.78   10.40
  10   9   5  174.78   13.90
  11  -9   5   13.90    2.90
 -11  -9  -5   21.50    6.10
  11  -9   5   20.70    8.90
 -11  -9  -5   17.40    4.30
 -11  -9  -5   16.20    4.10
 -12  -9  -5  173.88   13.80
 -12  -9  -5  135.69    6.70
 -12  -9  -5  144.39    6.90
  12  -9   5  130.79   17.80
  12  -9   5  147.79    6.80
 -13  -9  -5   77.49   11.00
  13  -9   5   75.19    4.90
  15 -10  -5   80.49    9.40
 -15 -10   5   89.39    9.10
  15 -10  -5   70.39   13.30
  15  10  -5  100.79   14.80
 -14 -10   5   32.60    6.00
 -14 -10   5   20.10    5.80
  14 -10  -5   16.50    5.10
  14 -10  -5   19.20    7.60
  14  10  -5    2.50    5.70
  13 -10  -5   -4.40    6.30
 -13 -10   5    1.60    1.20
 -13 -10   5    4.10    4.30
 -13 -10   5    7.30    5.00
  13 -10  -5   -3.80    3.60
  12 -10  -5  432.96   18.00
 -12 -10   5  432.26   20.40
 -12 -10   5  452.55   14.00
 -12 -10   5  429.86   19.80
  12 -10  -5  449.36   25.10
  12  10  -5  461.55   25.20
  11 -10  -5  185.28   11.50
 -11 -10   5  221.38    9.60
 -11 -10   5  163.18   12.30
 -11 -10   5  206.48   14.30
  11  10  -5  223.38   17.30
 -10 -10   5   22.30    3.90
 -10 -10   5   15.60    5.90
  10 -10  -5   16.80    5.00
 -10 -10   5   22.30    6.50
  10  10  -5    7.40    6.20
  -9 -10   5  164.28   12.30
  -9 -10   5  166.48   12.20
   9 -10  -5  151.58   10.30
   9  10  -5  162.28   14.10
   8 -10  -5  703.63   23.40
  -8 -10   5  673.43   26.30
  -8 -10   5  684.33   26.30
   8  10  -5  687.23   28.50
  -7 -10   5    6.40    4.40
   7 -10  -5    2.70    3.00
  -7 -10   5   -0.80    3.60
   7  10  -5    4.70    4.30
   6 -10  -5   -1.70    2.40
  -6 -10   5   -5.10    2.60
  -6 -10   5    3.40    3.90
   6  10  -5   -1.10    3.50
  -5 -10   5  147.79   11.10
  -5 -10   5  131.49   10.40
   5 -10  -5  165.18   10.20
   5  10  -5  139.09   11.70
  -5  10   5  138.09    9.40
  -4 -10   5  683.13   25.00
  -4 -10   5  667.23   25.30
   4 -10  -5  682.73   23.20
   4  10  -5  691.33   26.10
  -4  10   5  660.73   23.00
  -3 -10   5   26.50    5.90
  -3 -10   5   33.00    6.40
   3 -10  -5   29.00    5.50
   3  10  -5   25.50    5.90
  -3  10   5   37.30    6.00
   2 -10  -5   68.69    7.10
  -2 -10   5   79.19    8.20
   2  10  -5   84.19    8.50
   1 -10  -5  167.98   10.80
  -1 -10   5  171.38   11.30
  -1  10   5  156.98   10.90
   1  10  -5  162.88   10.90
   0 -10   5  559.34   21.30
   0 -10  -5  558.44   21.00
   0  10   5  545.25   21.30
  -1 -10  -5  112.89    8.80
  -1 -10  -5  119.29   10.30
   1  10   5  118.69    9.70
  -2 -10  -5  226.58   13.50
   2 -10   5  196.78   11.70
  -2 -10  -5  198.58   12.10
   2  10   5  189.48   12.40
  -3 -10  -5  301.47   16.30
   3 -10   5  316.37   14.60
  -3 -10  -5  308.17   15.30
   3 -10   5  318.77   18.40
   3  10   5  302.17   16.10
  -4 -10  -5  226.88   14.10
   4 -10   5  243.38   12.50
   4 -10   5  263.37   17.20
  -4 -10  -5  252.77   13.70
   4  10   5  242.38   14.50
   5 -10   5    6.00    3.40
  -5 -10  -5    2.50    4.00
  -5 -10  -5    5.50    3.90
   5 -10   5   13.40    5.90
   5  10   5   -0.40    3.70
  -6 -10  -5  257.77   14.10
   6 -10   5  256.57   18.60
  -6 -10  -5  252.87   15.20
   6 -10   5  245.48   12.30
   6  10   5  271.87   16.00
   7 -10   5  187.98   16.40
  -7 -10  -5  181.78   11.80
   7 -10   5  186.88   10.20
  -7 -10  -5  154.88   12.30
   7  10   5  149.49   12.60
  -8 -10  -5  229.48   13.30
   8 -10   5  225.68   11.20
  -8 -10  -5  242.18   15.50
   8 -10   5  249.38   11.70
  -8 -10  -5  231.98   13.80
   8 -10   5  183.18   17.20
   8  10   5  252.07   16.10
   9 -10   5   14.20    4.10
   9 -10   5   24.00   14.10
  -9 -10  -5   10.80    5.70
  -9 -10  -5   13.60    4.90
  -9 -10  -5   10.00    4.80
   9 -10   5    7.00    3.30
   9  10   5   11.20    6.00
  10 -10   5  382.16   25.00
 -10 -10  -5  367.86   16.20
  10 -10   5  360.26   14.30
 -10 -10  -5  371.96   16.90
 -10 -10  -5  398.36   20.80
  10 -10   5  380.56   14.00
  10  10   5  354.76   20.80
  11 -10   5    4.40    7.00
 -11 -10  -5   11.40    5.90
  11 -10   5   11.60    3.70
 -11 -10  -5   12.20    6.50
  11 -10   5   20.20    3.70
 -11 -10  -5   11.10    4.40
 -12 -10  -5  143.49   12.60
 -12 -10  -5  115.29    7.90
 -12 -10  -5  132.39   13.30
  12 -10   5  127.99    7.20
  12 -10   5  117.69    7.70
 -13 -10  -5    3.10    5.70
  13 -10   5    3.00    2.30
  13 -10   5   -0.10    2.40
 -14 -11   5  181.08   13.20
  14 -11  -5  173.98   12.00
  14 -11  -5  200.28   19.00
 -14 -11   5  191.28   13.50
  14  11  -5  183.38   17.40
 -13 -11   5    7.80    5.50
 -13 -11   5    7.20    5.00
  13 -11  -5   -5.70    6.60
 -13 -11   5   12.00    2.50
  13 -11  -5   17.40    5.50
  13  11  -5    9.60    7.40
 -12 -11   5    4.50    4.50
  12 -11  -5    4.50    5.90
 -12 -11   5    4.80    5.50
  12 -11  -5    0.90    3.60
 -12 -11   5    2.20    2.30
 -11 -11   5    6.50    3.00
 -11 -11   5  -14.00    4.60
 -11 -11   5    5.40    4.90
  11 -11  -5   -3.50    3.50
  11  11  -5   -2.00    4.50
 -10 -11   5  309.97   17.90
  10 -11  -5  288.07   14.70
 -10 -11   5  291.57   17.00
  10  11  -5  316.57   20.30
  -9 -11   5   32.30    7.30
   9 -11  -5   32.60    5.80
  -9 -11   5   31.90    7.30
   9  11  -5   27.00    7.90
  -8 -11   5   21.40    6.20
  -8 -11   5   24.50    6.20
   8 -11  -5   19.80    5.20
   8  11  -5   21.60    6.30
   7 -11  -5   96.29    8.90
  -7 -11   5   97.59   10.30
  -7 -11   5   86.39   10.60
   7  11  -5  102.99   10.80
  -6 -11   5  262.37   15.70
  -6 -11   5  270.77   15.80
   6 -11  -5  266.07   13.80
   6  11  -5  247.58   16.20
   5 -11  -5   29.50    5.70
  -5 -11   5   15.30    5.20
  -5 -11   5   27.60    6.60
  -5  11   5   29.00    5.50
   5  11  -5   28.10    6.90
   4 -11  -5   36.30    6.20
  -4 -11   5   34.80    6.60
  -4 -11   5   24.70    6.20
  -4  11   5   30.90    6.10
   4  11  -5   27.30    6.60
   3 -11  -5   65.59    7.00
  -3 -11   5   66.69    9.20
  -3 -11   5   66.79    9.10
   3  11  -5   73.09    9.50
  -3  11   5   59.89    8.00
  -2 -11   5  246.28   14.60
  -2 -11   5  236.98   13.80
   2 -11  -5  254.07   13.70
   2  11  -5  256.77   14.60
  -2  11   5  268.77   14.40
  -1 -11   5   11.40    4.70
  -1 -11   5    4.90    4.00
   1 -11  -5    3.90    3.10
  -1  11   5    7.40    3.70
   0 -11   5   46.70    7.30
   0 -11  -5   55.99    8.30
   0 -11   5   53.29    7.80
   0 -11  -5   59.29    7.60
   0  11   5   63.89    8.60
  -1 -11  -5  163.78   12.30
  -1 -11  -5  153.58   11.20
   1 -11   5  181.38   11.70
   1  11   5  149.69   11.20
  -2 -11  -5  572.44   23.70
   2 -11   5  553.34   21.50
  -2 -11  -5  574.64   22.30
   2  11   5  527.55   22.70
  -3 -11  -5   76.99    9.40
  -3 -11  -5   85.29   10.70
   3 -11   5   70.09    7.50
   3  11   5   71.09    9.60
  -4 -11  -5  130.69   10.60
   4 -11   5  130.29   13.00
  -4 -11  -5  136.79   11.70
   4  11   5  143.99   12.00
   5 -11   5   82.19   12.00
  -5 -11  -5  101.39    9.60
  -5 -11  -5   93.49   11.10
   5 -11   5   99.69   10.10
   5  11   5  103.89   10.40
   6 -11   5  434.16   17.80
  -6 -11  -5  454.15   19.90
   6 -11   5  409.66   24.10
  -6 -11  -5  440.06   20.70
   6 -11   5  472.35   18.70
   6  11   5  451.15   21.80
  -7 -11  -5   88.09    9.40
   7 -11   5   84.69    8.10
  -7 -11  -5  101.59   10.30
   7 -11   5   97.29    8.20
   7 -11   5   81.49   12.90
   7  11   5   69.29   10.50
  -8 -11  -5  351.66   18.30
  -8 -11  -5  375.36   20.00
   8 -11   5  374.66   15.40
   8 -11   5  372.06   15.70
  -8 -11  -5  371.66   17.90
   8  11   5  328.77   20.20
   9 -11   5    1.70    6.40
  -9 -11  -5   -1.70    3.70
  -9 -11  -5    1.30    4.80
  -9 -11  -5   -2.50    3.10
   9 -11   5    1.40    2.80
   9 -11   5   -0.40    3.10
   9  11   5    3.70    5.00
 -10 -11  -5   78.69    9.70
 -10 -11  -5   77.79    9.10
  10 -11   5   83.79    7.60
  10 -11   5   75.29   13.70
  10 -11   5   77.99    7.00
 -10 -11  -5   84.89   11.00
  10  11   5   74.49   11.70
  11 -11   5   -4.70    2.70
 -11 -11  -5   -2.60    3.20
 -11 -11  -5   -2.90    4.00
 -11 -11  -5    3.50    3.90
  11 -11   5    5.80    3.10
 -12 -11  -5  148.39   10.00
 -12 -11  -5  157.38   14.50
  12 -11   5  133.99    9.10
  12 -11   5  148.99    8.60
  13 -11   5    5.60    3.70
  13 -11   5   14.70    3.80
 -13 -11  -5    5.70    4.00
 -13 -11  -5   12.20    3.60
 -13 -11  -5   19.60    6.90
 -14 -12   5   16.10    7.20
  14 -12  -5   32.90    6.70
 -14 -12   5   25.00    6.70
  14  12  -5   27.90    9.20
  13 -12  -5   -3.10    3.60
 -13 -12   5    8.70    5.50
 -13 -12   5    0.00    2.00
 -13 -12   5   -3.40    5.50
  13  12  -5   -6.10    5.60
 -12 -12   5  178.38   13.90
  12 -12  -5  156.78   17.20
 -12 -12   5  170.28    9.50
 -12 -12   5  197.68   14.80
  12 -12  -5  184.58   12.20
  12  12  -5  197.88   18.30
  11 -12  -5   -4.20    3.20
 -11 -12   5    4.10    5.60
 -11 -12   5   17.00    6.30
 -11 -12   5    6.20    3.20
  11  12  -5   -5.50    4.90
  10 -12  -5   35.40    6.60
 -10 -12   5   19.20    6.50
 -10 -12   5   20.90    7.10
  10  12  -5    6.00    6.00
  -9 -12   5   -3.80    4.40
  -9 -12   5   -1.60    3.90
   9 -12  -5    4.10    3.90
   9  12  -5    6.30    5.90
   8 -12  -5  373.76   17.60
  -8 -12   5  399.46   20.40
  -8 -12   5  361.66   19.70
   8  12  -5  368.96   21.70
  -7 -12   5   34.00    7.80
  -7 -12   5   24.70    6.90
   7 -12  -5   29.10    5.90
   7  12  -5   29.10    8.10
   6 -12  -5   73.19    9.10
  -6 -12   5   81.59   10.70
  -6 -12   5   87.09   11.10
   6  12  -5   82.79   11.40
  -5 -12   5   -3.60    4.10
   5 -12  -5    0.90    3.50
  -5 -12   5    2.90    4.50
   5  12  -5    6.70    5.00
  -4 -12   5  338.37   18.10
  -4 -12   5  297.47   17.10
   4 -12  -5  331.17   16.30
   4  12  -5  337.07   18.70
  -4  12   5  322.97   16.30
  -3 -12   5   91.99   10.90
   3 -12  -5   88.09    8.80
  -3 -12   5   74.49   10.00
  -3  12   5   87.79    9.30
   3  12  -5   85.19   10.70
   2 -12  -5   65.09    8.40
  -2 -12   5   73.29    9.60
  -2 -12   5   63.29    8.90
  -2  12   5   68.89    9.00
  -1 -12   5   -0.80    3.60
  -1 -12   5    5.80    4.30
   1 -12  -5   12.40    4.80
  -1  12   5    1.60    3.80
   0 -12   5  551.64   22.80
   0 -12  -5  570.74   24.20
   0 -12   5  531.55   22.30
   0 -12  -5  554.34   22.30
   0  12   5  493.85   22.40
   1 -12   5   21.00    5.60
  -1 -12  -5    6.70    4.80
  -1 -12  -5   11.40    4.80
   1 -12   5    8.80    4.50
   1  12   5    8.30    4.20
   2 -12   5   79.59    9.70
   2 -12   5   60.69    8.40
  -2 -12  -5   58.29    9.30
  -2 -12  -5   65.59    8.40
   2  12   5   72.79    9.70
   3 -12   5    3.80    4.20
  -3 -12  -5    7.00    3.90
  -3 -12  -5    2.50    4.80
   3 -12   5   10.20    4.40
   3  12   5    3.80    4.90
   4 -12   5  140.69   10.60
   4 -12   5  140.39   10.40
  -4 -12  -5  145.29   11.60
   4 -12   5  111.99   12.70
  -4 -12  -5  137.99   12.30
   4  12   5  139.99   12.30
   5 -12   5   11.00    4.80
   5 -12   5    5.20    5.50
  -5 -12  -5   24.30    6.50
  -5 -12  -5   14.40    5.90
   5 -12   5   11.30    4.50
   5  12   5   22.10    6.30
   6 -12   5  178.98   11.60
  -6 -12  -5  170.88   13.20
   6 -12   5  176.38   11.40
  -6 -12  -5  162.58   13.20
   6  12   5  141.49   13.00
   7 -12   5   14.90    7.40
  -7 -12  -5   -2.00    4.00
  -7 -12  -5    0.10    5.40
   7 -12   5    5.90    3.80
   7 -12   5    6.40    3.80
   7  12   5   -7.50    4.70
   8 -12   5   94.29   14.60
  -8 -12  -5  109.99   10.90
  -8 -12  -5  114.69   10.90
   8 -12   5   99.69    8.60
   8 -12   5   97.59    8.90
   8  12   5  113.39   13.60
  -9 -12  -5   27.50    6.80
   9 -12   5   30.70    9.70
   9 -12   5   20.80    5.00
  -9 -12  -5   21.20    7.00
   9 -12   5   25.50    5.30
  -9 -12  -5   16.30    5.60
   9  12   5   24.60    7.40
  10 -12   5  313.47   15.30
 -10 -12  -5  322.47   17.80
 -10 -12  -5  328.27   17.00
  10 -12   5  382.56   22.30
 -10 -12  -5  321.67   19.80
 -11 -12  -5    1.60    4.10
 -11 -12  -5   -1.70    4.50
 -11 -12  -5    0.00    4.90
  11 -12   5    5.10    4.20
  12 -12   5   92.79    9.80
  12 -12   5  103.09    9.00
 -12 -12  -5  107.69    9.70
 -12 -12  -5  105.29   13.60
 -12 -12  -5  106.59    9.70
 -13 -13   5   18.70    6.20
 -13 -13   5    3.10    2.80
  13 -13  -5    9.90    5.10
  13  13  -5   17.90    8.60
 -12 -13   5   18.20    4.50
  12 -13  -5   16.70    5.50
 -12 -13   5   30.30    7.90
  12  13  -5   25.70    8.80
 -11 -13   5   -3.10    4.70
  11 -13  -5    0.80    4.00
  11  13  -5  -10.20    5.00
 -10 -13   5  346.27   20.60
 -10 -13   5  402.36   21.60
  10 -13  -5  412.96   18.60
  10  13  -5  392.26   24.20
   9 -13  -5    8.10    4.90
  -9 -13   5   19.50    6.90
  -9 -13   5   15.00    6.20
   9  13  -5   18.10    7.60
  -8 -13   5   19.90    8.00
  -8 -13   5   26.70    7.20
   8 -13  -5   22.80    6.10
   8  13  -5   21.80    7.90
  -7 -13   5    8.50    5.50
   7 -13  -5    5.20    4.20
  -7 -13   5    4.20    4.90
   7  13  -5    7.60    6.10
  -6 -13   5  343.77   19.60
  -6 -13   5  347.87   19.50
   6 -13  -5  348.97   17.30
   6  13  -5  340.17   19.90
   5 -13  -5    7.00    4.70
  -5 -13   5    2.40    5.10
  -5 -13   5   11.40    6.00
   5  13  -5    4.00    4.80
  -4 -13   5   11.10    5.80
  -4 -13   5    0.30    4.50
   4 -13  -5    6.80    4.80
   4  13  -5    4.90    5.50
  -3 -13   5    5.20    5.00
   3 -13  -5    9.80    4.80
  -3 -13   5    4.60    4.80
  -3  13   5    0.70    3.70
  -2 -13   5  246.88   15.80
   2 -13  -5  266.47   14.90
  -2 -13   5  257.67   15.50
  -2  13   5  252.27   15.50
   1 -13  -5    1.30    4.60
   1 -13  -5   -1.80    3.60
  -1 -13   5   -0.10    3.70
  -1 -13   5    4.20    3.60
  -1  13   5    9.20    5.10
   0 -13  -5   99.79   10.20
   0 -13  -5   75.59   10.90
   0 -13   5  100.39   10.40
   0 -13   5  118.09   10.80
   0  13   5  102.29   11.00
   1 -13   5   17.00    5.90
  -1 -13  -5   31.10    7.50
  -1 -13  -5   24.00    6.30
   1 -13   5   21.50    6.20
   1  13   5   25.90    7.20
   2 -13   5  110.79   10.40
  -2 -13  -5  103.09   10.50
   2 -13   5  101.39   10.30
  -2 -13  -5  110.89   13.10
   2  13   5  120.39   11.70
   3 -13   5   19.40    6.10
  -3 -13  -5   19.60    5.80
   3 -13   5   23.20    6.00
  -3 -13  -5   24.50    6.90
   3  13   5   26.10    7.00
  -4 -13  -5  153.58   12.50
  -4 -13  -5  174.18   14.10
   4 -13   5  152.48   11.70
   4 -13   5  162.98   12.40
   5 -13   5   64.09    8.60
   5 -13   5   46.50    7.80
  -5 -13  -5   58.59    9.00
  -5 -13  -5   63.59   10.40
   6 -13   5  243.18   14.10
   6 -13   5  217.38   13.70
  -6 -13  -5  277.37   16.40
  -6 -13  -5  256.87   17.00
   6  13   5  207.78   16.50
   7 -13   5    3.30    4.10
  -7 -13  -5   -3.70    4.50
  -7 -13  -5    1.50    4.60
   7 -13   5   -1.10    4.10
   7 -13   5    2.70    4.00
   7  13   5    1.60    5.40
  -8 -13  -5  198.68   15.40
  -8 -13  -5  175.78   13.50
   8 -13   5  220.38   19.60
   8 -13   5  221.28   12.80
   8 -13   5  195.68   12.70
   8  13   5  207.58   17.30
  -9 -13  -5   -2.50    4.30
  -9 -13  -5   11.40    6.40
   9 -13   5   -0.30    3.80
  -9 -13  -5   -6.10    3.80
   9 -13   5   -3.20    3.50
  10 -13   5   74.09    8.10
 -10 -13  -5   80.79   12.00
 -10 -13  -5   78.49   10.00
  10 -13   5   89.59    8.80
 -10 -13  -5   92.19   11.70
 -11 -13  -5   -0.90    4.80
 -11 -13  -5    1.30    4.30
 -11 -13  -5   11.10    5.90
  11 -13   5   11.30    4.30
  11 -13   5    4.60    4.30
  12 -14  -5  286.17   16.70
  12  14  -5  354.16   24.70
 -11 -14   5    8.90    7.30
  11 -14  -5    7.60    5.00
 -11 -14   5   23.10    7.90
  11  14  -5   20.40    8.40
 -10 -14   5   51.29   11.30
  10 -14  -5   85.99   10.40
  10  14  -5   81.69   13.60
  -9 -14   5   -9.30    4.20
   9 -14  -5    0.70    3.60
   9  14  -5    3.90    6.10
   8 -14  -5  471.55   21.40
  -8 -14   5  494.15   24.60
  -7 -14   5   35.30    8.20
   7 -14  -5   19.20    6.00
   7  14  -5    9.50    7.10
  -6 -14   5    4.70    5.40
   6 -14  -5    7.50    5.20
  -6 -14   5    8.20    5.80
   6  14  -5    6.80    5.00
   5 -14  -5   28.10    7.00
  -5 -14   5   24.90    7.40
   5  14  -5    9.80    6.50
   4 -14  -5 1068.49   35.30
  -4 -14   5 1014.20   36.90
   3 -14  -5    3.00    4.40
  -3 -14   5   -8.10    3.60
  -3 -14   5    3.80    5.20
   2 -14  -5   54.29    8.60
  -2 -14   5   44.70    8.60
  -2 -14   5   38.90    8.40
  -2  14   5   49.50    8.90
  -1 -14   5   -0.80    3.90
   1 -14  -5   -3.20    3.70
   1 -14  -5    7.60    5.10
  -1 -14   5    0.50    4.50
  -1  14   5    0.90    4.90
   0 -14   5  303.97   17.80
   0 -14  -5  310.57   17.10
   0 -14   5  306.97   18.10
   0  14   5  329.67   19.20
  -1 -14  -5   13.00    5.50
   1 -14   5    3.30    4.10
   1 -14   5   14.10    5.70
   1  14   5    6.90    5.20
   2 -14   5   80.19   10.60
  -2 -14  -5   84.39   11.80
   2 -14   5   95.59   10.30
  -2 -14  -5   60.49    8.90
   2  14   5   89.09   12.30
  -3 -14  -5   18.40    6.80
   3 -14   5   24.10    6.40
  -3 -14  -5   12.60    5.70
   3 -14   5    2.40    4.30
   4 -14   5  148.29   12.20
  -4 -14  -5  152.58   13.70
  -4 -14  -5  146.59   12.70
   4 -14   5  113.09   11.60
  -5 -14  -5   40.70    8.30
   5 -14   5   26.70    6.70
  -5 -14  -5   22.90    8.70
   5 -14   5   27.50    6.70
  -6 -14  -5  217.48   15.30
   6 -14   5  225.08   14.30
   6 -14   5  228.08   14.60
   7 -14   5    5.00    4.70
   7 -14   5   14.30    5.20
  -7 -14  -5    9.60    7.00
   7 -14   5    2.40    4.20
  -7 -14  -5    9.40    5.70
  -8 -14  -5  104.89   12.30
   8 -14   5   93.89   10.00
  -8 -14  -5  127.39   12.30
   8 -14   5   98.79    9.70
  -9 -14  -5    7.80    5.80
   9 -14   5    6.00    4.20
  -9 -14  -5   -0.70    4.70
   9 -14   5   -7.10    3.60
  -9 -14  -5   -4.60    4.00
  10 -14   5   79.59    9.60
 -10 -14  -5   76.99   11.00
  10 -14   5   95.39    9.20
 -10 -14  -5   88.59   12.40
 -11 -14  -5    7.40    5.10
  11 -14   5   -2.30    4.20
 -11 -14  -5    9.10    6.20
  11 -14   5    3.20    4.10
 -11 -14  -5  -12.00    6.40
  12 -15  -5    8.00    5.40
 -12 -15   5    2.90    5.80
 -12 -15   5    5.00    4.30
  12  15  -5    0.80    6.60
 -11 -15   5    0.50    6.20
  11 -15  -5    0.00    4.20
  11  15  -5   -5.90    6.00
  10 -15  -5  324.57   18.40
 -10 -15   5  281.27   19.70
  10  15  -5  395.86   25.40
  -9 -15   5  104.39   13.60
   9 -15  -5  105.79   11.10
   9  15  -5   92.09   14.50
  -8 -15   5   13.90    7.30
   8 -15  -5    3.10    4.70
  -8 -15   5   -4.50    6.70
   8  15  -5   15.20    7.60
  -7 -15   5    5.30    6.30
   7 -15  -5   11.30    5.50
   6 -15  -5  328.87   18.00
  -6 -15   5  324.67   19.90
   6  15  -5  318.87   21.10
  -5 -15   5    8.60    6.20
   5 -15  -5   17.70    6.50
  -4 -15   5   10.30    5.50
   4 -15  -5    9.70    5.40
   3 -15  -5    6.60    4.20
  -3 -15   5    3.40    5.10
   2 -15  -5  610.44   26.20
  -2 -15   5  622.84   27.40
   2 -15  -5  627.24   32.20
   1 -15  -5   59.99    9.60
  -1 -15   5   41.90    8.80
  -1 -15   5   50.59    8.60
   0 -15   5   18.30    6.60
   0 -15   5   24.30    7.30
   0 -15  -5   32.20    7.50
  -1 -15  -5  119.79   12.00
   1 -15   5  124.39   12.00
   1 -15   5  118.59   12.10
   1  15   5  128.59   13.30
   2 -15   5  286.17   17.30
   2 -15   5  286.57   17.60
  -2 -15  -5  252.77   16.90
   2  15   5  287.27   19.00
  -3 -15  -5    3.50    4.60
   3 -15   5   -2.40    4.00
   3 -15   5   -1.00    4.20
  -4 -15  -5  129.19   12.60
   4 -15   5  129.99   12.30
   4 -15   5  110.59   11.00
   5 -15   5   54.19    8.90
   5 -15   5   37.20    7.90
  -5 -15  -5   41.20    8.70
   6 -15   5  181.88   13.00
   6 -15   5  167.48   13.40
  -6 -15  -5  157.28   13.90
   7 -15   5    4.60    4.40
   7 -15   5   -4.50    4.10
  -7 -15  -5   -4.00    5.00
  -8 -15  -5   73.69   13.30
   8 -15   5  103.19   10.40
   8 -15   5   95.39   11.20
   9 -15   5    5.60    4.80
  -9 -15  -5    2.40    5.10
  -9 -15  -5   16.20    8.20
   9 -15   5   -1.10    4.80
  10 -15   5   78.29   10.10
 -10 -15  -5   57.59   12.60
  10 -15   5   77.69    9.80
  11 -16  -5    7.50    6.60
 -11 -16   5    9.70    6.80
  11  16  -5   -2.50    4.70
 -10 -16   5   10.40    7.60
  10 -16  -5   27.30    7.40
  10  16  -5   15.20    8.30
  -9 -16   5   18.60    7.90
   9 -16  -5   15.90    6.70
   9  16  -5    3.40    5.40
   8 -16  -5  218.18   15.40
  -8 -16   5  211.68   17.70
   8  16  -5  226.68   19.50
  -7 -16   5    3.60    6.20
   7 -16  -5   -0.30    4.20
   6 -16  -5   14.10    5.90
  -6 -16   5    9.20    5.80
   5 -16  -5   26.40    7.00
  -4 -16   5  234.58   19.50
   4 -16  -5  260.57   16.90
  -3 -16   5    9.40    5.50
   3 -16  -5    2.40    5.60
   3 -16  -5    0.40    4.50
   2 -16  -5   13.80    6.00
  -2 -16   5   15.30    6.10
  -2 -16   5   18.10    6.50
   2 -16  -5    9.20    7.00
  -1 -16   5   23.00    7.50
  -1 -16   5   30.90    8.30
   1 -16  -5   20.90    6.90
   0 -16  -5  472.25   23.70
   0 -16   5  531.95   25.20
   0 -16   5  449.76   24.00
   1 -16   5    6.60    6.30
   1 -16   5   22.70    7.10
  -1 -16  -5   15.20    5.90
   2 -16   5   29.50    8.30
   2 -16   5   36.50    8.90
  -2 -16  -5   38.60    8.70
  -3 -16  -5   -0.60    4.10
   3 -16   5    3.30    4.40
   4 -16   5  176.78   23.80
   4 -16   5  199.58   14.70
  -4 -16  -5  192.98   17.40
   5 -16   5   -2.10    3.90
  -5 -16  -5   -1.20    4.70
   5 -16   5    3.00    5.70
  -6 -16  -5  229.18   17.00
   6 -16   5  251.67   16.30
   6 -16   5  196.58   16.30
   7 -16   5   10.40    5.70
  -7 -16  -5    0.80    5.10
   7 -16   5   -1.20    5.20
  -8 -16  -5  124.69   13.20
   8 -16   5  111.79   11.60
   8 -16   5  126.39   16.10
   9 -16   5   15.90    7.40
  -9 -16  -5    1.30    5.70
   9 -16   5   10.80    5.00
 -10 -17   5  144.59   15.50
  10 -17  -5  110.09   13.40
  -9 -17   5    4.70    6.40
   9 -17  -5   14.20    7.80
  -8 -17   5   16.50    7.80
  -7 -17   5    6.60    6.60
  -6 -17   5   89.89   12.50
  -5 -17   5   -0.20    5.30
  -4 -17   5    6.30    4.90
  -3 -17   5   88.89   12.70
  -2 -17   5  125.19   17.90
   0 -17   5    8.60    6.80
   0 -17  -5   14.90    6.60
   0 -17   5   10.30    6.40
  -1 -17  -5    4.80    5.10
   1 -17   5    1.80    5.30
   1 -17   5    3.10    5.70
  -2 -17  -5  270.17   18.60
   2 -17   5  288.97   19.40
   2 -17   5  286.17   18.50
   3 -17   5   25.20    7.60
   3 -17   5    3.70    5.80
  -3 -17  -5   24.80    7.80
  -4 -17  -5   67.19   11.40
   4 -17   5   66.39   10.60
   4 -17   5   86.99   12.30
   5 -17   5   58.89   10.40
   5 -17   5   57.79   10.40
  -5 -17  -5   71.59   11.20
   6 -17   5   86.69   12.40
   6 -17   5  106.59   11.60
  -6 -17  -5   84.29   12.40
   7 -17   5   -7.20    6.10
   7 -17   5   -1.50    4.40
  -7 -17  -5    6.20    6.00
  -8 -17  -5   42.00    9.60
   8 -17   5   41.60    9.20
   8 -17   5   57.69    9.60
  -8 -18   5   78.09   13.10
   8 -18  -5  128.59   13.20
  -7 -18   5   11.40    7.20
   7 -18  -5   12.90    6.30
  -6 -18   5   19.50    8.10
   6 -18  -5    6.90    6.30
  -5 -18   5   29.80    7.80
   5 -18  -5   39.10    8.90
   4 -18  -5  141.09   13.70
  -4 -18   5  146.29   15.10
  -3 -18   5   -9.80    3.80
   3 -18  -5   -0.70    5.60
  -2 -18   5   60.49   11.10
   2 -18  -5   58.69   10.30
  -1 -18   5   30.50    8.70
   1 -18  -5   19.00    5.90
   0 -18  -5  157.18   13.90
   0 -18   5  191.68   16.30
   1 -18   5   12.70    6.50
  -1 -18  -5    1.50    5.50
  -2 -18  -5   20.20    7.70
   2 -18   5   25.80    8.00
  -3 -18  -5   44.40   10.20
   3 -18   5   42.90   10.70
  -4 -18  -5  130.49   15.70
  -5 -18  -5    2.10    5.80
  -6 -18  -5   62.59   10.90
  -7 -18  -5   50.69   10.20
  -7 -19   5   19.00    8.50
  -6 -19   5   47.90   10.50
   6 -19  -5   84.19   12.10
   5 -19  -5   10.30    6.50
  -5 -19   5   13.00    8.40
   4 -19  -5    7.00    6.00
  -4 -19   5   11.90    7.30
   3 -19  -5   29.00    8.50
  -3 -19   5   21.00    8.10
  -2 -19   5  138.29   16.70
   2 -19  -5  141.19   14.30
   1 -19  -5    2.70    5.60
  -1 -19   5   18.50    7.70
   0 -19   5   20.40    8.40
   0 -19  -5   26.50    8.00
   1 -19   5   51.99   10.80
  -1 -19  -5   49.50    9.50
  -2 -19  -5  144.99   14.90
   2 -19   5  149.19   15.60
   3 -19   5   24.60    7.40
  -3 -19  -5   15.80    7.50
  -4 -19  -5   16.20    7.50
   4 -19   5   22.70    7.70
  -5 -19  -5   48.10   11.00
   5 -19   5   59.99   11.30
  -4 -20   5   68.99   12.40
   4 -20  -5   82.49   12.80
  -3 -20   5    9.10    7.20
   3 -20  -5   14.30    7.20
   2 -20  -5   19.80    7.90
  -2 -20   5   12.20    7.40
  -1 -20   5   38.70   10.00
   1 -20  -5   35.10    9.50
   0 -20   5  183.38   17.40
   0 -20  -5  147.79   16.00
   1 -20   5   16.10    8.10
  -1 -20  -5   14.80    7.60
   2 -20   5    1.40    5.70
  -2 -20  -5    2.80    5.90
  17   0  -6   -2.10    4.00
  16   0  -6  223.38   15.40
  15   0  -6   -3.40    3.70
  14   0  -6   58.99    5.20
  14   0  -6   73.69    9.60
  13   0  -6   -3.00    3.20
  13   0  -6   -2.40    1.70
  12   0  -6  383.66   13.30
  12   0  -6  392.46   17.20
  11   0  -6   -1.80    2.70
 -11   0   6    0.50    0.80
  11   0  -6    1.60    1.70
 -10   0   6  961.30   22.70
 -10   0   6  898.11   22.80
  10   0  -6  927.61   28.00
  10   0  -6  896.01   23.50
  -9   0   6    0.70    1.70
   9   0  -6    2.40    2.60
   9   0  -6   -1.00    1.30
   8   0  -6   12.80    2.20
  -8   0   6   10.20    2.60
   8   0  -6    8.70    3.10
  -7   0   6    2.20    1.90
   7   0  -6    0.90    1.90
   7   0  -6    1.70    1.20
   6   0  -6 6151.98  193.88
   5   0  -6    0.80    1.60
  -5   0   6   -2.50    1.10
   4   0  -6   42.80    4.00
  -4   0   6   42.50    3.70
  -3   0   6    1.40    1.50
   3   0  -6    0.20    1.20
   2   0  -6 1451.35   33.90
  -2   0   6 1472.85   34.50
   2   0  -6 1506.45   34.90
  -1   0   6    0.00    1.50
   1   0  -6   -0.30    1.50
  -1   0   6    0.00    1.50
   1   0  -6   -2.80    1.20
   0   0  -6  389.86   13.30
   0   0   6  404.26   13.30
   0   0   6  400.76   12.10
   0   0  -6  393.46   11.90
  -1   0  -6    1.00    1.10
  -1   0  -6   -0.50    1.70
   1   0   6    0.40    1.70
   1   0   6   -0.90    1.10
  -2   0  -6  416.46   11.10
   2   0   6  441.66   15.60
   2   0   6  436.86   12.20
  -2   0  -6  412.76   15.40
  -3   0  -6    1.30    2.10
   3   0   6    1.40    2.70
   3   0   6   -0.60    1.10
  -3   0  -6    0.60    0.60
   4   0   6  316.57    9.50
  -4   0  -6  317.27   14.40
   4   0   6  302.37   14.00
   5   0   6    1.20    1.40
   5   0   6    2.40    2.80
  -5   0  -6   -0.60    3.00
   6   0   6 1665.13   45.80
  -6   0  -6 1601.04   46.80
   6   0   6 1746.23   37.20
   7   0   6    0.30    1.30
   7   0   6    1.60    1.60
   7   0   6    0.50    2.90
  -7   0  -6   -0.10    3.10
  -8   0  -6   43.00    7.50
   8   0   6   32.10    3.30
   8   0   6   28.80    3.70
   8   0   6   31.50    6.80
   9   0   6   -3.60    3.60
  -9   0  -6    8.40    5.00
   9   0   6   -0.30    1.90
   9   0   6    0.00    1.80
 -10   0  -6  407.16   20.90
  10   0   6  402.36   13.10
  10   0   6  401.26   14.00
  10   0   6  409.46   20.50
  11   0   6    0.70    2.40
  11   0   6   -3.20    4.00
 -11   0  -6   -4.00    4.10
  11   0   6    1.70    2.20
  12   0   6  188.68    9.50
  12   0   6  203.88   15.30
 -12   0  -6  206.28   15.90
  12   0   6  191.78   10.10
  13   0   6   -5.50    4.80
  13   0   6    1.90    2.90
  13   0   6    4.60    3.10
 -13   0  -6   -2.30    4.20
  14   0   6  252.47   18.20
  14   0   6  256.27   12.90
  17  -1  -6   -8.50    3.90
  17   1  -6    1.00    5.20
  16  -1  -6    3.90    4.30
  16  -1  -6    4.20    2.70
  16   1  -6    2.50    4.40
  15  -1  -6   21.10    4.70
  15  -1  -6    6.30    4.80
  15   1  -6    1.00    4.80
  14  -1  -6  428.26   19.00
  14   1  -6  419.46   19.70
  13  -1  -6    6.00    4.00
  13  -1  -6    7.10    3.00
  13   1  -6    8.60    4.10
  12  -1  -6  158.18    9.00
  12  -1  -6  175.38   10.90
  12   1  -6  153.18   10.80
  11  -1  -6    3.90    2.40
  11  -1  -6   -2.10    2.90
 -11  -1   6    4.40    1.90
 -11  -1   6    2.60    1.70
  11   1  -6    3.10    3.30
  10  -1  -6  872.21   24.80
 -10  -1   6  946.51   23.50
  10  -1  -6  969.70   27.50
 -10  -1   6  900.21   23.80
 -10   1   6  897.01   20.70
 -10   1   6  881.31   20.80
  10   1  -6  889.71   21.20
  -9  -1   6  181.48    8.20
   9  -1  -6  182.18    9.80
   9  -1  -6  182.98    8.60
  -9   1   6  202.78    7.50
   9   1  -6  201.38   10.80
   9   1  -6  178.88    6.60
  -8  -1   6  585.44   17.30
   8  -1  -6  599.94   18.90
   8  -1  -6  572.44   17.00
  -8   1   6  582.74   16.40
   8   1  -6  558.94   13.20
   8   1  -6  588.94   19.70
  -7  -1   6   63.29    5.00
   7  -1  -6   63.99    5.40
  -7   1   6   65.79    4.70
   7   1  -6   59.99    2.10
   7   1  -6   59.29    5.60
   6  -1  -6  859.11   23.40
  -6  -1   6  827.92   22.60
   6   1  -6  840.32   24.10
  -6   1   6  819.62   22.00
   5  -1  -6    9.50    2.60
  -5  -1   6   11.00    2.50
   5   1  -6    8.70    2.60
   5   1  -6   10.20    1.10
  -5   1   6    7.50    2.20
   4  -1  -6 1846.62   41.80
  -4  -1   6 1818.52   41.60
  -4   1   6 1796.32   41.10
   4   1  -6 1710.83   37.80
   4   1  -6 1749.53   42.00
  -3  -1   6  303.97   10.80
   3  -1  -6  299.77   10.80
  -3   1   6  318.27   10.80
   3   1  -6  310.27    9.30
   3   1  -6  311.77   11.20
  -2  -1   6 2021.90   45.10
   2  -1  -6 1974.60   45.10
  -2  -1   6 2047.10   43.90
   2   1  -6 1967.20   45.20
  -2   1   6 2017.90   45.10
   2   1  -6 1960.00   44.20
  -1  -1   6 1719.93   39.40
   1  -1  -6 1758.32   39.60
  -1  -1   6 1776.02   39.80
   1   1  -6 1692.03   39.30
  -1   1   6 1710.83   39.50
   1   1  -6 1729.43   40.10
   0  -1   6 1500.85   34.80
   0  -1  -6 1403.66   32.80
   0  -1  -6 1350.46   34.30
   0  -1   6 1457.75   32.70
   0   1   6 1385.56   32.80
   0   1  -6 1367.26   34.50
   0   1  -6 1406.96   32.30
  -1  -1  -6   79.09    4.50
   1  -1   6   87.19    6.10
   1  -1   6   82.19    4.50
  -1  -1  -6   81.29    5.90
  -1   1  -6   78.29    4.00
  -1   1  -6   80.99    6.10
   1   1   6   83.79    4.70
   1   1   6   80.29    5.70
  -2  -1  -6  433.96   15.80
   2  -1   6  474.55   16.50
  -2  -1  -6  426.86   12.30
   2  -1   6  455.15   12.40
  -2   1  -6  441.96   11.00
  -2   1  -6  463.15   16.50
   2   1   6  445.36   15.70
   2   1   6  449.56   13.00
  -3  -1  -6    3.30    1.40
   3  -1   6    1.10    4.50
  -3  -1  -6    4.00    2.40
   3  -1   6    4.50    1.40
[truncated: 902,958 more chars]
