# Supplementary material for: Triboluminescence of Centrosymmetric Lanthanide β-Diketonate Complexes with Aggregation-Induced Emission
Source: Molecules. 2019 Feb 13;24(4):662. doi: 10.3390/molecules24040662 (PMC6412301; doi:10.3390/molecules24040662)
Supplement: Supplementary file 1 [file molecules-24-00662-s001.zip › SI-Molecules/[Eu(pp-dbm-Cl2)3phen].cif]

  
data_WHY1809 
  
_audit_creation_method            SHELXL-97 
_chemical_name_systematic 
; 
 ? 
; 
_chemical_name_common             ? 
_chemical_melting_point           ? 
_chemical_formula_moiety          
 'C57 H35 Cl6 Eu N2 O6' 
_chemical_formula_sum 
 'C57 H35 Cl6 Eu N2 O6' 
_chemical_formula_weight          1208.53 
  
loop_ 
 _atom_type_symbol 
 _atom_type_description 
 _atom_type_scat_dispersion_real 
 _atom_type_scat_dispersion_imag 
 _atom_type_scat_source 
 'C'  'C'   0.0033   0.0016 
 'International Tables Vol C Tables 4.2.6.8 and 6.1.1.4' 
 'H'  'H'   0.0000   0.0000 
 'International Tables Vol C Tables 4.2.6.8 and 6.1.1.4' 
 'N'  'N'   0.0061   0.0033 
 'International Tables Vol C Tables 4.2.6.8 and 6.1.1.4' 
 'O'  'O'   0.0106   0.0060 
 'International Tables Vol C Tables 4.2.6.8 and 6.1.1.4' 
 'Cl'  'Cl'   0.1484   0.1585 
 'International Tables Vol C Tables 4.2.6.8 and 6.1.1.4' 
 'Eu'  'Eu'  -0.1578   3.6682 
 'International Tables Vol C Tables 4.2.6.8 and 6.1.1.4' 
  
_symmetry_cell_setting            Monoclinic 
_symmetry_space_group_name_H-M    'P 21/n'
_symmetry_space_group_name_Hall   '-P 2yn' 
  
loop_ 
 _symmetry_equiv_pos_as_xyz 
 'x, y, z' 
 '-x+1/2, y+1/2, -z+1/2' 
 '-x, -y, -z' 
 'x-1/2, -y-1/2, z-1/2' 
  
_cell_length_a                    14.2025(42) 
_cell_length_b                    18.3534(52) 
_cell_length_c                    20.3471(58) 
_cell_angle_alpha                 90.00 
_cell_angle_beta                  93.6564(82) 
_cell_angle_gamma                 90.00 
_cell_volume                      5293(3) 
_cell_formula_units_Z             4 
_cell_measurement_temperature     296(2) 
_cell_measurement_reflns_used     9672 
_cell_measurement_theta_min       2.29 
_cell_measurement_theta_max       27.54 
  
_exptl_crystal_description        Block 
_exptl_crystal_colour             yellow 
_exptl_crystal_size_max           0.28 
_exptl_crystal_size_mid           0.28 
_exptl_crystal_size_min           0.20 
_exptl_crystal_density_meas       . 
_exptl_crystal_density_diffrn     1.517 
_exptl_crystal_density_method     'not measured' 
_exptl_crystal_F_000              2416 
_exptl_absorpt_coefficient_mu     1.540 
_exptl_absorpt_correction_type    multi-scan 
_exptl_absorpt_correction_T_min   0.6723 
_exptl_absorpt_correction_T_max   0.7482 
_exptl_absorpt_process_details    'SAINT ver 8.34A; BRUKER SADABS' 
  
_exptl_special_details 
; 
 ? 
; 
  
_diffrn_ambient_temperature       296(2) 
_diffrn_radiation_wavelength      0.71073 
_diffrn_radiation_type            MoK\a 
_diffrn_radiation_source          'micro-focus sealed tube' 
_diffrn_radiation_monochromator   graphite 
_diffrn_measurement_device_type   'Photon-100 CMOS area detector' 
_diffrn_measurement_method        'phi and omega scans' 
_diffrn_reflns_number             117171 
_diffrn_reflns_av_R_equivalents   0.0352 
_diffrn_reflns_av_sigmaI/netI     0.0187 
_diffrn_reflns_limit_h_min        -18 
_diffrn_reflns_limit_h_max        18 
_diffrn_reflns_limit_k_min        -23 
_diffrn_reflns_limit_k_max        23 
_diffrn_reflns_limit_l_min        -25 
_diffrn_reflns_limit_l_max        26 
_diffrn_reflns_theta_min          2.44 
_diffrn_reflns_theta_max          27.87 
_reflns_number_total              12234 
_reflns_number_gt                 10214 
_reflns_threshold_expression      >2sigma(I) 
  
_computing_data_collection        'Bruker APEX3' 
_computing_cell_refinement        'Bruker APEX3' 
_computing_data_reduction         'Bruker SAINT' 
_computing_structure_solution     'SHELXS-97 (Sheldrick, 1990)' 
_computing_structure_refinement   'SHELXL-97 (Sheldrick, 1997)' 
_computing_molecular_graphics     'Bruker SHELXTL' 
_computing_publication_material   'Bruker SHELXTL' 
  
_refine_special_details 
; 
 Refinement of F^2^ against ALL reflections.  The weighted R-factor wR and 
 goodness of fit S are based on F^2^, conventional R-factors R are based 
 on F, with F set to zero for negative F^2^. The threshold expression of 
 F^2^ > 2sigma(F^2^) is used only for calculating R-factors(gt) etc. and is 
 not relevant to the choice of reflections for refinement.  R-factors based 
 on F^2^ are statistically about twice as large as those based on F, and R- 
 factors based on ALL data will be even larger. 
; 
  
_refine_ls_structure_factor_coef  Fsqd 
_refine_ls_matrix_type            full 
_refine_ls_weighting_scheme       calc 
_refine_ls_weighting_details 
 'calc w=1/[\s^2^(Fo^2^)+(0.0233P)^2^+3.2656P] where P=(Fo^2^+2Fc^2^)/3' 
_atom_sites_solution_primary      direct 
_atom_sites_solution_secondary    difmap 
_atom_sites_solution_hydrogens    geom 
_refine_ls_hydrogen_treatment     constr 
_refine_ls_extinction_method      SHELXL 
_refine_ls_extinction_coef        0.00237(12) 
_refine_ls_extinction_expression 
 'Fc^*^=kFc[1+0.001xFc^2^\l^3^/sin(2\q)]^-1/4^' 
_refine_ls_number_reflns          12234 
_refine_ls_number_parameters      650 
_refine_ls_number_restraints      0 
_refine_ls_R_factor_all           0.0369 
_refine_ls_R_factor_gt            0.0258 
_refine_ls_wR_factor_ref          0.0628 
_refine_ls_wR_factor_gt           0.0568 
_refine_ls_goodness_of_fit_ref    1.029 
_refine_ls_restrained_S_all       1.029 
_refine_ls_shift/su_max           0.001 
_refine_ls_shift/su_mean          0.000 
  
loop_ 
 _atom_site_label 
 _atom_site_type_symbol 
 _atom_site_fract_x 
 _atom_site_fract_y 
 _atom_site_fract_z 
 _atom_site_U_iso_or_equiv 
 _atom_site_adp_type 
 _atom_site_occupancy 
 _atom_site_symmetry_multiplicity 
 _atom_site_calc_flag 
 _atom_site_refinement_flags 
 _atom_site_disorder_assembly 
 _atom_site_disorder_group 
Eu1 Eu 0.134212(7) 0.570693(5) 0.204664(5) 0.03954(5) Uani 1 1 d . . . 
O1 O 0.07432(11) 0.60966(9) 0.30270(8) 0.0540(4) Uani 1 1 d . . . 
O2 O 0.25265(11) 0.63541(9) 0.26682(8) 0.0560(4) Uani 1 1 d . . . 
C1 C 0.11204(16) 0.61300(12) 0.36074(11) 0.0478(5) Uani 1 1 d . . . 
C2 C 0.20811(17) 0.62450(14) 0.37545(12) 0.0572(6) Uani 1 1 d . . . 
H2A H 0.2302 0.6240 0.4195 0.069 Uiso 1 1 calc R . . 
C3 C 0.27302(16) 0.63664(12) 0.32807(11) 0.0487(5) Uani 1 1 d . . . 
C4 C 0.04582(16) 0.60439(12) 0.41439(11) 0.0495(5) Uani 1 1 d . . . 
C5 C -0.0442(2) 0.58069(19) 0.39793(15) 0.0798(9) Uani 1 1 d . . . 
H5A H -0.0621 0.5712 0.3540 0.096 Uiso 1 1 calc R . . 
C6 C -0.1090(2) 0.5706(2) 0.44499(16) 0.0854(10) Uani 1 1 d . . . 
H6A H -0.1699 0.5548 0.4328 0.102 Uiso 1 1 calc R . . 
Cl1 Cl -0.16325(6) 0.57029(5) 0.56888(4) 0.0843(2) Uani 1 1 d . . . 
C7 C -0.08281(18) 0.58406(14) 0.50917(13) 0.0592(6) Uani 1 1 d . . . 
C8 C 0.0052(2) 0.60711(18) 0.52704(14) 0.0740(8) Uani 1 1 d . . . 
H8A H 0.0225 0.6162 0.5711 0.089 Uiso 1 1 calc R . . 
C9 C 0.06981(19) 0.61719(17) 0.47987(13) 0.0690(7) Uani 1 1 d . . . 
H9A H 0.1305 0.6329 0.4926 0.083 Uiso 1 1 calc R . . 
C10 C 0.37434(16) 0.65229(13) 0.34825(12) 0.0522(5) Uani 1 1 d . . . 
C11 C 0.4393(2) 0.6480(2) 0.30139(15) 0.0827(10) Uani 1 1 d . . . 
H11A H 0.4193 0.6358 0.2584 0.099 Uiso 1 1 calc R . . 
C12 C 0.5340(2) 0.6613(2) 0.31663(17) 0.1002(12) Uani 1 1 d . . . 
H12A H 0.5772 0.6579 0.2843 0.120 Uiso 1 1 calc R . . 
C13 C 0.56314(19) 0.67944(18) 0.37929(16) 0.0767(8) Uani 1 1 d . . . 
Cl2 Cl 0.68281(6) 0.69440(7) 0.39866(6) 0.1211(4) Uani 1 1 d . . . 
C14 C 0.5018(2) 0.6835(2) 0.42666(17) 0.1006(12) Uani 1 1 d . . . 
H14A H 0.5228 0.6950 0.4697 0.121 Uiso 1 1 calc R . . 
C15 C 0.4068(2) 0.6704(2) 0.41092(15) 0.0909(11) Uani 1 1 d . . . 
H15A H 0.3642 0.6740 0.4437 0.109 Uiso 1 1 calc R . . 
O3 O 0.08300(10) 0.68205(8) 0.15711(8) 0.0488(4) Uani 1 1 d . . . 
O4 O 0.23536(10) 0.60378(8) 0.12424(8) 0.0486(4) Uani 1 1 d . . . 
C16 C 0.12008(14) 0.73226(11) 0.12515(10) 0.0409(4) Uani 1 1 d . . . 
C17 C 0.20790(14) 0.72653(11) 0.09774(11) 0.0449(5) Uani 1 1 d . . . 
H17A H 0.2332 0.7679 0.0792 0.054 Uiso 1 1 calc R . . 
C18 C 0.25921(14) 0.66181(11) 0.09687(10) 0.0402(4) Uani 1 1 d . . . 
C19 C 0.06107(15) 0.79914(12) 0.11349(10) 0.0445(5) Uani 1 1 d . . . 
C20 C 0.09816(18) 0.86704(13) 0.10081(14) 0.0640(7) Uani 1 1 d . . . 
H20A H 0.1632 0.8726 0.1000 0.077 Uiso 1 1 calc R . . 
C21 C 0.0405(2) 0.92656(15) 0.08931(19) 0.0853(10) Uani 1 1 d . . . 
H21A H 0.0664 0.9721 0.0815 0.102 Uiso 1 1 calc R . . 
C22 C -0.0548(2) 0.91813(16) 0.08955(18) 0.0815(9) Uani 1 1 d . . . 
Cl3 Cl -0.12894(9) 0.99218(6) 0.07283(8) 0.1557(6) Uani 1 1 d . . . 
C23 C -0.09408(19) 0.85206(17) 0.10259(15) 0.0734(8) Uani 1 1 d . . . 
H23A H -0.1592 0.8470 0.1027 0.088 Uiso 1 1 calc R . . 
C24 C -0.03579(16) 0.79307(14) 0.11557(13) 0.0573(6) Uani 1 1 d . . . 
H24A H -0.0620 0.7484 0.1259 0.069 Uiso 1 1 calc R . . 
C25 C 0.34722(14) 0.65578(12) 0.06025(10) 0.0431(5) Uani 1 1 d . . . 
C26 C 0.37427(16) 0.70643(14) 0.01439(12) 0.0539(5) Uani 1 1 d . . . 
H26A H 0.3371 0.7473 0.0054 0.065 Uiso 1 1 calc R . . 
C27 C 0.45611(19) 0.69658(16) -0.01801(13) 0.0660(7) Uani 1 1 d . . . 
H27A H 0.4733 0.7303 -0.0492 0.079 Uiso 1 1 calc R . . 
C28 C 0.51134(18) 0.63711(17) -0.00383(13) 0.0659(7) Uani 1 1 d . . . 
Cl4 Cl 0.61483(6) 0.62482(6) -0.04357(5) 0.1073(3) Uani 1 1 d . . . 
C29 C 0.48656(19) 0.58575(15) 0.04121(14) 0.0655(7) Uani 1 1 d . . . 
H29A H 0.5246 0.5453 0.0503 0.079 Uiso 1 1 calc R . . 
C30 C 0.40444(17) 0.59536(13) 0.07261(12) 0.0534(6) Uani 1 1 d . . . 
H30A H 0.3869 0.5606 0.1028 0.064 Uiso 1 1 calc R . . 
O5 O 0.07364(11) 0.46438(9) 0.24965(8) 0.0546(4) Uani 1 1 d . . . 
O6 O 0.25338(11) 0.48356(8) 0.21710(9) 0.0556(4) Uani 1 1 d . . . 
C31 C 0.09856(15) 0.39946(12) 0.26039(10) 0.0459(5) Uani 1 1 d . . . 
C32 C 0.18824(16) 0.37242(13) 0.24993(12) 0.0528(5) Uani 1 1 d . . . 
H32A H 0.1999 0.3231 0.2569 0.063 Uiso 1 1 calc R . . 
C33 C 0.26124(15) 0.41623(12) 0.22948(11) 0.0456(5) Uani 1 1 d . . . 
C34 C 0.02430(15) 0.35190(12) 0.28728(11) 0.0465(5) Uani 1 1 d . . . 
C35 C -0.06752(17) 0.37729(14) 0.28450(14) 0.0626(7) Uani 1 1 d . . . 
H35A H -0.0814 0.4217 0.2641 0.075 Uiso 1 1 calc R . . 
C36 C -0.13915(17) 0.33862(16) 0.31117(15) 0.0696(8) Uani 1 1 d . . . 
H36A H -0.2007 0.3563 0.3086 0.084 Uiso 1 1 calc R . . 
C37 C -0.11734(16) 0.27345(14) 0.34158(13) 0.0589(6) Uani 1 1 d . . . 
Cl5 Cl -0.20442(6) 0.22531(5) 0.37958(6) 0.1018(3) Uani 1 1 d . . . 
C38 C -0.02758(17) 0.24652(14) 0.34478(14) 0.0628(7) Uani 1 1 d . . . 
H38A H -0.0141 0.2021 0.3652 0.075 Uiso 1 1 calc R . . 
C39 C 0.04293(16) 0.28574(13) 0.31740(13) 0.0566(6) Uani 1 1 d . . . 
H39A H 0.1040 0.2673 0.3193 0.068 Uiso 1 1 calc R . . 
C40 C 0.35733(15) 0.38501(12) 0.22250(11) 0.0471(5) Uani 1 1 d . . . 
C41 C 0.37434(17) 0.31168(13) 0.21361(12) 0.0546(6) Uani 1 1 d . . . 
H41A H 0.3244 0.2789 0.2128 0.065 Uiso 1 1 calc R . . 
C42 C 0.46473(19) 0.28636(15) 0.20597(13) 0.0631(6) Uani 1 1 d . . . 
H42A H 0.4753 0.2370 0.1993 0.076 Uiso 1 1 calc R . . 
C43 C 0.53800(18) 0.33426(16) 0.20825(14) 0.0656(7) Uani 1 1 d . . . 
Cl6 Cl 0.65147(6) 0.30190(6) 0.19855(5) 0.1049(3) Uani 1 1 d . . . 
C44 C 0.52369(19) 0.40696(17) 0.21844(18) 0.0783(9) Uani 1 1 d . . . 
H44A H 0.5745 0.4391 0.2209 0.094 Uiso 1 1 calc R . . 
C45 C 0.43370(18) 0.43215(14) 0.22498(16) 0.0676(7) Uani 1 1 d . . . 
H45A H 0.4238 0.4817 0.2312 0.081 Uiso 1 1 calc R . . 
N1 N -0.04685(13) 0.55868(11) 0.17394(10) 0.0546(5) Uani 1 1 d . . . 
C46 C -0.10958(18) 0.59256(17) 0.20777(15) 0.0704(7) Uani 1 1 d . . . 
H46A H -0.0894 0.6305 0.2355 0.085 Uiso 1 1 calc R . . 
C47 C -0.2055(2) 0.5740(2) 0.2039(2) 0.0957(11) Uani 1 1 d . . . 
H47A H -0.2480 0.5985 0.2288 0.115 Uiso 1 1 calc R . . 
C48 C -0.2349(2) 0.5191(3) 0.1627(2) 0.1021(13) Uani 1 1 d . . . 
H48A H -0.2983 0.5060 0.1594 0.123 Uiso 1 1 calc R . . 
C49 C -0.1718(2) 0.4825(2) 0.12543(15) 0.0793(9) Uani 1 1 d . . . 
C50 C -0.1980(3) 0.4245(2) 0.0811(2) 0.1067(14) Uani 1 1 d . . . 
H50A H -0.2606 0.4095 0.0767 0.128 Uiso 1 1 calc R . . 
C51 C -0.1349(3) 0.3919(2) 0.04640(19) 0.1052(13) Uani 1 1 d . . . 
H51A H -0.1547 0.3547 0.0177 0.126 Uiso 1 1 calc R . . 
C52 C -0.0374(2) 0.41164(18) 0.05122(15) 0.0781(9) Uani 1 1 d . . . 
C53 C 0.0314(3) 0.38032(19) 0.01463(16) 0.0951(11) Uani 1 1 d . . . 
H53A H 0.0147 0.3441 -0.0159 0.114 Uiso 1 1 calc R . . 
C54 C 0.1220(3) 0.40178(19) 0.02277(16) 0.0873(9) Uani 1 1 d . . . 
H54A H 0.1680 0.3807 -0.0017 0.105 Uiso 1 1 calc R . . 
C55 C 0.1456(2) 0.45627(16) 0.06860(14) 0.0687(7) Uani 1 1 d . . . 
H55A H 0.2084 0.4705 0.0745 0.082 Uiso 1 1 calc R . . 
N2 N 0.08330(14) 0.48871(11) 0.10409(9) 0.0530(5) Uani 1 1 d . . . 
C56 C -0.00845(18) 0.46763(14) 0.09571(12) 0.0575(6) Uani 1 1 d . . . 
C57 C -0.07644(17) 0.50397(14) 0.13288(12) 0.0575(6) Uani 1 1 d . . . 
  
loop_ 
 _atom_site_aniso_label 
 _atom_site_aniso_U_11 
 _atom_site_aniso_U_22 
 _atom_site_aniso_U_33 
 _atom_site_aniso_U_23 
 _atom_site_aniso_U_13 
 _atom_site_aniso_U_12 
Eu1 0.03811(6) 0.03861(6) 0.04214(7) 0.00308(4) 0.00439(4) -0.00484(4) 
O1 0.0472(8) 0.0661(10) 0.0491(9) -0.0058(8) 0.0062(7) -0.0046(7) 
O2 0.0503(9) 0.0708(11) 0.0471(9) -0.0021(8) 0.0048(7) -0.0184(8) 
C1 0.0495(12) 0.0444(12) 0.0503(13) -0.0011(10) 0.0083(10) -0.0012(9) 
C2 0.0503(13) 0.0759(17) 0.0454(13) 0.0032(12) 0.0035(10) -0.0079(12) 
C3 0.0487(12) 0.0462(12) 0.0512(13) 0.0008(10) 0.0026(10) -0.0066(9) 
C4 0.0499(12) 0.0471(12) 0.0523(13) -0.0007(10) 0.0099(10) 0.0025(10) 
C5 0.0576(16) 0.125(3) 0.0568(16) 0.0038(17) 0.0066(13) -0.0179(17) 
C6 0.0504(15) 0.133(3) 0.074(2) 0.0078(19) 0.0126(14) -0.0166(17) 
Cl1 0.0730(4) 0.0977(6) 0.0871(5) 0.0063(4) 0.0441(4) 0.0140(4) 
C7 0.0584(14) 0.0570(14) 0.0651(16) 0.0041(12) 0.0258(12) 0.0143(11) 
C8 0.0729(18) 0.098(2) 0.0535(15) -0.0174(15) 0.0198(13) -0.0059(16) 
C9 0.0559(15) 0.096(2) 0.0565(15) -0.0163(15) 0.0120(12) -0.0104(14) 
C10 0.0485(12) 0.0557(13) 0.0521(13) 0.0011(11) 0.0010(10) -0.0094(10) 
C11 0.0540(15) 0.135(3) 0.0589(16) -0.0044(18) 0.0049(13) -0.0236(17) 
C12 0.0544(17) 0.167(4) 0.080(2) 0.002(2) 0.0118(15) -0.026(2) 
C13 0.0499(15) 0.091(2) 0.087(2) 0.0017(17) -0.0104(14) -0.0156(14) 
Cl2 0.0546(4) 0.1638(10) 0.1415(9) -0.0042(8) -0.0192(5) -0.0288(5) 
C14 0.0644(19) 0.163(4) 0.072(2) -0.026(2) -0.0122(16) -0.021(2) 
C15 0.0579(17) 0.152(3) 0.0626(18) -0.025(2) 0.0029(14) -0.0163(19) 
O3 0.0449(8) 0.0458(8) 0.0570(9) 0.0104(7) 0.0126(7) -0.0009(6) 
O4 0.0515(9) 0.0411(8) 0.0547(9) 0.0042(7) 0.0150(7) -0.0023(7) 
C16 0.0405(10) 0.0418(11) 0.0404(11) 0.0002(9) 0.0018(8) -0.0047(8) 
C17 0.0426(11) 0.0394(11) 0.0534(12) 0.0030(9) 0.0093(9) -0.0076(9) 
C18 0.0372(10) 0.0435(11) 0.0399(11) -0.0035(9) 0.0017(8) -0.0088(8) 
C19 0.0442(11) 0.0459(12) 0.0440(11) 0.0038(9) 0.0060(9) 0.0003(9) 
C20 0.0528(14) 0.0508(14) 0.0896(19) 0.0118(13) 0.0131(13) -0.0004(11) 
C21 0.084(2) 0.0516(16) 0.123(3) 0.0254(17) 0.025(2) 0.0070(14) 
C22 0.0754(19) 0.0640(18) 0.107(3) 0.0250(16) 0.0228(18) 0.0275(15) 
Cl3 0.1172(8) 0.1013(8) 0.2532(16) 0.0688(9) 0.0473(9) 0.0617(7) 
C23 0.0507(14) 0.0807(19) 0.090(2) 0.0135(16) 0.0178(14) 0.0163(13) 
C24 0.0477(13) 0.0569(14) 0.0689(16) 0.0094(12) 0.0150(11) 0.0008(11) 
C25 0.0400(10) 0.0449(11) 0.0446(11) -0.0072(9) 0.0058(9) -0.0077(9) 
C26 0.0489(12) 0.0589(14) 0.0549(13) 0.0036(11) 0.0111(10) -0.0044(11) 
C27 0.0614(15) 0.0813(19) 0.0578(15) 0.0011(13) 0.0228(12) -0.0122(14) 
C28 0.0528(14) 0.086(2) 0.0613(16) -0.0199(14) 0.0244(12) -0.0042(13) 
Cl4 0.0772(5) 0.1512(9) 0.0992(6) -0.0154(6) 0.0503(5) 0.0131(5) 
C29 0.0606(15) 0.0610(16) 0.0763(18) -0.0172(13) 0.0166(13) 0.0090(12) 
C30 0.0558(13) 0.0452(12) 0.0606(14) -0.0062(11) 0.0137(11) -0.0026(10) 
O5 0.0470(8) 0.0490(9) 0.0688(11) 0.0191(8) 0.0115(7) -0.0003(7) 
O6 0.0439(8) 0.0452(9) 0.0782(11) 0.0131(8) 0.0089(8) -0.0012(7) 
C31 0.0455(11) 0.0486(12) 0.0435(12) 0.0107(10) 0.0033(9) -0.0052(9) 
C32 0.0486(12) 0.0444(12) 0.0662(15) 0.0106(11) 0.0106(11) -0.0012(10) 
C33 0.0434(11) 0.0471(12) 0.0464(12) 0.0050(9) 0.0045(9) -0.0010(9) 
C34 0.0424(11) 0.0488(12) 0.0480(12) 0.0099(10) 0.0020(9) -0.0052(9) 
C35 0.0460(12) 0.0607(15) 0.0813(18) 0.0286(13) 0.0050(12) 0.0011(11) 
C36 0.0407(12) 0.0713(17) 0.097(2) 0.0264(15) 0.0054(13) 0.0011(11) 
C37 0.0455(12) 0.0582(14) 0.0733(16) 0.0148(12) 0.0054(11) -0.0147(11) 
Cl5 0.0602(4) 0.0910(6) 0.1568(9) 0.0479(6) 0.0267(5) -0.0179(4) 
C38 0.0543(14) 0.0515(14) 0.0826(18) 0.0246(13) 0.0053(13) -0.0034(11) 
C39 0.0431(12) 0.0525(13) 0.0741(16) 0.0194(12) 0.0044(11) -0.0006(10) 
C40 0.0438(11) 0.0485(12) 0.0494(12) 0.0095(10) 0.0072(9) -0.0012(9) 
C41 0.0512(13) 0.0473(13) 0.0655(15) 0.0067(11) 0.0070(11) -0.0029(10) 
C42 0.0634(15) 0.0525(14) 0.0739(17) 0.0046(13) 0.0082(13) 0.0115(12) 
C43 0.0484(14) 0.0734(18) 0.0758(18) 0.0089(14) 0.0100(12) 0.0106(12) 
Cl6 0.0545(4) 0.1184(7) 0.1429(9) 0.0042(6) 0.0156(5) 0.0255(4) 
C44 0.0473(14) 0.0726(18) 0.116(3) 0.0025(18) 0.0140(15) -0.0091(13) 
C45 0.0511(14) 0.0502(14) 0.103(2) 0.0028(14) 0.0152(14) -0.0035(11) 
N1 0.0444(10) 0.0589(12) 0.0599(12) 0.0118(10) -0.0005(9) -0.0057(9) 
C46 0.0496(14) 0.0809(19) 0.0810(19) 0.0070(15) 0.0062(13) 0.0067(13) 
C47 0.0496(16) 0.133(3) 0.105(3) 0.016(2) 0.0143(17) 0.0053(18) 
C48 0.0446(16) 0.152(4) 0.108(3) 0.025(3) -0.0037(17) -0.024(2) 
C49 0.0530(15) 0.108(2) 0.0745(19) 0.0227(18) -0.0124(14) -0.0292(16) 
C50 0.080(2) 0.142(4) 0.094(3) 0.007(2) -0.024(2) -0.060(2) 
C51 0.110(3) 0.119(3) 0.082(2) -0.005(2) -0.027(2) -0.059(3) 
C52 0.096(2) 0.0765(19) 0.0593(17) -0.0016(15) -0.0165(16) -0.0306(17) 
C53 0.133(3) 0.082(2) 0.067(2) -0.0241(17) -0.010(2) -0.023(2) 
C54 0.107(3) 0.081(2) 0.074(2) -0.0252(17) 0.0073(18) -0.004(2) 
C55 0.0756(18) 0.0661(16) 0.0646(17) -0.0123(14) 0.0063(14) -0.0036(14) 
N2 0.0570(11) 0.0520(11) 0.0495(11) -0.0013(9) 0.0002(9) -0.0106(9) 
C56 0.0654(15) 0.0589(15) 0.0466(13) 0.0087(11) -0.0090(11) -0.0183(12) 
C57 0.0485(13) 0.0686(16) 0.0539(14) 0.0190(12) -0.0097(11) -0.0192(11) 
  
_geom_special_details 
; 
 All esds (except the esd in the dihedral angle between two l.s. planes) 
 are estimated using the full covariance matrix.  The cell esds are taken 
 into account individually in the estimation of esds in distances, angles 
 and torsion angles; correlations between esds in cell parameters are only 
 used when they are defined by crystal symmetry.  An approximate (isotropic) 
 treatment of cell esds is used for estimating esds involving l.s. planes. 
; 
  
loop_ 
 _geom_bond_atom_site_label_1 
 _geom_bond_atom_site_label_2 
 _geom_bond_distance 
 _geom_bond_site_symmetry_2 
 _geom_bond_publ_flag 
Eu1 O4 2.3260(15) . ? 
Eu1 O1 2.3303(16) . ? 
Eu1 O6 2.3305(16) . ? 
Eu1 O5 2.3421(15) . ? 
Eu1 O3 2.3563(15) . ? 
Eu1 O2 2.3598(16) . ? 
Eu1 N2 2.605(2) . ? 
Eu1 N1 2.617(2) . ? 
O1 C1 1.267(3) . ? 
O2 C3 1.261(3) . ? 
C1 C2 1.394(3) . ? 
C1 C4 1.494(3) . ? 
C2 C3 1.394(3) . ? 
C2 H2A 0.9300 . ? 
C3 C10 1.499(3) . ? 
C4 C5 1.371(4) . ? 
C4 C9 1.374(3) . ? 
C5 C6 1.383(4) . ? 
C5 H5A 0.9300 . ? 
C6 C7 1.358(4) . ? 
C6 H6A 0.9300 . ? 
Cl1 C7 1.738(2) . ? 
C7 C8 1.348(4) . ? 
C8 C9 1.382(4) . ? 
C8 H8A 0.9300 . ? 
C9 H9A 0.9300 . ? 
C10 C15 1.369(4) . ? 
C10 C11 1.371(4) . ? 
C11 C12 1.382(4) . ? 
C11 H11A 0.9300 . ? 
C12 C13 1.357(4) . ? 
C12 H12A 0.9300 . ? 
C13 C14 1.342(4) . ? 
C13 Cl2 1.742(3) . ? 
C14 C15 1.388(4) . ? 
C14 H14A 0.9300 . ? 
C15 H15A 0.9300 . ? 
O3 C16 1.262(2) . ? 
O4 C18 1.258(2) . ? 
C16 C17 1.402(3) . ? 
C16 C19 1.497(3) . ? 
C17 C18 1.394(3) . ? 
C17 H17A 0.9300 . ? 
C18 C25 1.499(3) . ? 
C19 C24 1.384(3) . ? 
C19 C20 1.384(3) . ? 
C20 C21 1.376(4) . ? 
C20 H20A 0.9300 . ? 
C21 C22 1.363(4) . ? 
C21 H21A 0.9300 . ? 
C22 C23 1.368(4) . ? 
C22 Cl3 1.739(3) . ? 
C23 C24 1.378(4) . ? 
C23 H23A 0.9300 . ? 
C24 H24A 0.9300 . ? 
C25 C30 1.388(3) . ? 
C25 C26 1.389(3) . ? 
C26 C27 1.384(3) . ? 
C26 H26A 0.9300 . ? 
C27 C28 1.364(4) . ? 
C27 H27A 0.9300 . ? 
C28 C29 1.376(4) . ? 
C28 Cl4 1.737(2) . ? 
C29 C30 1.377(3) . ? 
C29 H29A 0.9300 . ? 
C30 H30A 0.9300 . ? 
O5 C31 1.258(3) . ? 
O6 C33 1.265(3) . ? 
C31 C32 1.396(3) . ? 
C31 C34 1.499(3) . ? 
C32 C33 1.396(3) . ? 
C32 H32A 0.9300 . ? 
C33 C40 1.495(3) . ? 
C34 C39 1.378(3) . ? 
C34 C35 1.383(3) . ? 
C35 C36 1.380(3) . ? 
C35 H35A 0.9300 . ? 
C36 C37 1.373(4) . ? 
C36 H36A 0.9300 . ? 
C37 C38 1.365(3) . ? 
C37 Cl5 1.741(2) . ? 
C38 C39 1.379(3) . ? 
C38 H38A 0.9300 . ? 
C39 H39A 0.9300 . ? 
C40 C41 1.381(3) . ? 
C40 C45 1.386(3) . ? 
C41 C42 1.383(3) . ? 
C41 H41A 0.9300 . ? 
C42 C43 1.361(4) . ? 
C42 H42A 0.9300 . ? 
C43 C44 1.368(4) . ? 
C43 Cl6 1.740(3) . ? 
C44 C45 1.374(4) . ? 
C44 H44A 0.9300 . ? 
C45 H45A 0.9300 . ? 
N1 C46 1.316(3) . ? 
N1 C57 1.356(3) . ? 
C46 C47 1.402(4) . ? 
C46 H46A 0.9300 . ? 
C47 C48 1.358(5) . ? 
C47 H47A 0.9300 . ? 
C48 C49 1.384(5) . ? 
C48 H48A 0.9300 . ? 
C49 C57 1.410(3) . ? 
C49 C50 1.428(5) . ? 
C50 C51 1.319(6) . ? 
C50 H50A 0.9300 . ? 
C51 C52 1.429(5) . ? 
C51 H51A 0.9300 . ? 
C52 C53 1.391(5) . ? 
C52 C56 1.413(4) . ? 
C53 C54 1.346(5) . ? 
C53 H53A 0.9300 . ? 
C54 C55 1.393(4) . ? 
C54 H54A 0.9300 . ? 
C55 N2 1.319(3) . ? 
C55 H55A 0.9300 . ? 
N2 C56 1.360(3) . ? 
C56 C57 1.429(4) . ? 
  
loop_ 
 _geom_angle_atom_site_label_1 
 _geom_angle_atom_site_label_2 
 _geom_angle_atom_site_label_3 
 _geom_angle 
 _geom_angle_site_symmetry_1 
 _geom_angle_site_symmetry_3 
 _geom_angle_publ_flag 
O4 Eu1 O1 142.91(6) . . ? 
O4 Eu1 O6 77.21(6) . . ? 
O1 Eu1 O6 114.83(6) . . ? 
O4 Eu1 O5 138.69(6) . . ? 
O1 Eu1 O5 75.99(6) . . ? 
O6 Eu1 O5 70.62(6) . . ? 
O4 Eu1 O3 70.91(5) . . ? 
O1 Eu1 O3 88.02(6) . . ? 
O6 Eu1 O3 147.43(5) . . ? 
O5 Eu1 O3 140.50(5) . . ? 
O4 Eu1 O2 78.14(6) . . ? 
O1 Eu1 O2 70.94(6) . . ? 
O6 Eu1 O2 78.42(6) . . ? 
O5 Eu1 O2 118.49(6) . . ? 
O3 Eu1 O2 88.53(6) . . ? 
O4 Eu1 N2 75.59(6) . . ? 
O1 Eu1 N2 138.72(6) . . ? 
O6 Eu1 N2 81.50(6) . . ? 
O5 Eu1 N2 74.65(6) . . ? 
O3 Eu1 N2 96.63(6) . . ? 
O2 Eu1 N2 149.82(6) . . ? 
O4 Eu1 N1 119.71(6) . . ? 
O1 Eu1 N1 79.84(6) . . ? 
O6 Eu1 N1 131.60(6) . . ? 
O5 Eu1 N1 69.10(6) . . ? 
O3 Eu1 N1 72.66(6) . . ? 
O2 Eu1 N1 145.74(6) . . ? 
N2 Eu1 N1 62.89(7) . . ? 
C1 O1 Eu1 131.08(14) . . ? 
C3 O2 Eu1 130.48(14) . . ? 
O1 C1 C2 123.9(2) . . ? 
O1 C1 C4 115.3(2) . . ? 
C2 C1 C4 120.8(2) . . ? 
C3 C2 C1 123.9(2) . . ? 
C3 C2 H2A 118.1 . . ? 
C1 C2 H2A 118.1 . . ? 
O2 C3 C2 124.1(2) . . ? 
O2 C3 C10 115.5(2) . . ? 
C2 C3 C10 120.5(2) . . ? 
C5 C4 C9 117.4(2) . . ? 
C5 C4 C1 118.4(2) . . ? 
C9 C4 C1 124.2(2) . . ? 
C4 C5 C6 121.7(3) . . ? 
C4 C5 H5A 119.2 . . ? 
C6 C5 H5A 119.2 . . ? 
C7 C6 C5 119.2(3) . . ? 
C7 C6 H6A 120.4 . . ? 
C5 C6 H6A 120.4 . . ? 
C8 C7 C6 120.6(2) . . ? 
C8 C7 Cl1 119.8(2) . . ? 
C6 C7 Cl1 119.6(2) . . ? 
C7 C8 C9 120.0(3) . . ? 
C7 C8 H8A 120.0 . . ? 
C9 C8 H8A 120.0 . . ? 
C4 C9 C8 121.1(3) . . ? 
C4 C9 H9A 119.5 . . ? 
C8 C9 H9A 119.5 . . ? 
C15 C10 C11 117.4(2) . . ? 
C15 C10 C3 124.2(2) . . ? 
C11 C10 C3 118.4(2) . . ? 
C10 C11 C12 121.5(3) . . ? 
C10 C11 H11A 119.3 . . ? 
C12 C11 H11A 119.3 . . ? 
C13 C12 C11 119.2(3) . . ? 
C13 C12 H12A 120.4 . . ? 
C11 C12 H12A 120.4 . . ? 
C14 C13 C12 121.0(3) . . ? 
C14 C13 Cl2 119.8(2) . . ? 
C12 C13 Cl2 119.1(3) . . ? 
C13 C14 C15 119.4(3) . . ? 
C13 C14 H14A 120.3 . . ? 
C15 C14 H14A 120.3 . . ? 
C10 C15 C14 121.5(3) . . ? 
C10 C15 H15A 119.3 . . ? 
C14 C15 H15A 119.3 . . ? 
C16 O3 Eu1 135.79(13) . . ? 
C18 O4 Eu1 136.73(14) . . ? 
O3 C16 C17 124.13(19) . . ? 
O3 C16 C19 115.64(18) . . ? 
C17 C16 C19 120.11(18) . . ? 
C18 C17 C16 123.21(19) . . ? 
C18 C17 H17A 118.4 . . ? 
C16 C17 H17A 118.4 . . ? 
O4 C18 C17 124.05(19) . . ? 
O4 C18 C25 114.46(18) . . ? 
C17 C18 C25 121.47(18) . . ? 
C24 C19 C20 118.0(2) . . ? 
C24 C19 C16 118.5(2) . . ? 
C20 C19 C16 123.5(2) . . ? 
C21 C20 C19 121.2(2) . . ? 
C21 C20 H20A 119.4 . . ? 
C19 C20 H20A 119.4 . . ? 
C22 C21 C20 119.3(3) . . ? 
C22 C21 H21A 120.4 . . ? 
C20 C21 H21A 120.3 . . ? 
C21 C22 C23 121.3(3) . . ? 
C21 C22 Cl3 120.0(2) . . ? 
C23 C22 Cl3 118.8(2) . . ? 
C22 C23 C24 119.1(3) . . ? 
C22 C23 H23A 120.5 . . ? 
C24 C23 H23A 120.5 . . ? 
C23 C24 C19 121.1(2) . . ? 
C23 C24 H24A 119.4 . . ? 
C19 C24 H24A 119.4 . . ? 
C30 C25 C26 118.2(2) . . ? 
C30 C25 C18 117.8(2) . . ? 
C26 C25 C18 124.0(2) . . ? 
C27 C26 C25 120.6(2) . . ? 
C27 C26 H26A 119.7 . . ? 
C25 C26 H26A 119.7 . . ? 
C28 C27 C26 119.5(2) . . ? 
C28 C27 H27A 120.2 . . ? 
C26 C27 H27A 120.2 . . ? 
C27 C28 C29 121.4(2) . . ? 
C27 C28 Cl4 119.8(2) . . ? 
C29 C28 Cl4 118.7(2) . . ? 
C28 C29 C30 118.8(3) . . ? 
C28 C29 H29A 120.6 . . ? 
C30 C29 H29A 120.6 . . ? 
C29 C30 C25 121.5(2) . . ? 
C29 C30 H30A 119.3 . . ? 
C25 C30 H30A 119.3 . . ? 
C31 O5 Eu1 138.64(14) . . ? 
C33 O6 Eu1 138.28(14) . . ? 
O5 C31 C32 124.03(19) . . ? 
O5 C31 C34 114.71(19) . . ? 
C32 C31 C34 121.2(2) . . ? 
C31 C32 C33 122.9(2) . . ? 
C31 C32 H32A 118.6 . . ? 
C33 C32 H32A 118.6 . . ? 
O6 C33 C32 124.4(2) . . ? 
O6 C33 C40 115.15(18) . . ? 
C32 C33 C40 120.5(2) . . ? 
C39 C34 C35 118.0(2) . . ? 
C39 C34 C31 123.8(2) . . ? 
C35 C34 C31 118.2(2) . . ? 
C36 C35 C34 121.9(2) . . ? 
C36 C35 H35A 119.1 . . ? 
C34 C35 H35A 119.1 . . ? 
C37 C36 C35 118.3(2) . . ? 
C37 C36 H36A 120.8 . . ? 
C35 C36 H36A 120.8 . . ? 
C38 C37 C36 121.3(2) . . ? 
C38 C37 Cl5 118.88(19) . . ? 
C36 C37 Cl5 119.7(2) . . ? 
C37 C38 C39 119.4(2) . . ? 
C37 C38 H38A 120.3 . . ? 
C39 C38 H38A 120.3 . . ? 
C34 C39 C38 121.0(2) . . ? 
C34 C39 H39A 119.5 . . ? 
C38 C39 H39A 119.5 . . ? 
C41 C40 C45 118.0(2) . . ? 
C41 C40 C33 123.7(2) . . ? 
C45 C40 C33 118.3(2) . . ? 
C40 C41 C42 120.9(2) . . ? 
C40 C41 H41A 119.6 . . ? 
C42 C41 H41A 119.6 . . ? 
C43 C42 C41 119.5(2) . . ? 
C43 C42 H42A 120.3 . . ? 
C41 C42 H42A 120.3 . . ? 
C42 C43 C44 121.0(2) . . ? 
C42 C43 Cl6 119.2(2) . . ? 
C44 C43 Cl6 119.9(2) . . ? 
C43 C44 C45 119.4(3) . . ? 
C43 C44 H44A 120.3 . . ? 
C45 C44 H44A 120.3 . . ? 
C44 C45 C40 121.2(3) . . ? 
C44 C45 H45A 119.4 . . ? 
C40 C45 H45A 119.4 . . ? 
C46 N1 C57 118.6(2) . . ? 
C46 N1 Eu1 121.53(18) . . ? 
C57 N1 Eu1 118.09(16) . . ? 
N1 C46 C47 122.9(3) . . ? 
N1 C46 H46A 118.6 . . ? 
C47 C46 H46A 118.6 . . ? 
C48 C47 C46 118.3(3) . . ? 
C48 C47 H47A 120.8 . . ? 
C46 C47 H47A 120.8 . . ? 
C47 C48 C49 121.0(3) . . ? 
C47 C48 H48A 119.5 . . ? 
C49 C48 H48A 119.5 . . ? 
C48 C49 C57 117.1(3) . . ? 
C48 C49 C50 123.8(3) . . ? 
C57 C49 C50 119.1(3) . . ? 
C51 C50 C49 121.2(3) . . ? 
C51 C50 H50A 119.4 . . ? 
C49 C50 H50A 119.4 . . ? 
C50 C51 C52 122.4(3) . . ? 
C50 C51 H51A 118.8 . . ? 
C52 C51 H51A 118.8 . . ? 
C53 C52 C56 117.2(3) . . ? 
C53 C52 C51 124.8(3) . . ? 
C56 C52 C51 118.0(3) . . ? 
C54 C53 C52 120.8(3) . . ? 
C54 C53 H53A 119.6 . . ? 
C52 C53 H53A 119.6 . . ? 
C53 C54 C55 118.6(3) . . ? 
C53 C54 H54A 120.7 . . ? 
C55 C54 H54A 120.7 . . ? 
N2 C55 C54 123.4(3) . . ? 
N2 C55 H55A 118.3 . . ? 
C54 C55 H55A 118.3 . . ? 
C55 N2 C56 118.3(2) . . ? 
C55 N2 Eu1 121.91(17) . . ? 
C56 N2 Eu1 118.59(16) . . ? 
N2 C56 C52 121.6(3) . . ? 
N2 C56 C57 118.4(2) . . ? 
C52 C56 C57 120.0(3) . . ? 
N1 C57 C49 122.1(3) . . ? 
N1 C57 C56 118.6(2) . . ? 
C49 C57 C56 119.3(3) . . ? 
  
loop_ 
 _geom_torsion_atom_site_label_1 
 _geom_torsion_atom_site_label_2 
 _geom_torsion_atom_site_label_3 
 _geom_torsion_atom_site_label_4 
 _geom_torsion 
 _geom_torsion_site_symmetry_1 
 _geom_torsion_site_symmetry_2 
 _geom_torsion_site_symmetry_3 
 _geom_torsion_site_symmetry_4 
 _geom_torsion_publ_flag 
O4 Eu1 O1 C1 -74.1(2) . . . . ? 
O6 Eu1 O1 C1 27.9(2) . . . . ? 
O5 Eu1 O1 C1 88.4(2) . . . . ? 
O3 Eu1 O1 C1 -128.1(2) . . . . ? 
O2 Eu1 O1 C1 -38.95(19) . . . . ? 
N2 Eu1 O1 C1 134.13(18) . . . . ? 
N1 Eu1 O1 C1 159.2(2) . . . . ? 
O4 Eu1 O2 C3 -162.7(2) . . . . ? 
O1 Eu1 O2 C3 38.1(2) . . . . ? 
O6 Eu1 O2 C3 -83.5(2) . . . . ? 
O5 Eu1 O2 C3 -23.3(2) . . . . ? 
O3 Eu1 O2 C3 126.5(2) . . . . ? 
N2 Eu1 O2 C3 -132.82(19) . . . . ? 
N1 Eu1 O2 C3 71.1(2) . . . . ? 
Eu1 O1 C1 C2 30.0(3) . . . . ? 
Eu1 O1 C1 C4 -150.52(15) . . . . ? 
O1 C1 C2 C3 2.8(4) . . . . ? 
C4 C1 C2 C3 -176.6(2) . . . . ? 
Eu1 O2 C3 C2 -28.5(4) . . . . ? 
Eu1 O2 C3 C10 151.48(16) . . . . ? 
C1 C2 C3 O2 -3.2(4) . . . . ? 
C1 C2 C3 C10 176.9(2) . . . . ? 
O1 C1 C4 C5 11.8(3) . . . . ? 
C2 C1 C4 C5 -168.8(3) . . . . ? 
O1 C1 C4 C9 -169.7(2) . . . . ? 
C2 C1 C4 C9 9.7(4) . . . . ? 
C9 C4 C5 C6 0.6(5) . . . . ? 
C1 C4 C5 C6 179.2(3) . . . . ? 
C4 C5 C6 C7 -0.4(5) . . . . ? 
C5 C6 C7 C8 0.1(5) . . . . ? 
C5 C6 C7 Cl1 -179.1(3) . . . . ? 
C6 C7 C8 C9 -0.1(5) . . . . ? 
Cl1 C7 C8 C9 179.1(2) . . . . ? 
C5 C4 C9 C8 -0.6(4) . . . . ? 
C1 C4 C9 C8 -179.1(3) . . . . ? 
C7 C8 C9 C4 0.3(5) . . . . ? 
O2 C3 C10 C15 166.2(3) . . . . ? 
C2 C3 C10 C15 -13.8(4) . . . . ? 
O2 C3 C10 C11 -14.1(4) . . . . ? 
C2 C3 C10 C11 165.8(3) . . . . ? 
C15 C10 C11 C12 0.0(5) . . . . ? 
C3 C10 C11 C12 -179.6(3) . . . . ? 
C10 C11 C12 C13 -0.3(6) . . . . ? 
C11 C12 C13 C14 1.0(6) . . . . ? 
C11 C12 C13 Cl2 178.7(3) . . . . ? 
C12 C13 C14 C15 -1.3(6) . . . . ? 
Cl2 C13 C14 C15 -179.0(3) . . . . ? 
C11 C10 C15 C14 -0.4(5) . . . . ? 
C3 C10 C15 C14 179.3(3) . . . . ? 
C13 C14 C15 C10 1.0(7) . . . . ? 
O4 Eu1 O3 C16 -20.95(19) . . . . ? 
O1 Eu1 O3 C16 128.0(2) . . . . ? 
O6 Eu1 O3 C16 -8.6(3) . . . . ? 
O5 Eu1 O3 C16 -167.04(18) . . . . ? 
O2 Eu1 O3 C16 57.0(2) . . . . ? 
N2 Eu1 O3 C16 -93.2(2) . . . . ? 
N1 Eu1 O3 C16 -152.1(2) . . . . ? 
O1 Eu1 O4 C18 -35.1(2) . . . . ? 
O6 Eu1 O4 C18 -149.5(2) . . . . ? 
O5 Eu1 O4 C18 171.19(18) . . . . ? 
O3 Eu1 O4 C18 23.72(19) . . . . ? 
O2 Eu1 O4 C18 -68.9(2) . . . . ? 
N2 Eu1 O4 C18 126.1(2) . . . . ? 
N1 Eu1 O4 C18 79.6(2) . . . . ? 
Eu1 O3 C16 C17 12.7(3) . . . . ? 
Eu1 O3 C16 C19 -171.28(14) . . . . ? 
O3 C16 C17 C18 7.1(3) . . . . ? 
C19 C16 C17 C18 -168.7(2) . . . . ? 
Eu1 O4 C18 C17 -17.8(3) . . . . ? 
Eu1 O4 C18 C25 164.32(14) . . . . ? 
C16 C17 C18 O4 -5.0(3) . . . . ? 
C16 C17 C18 C25 172.78(19) . . . . ? 
O3 C16 C19 C24 -23.0(3) . . . . ? 
C17 C16 C19 C24 153.1(2) . . . . ? 
O3 C16 C19 C20 156.8(2) . . . . ? 
C17 C16 C19 C20 -27.0(3) . . . . ? 
C24 C19 C20 C21 -1.2(4) . . . . ? 
C16 C19 C20 C21 178.9(3) . . . . ? 
C19 C20 C21 C22 -0.9(5) . . . . ? 
C20 C21 C22 C23 1.6(6) . . . . ? 
C20 C21 C22 Cl3 -178.2(3) . . . . ? 
C21 C22 C23 C24 -0.1(5) . . . . ? 
Cl3 C22 C23 C24 179.7(2) . . . . ? 
C22 C23 C24 C19 -2.1(5) . . . . ? 
C20 C19 C24 C23 2.8(4) . . . . ? 
C16 C19 C24 C23 -177.3(2) . . . . ? 
O4 C18 C25 C30 -15.0(3) . . . . ? 
C17 C18 C25 C30 167.0(2) . . . . ? 
O4 C18 C25 C26 164.3(2) . . . . ? 
C17 C18 C25 C26 -13.7(3) . . . . ? 
C30 C25 C26 C27 0.1(3) . . . . ? 
C18 C25 C26 C27 -179.2(2) . . . . ? 
C25 C26 C27 C28 -1.1(4) . . . . ? 
C26 C27 C28 C29 1.3(4) . . . . ? 
C26 C27 C28 Cl4 -179.3(2) . . . . ? 
C27 C28 C29 C30 -0.4(4) . . . . ? 
Cl4 C28 C29 C30 -179.8(2) . . . . ? 
C28 C29 C30 C25 -0.7(4) . . . . ? 
C26 C25 C30 C29 0.8(4) . . . . ? 
C18 C25 C30 C29 -179.9(2) . . . . ? 
O4 Eu1 O5 C31 31.0(3) . . . . ? 
O1 Eu1 O5 C31 -133.1(2) . . . . ? 
O6 Eu1 O5 C31 -9.9(2) . . . . ? 
O3 Eu1 O5 C31 158.0(2) . . . . ? 
O2 Eu1 O5 C31 -74.3(2) . . . . ? 
N2 Eu1 O5 C31 76.3(2) . . . . ? 
N1 Eu1 O5 C31 142.6(2) . . . . ? 
O4 Eu1 O6 C33 -141.8(2) . . . . ? 
O1 Eu1 O6 C33 75.5(2) . . . . ? 
O5 Eu1 O6 C33 11.9(2) . . . . ? 
O3 Eu1 O6 C33 -153.8(2) . . . . ? 
O2 Eu1 O6 C33 137.9(2) . . . . ? 
N2 Eu1 O6 C33 -64.7(2) . . . . ? 
N1 Eu1 O6 C33 -23.2(3) . . . . ? 
Eu1 O5 C31 C32 5.8(4) . . . . ? 
Eu1 O5 C31 C34 -175.49(15) . . . . ? 
O5 C31 C32 C33 3.4(4) . . . . ? 
C34 C31 C32 C33 -175.3(2) . . . . ? 
Eu1 O6 C33 C32 -9.7(4) . . . . ? 
Eu1 O6 C33 C40 171.86(16) . . . . ? 
C31 C32 C33 O6 -1.6(4) . . . . ? 
C31 C32 C33 C40 176.8(2) . . . . ? 
O5 C31 C34 C39 -163.3(2) . . . . ? 
C32 C31 C34 C39 15.5(4) . . . . ? 
O5 C31 C34 C35 13.6(3) . . . . ? 
C32 C31 C34 C35 -167.6(2) . . . . ? 
C39 C34 C35 C36 0.4(4) . . . . ? 
C31 C34 C35 C36 -176.6(3) . . . . ? 
C34 C35 C36 C37 0.5(5) . . . . ? 
C35 C36 C37 C38 -1.0(5) . . . . ? 
C35 C36 C37 Cl5 176.7(2) . . . . ? 
C36 C37 C38 C39 0.5(5) . . . . ? 
Cl5 C37 C38 C39 -177.1(2) . . . . ? 
C35 C34 C39 C38 -0.9(4) . . . . ? 
C31 C34 C39 C38 176.0(2) . . . . ? 
C37 C38 C39 C34 0.4(4) . . . . ? 
O6 C33 C40 C41 -159.2(2) . . . . ? 
C32 C33 C40 C41 22.3(4) . . . . ? 
O6 C33 C40 C45 20.7(3) . . . . ? 
C32 C33 C40 C45 -157.8(2) . . . . ? 
C45 C40 C41 C42 -1.4(4) . . . . ? 
C33 C40 C41 C42 178.5(2) . . . . ? 
C40 C41 C42 C43 1.0(4) . . . . ? 
C41 C42 C43 C44 0.5(5) . . . . ? 
C41 C42 C43 Cl6 -180.0(2) . . . . ? 
C42 C43 C44 C45 -1.5(5) . . . . ? 
Cl6 C43 C44 C45 179.0(3) . . . . ? 
C43 C44 C45 C40 1.1(5) . . . . ? 
C41 C40 C45 C44 0.4(4) . . . . ? 
C33 C40 C45 C44 -179.6(3) . . . . ? 
O4 Eu1 N1 C46 -127.9(2) . . . . ? 
O1 Eu1 N1 C46 18.3(2) . . . . ? 
O6 Eu1 N1 C46 132.6(2) . . . . ? 
O5 Eu1 N1 C46 97.1(2) . . . . ? 
O3 Eu1 N1 C46 -72.8(2) . . . . ? 
O2 Eu1 N1 C46 -13.2(3) . . . . ? 
N2 Eu1 N1 C46 -180.0(2) . . . . ? 
O4 Eu1 N1 C57 67.56(17) . . . . ? 
O1 Eu1 N1 C57 -146.27(17) . . . . ? 
O6 Eu1 N1 C57 -32.0(2) . . . . ? 
O5 Eu1 N1 C57 -67.50(16) . . . . ? 
O3 Eu1 N1 C57 122.64(17) . . . . ? 
O2 Eu1 N1 C57 -177.77(14) . . . . ? 
N2 Eu1 N1 C57 15.44(15) . . . . ? 
C57 N1 C46 C47 0.8(4) . . . . ? 
Eu1 N1 C46 C47 -163.7(2) . . . . ? 
N1 C46 C47 C48 -0.8(5) . . . . ? 
C46 C47 C48 C49 0.0(6) . . . . ? 
C47 C48 C49 C57 0.7(5) . . . . ? 
C47 C48 C49 C50 -179.9(4) . . . . ? 
C48 C49 C50 C51 179.4(4) . . . . ? 
C57 C49 C50 C51 -1.3(6) . . . . ? 
C49 C50 C51 C52 0.6(7) . . . . ? 
C50 C51 C52 C53 -178.3(4) . . . . ? 
C50 C51 C52 C56 0.8(6) . . . . ? 
C56 C52 C53 C54 1.5(5) . . . . ? 
C51 C52 C53 C54 -179.4(4) . . . . ? 
C52 C53 C54 C55 -0.1(6) . . . . ? 
C53 C54 C55 N2 -0.8(5) . . . . ? 
C54 C55 N2 C56 0.3(4) . . . . ? 
C54 C55 N2 Eu1 167.5(2) . . . . ? 
O4 Eu1 N2 C55 43.0(2) . . . . ? 
O1 Eu1 N2 C55 -154.16(19) . . . . ? 
O6 Eu1 N2 C55 -35.9(2) . . . . ? 
O5 Eu1 N2 C55 -108.0(2) . . . . ? 
O3 Eu1 N2 C55 111.3(2) . . . . ? 
O2 Eu1 N2 C55 12.7(3) . . . . ? 
N1 Eu1 N2 C55 177.9(2) . . . . ? 
O4 Eu1 N2 C56 -149.84(18) . . . . ? 
O1 Eu1 N2 C56 13.0(2) . . . . ? 
O6 Eu1 N2 C56 131.27(18) . . . . ? 
O5 Eu1 N2 C56 59.13(17) . . . . ? 
O3 Eu1 N2 C56 -81.54(17) . . . . ? 
O2 Eu1 N2 C56 179.92(15) . . . . ? 
N1 Eu1 N2 C56 -14.90(16) . . . . ? 
C55 N2 C56 C52 1.1(4) . . . . ? 
Eu1 N2 C56 C52 -166.6(2) . . . . ? 
C55 N2 C56 C57 -178.4(2) . . . . ? 
Eu1 N2 C56 C57 13.9(3) . . . . ? 
C53 C52 C56 N2 -2.0(4) . . . . ? 
C51 C52 C56 N2 178.8(3) . . . . ? 
C53 C52 C56 C57 177.6(3) . . . . ? 
C51 C52 C56 C57 -1.7(4) . . . . ? 
C46 N1 C57 C49 0.0(4) . . . . ? 
Eu1 N1 C57 C49 165.0(2) . . . . ? 
C46 N1 C57 C56 179.5(2) . . . . ? 
Eu1 N1 C57 C56 -15.5(3) . . . . ? 
C48 C49 C57 N1 -0.8(4) . . . . ? 
C50 C49 C57 N1 179.8(3) . . . . ? 
C48 C49 C57 C56 179.8(3) . . . . ? 
C50 C49 C57 C56 0.4(4) . . . . ? 
N2 C56 C57 N1 1.2(3) . . . . ? 
C52 C56 C57 N1 -178.4(2) . . . . ? 
N2 C56 C57 C49 -179.4(2) . . . . ? 
C52 C56 C57 C49 1.1(4) . . . . ? 
  
_diffrn_measured_fraction_theta_max    0.969 
_diffrn_reflns_theta_full              27.87 
_diffrn_measured_fraction_theta_full   0.969 
_refine_diff_density_max    0.589 
_refine_diff_density_min   -0.450 
_refine_diff_density_rms    0.052 
